# Supplementary material for: Metal-free synthesis of 3,3′-bisindolylmethanes in water using Ph3C+[B(C6F5)4]− as the pre-catalyst
Source: Royal Society of Chemistry journal article supplement (doi:10.1039/d2qo01081j), 2022-01-01
Supplement: d2qo01081j1.pdf [file d2qo01081j1.pdf]

## Supplementary Information

### Metal-free Synthesis of 3,3'-Bisindolylmethanes in Water Using $\text{Ph}_3\text{C}^+[\text{B}(\text{C}_6\text{F}_5)_4]^-$ as Pre-catalyst

Zhenguo Zhang,<sup>a</sup> Liang Ji,<sup>a</sup> XiaoXiao Liu,<sup>a</sup> ZhiHong Li,<sup>c</sup> YongHeng Lv,<sup>a</sup> Zhenhua Jia\*<sup>a</sup> and Teck-Peng Loh\*<sup>b,d</sup>

<sup>a</sup>Institute of Advanced Synthesis, School of Chemistry and Molecular Engineering Nanjing Tech University, 30 South Puzhu Road, Nanjing, 211816, China.

<sup>b</sup>Division of Chemistry and Biological Chemistry, School of Physical and Mathematical Sciences, Nanyang Technological University, 637371, Singapore.

<sup>c</sup>Jiangsu Key Laboratory of Drug Design and Optimization, and Department of Chemistry, China Pharmaceutical University, Nanjing 211198, China

<sup>d</sup>College of Advanced Interdisciplinary Science and Technology, Henan University of Technology, Zhengzhou, 450001, China

\*Correspondence and requests for materials should be addressed to Z.J. and T.-P. L.

E-mail: [iaszhjia@njtech.edu.cn](mailto:iaszhjia@njtech.edu.cn); E-mail: [teckpeng@ntu.edu.sg](mailto:teckpeng@ntu.edu.sg)

## Table of Contents

|                                                       |      |
|-------------------------------------------------------|------|
| 1. General information.....                           | S3   |
| 2. Starting materials.....                            | S4   |
| 3. Synthesis and characterization of substrates ..... | S6   |
| 4. General procedure .....                            | S9   |
| 5. Optimization of the reaction conditions. ....      | S10  |
| 6. Synthetic application .....                        | S13  |
| 7. Mechanistic studies .....                          | S16  |
| 8. X-ray data of compound <b>53</b> .....             | S20  |
| 9. Compound characterization data .....               | S26  |
| 10. Spectra for compounds .....                       | S61  |
| 11. References .....                                  | S202 |

## 1. General information

All chemicals were purchased from J&K Scientific or Bidepharm unless otherwise specified.  $\text{Ph}_3\text{C}^+[\text{B}(\text{C}_6\text{F}_5)_4]^-$  was purchased from Energy Chemical. Anhydrous solvents were purchased from J&K Scientific and directly used. Unless otherwise noted, reagents were commercially available and used as purchased. All reactions were conducted under a nitrogen atmosphere or air by using standard Schlenk or vacuum line techniques. All glassware and vials were oven-dried prior to use. All work-up and purification procedures were carried out with reagent-grade solvents. Analytical thin-layer chromatography (TLC) was performed using glass plates precoated with 0.25 mm Kiesegel 60 F<sub>254</sub>(Merck). The developed chromatography was analyzed by UV lamp (254 nm and 365 nm). Flash chromatography was performed on 200-400 mesh silica gel with the indicated eluents. GC-MS analysis was conducted on an Agilent 7890A GC System with an Agilent 5975C MSD or Bruker SCION TQ with Bruker 456 GC System. Proton Nuclear magnetic resonance (<sup>1</sup>H NMR) spectra were recorded at 400 MHz in indicated deuterated solvents and coupling constants (*J*) were reported in Hertz (Hz). Splitting patterns were designated as s, singlet; d, doublet; t, triplet; q, quartet; m, multiplet; br, broad; dd, doublet of doublets, *etc.* The chemical shifts were reported on the  $\delta$  scale (*ppm*). Carbon nuclear magnetic resonance spectra (<sup>13</sup>C NMR) were recorded at 101 MHz and the chemical shifts were accurate to one decimal place or two decimal places to help distinguish overlapping peaks. High resolution mass spectrometry (HRMS) data were obtained on a Waters LC-TOF mass spectrometer (Xevo G2-XS QTof) using electrospray ionization (ESI) in positive mode.

## 2. Starting materials

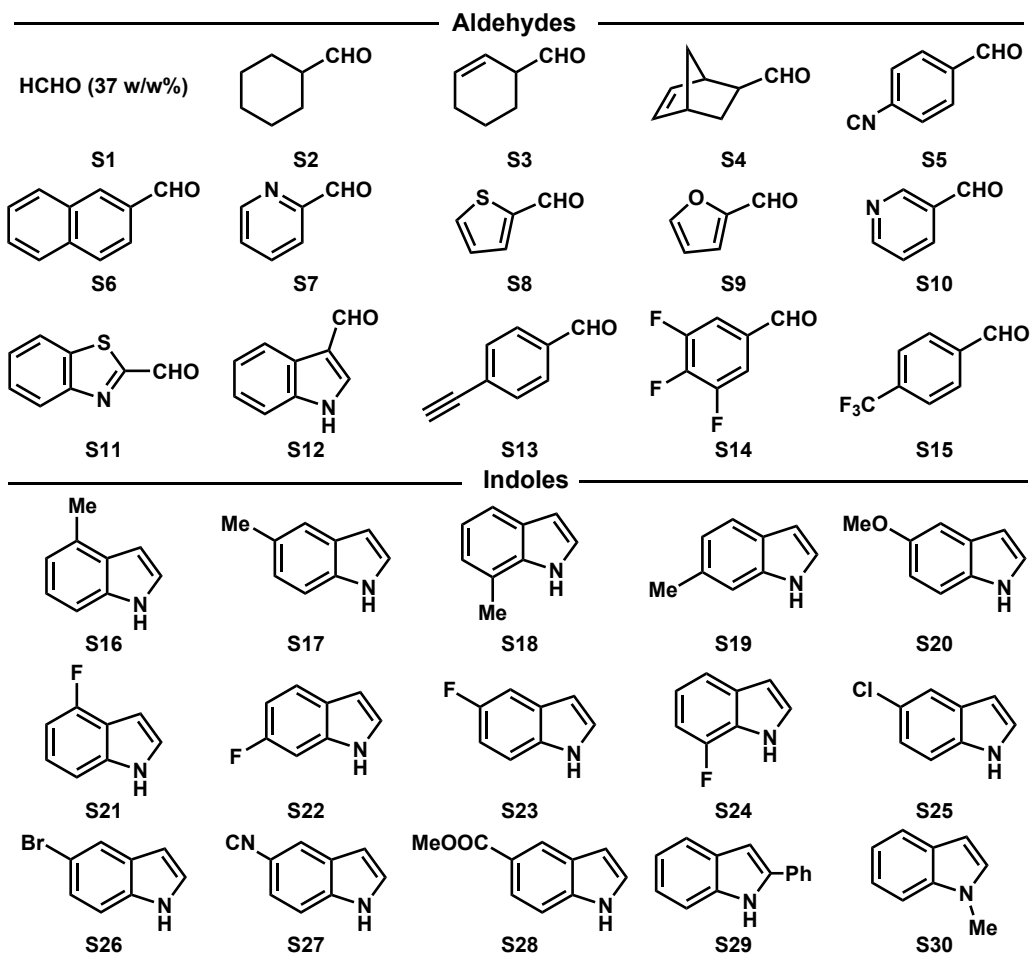

Figure S1. The structure of aldehydes and indoles

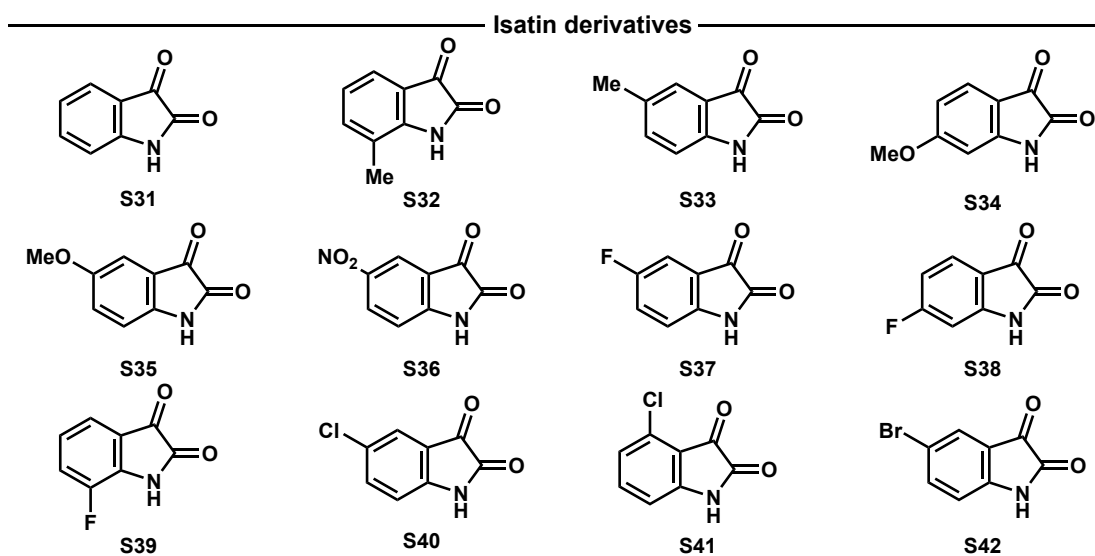

Figure S2. The structure of isatins

**Carbohydrates**

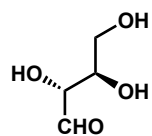

S43  
D-(-)-Erythrose

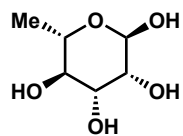

S44  
 $\alpha$ -L-Rhamnopyranose  
monohydrate

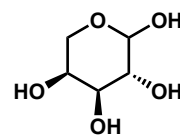

S45  
L-(+)-Arabinose

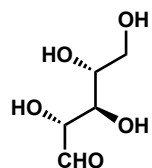

S46  
D-Ribose

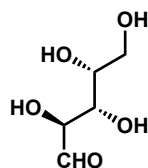

S47  
D-Lyxose

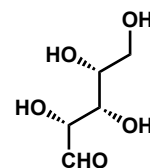

S48  
D-(+)-Xylose

----- **Late-stage natural complex and drugs** -----

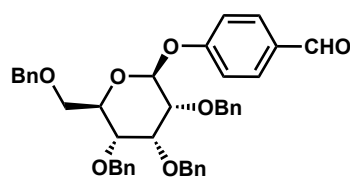

S49  
From Helicid

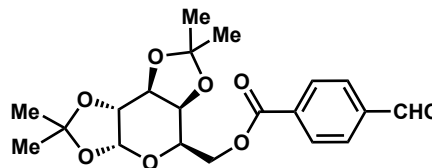

S50  
From Galactose

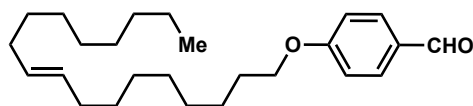

S51  
From Oleyl alcohol

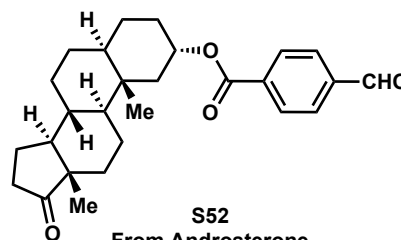

S52  
From Androsterone

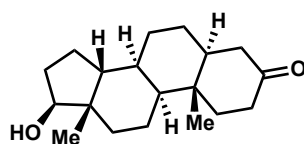

S53  
Stanolone

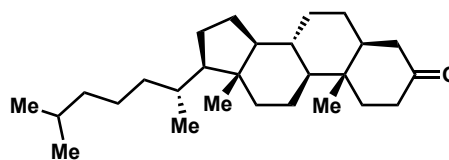

S54  
Dihydrocholesterol

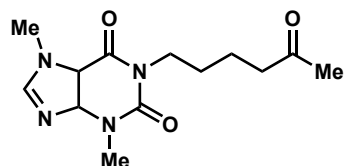

S55  
Pentoxifylline

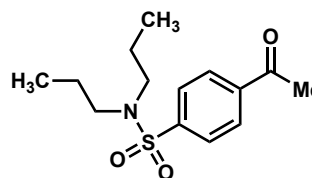

S56  
From Probenecid

**Figure S3. The structure of carbohydrates, natural complex and drugs**

### 3. Synthesis and characterization of substrates

Substrates S1-S49, S51-S53 and S55 in Figures S1-S3 are commercially available.

#### Preparation of S50, S54 and S56

Substrates S50 and S54 in Supplementary Figure S3 were prepared according to the method below.<sup>1-7</sup>

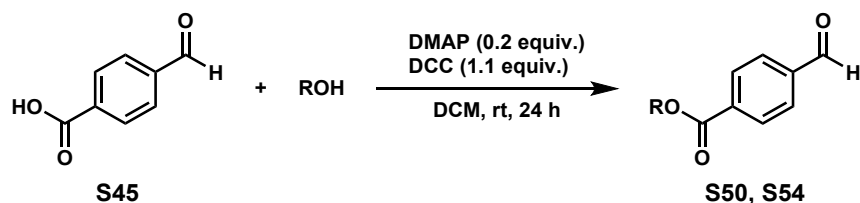

To a suspension of 4-formylbenzoic acid S45 (0.5 g, 3.33 mmol) in dichloromethane (8 mL) were added *N,N*-dimethyl-4-aminopyridine (DMAP, 81.4 mg, 0.67 mmol), alcohol (1.13 g, 4.33 mmol) and *N,N'*-dicyclohexylcarbodiimide (DCC, 0.756 g, 3.66 mmol). The mixture was stirred at room temperature for 24 h then diethyl ether (20 mL) was added. The precipitate was filtered through celite and the filtrate was successively washed with a 1 N aqueous solution of HCl (2 × 20 mL), saturated aqueous NaHCO<sub>3</sub> solution (2 × 20 mL) and brine (2 × 20 mL). The organic phase was then dried over anhydrous MgSO<sub>4</sub>, filtered and concentrated under reduced pressure. Purification by flash chromatography (PE/EA, 10:1, v/v) to yield the corresponding ester.

#### (5*R*,5*aS*,8*aS*,8*bR*)-2,2,7,7-tetramethyltetrahydro-5*H*-bis([1,3]dioxolo)[4,5-*b*:4',5'-*d*]pyran-5-yl)methyl 4-formylbenzoate (S50)

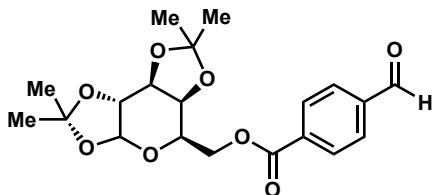

White solid:  $R_f$  0.40 (PE/EA, 5:1, v/v);  $^1\text{H NMR}$  (400 MHz,  $\text{CDCl}_3$ )  $\delta$  10.08 (s, 1H), 8.18 (d,  $J = 8.3$  Hz, 2H), 7.93 (d,  $J = 8.3$  Hz, 2H), 5.55 (d,  $J = 5.0$  Hz, 1H), 4.65 (dd,  $J = 7.9$ , 2.5 Hz, 1H), 4.54 (dd,  $J = 11.6$ , 4.6 Hz, 1H), 4.45 (dd,  $J = 11.6$ , 7.7 Hz, 1H), 4.36 – 4.29 (m, 2H), 4.20 – 4.15 (m, 1H), 1.50 (s, 3H), 1.46 (s, 3H), 1.34 (s, 3H), 1.32 (s, 3H).  $^{13}\text{C NMR}$  (101 MHz,  $\text{CDCl}_3$ )  $\delta$  191.78, 165.52, 139.25, 135.07, 130.39, 129.61, 109.85, 108.93, 96.39, 77.47, 77.15, 76.83, 71.17, 70.79, 70.53, 66.14, 64.60, 26.09, 26.05, 25.03, 24.56. Data in accordance with the literature.<sup>1</sup>

**(2*S*,5*S*,8*R*,9*S*,10*S*,13*S*,14*S*)-10,13-dimethyl-17-oxohexadecahydro-1*H*-cyclopenta [*a*]phenanthrene-2-yl 4-formylbenzoate (S52)**

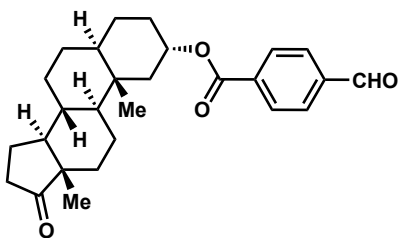

White solid:  $R_f$  0.63 (100% DCM);  $^1\text{H NMR}$  (400 MHz,  $\text{CDCl}_3$ )  $\delta$  10.11 (s, 1H), 8.20 (d,  $J = 8.3$  Hz, 2H), 7.96 (d,  $J = 8.0$  Hz, 2H), 5.32 (1H), 2.45 (dd,  $J = 19.3$ , 8.6 Hz, 1H), 2.12-2.03 (m, 1H), 1.98-1.88 (m, 2H), 1.83-1.75 (m, 3H), 1.72-1.69 (m, 1H), 1.66-1.56 (m, 6H), 1.54-1.48 (m, 1H), 1.41-1.23 (m, 6H), 1.09-0.99 (m, 1H), 0.88 (s, 6H).  $^{13}\text{C NMR}$  (101 MHz,  $\text{CDCl}_3$ )  $\delta$  221.5, 191.8, 165.0, 139.1, 136.2, 130.2, 129.6, 71.6, 54.5, 51.5, 47.9, 40.6, 36.2, 35.9, 35.1, 33.2, 33.0, 31.6, 30.8, 28.1, 26.3, 21.8, 26.3, 13.9, 11.5.

#### 4-acetyl-*N,N*-dipropylbenzenesulfonamide (S56)<sup>8</sup>

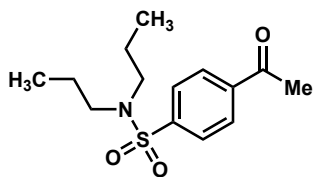

**The synthesis of S56:** A mixture of 4-acetylbenzenesulfonyl chloride (400 mg, 1.84 mmol), dipropylamine (2 M in THF, 1.0 mL, 2.0 mmol), and triethylamine (370 mg, 3.66 mmol) in anhydrous THF (10 mL) was stirred at room temperature overnight. Brine was added, and the reaction mixture was extracted with EA (3 times). The combined organic layer was washed with brine (30 mL), dried over anhydrous Na<sub>2</sub>SO<sub>4</sub>, and filtered. Removal of solvent in vacuo gave **S56** as an off-white solid (304 mg, 73%).

Off-white solid: *R<sub>f</sub>* 0.50 (PE/EA, 2:1, v/v); <sup>1</sup>H NMR (400 MHz, CDCl<sub>3</sub>) δ 8.10-8.02 (m, 2H), 7.93-7.86 (m, 2H), 3.14-3.06 (m, 4H), 2.65 (s, 3H), 1.55 (dq, *J* = 14.9, 7.3 Hz, 4H), 0.87 (t, *J* = 7.4 Hz, 6H). <sup>13</sup>C NMR (101 MHz, CDCl<sub>3</sub>) δ 196.98, 144.32, 139.70, 128.96, 127.36, 50.01, 26.96, 22.04, 11.25.



## 4. General procedure

**General procedure for bisindolylmethanes (BIMs):** To a well-dried flask (25 mL) equipped with a magnetic stir bar,  $\text{Ph}_3\text{C}^+[\text{B}(\text{C}_6\text{F}_5)_4]^-$  (0.01M Pre-stored solution in  $\text{H}_2\text{O}$ , 40.0  $\mu\text{L}$ ), tryptamines derivatives (0.5 mmol, 1.0 equiv.), aldehydes (0.3 mmol, 0.6 equiv.) were added. Then, 2.5 mL pure water was added *via* syringe. The resulting solution was heated in an oil bath at 80 °C and stirred vigorously for 8 hours. When the reaction was complete, the mixture was diluted with EA (1 mL), and extracted with EA (3 $\times$ 5 mL), and the organic phase was dried over anhydrous sodium sulfate. The solvent was removed under reduced pressure, and the crude mixture was purified by preparative thin layer chromatography or flash column chromatography.

### Product Calibration

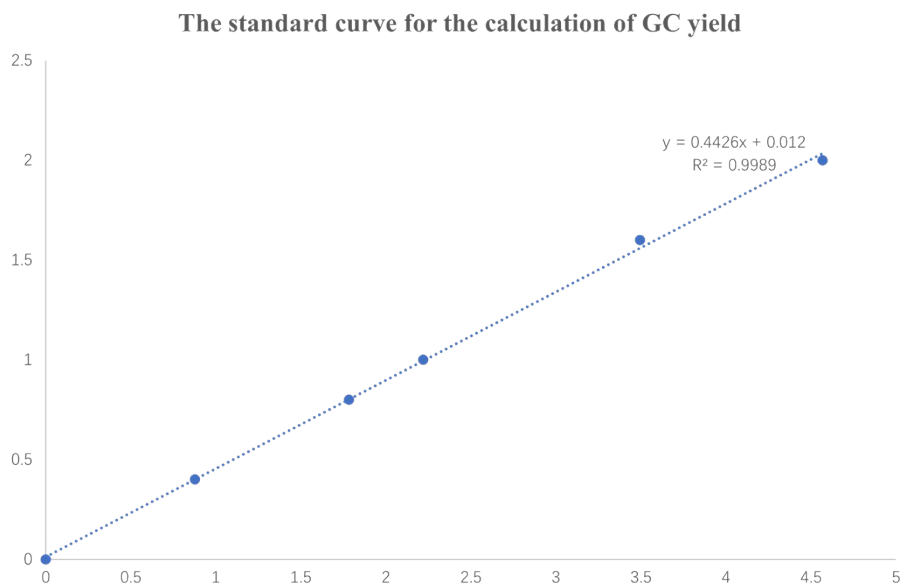

## 5. Optimization of the reaction conditions.

Table S1. Screening Ion-pairs as catalyst.

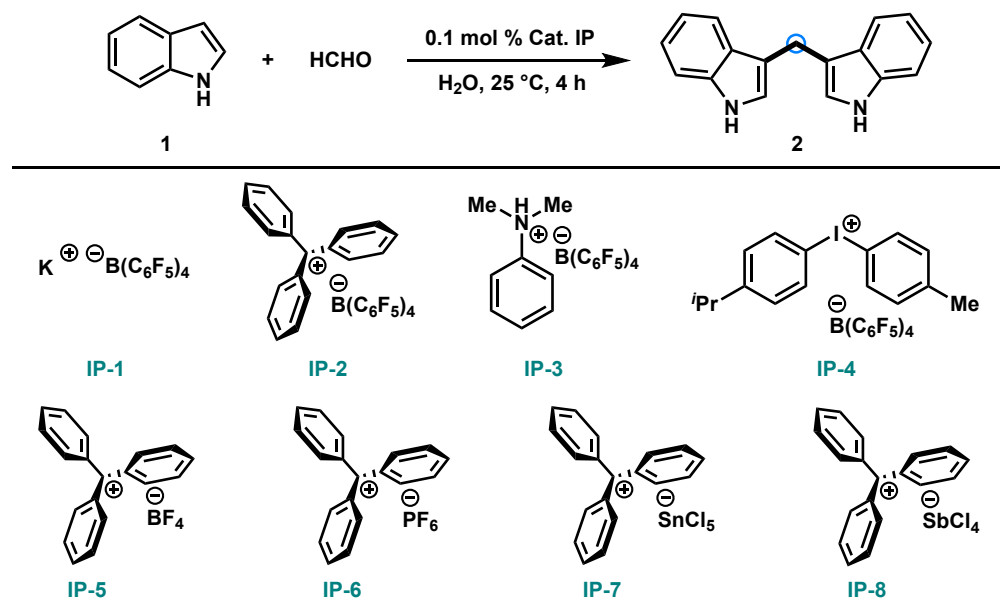

| Entry | Cat. | <b>2</b> Yield (%) <sup>a</sup> |
|-------|------|---------------------------------|
| 1     | --   | n.d.                            |
| 2     | IP-1 | 5                               |
| 3     | IP-2 | 41                              |
| 4     | IP-3 | 11                              |
| 5     | IP-4 | 9                               |
| 6     | IP-5 | 10                              |
| 7     | IP-6 | 13                              |
| 8     | IP-7 | 15                              |
| 9     | IP-8 | 15                              |

Reactions were performed on 0.5 mmol scale in 2.0 mL deionized H<sub>2</sub>O. <sup>a</sup>Yield based on **1** and was determined by GC analysis by using anisole as an internal standard. n.d.: not detected.

**Table S2. Screening reaction temperature.**

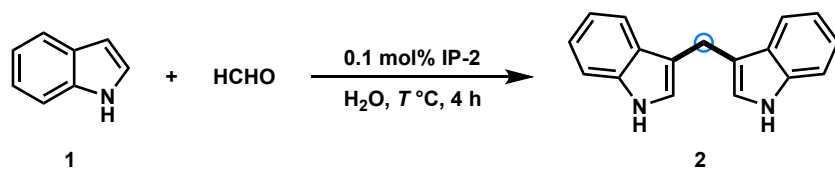

| Entry | T (°C) | 2 Yield (%) <sup>a</sup> |
|-------|--------|--------------------------|
| 1     | 30     | 42                       |
| 2     | 40     | 62                       |
| 3     | 50     | 76                       |
| 4     | 60     | 80                       |
| 5     | 70     | 82                       |
| 6     | 80     | 86                       |
| 7     | 90     | 84                       |

Reactions were performed on 0.5 mmol scale in 2.0 mL deionized H<sub>2</sub>O. <sup>a</sup>Yield based on **1** and was determined by GC analysis by using anisole as an internal standard.

**Table S3. Screening loading of catalyst.**

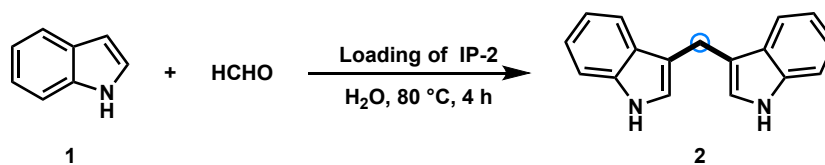

| Entry | Loading of Cat. IP-2 (%) | <b>3</b> Yield (%) <sup>a</sup> |
|-------|--------------------------|---------------------------------|
| 1     | 0.05                     | 62                              |
| 2     | 0.06                     | 65                              |
| 3     | 0.07                     | 68                              |
| 4     | 0.08                     | 84                              |
| 5     | 0.09                     | 86                              |
| 6     | 0.1                      | 88                              |

Reactions were performed on 0.5 mmol scale in 2.0 mL deionized H<sub>2</sub>O. <sup>a</sup>Yield based on **1** and was determined by GC analysis by using anisole as an internal standard.

**Table S4. Screening reaction time.**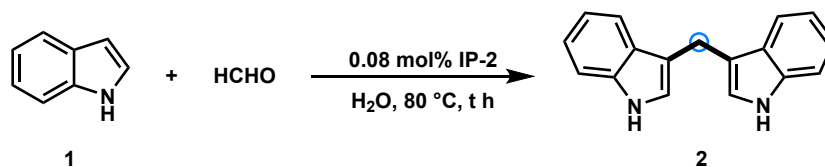

| Entry | t (h) | <b>2</b> Yield (%) <sup>a</sup> |
|-------|-------|---------------------------------|
| 1     | 1     | 72                              |
| 2     | 2     | 77                              |
| 3     | 4     | 84                              |
| 4     | 6     | 92                              |
| 5     | 8     | 99 (98) <sup>b</sup>            |
| 6     | 10    | 99                              |
| 7     | 12    | 98                              |

Reactions were performed on 0.5 mmol scale in 2.0 mL deionized H<sub>2</sub>O. <sup>a</sup>Yield based on **1** and was determined by GC analysis by using anisole as an internal standard. <sup>b</sup>Isolated yield.

**Table S5. Screening the volume of H<sub>2</sub>O.**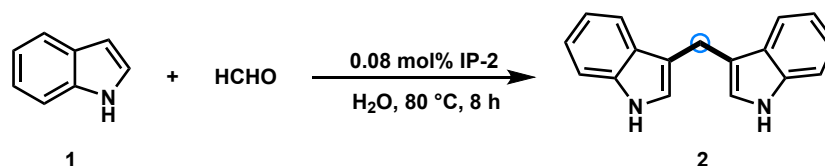

| Entry | Volume of H <sub>2</sub> O (mL) | <b>2</b> Yield (%) <sup>a</sup> |
|-------|---------------------------------|---------------------------------|
| 1     | 0.5                             | 92                              |
| 2     | 1.0                             | 97                              |
| 3     | 1.5                             | 98                              |
| 4     | 2.0                             | 98                              |
| 5     | 2.5                             | 99 (98) <sup>b</sup>            |
| 6     | 3.0                             | 99                              |

Reactions were performed on 0.5 mmol scale in deionized H<sub>2</sub>O. <sup>a</sup>Yield based on **1** and was determined by GC analysis by using anisole as an internal standard. <sup>b</sup>Isolated yield.

## 6. Synthetic application

### Scheme S1: 100 gram-scale synthesis of Arundine

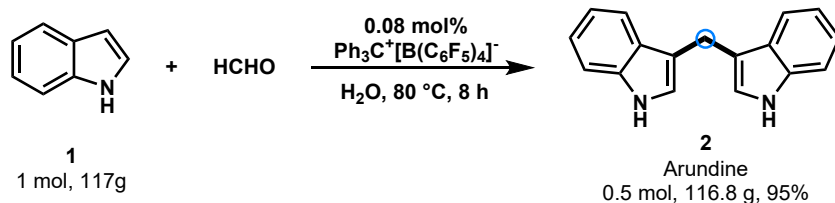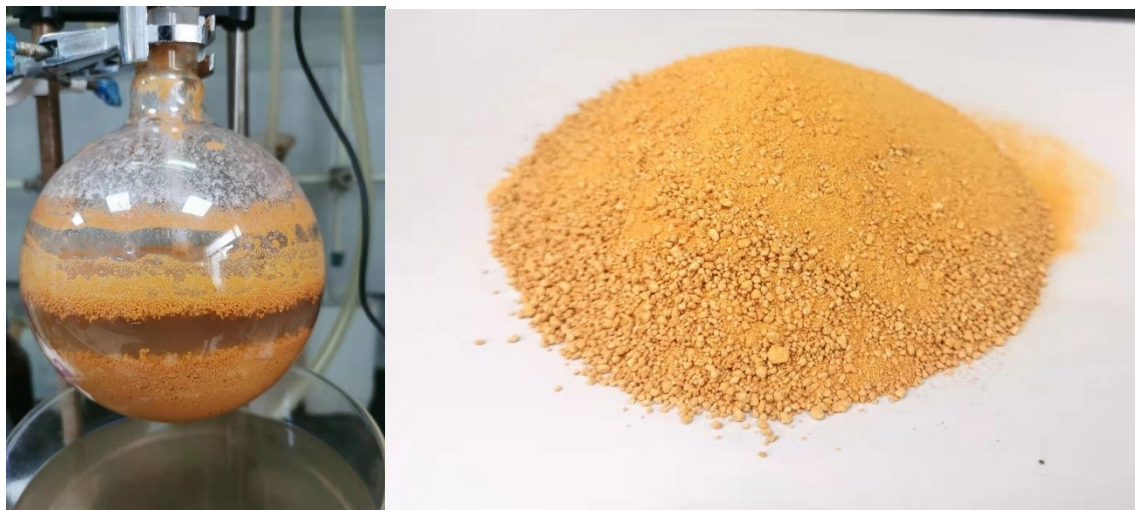

**Procedure for the 100 gram-scale synthesis of Arundine:** To a 1000 mL well-dried round bottom flask equipped with a mechanical stir bar,  $\text{Ph}_3\text{C}^+[\text{B}(\text{C}_6\text{F}_5)_4]^-$  (720 mg), indole (117 g, 1 mol, 1.0 equiv.), formaldehydes in water (37% w/w, 50 mL, 0.6 mol, 0.6 equiv.) were added. Then, 200 mL pure water was added. The mixture was heated in an oil bath at 80 °C and stirred vigorously for 8 hours. When the reaction was complete, the mixture was filtered through Buchner funnel, and the residue was washed with PE (200 mL). The residue was further purified by recrystallization in PE/EA (5:1) to obtain the product (yellow solid, 116.8 g, 95%).

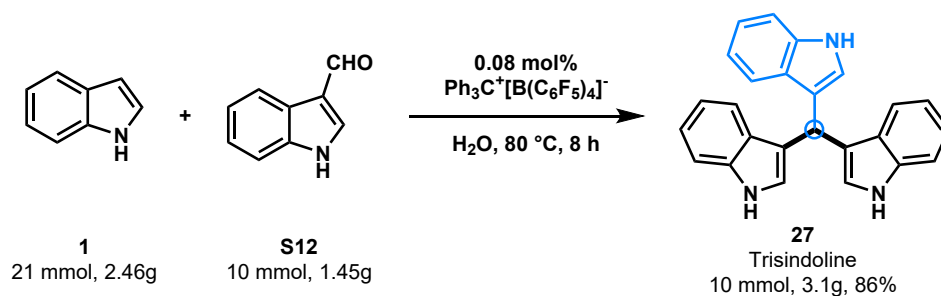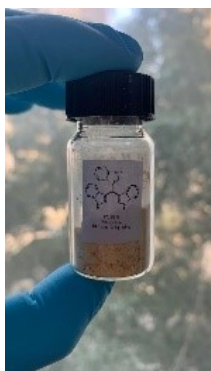

**Procedure for the gram-scale synthesis of Trisindoline:** To a 100 mL well-dried round bottom flask equipped with a magnetic stir bar,  $\text{Ph}_3\text{C}^+[\text{B}(\text{C}_6\text{F}_5)_4]^-$  (184.5 mg, 0.008 mmol), indole (2.46 g, 21 mmol), indole-3-carboxaldehyde (1.45 g, 10 mmol) were added. Then, 20 mL pure water was added. The mixture was heated in an oil bath at 80 °C and stirred vigorously for 8 hours. When the reaction was complete, the mixture was filtered through Buchner funnel, and the residue was washed with PE (50 mL). The residue was further purified by recrystallization in EA to obtain the product (yellowish solid, 3.1 g, 86%).

## 7. Mechanistic studies

### 7.1 Comparison with other Brønsted acids

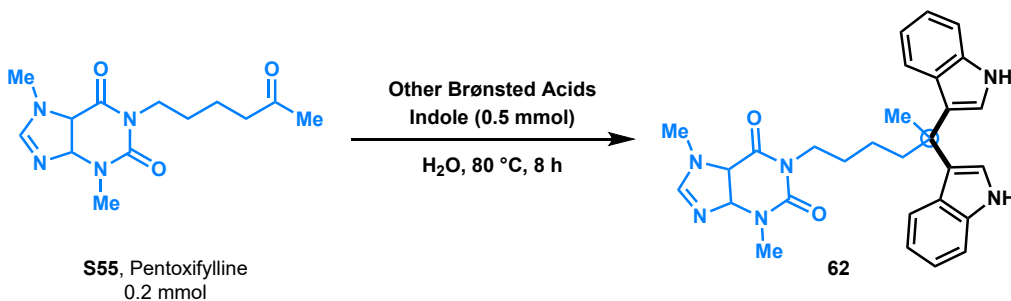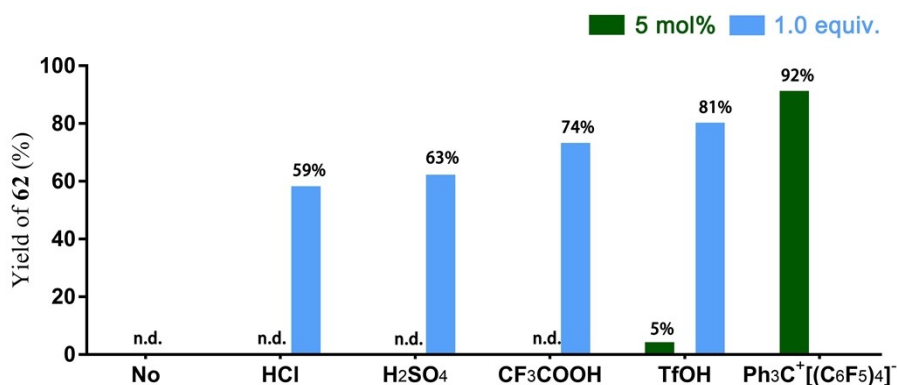

**Procedure:** To an over-dried reaction tube (25 mL) equipped with a magnetic stir bar, pentoxifylline (55.6 mg, 0.2 mmol), indole (58.5 mg, 0.5 mmol) and Brønsted acids (0.01 M pre-stored solution in H<sub>2</sub>O, 5 mol% or 1 equiv.) were added. Then, 2.5 mL pure water was charged *via* syringe. The resulting solution was heated in an oil bath at 80 °C and stirred vigorously for 8 h. When the reaction was complete, the mixture was diluted with EA (1 mL), filtered through a short pad of silica gel, and washed with EA (3×5 mL). The filtrate was concentrated under reduced pressure and the residue was analyzed by <sup>1</sup>H NMR.



## 7.2 Hydrolysis of $\text{Ph}_3^+[\text{B}(\text{C}_6\text{F}_5)_4]^-$ in $\text{H}_2\text{O}$

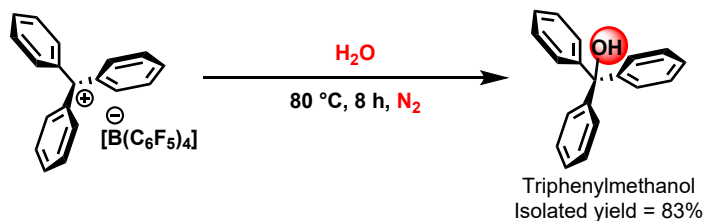

**Procedure:** To an over-dried Schlenk tube (25 mL) equipped with a magnetic stir bar,  $\text{Ph}_3^+[\text{B}(\text{C}_6\text{F}_5)_4]^-$  (36.8 mg, 0.04 mmol) was added. Then, 2.5 mL pure water was charged *via* syringe. The resulting solution was heated in an oil bath at  $80\text{ }^\circ\text{C}$  and stirred vigorously for 8 h. When the reaction was complete, the mixture was diluted with EA (1 mL), filtered through a short pad of silica gel, and washed with EA (10 mL). The filtrate was concentrated under reduced pressure, and the residue was purified by silica gel column chromatography (PE/EA, 20/1, v/v) to give triphenylmethanol as a white solid, 8.6 mg, 83%.  $^1\text{H NMR}$  (400 MHz,  $\text{CDCl}_3$ -*d*)  $\delta$  7.35 - 7.22 (m, 15H), 2.86 (s, 1H).  $^{13}\text{C NMR}$  (101 MHz,  $\text{CDCl}_3$ -*d*)  $\delta$  146.95, 128.04, 128.05, 127.39, 82.12.

### 7.3 Proton scavenging experiment

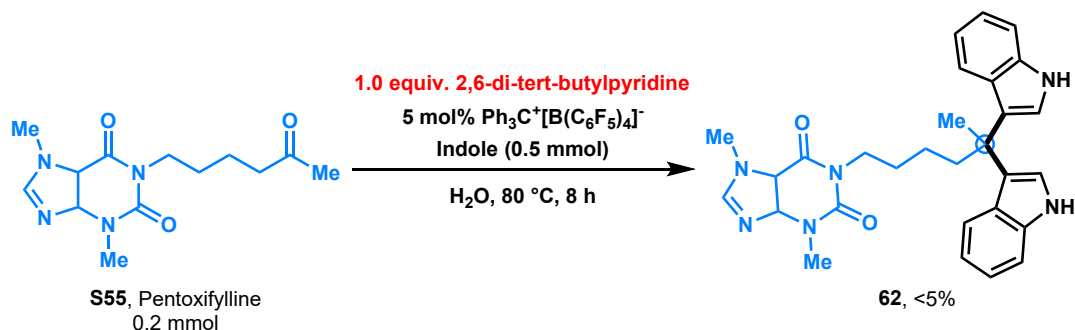

**Procedure:** To an over-dried reaction tube (25 mL) equipped with a magnetic stir bar, pentoxifylline (0.2 mmol, 55.6 mg), indole (58.5 mg, 0.5 mmol), 2,6-di-tert-butylpyridine (38.2 mg, 0.2 mmol) and  $\text{Ph}_3\text{C}^+[\text{B}(\text{C}_6\text{F}_5)_4]^-$  (5 mol%, 9.2 mg, 0.01 mmol) were added. Then, 2.5 mL pure water was charged *via* syringe. The resulting solution was heated in an oil bath at 80 °C and stirred vigorously for 8 h. When the reaction was complete, the mixture was diluted with EA (1 mL), filtered through a short pad of silica gel, and washed with EA (3×5 mL). The filtrate was concentrated under reduced pressure and the residue was analyzed by  $^1\text{H}$  NMR.

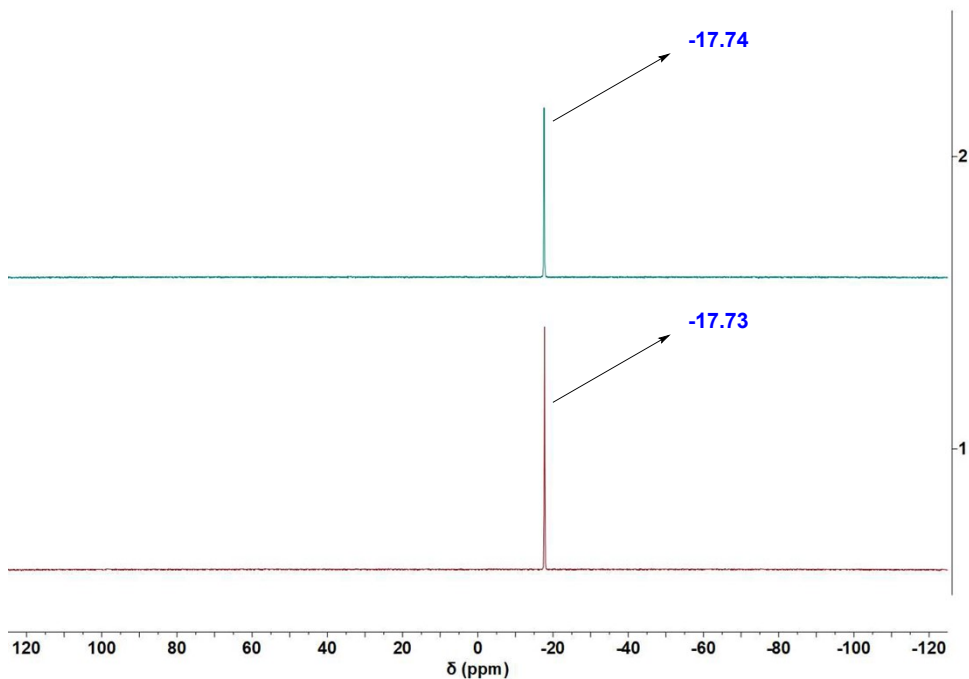

Figure S4.  $^{11}\text{B}$ -NMR (400 MHz,  $\text{CDCl}_3$ -*d*) spectra of  $\text{Ph}_3^+[\text{B}(\text{C}_6\text{F}_5)_4]^-$  before and after reaction under standard conditions.

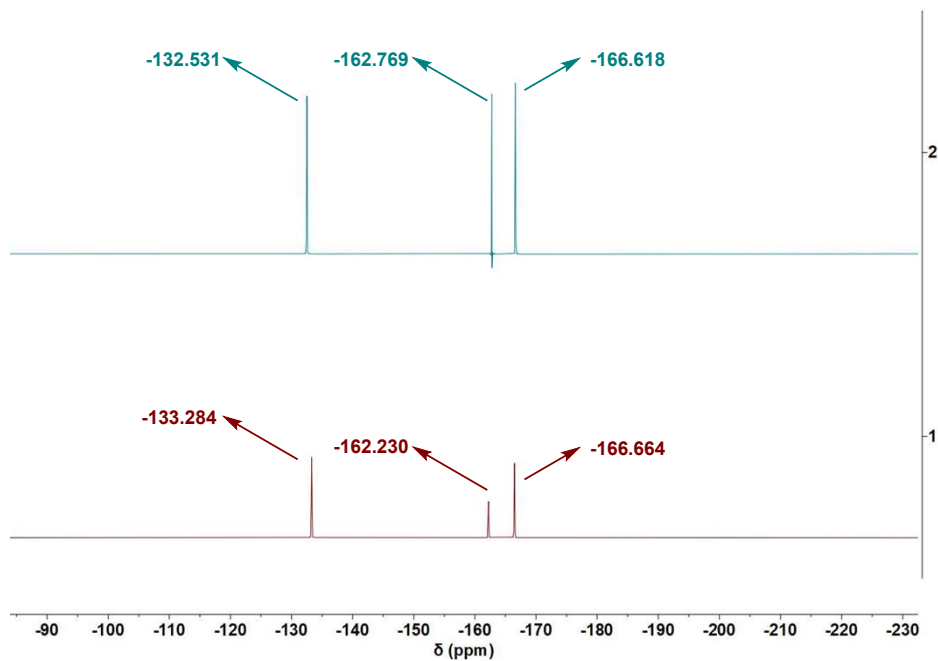

Figure S5.  $^{19}\text{F}$ -NMR (400 MHz,  $\text{CDCl}_3$ -*d*) spectra of  $\text{Ph}_3^+[\text{B}(\text{C}_6\text{F}_5)_4]^-$  before and after reaction under standard conditions.

## 8. X-ray data of compound 53

**Table S5 Crystal data and structure refinement for 53.**

|                                             |                                                               |
|---------------------------------------------|---------------------------------------------------------------|
| Identification code                         | <b>53</b>                                                     |
| Empirical formula                           | C <sub>21</sub> H <sub>24</sub> N <sub>2</sub> O <sub>5</sub> |
| Formula weight                              | 384.42                                                        |
| Temperature/K                               | 170.00(10)                                                    |
| Crystal system                              | monoclinic                                                    |
| Space group                                 | P2 <sub>1</sub>                                               |
| a/Å                                         | 6.4858(3)                                                     |
| b/Å                                         | 10.2602(5)                                                    |
| c/Å                                         | 14.1368(6)                                                    |
| α/°                                         | 90                                                            |
| β/°                                         | 96.740(4)                                                     |
| γ/°                                         | 90                                                            |
| Volume/Å <sup>3</sup>                       | 934.24(7)                                                     |
| Z                                           | 2                                                             |
| ρ <sub>calc</sub> /cm <sup>3</sup>          | 1.367                                                         |
| μ/mm <sup>-1</sup>                          | 0.807                                                         |
| F(000)                                      | 408.0                                                         |
| Crystal size/mm <sup>3</sup>                | 0.14 × 0.12 × 0.11                                            |
| Radiation                                   | Cu Kα (λ = 1.54184)                                           |
| 2θ range for data collection/°              | 6.296 to 142.916                                              |
| Index ranges                                | -5 ≤ h ≤ 7, -12 ≤ k ≤ 12, -17 ≤ l ≤ 14                        |
| Reflections collected                       | 5076                                                          |
| Independent reflections                     | 2956 [R <sub>int</sub> = 0.0204, R <sub>sigma</sub> = 0.0281] |
| Data/restraints/parameters                  | 2956/1/267                                                    |
| Goodness-of-fit on F <sup>2</sup>           | 1.195                                                         |
| Final R indexes [I ≥ 2σ (I)]                | R <sub>1</sub> = 0.0464, wR <sub>2</sub> = 0.1350             |
| Final R indexes [all data]                  | R <sub>1</sub> = 0.0510, wR <sub>2</sub> = 0.1470             |
| Largest diff. peak/hole / e Å <sup>-3</sup> | 0.24/-0.32                                                    |
| Flack parameter                             | 0.0(3)                                                        |

### Crystal structure determination of [53]

**Crystal Data** for C<sub>21</sub>H<sub>24</sub>N<sub>2</sub>O<sub>5</sub> (*M* = 384.42 g/mol): monoclinic, space group P2<sub>1</sub> (no. 4), *a* = 6.4858(3) Å, *b* = 10.2602(5) Å, *c* = 14.1368(6) Å, β = 96.740(4)°, *V* = 934.24(7) Å<sup>3</sup>, *Z* = 2, *T* = 170.00(10) K, μ(Cu Kα) = 0.807 mm<sup>-1</sup>, *D*<sub>calc</sub> = 1.367 g/cm<sup>3</sup>, 5076 reflections measured (6.296° ≤ 2θ ≤ 142.916°), 2956 unique (*R*<sub>int</sub> = 0.0204, *R*<sub>sigma</sub> = 0.0281) which were used in all calculations. The final *R*<sub>1</sub> was 0.0464 (*I* > 2σ(*I*)) and *wR*<sub>2</sub> was 0.1470 (all data).

### Refinement model description

**Table S6 Fractional Atomic Coordinates ( $\times 10^4$ ) and Equivalent Isotropic Displacement Parameters ( $\text{\AA}^2 \times 10^3$ ) for 53.  $U_{\text{eq}}$  is defined as 1/3 of the trace of the orthogonalised  $U_{ij}$  tensor.**

| Atom | x        | y       | z       | U(eq)    |
|------|----------|---------|---------|----------|
| O1   | 7323(5)  | 7223(4) | 2915(2) | 30.6(8)  |
| O2   | 3575(5)  | 6885(3) | 4569(2) | 28.5(8)  |
| O3   | 7509(5)  | 6866(4) | 5793(2) | 27.7(8)  |
| O4   | 8296(5)  | 9564(3) | 5303(2) | 30.3(8)  |
| O5   | 11202(5) | 9222(4) | 4130(3) | 41.2(10) |
| N1   | 8535(6)  | 3074(4) | 3124(3) | 29.3(9)  |
| N2   | 4276(6)  | 6404(5) | -13(3)  | 33.8(10) |
| C1   | 5190(7)  | 3137(5) | 2491(3) | 22.8(10) |
| C2   | 3316(8)  | 2591(5) | 2085(3) | 27.5(10) |
| C3   | 3176(9)  | 1253(5) | 1975(4) | 33.3(12) |
| C4   | 4883(9)  | 446(5)  | 2261(3) | 36.1(13) |
| C5   | 6746(9)  | 953(5)  | 2655(3) | 34.5(12) |
| C6   | 6894(7)  | 2296(5) | 2770(3) | 26.8(10) |
| C7   | 7903(7)  | 4356(5) | 3080(3) | 27.4(10) |
| C8   | 5866(7)  | 4455(5) | 2705(3) | 23.2(10) |
| C9   | 4503(7)  | 5649(5) | 2571(3) | 23.0(10) |
| C10  | 5344(6)  | 6823(5) | 3165(3) | 22.3(9)  |
| C11  | 5517(7)  | 6564(5) | 4245(3) | 23.5(10) |
| C12  | 7200(7)  | 7345(4) | 4828(3) | 20.8(9)  |
| C13  | 6672(7)  | 8789(5) | 4822(3) | 27.5(11) |
| C14  | 4040(7)  | 6069(5) | 1545(3) | 24.6(10) |
| C15  | 5104(8)  | 5755(5) | 793(3)  | 31.9(11) |
| C16  | 2653(7)  | 7168(5) | 202(3)  | 26.1(10) |
| C17  | 2463(6)  | 6988(5) | 1180(3) | 22.6(9)  |
| C18  | 917(7)   | 7678(5) | 1583(3) | 26.4(10) |
| C19  | -362(8)  | 8507(6) | 1020(4) | 32.7(11) |
| C20  | -134(8)  | 8678(6) | 49(4)   | 33.3(11) |
| C21  | 1359(8)  | 8008(6) | -368(3) | 32.7(11) |

**Table S7 Anisotropic Displacement Parameters ( $\text{\AA}^2 \times 10^3$ ) for 53. The Anisotropic displacement factor exponent takes the form:  $-2\pi^2[h^2a^*2U_{11}+2hka^*b^*U_{12}+\dots]$ .**

| Atom | $U_{11}$ | $U_{22}$ | $U_{33}$ | $U_{23}$ | $U_{13}$ | $U_{12}$ |
|------|----------|----------|----------|----------|----------|----------|
| O1   | 35.1(18) | 36(2)    | 20.8(17) | -3.4(16) | 4.6(14)  | -9.6(15) |
| O2   | 29.6(16) | 28.8(18) | 28.3(16) | -0.2(15) | 7.9(13)  | -0.7(15) |
| O3   | 33.4(17) | 32(2)    | 17.6(15) | 1.2(14)  | 1.1(13)  | 2.2(16)  |
| O4   | 26.0(16) | 27.1(19) | 36.7(19) | -8.5(15) | -1.5(14) | -2.6(14) |

**Table S7 Anisotropic Displacement Parameters ( $\text{\AA}^2 \times 10^3$ ) for 53. The Anisotropic displacement factor exponent takes the form:  $-2\pi^2[h^2a^*^2U_{11}+2hka^*b^*U_{12}+\dots]$ .**

| Atom | $U_{11}$ | $U_{22}$ | $U_{33}$ | $U_{23}$ | $U_{13}$ | $U_{12}$ |
|------|----------|----------|----------|----------|----------|----------|
| O5   | 31.2(19) | 33(2)    | 60(3)    | -3(2)    | 6.2(18)  | -0.5(16) |
| N1   | 26.2(19) | 33(2)    | 27(2)    | -0.8(18) | -2.6(16) | 7.1(18)  |
| N2   | 39(2)    | 44(3)    | 19.2(19) | 1.3(18)  | 6.9(17)  | 11(2)    |
| C1   | 27(2)    | 24(2)    | 17(2)    | 0.5(18)  | 1.8(17)  | -0.2(19) |
| C2   | 32(2)    | 28(3)    | 22(2)    | 0.2(19)  | 0.5(18)  | -0.8(19) |
| C3   | 45(3)    | 31(3)    | 24(2)    | -1(2)    | 5(2)     | -10(2)   |
| C4   | 60(4)    | 23(3)    | 26(2)    | 2(2)     | 9(2)     | 1(2)     |
| C5   | 49(3)    | 29(3)    | 26(2)    | 6(2)     | 5(2)     | 8(2)     |
| C6   | 33(2)    | 32(3)    | 16(2)    | 0(2)     | 3.2(18)  | 2(2)     |
| C7   | 30(2)    | 26(3)    | 25(2)    | -5(2)    | -0.8(18) | 4(2)     |
| C8   | 25(2)    | 24(3)    | 19(2)    | 0.9(19)  | 0.8(17)  | -2.4(19) |
| C9   | 22(2)    | 27(2)    | 19(2)    | 0.4(18)  | -0.8(17) | -3.6(18) |
| C10  | 24(2)    | 22(2)    | 20(2)    | 0.0(19)  | 0.1(16)  | -2.5(19) |
| C11  | 27(2)    | 23(3)    | 20(2)    | -0.6(18) | 3.0(17)  | -0.1(18) |
| C12  | 28(2)    | 18(2)    | 16(2)    | -2.3(17) | 1.7(16)  | 5.1(18)  |
| C13  | 25(2)    | 27(3)    | 28(2)    | -7(2)    | -4.9(19) | 0.9(19)  |
| C14  | 24(2)    | 28(3)    | 21(2)    | 1.5(19)  | -0.6(17) | -2.9(19) |
| C15  | 31(2)    | 39(3)    | 25(2)    | 2(2)     | -0.2(19) | 8(2)     |
| C16  | 30(2)    | 29(3)    | 19(2)    | 1(2)     | -0.7(18) | 0(2)     |
| C17  | 23(2)    | 22(2)    | 22(2)    | -1.0(19) | -0.4(16) | 0.6(18)  |
| C18  | 28(2)    | 32(3)    | 19(2)    | 1.1(19)  | 1.1(17)  | -2(2)    |
| C19  | 31(3)    | 36(3)    | 31(3)    | -1(2)    | 0(2)     | 3(2)     |
| C20  | 34(3)    | 32(3)    | 32(2)    | 1(2)     | -6(2)    | 7(2)     |
| C21  | 39(3)    | 38(3)    | 20(2)    | 3(2)     | -3(2)    | 0(2)     |

**Table S8 Bond Lengths for 53.**

| Atom | Atom | Length/ $\text{\AA}$ | Atom | Atom | Length/ $\text{\AA}$ |
|------|------|----------------------|------|------|----------------------|
| O1   | C10  | 1.431(5)             | C7   | C8   | 1.369(6)             |
| O2   | C11  | 1.429(5)             | C8   | C9   | 1.509(7)             |
| O3   | C12  | 1.442(5)             | C9   | C10  | 1.532(6)             |
| O4   | C13  | 1.426(6)             | C9   | C14  | 1.510(6)             |
| N1   | C6   | 1.377(6)             | C10  | C11  | 1.540(6)             |
| N1   | C7   | 1.378(6)             | C11  | C12  | 1.517(6)             |
| N2   | C15  | 1.373(6)             | C12  | C13  | 1.521(7)             |
| N2   | C16  | 1.374(6)             | C14  | C15  | 1.372(7)             |
| C1   | C2   | 1.399(7)             | C14  | C17  | 1.441(6)             |
| C1   | C6   | 1.421(7)             | C16  | C17  | 1.414(6)             |

**Table S8 Bond Lengths for 53.**

| Atom | Atom | Length/Å | Atom | Atom | Length/Å |
|------|------|----------|------|------|----------|
| C1   | C8   | 1.443(7) | C16  | C21  | 1.392(7) |
| C2   | C3   | 1.383(7) | C17  | C18  | 1.402(6) |
| C3   | C4   | 1.403(8) | C18  | C19  | 1.375(7) |
| C4   | C5   | 1.373(8) | C19  | C20  | 1.408(7) |
| C5   | C6   | 1.390(8) | C20  | C21  | 1.376(8) |

**Table S9 Bond Angles for 53.**

| Atom | Atom | Atom | Angle/°  | Atom | Atom | Atom | Angle/°  |
|------|------|------|----------|------|------|------|----------|
| C6   | N1   | C7   | 108.9(4) | O2   | C11  | C10  | 108.3(3) |
| C15  | N2   | C16  | 109.2(4) | O2   | C11  | C12  | 108.0(3) |
| C2   | C1   | C6   | 118.7(4) | C12  | C11  | C10  | 114.3(4) |
| C2   | C1   | C8   | 133.6(4) | O3   | C12  | C11  | 110.2(4) |
| C6   | C1   | C8   | 107.7(4) | O3   | C12  | C13  | 110.1(4) |
| C3   | C2   | C1   | 119.1(5) | C11  | C12  | C13  | 111.4(4) |
| C2   | C3   | C4   | 120.9(5) | O4   | C13  | C12  | 112.8(4) |
| C5   | C4   | C3   | 121.4(5) | C15  | C14  | C9   | 128.0(4) |
| C4   | C5   | C6   | 117.9(5) | C15  | C14  | C17  | 106.1(4) |
| N1   | C6   | C1   | 107.0(4) | C17  | C14  | C9   | 125.7(4) |
| N1   | C6   | C5   | 131.1(5) | C14  | C15  | N2   | 110.2(4) |
| C5   | C6   | C1   | 121.9(5) | N2   | C16  | C17  | 107.3(4) |
| C8   | C7   | N1   | 110.9(4) | N2   | C16  | C21  | 130.6(4) |
| C1   | C8   | C9   | 125.1(4) | C21  | C16  | C17  | 122.1(4) |
| C7   | C8   | C1   | 105.5(4) | C16  | C17  | C14  | 107.2(4) |
| C7   | C8   | C9   | 129.3(4) | C18  | C17  | C14  | 134.1(4) |
| C8   | C9   | C10  | 113.8(4) | C18  | C17  | C16  | 118.7(4) |
| C8   | C9   | C14  | 113.5(4) | C19  | C18  | C17  | 119.2(4) |
| C14  | C9   | C10  | 108.7(4) | C18  | C19  | C20  | 121.1(5) |
| O1   | C10  | C9   | 111.2(4) | C21  | C20  | C19  | 121.0(5) |
| O1   | C10  | C11  | 109.4(3) | C20  | C21  | C16  | 117.9(5) |
| C9   | C10  | C11  | 112.8(4) |      |      |      |          |

**Table S10 Torsion Angles for 53.**

| A  | B   | C   | D   | Angle/°  | A  | B  | C   | D   | Angle/°   |
|----|-----|-----|-----|----------|----|----|-----|-----|-----------|
| O1 | C10 | C11 | O2  | 148.0(4) | C8 | C1 | C6  | C5  | -179.9(4) |
| O1 | C10 | C11 | C12 | 27.5(5)  | C8 | C9 | C10 | O1  | 61.1(5)   |
| O2 | C11 | C12 | O3  | 70.2(4)  | C8 | C9 | C10 | C11 | -62.2(5)  |

**Table S10 Torsion Angles for 53.**

| A  | B   | C   | D   | Angle/°   | A   | B   | C   | D   | Angle/°   |
|----|-----|-----|-----|-----------|-----|-----|-----|-----|-----------|
| O2 | C11 | C12 | C13 | -52.3(5)  | C8  | C9  | C14 | C15 | -19.6(7)  |
| O3 | C12 | C13 | O4  | 62.0(5)   | C8  | C9  | C14 | C17 | 166.2(4)  |
| N1 | C7  | C8  | C1  | -0.6(5)   | C9  | C10 | C11 | O2  | -87.7(5)  |
| N1 | C7  | C8  | C9  | 176.5(4)  | C9  | C10 | C11 | C12 | 151.9(4)  |
| N2 | C16 | C17 | C14 | -0.5(5)   | C9  | C14 | C15 | N2  | -175.8(5) |
| N2 | C16 | C17 | C18 | 179.3(4)  | C9  | C14 | C17 | C16 | 176.0(4)  |
| N2 | C16 | C21 | C20 | -178.7(5) | C9  | C14 | C17 | C18 | -3.7(9)   |
| C1 | C2  | C3  | C4  | -0.3(8)   | C10 | C9  | C14 | C15 | 108.2(6)  |
| C1 | C8  | C9  | C10 | 159.2(4)  | C10 | C9  | C14 | C17 | -66.0(6)  |
| C1 | C8  | C9  | C14 | -75.8(6)  | C10 | C11 | C12 | O3  | -169.2(4) |
| C2 | C1  | C6  | N1  | 178.7(4)  | C10 | C11 | C12 | C13 | 68.3(5)   |
| C2 | C1  | C6  | C5  | -0.5(7)   | C11 | C12 | C13 | O4  | -175.5(4) |
| C2 | C1  | C8  | C7  | -178.5(5) | C14 | C9  | C10 | O1  | -66.5(5)  |
| C2 | C1  | C8  | C9  | 4.2(8)    | C14 | C9  | C10 | C11 | 170.2(4)  |
| C2 | C3  | C4  | C5  | -0.2(8)   | C14 | C17 | C18 | C19 | 179.6(5)  |
| C3 | C4  | C5  | C6  | 0.3(7)    | C15 | N2  | C16 | C17 | 0.0(6)    |
| C4 | C5  | C6  | N1  | -178.9(4) | C15 | N2  | C16 | C21 | 179.1(5)  |
| C4 | C5  | C6  | C1  | 0.0(7)    | C15 | C14 | C17 | C16 | 0.7(5)    |
| C6 | N1  | C7  | C8  | 0.1(6)    | C15 | C14 | C17 | C18 | -179.0(5) |
| C6 | C1  | C2  | C3  | 0.6(7)    | C16 | N2  | C15 | C14 | 0.4(6)    |
| C6 | C1  | C8  | C7  | 0.8(5)    | C16 | C17 | C18 | C19 | -0.1(7)   |
| C6 | C1  | C8  | C9  | -176.5(4) | C17 | C14 | C15 | N2  | -0.7(6)   |
| C7 | N1  | C6  | C1  | 0.4(5)    | C17 | C16 | C21 | C20 | 0.2(7)    |
| C7 | N1  | C6  | C5  | 179.5(5)  | C17 | C18 | C19 | C20 | -0.4(8)   |
| C7 | C8  | C9  | C10 | -17.4(7)  | C18 | C19 | C20 | C21 | 0.8(8)    |
| C7 | C8  | C9  | C14 | 107.7(5)  | C19 | C20 | C21 | C16 | -0.7(8)   |
| C8 | C1  | C2  | C3  | 179.8(5)  | C21 | C16 | C17 | C14 | -179.6(5) |
| C8 | C1  | C6  | N1  | -0.7(5)   | C21 | C16 | C17 | C18 | 0.1(7)    |

**Table S11 Hydrogen Atom Coordinates ( $\text{\AA} \times 10^4$ ) and Isotropic Displacement Parameters ( $\text{\AA}^2 \times 10^3$ ) for 53.**

| Atom | x        | y       | z       | U(eq) |
|------|----------|---------|---------|-------|
| H2   | 2935.21  | 6213.61 | 4653.64 | 43    |
| H4   | 9342.88  | 9490.65 | 5033.12 | 45    |
| H5A  | 11942.82 | 9896.26 | 4081.26 | 62    |
| H5B  | 11982.53 | 8555.68 | 4215.36 | 62    |
| H1A  | 9756.31  | 2803.11 | 3337.65 | 35    |
| H2A  | 4704.86  | 6342.98 | -563.79 | 41    |



**Table S11 Hydrogen Atom Coordinates ( $\text{\AA} \times 10^4$ ) and Isotropic Displacement Parameters ( $\text{\AA}^2 \times 10^3$ ) for 53.**

| Atom | <i>x</i>  | <i>y</i> | <i>z</i> | U(eq)  |
|------|-----------|----------|----------|--------|
| H2B  | 2180.37   | 3119.77  | 1890.89  | 33     |
| H3A  | 1933.05   | 882.75   | 1707.35  | 40     |
| H4A  | 4748.69   | -451.17  | 2181     | 43     |
| H5   | 7874.66   | 413.79   | 2840.72  | 41     |
| H7   | 8747.15   | 5060.67  | 3279.39  | 33     |
| H9   | 3170.87   | 5417.3   | 2789.54  | 28     |
| H10  | 4373.26   | 7547.38  | 3022.94  | 27     |
| H11  | 5789.59   | 5634.03  | 4358.14  | 28     |
| H12  | 8498.48   | 7233.61  | 4545.48  | 25     |
| H13A | 6390.83   | 9084.42  | 4167.8   | 33     |
| H13B | 5419.69   | 8914.41  | 5124.75  | 33     |
| H15  | 6224.04   | 5184.47  | 824.54   | 38     |
| H18  | 758.31    | 7577.03  | 2224.42  | 32     |
| H19  | -1393.77  | 8962.29  | 1284.27  | 39     |
| H20  | -1007.19  | 9252.36  | -315.57  | 40     |
| H21  | 1500.41   | 8113.35  | -1010.77 | 39     |
| H3   | 6330(80)  | 6920(50) | 6060(30) | 21(12) |
| H1   | 7240(100) | 7210(80) | 2370(50) | 60(20) |

### Experimental

Single crystals of  $\text{C}_{21}\text{H}_{24}\text{N}_2\text{O}_5$  [53]: A suitable crystal was selected on a **XtaLAB AFC12 (RINC): Kappa single** diffractometer. The crystal was kept at 170.00(10) K during data collection. Using Olex2, the structure was solved with the SHELXT structure solution program using Intrinsic Phasing and refined with the SHELXL refinement package using Least Squares minimisation.

## 9. Compound characterization data

### 3,3'-bisindolylmethane (Arundine) 2

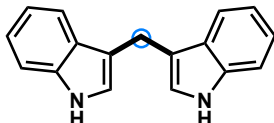

As a brown solid:  $R_f$  0.3 (PE: EA = 5:1);  $^1\text{H NMR}$  (400 MHz,  $\text{CDCl}_3$ )  $\delta$  7.86 (s, 2H), 7.64 (d,  $J = 7.8$  Hz, 2H), 7.36 (d,  $J = 8.1$  Hz, 2H), 7.21 (t,  $J = 7.6$  Hz, 2H), 7.11 (t,  $J = 7.8$  Hz, 2H), 6.92 (d,  $J = 1.9$  Hz, 2H), 4.26 (s, 2H).  $^{13}\text{C NMR}$  (101 MHz,  $\text{CDCl}_3$ )  $\delta$  136.54, 127.66, 122.31, 121.99, 119.32, 119.27, 115.76, 111.15, 77.45, 77.13, 76.82, 21.30. Data in accordance with the literature.<sup>9</sup>

### bis(4-methyl-1H-indol-3-yl)methane 3

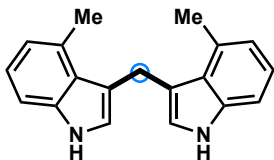

As a milky solid:  $R_f$  0.32 (PE: EA = 5:1);  $^1\text{H NMR}$  (400 MHz,  $\text{CDCl}_3$ )  $\delta$  7.80 (s, 2H), 7.19 (d,  $J = 8.1$  Hz, 2H), 7.10 (t,  $J = 7.7$  Hz, 2H), 6.87 (d,  $J = 7.5$  Hz, 2H), 6.67 (s, 2H), 4.57 (s, 2H), 2.68 (s, 6H).  $^{13}\text{C NMR}$  (101 MHz,  $\text{CDCl}_3$ )  $\delta$  137.08, 131.44, 126.01, 123.08, 122.11, 120.82, 117.59, 109.12, 25.88, 20.21. Data in accordance with the literature.<sup>9</sup>

### bis(5-methyl-1H-indol-3-yl)methane 4

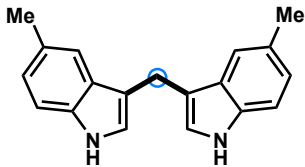

As a milky solid:  $R_f$  0.35 (PE: EA = 5:1);  $^1\text{H NMR}$  (400 MHz,  $\text{CDCl}_3$ )  $\delta$  7.82 (s, 2H), 7.25 (d,  $J = 1.6$  Hz, 1H), 7.23 (s, 1H), 7.06 (d,  $J = 2.5$  Hz, 2H), 6.90 (d,  $J = 2.3$  Hz, 2H), 6.85 (dd,  $J = 8.8, 2.5$  Hz, 2H), 4.16 (s, 2H), 3.81 (s, 6H), 2.17 (s, 1H).  $^{13}\text{C NMR}$  (101 MHz,  $\text{CDCl}_3$ )  $\delta$  134.88, 128.46, 127.87, 123.57, 122.56, 118.96, 115.23, 110.84, 21.65, 21.26. Data in accordance with the literature.<sup>9</sup>

#### bis(7-methyl-1H-indol-3-yl)methane 5

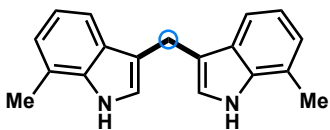

As a pale yellow solid:  $R_f$  0.40 (PE: EA = 5:1);  $^1\text{H NMR}$  (400 MHz,  $\text{CDCl}_3$ )  $\delta$  7.80 (s, 1H), 7.50 (t,  $J = 5.6$  Hz, 1H), 7.09 – 6.98 (m, 2H), 6.91 (d,  $J = 2.4$  Hz, 1H), 4.24 (d,  $J = 4.7$  Hz, 1H), 2.49 (d,  $J = 4.7$  Hz, 3H).  $^{13}\text{C NMR}$  (101 MHz,  $\text{CDCl}_3$ )  $\delta$  136.09, 127.18, 122.49, 122.03, 120.30, 119.48, 117.07, 116.32, 21.55, 16.73. Data in accordance with the literature.<sup>9</sup>

#### bis(6-methyl-1H-indol-3-yl)methane 6

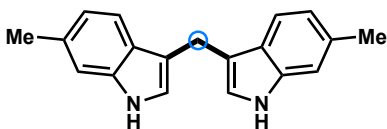

As a pale yellow solid:  $R_f$  0.38 (PE: EA = 5:1);  $^1\text{H NMR}$  (400 MHz,  $\text{CDCl}_3$ )  $\delta$  7.64 (s, 1H), 7.53 (d,  $J = 8.0$  Hz, 1H), 7.12 (s, 1H), 6.97 (dd,  $J = 8.0, 1.4$  Hz, 1H), 6.82 – 6.77 (m, 1H), 4.21 (s, 1H), 2.50 (s, 3H).  $^{13}\text{C NMR}$  (101 MHz,  $\text{CDCl}_3$ )  $\delta$  136.99, 131.72, 125.56, 121.69, 121.02, 119.01, 115.65, 111.16, 21.86, 21.40. Data in accordance with the literature.<sup>9</sup>

#### bis(5-methoxy-1H-indol-3-yl)methane 7

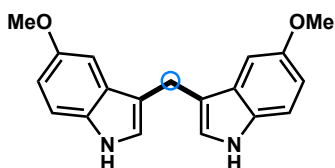

As a brown solid:  $R_f$  0.35 (PE: EA = 5:1);  $^1\text{H NMR}$  (400 MHz,  $\text{CDCl}_3$ )  $\delta$  7.70 (s, 2H), 7.46 (s, 2H), 7.24 (d,  $J = 8.3$  Hz, 2H), 7.06 (dd,  $J = 8.3, 1.7$  Hz, 2H), 6.83 (d,  $J = 2.3$  Hz, 2H), 4.21 (s, 2H), 2.48 (s, 6H).  $^{13}\text{C NMR}$  (101 MHz,  $\text{CDCl}_3$ )  $\delta$  153.89, 131.68, 127.99, 123.18, 115.33, 112.14, 111.90, 101.07, 56.02, 21.39. Data in accordance with the literature.<sup>9</sup>

#### bis(4-fluoro-1H-indol-3-yl)methane 8

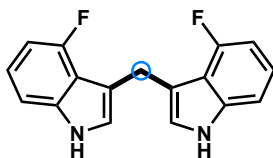

As a milky solid:  $R_f$  0.25 (PE: EA = 5:1);  $^1\text{H NMR}$  (400 MHz,  $\text{CDCl}_3$ )  $\delta$  7.94 (s, 2H), 7.12 – 7.02 (m, 4H), 6.94 (s, 2H), 6.75 (ddd,  $J = 11.1, 7.0, 1.6$  Hz, 2H), 4.44 (s, 2H).  $^{13}\text{C NMR}$  (101 MHz,  $\text{CDCl}_3$ )  $\delta$  156.29 (d,  $J = 222.4$  Hz), 139.29, 122.41, 122.34 (t,  $J = 2.2$

Hz), 116.19, 115.30 (d,  $J = 3.4$  Hz), 107.28 (d,  $J = 3.8$  Hz), 104.65, 23.32.  $^{19}\text{F}$  NMR (376 MHz,  $\text{CDCl}_3$ )  $\delta$  -122.80 (d,  $J = 11.7$  Hz). Data in accordance with the literature.<sup>9</sup>

### bis(6-fluoro-1H-indol-3-yl)methane 9

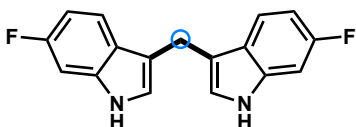

As a milky solid:  $R_f$  0.30 (PE: EA = 5:1);  $^1\text{H}$  NMR (400 MHz,  $\text{CDCl}_3$ )  $\delta$  8.09 (s, 2H), 7.37 (d,  $J = 7.9$  Hz, 2H), 7.02 (td,  $J = 7.8, 4.8$  Hz, 2H), 6.98 – 6.89 (m, 4H), 4.23 (s, 2H).  $^{13}\text{C}$  NMR (101 MHz,  $\text{CDCl}_3$ )  $\delta$  160.08 (d,  $J = 237.6$  Hz), 136.41 (d,  $J = 12.4$  Hz), 124.18, 122.46, 119.95 (d,  $J = 10.1$  Hz), 115.63, 108.08 (d,  $J = 24.5$  Hz), 97.46 (d,  $J = 26.1$  Hz), 21.33.  $^{19}\text{F}$  NMR (376 MHz,  $\text{CDCl}_3$ )  $\delta$  -121.11 – 121.40 (m). Data in accordance with the literature.<sup>9</sup>

### bis(5-fluoro-1H-indol-3-yl)methane 10

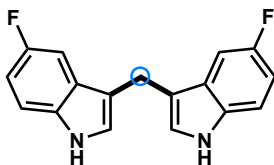

As a milky solid:  $R_f$  0.25 (PE: EA = 5:1);  $^1\text{H}$  NMR (400 MHz,  $\text{CDCl}_3$ )  $\delta$  7.91 (s, 2H), 7.25 (q,  $J = 4.5$  Hz, 2H), 7.20 (dd,  $J = 9.6, 2.5$  Hz, 2H), 7.00 (s, 2H), 6.92 (td,  $J = 9.1, 2.5$  Hz, 2H), 4.13 (s, 2H).  $^{13}\text{C}$  NMR (101 MHz,  $\text{CDCl}_3$ )  $\delta$  157.72 (d,  $J = 234.2$  Hz), 133.05, 127.89 (d,  $J = 9.8$  Hz), 124.02, 115.50 (d,  $J = 4.9$  Hz), 111.76 (d,  $J = 9.7$  Hz), 110.42 (d,

$J = 26.4$  Hz), 104.18 (d,  $J = 23.3$  Hz), 21.40.  $^{19}\text{F}$ NMR (376 MHz,  $\text{CDCl}_3$ )  $\delta$  -124.70.

Data in accordance with the literature.<sup>9</sup>

### bis(7-fluoro-1H-indol-3-yl)methane 11

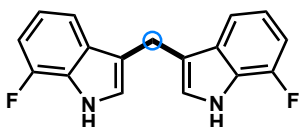

As a milky solid:  $R_f$  0.30 (PE: EA = 5:1);  $^1\text{H}$  NMR (400 MHz,  $\text{CDCl}_3$ )  $\delta$  8.09 (s, 2H), 7.37 (d,  $J = 7.9$  Hz, 2H), 7.02 (td,  $J = 7.8, 4.8$  Hz, 2H), 6.98 – 6.89 (m, 4H), 4.23 (s, 2H).  $^{13}\text{C}$  NMR (101 MHz,  $\text{CDCl}_3$ )  $\delta$  149.70 (d,  $J = 243.7$  Hz), 131.30 (d,  $J = 5.9$  Hz), 124.83 (d,  $J = 13.4$  Hz), 123.02 (d,  $J = 1.5$  Hz), 119.64 (d,  $J = 6.2$  Hz), 116.31 (d,  $J = 2.4$  Hz), 115.07 (d,  $J = 3.4$  Hz), 106.95 (d,  $J = 16.0$  Hz), 21.43.  $^{19}\text{F}$  NMR (376 MHz,  $\text{CDCl}_3$ )  $\delta$  -135.27, -135.28, -135.30, -135.31. Data in accordance with the literature.<sup>9</sup>

### bis(5-chloro-1H-indol-3-yl)methane 12

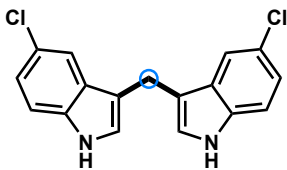

As a brown solid:  $R_f$  0.20 (PE: EA = 5:1);  $^1\text{H}$  NMR (400 MHz,  $\text{CDCl}_3$ )  $\delta$  7.96 (s, 2H), 7.54 (d,  $J = 1.9$  Hz, 2H), 7.26 (d,  $J = 8.6$  Hz, 2H), 7.14 (dd,  $J = 8.6, 2.0$  Hz, 2H), 6.96 (d,  $J = 2.4$  Hz, 2H), 4.14 (s, 2H).  $^{13}\text{C}$  NMR (101 MHz,  $\text{CDCl}_3$ )  $\delta$  134.91, 128.60, 125.07, 123.69, 122.38, 118.73, 115.04, 112.24, 21.20. Data in accordance with the literature.<sup>9</sup>

### bis(5-bromo-1H-indol-3-yl)methane 13

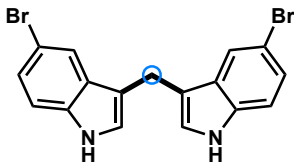

As a brown solid:  $R_f$  0.25 (PE: EA = 5:1);  $^1\text{H NMR}$  (400 MHz,  $\text{CDCl}_3$ )  $\delta$  7.97 (s, 1H), 7.69 (s, 1H), 7.24 (q,  $J = 8.6$  Hz, 2H), 6.93 (d,  $J = 2.3$  Hz, 1H), 4.12 (s, 1H).  $^{13}\text{C NMR}$  (101 MHz,  $\text{CDCl}_3$ )  $\delta$  135.16, 129.25, 124.93, 123.51, 121.83, 114.94, 112.68, 112.64, 21.19. Data in accordance with the literature.<sup>9</sup>

### 3,3'-methylenebis(1H-indole-5-carbonitrile) 14

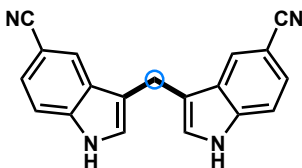

As a pale yellow solid:  $R_f$  0.3 (PE: EA = 2:1);  $^1\text{H NMR}$  (400 MHz,  $\text{DMSO-}d_6$ )  $\delta$  11.40 (s, 2H), 8.09 (s, 2H), 7.55 – 7.45 (m, 4H), 7.38 (dd,  $J = 8.5, 1.6$  Hz, 2H), 4.21 (s, 2H).  $^{13}\text{C NMR}$  (101 MHz,  $\text{DMSO-}d_6$ )  $\delta$  138.62, 127.36, 126.24, 124.93, 124.15, 121.47, 115.58, 113.22, 100.73, 20.68. Data in accordance with the literature.<sup>10</sup>

### dimethyl 3,3'-methylenebis(1H-indole-5-carboxylate) 15

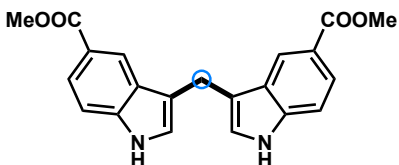

As a pale yellow solid:  $R_f$  0.4 (PE: EA = 2:1);  $^1\text{H NMR}$  (400 MHz,  $\text{DMSO-}d_6$ )  $\delta$  11.19 (s, 2H), 7.66 (d,  $J = 8.6$  Hz, 2H), 7.38 (d,  $J = 8.0$  Hz, 2H), 7.20 (s, 2H), 4.20 (s, 2H), 3.76 (s, 6H).  $^{13}\text{C NMR}$  (101 MHz,  $\text{DMSO-}d_6$ )  $\delta$  167.81, 139.58, 127.19, 125.29, 122.48, 121.83, 120.19, 115.95, 111.92, 52.13, 21.10. Data in accordance with the literature.<sup>10</sup>

### bis(2-phenyl-1H-indol-3-yl)methane 16

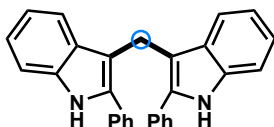

As a milky solid:  $R_f$  0.25 (PE: EA = 5:1);  $^1\text{H NMR}$  (400 MHz,  $\text{CDCl}_3$ )  $\delta$  7.99 (s, 2H), 7.60 – 7.52 (m, 4H), 7.40 (t,  $J = 7.4$  Hz, 4H), 7.30 (dd,  $J = 18.8, 7.7$  Hz, 4H), 7.20 (d,  $J = 8.0$  Hz, 2H), 7.11 – 7.02 (m, 2H), 6.89 – 6.81 (m, 2H), 4.56 (s, 2H).  $^{13}\text{C NMR}$  (101 MHz,  $\text{CDCl}_3$ )  $\delta$  135.98, 134.59, 133.40, 129.44, 128.80, 128.43, 127.61, 122.05, 120.11, 119.52, 112.13, 110.61, 21.40. Data in accordance with the literature.<sup>11</sup>

### 3,3'-((3,4,5-trifluorophenyl)methylene)bis(1H-indole) 17

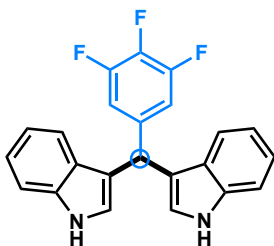

As a fuchsia solid:  $R_f$  0.50 (PE: EA = 5:1);  $^1\text{H NMR}$  (400 MHz,  $\text{CDCl}_3$ )  $\delta$  7.97 (s, 2H), 7.41 – 7.34 (m, 4H), 7.24 – 7.18 (m, 2H), 7.09 – 7.02 (m, 2H), 6.95 (dd,  $J = 8.7, 6.6$  Hz,



2H), 6.66 (d,  $J = 2.6$  Hz, 2H), 5.82 (s, 1H).  $^{13}\text{C}$  NMR (101 MHz,  $\text{CDCl}_3$ )  $\delta$  151.18 (dd,  $J = 249.0, 11.0$  Hz), 140.69, 139.51 (dt,  $J = 252.0, 20.0$  Hz), 136.80, 126.73, 123.74, 122.45, 119.72, 118.26, 112.71 (d,  $J = 5.3$  Hz), 112.56 (d,  $J = 5.3$  Hz), 111.46, 39.71.  $^{19}\text{F}$  NMR (376 MHz,  $\text{CDCl}_3$ )  $\delta$  -134.77 (d,  $J = 31.5$  Hz), -163.57 (d,  $J = 26.0$  Hz). Data in accordance with the literature.<sup>17</sup>

### 3,3'-((4-(trifluoromethyl)phenyl)methylene)bis(1H-indole) 18

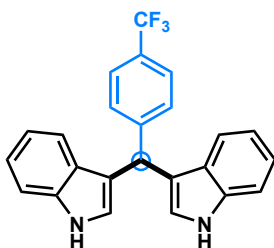

As a red solid:  $R_f$  0.45 (PE: EA = 5:1);  $^1\text{H}$  NMR (400 MHz,  $\text{CDCl}_3$ )  $\delta$  7.97 (s, 2H), 7.54 (d,  $J = 8.1$  Hz, 2H), 7.46 (d,  $J = 8.1$  Hz, 2H), 7.37 (dd,  $J = 7.7, 3.6$  Hz, 4H), 7.20 (t,  $J = 7.6$  Hz, 2H), 7.06 – 7.00 (m, 2H), 6.65 (d,  $J = 2.5$  Hz, 2H), 5.95 (s, 1H).  $^{13}\text{C}$  NMR (101 MHz,  $\text{CDCl}_3$ )  $\delta$  148.24, 136.77, 129.11, 126.91, 125.35, 125.30, 123.77, 122.28, 119.83, 119.54, 118.86, 111.27, 40.17.  $^{19}\text{F}$  NMR (376 MHz,  $\text{CDCl}_3$ )  $\delta$  -62.05. Data in accordance with the literature.<sup>15</sup>

### 3,3'-((4-(trifluoromethyl)phenyl)methylene)bis(1-methyl-1H-indole) 19

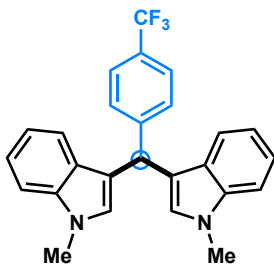

As a red solid:  $R_f$  0.25 (PE: EA = 50:1);  $^1\text{H NMR}$  (400 MHz,  $\text{CDCl}_3$ )  $\delta$  7.54 (d,  $J = 8.0$  Hz, 2H), 7.46 (d,  $J = 7.8$  Hz, 2H), 7.36 (d,  $J = 7.9$  Hz, 2H), 7.32 (d,  $J = 8.2$  Hz, 1H), 7.25 – 7.20 (m, 2H), 7.05 – 7.00 (m, 2H), 6.53 (s, 1H), 5.94 (s, 1H), 3.70 (s, 6H).  $^{13}\text{C NMR}$  (101 MHz,  $\text{CDCl}_3$ )  $\delta$  148.72, 137.54, 129.08, 128.41, 127.33, 125.32 (q,  $J = 4.1$  Hz), 121.77, 119.93, 118.97, 117.40, 109.33, 40.09, 32.82.  $^{19}\text{F NMR}$  (376 MHz,  $\text{CDCl}_3$ )  $\delta$  -61.97. Data in accordance with the literature.<sup>16</sup>

#### 4-(di(1H-indol-3-yl)methyl)benzonitrile 20

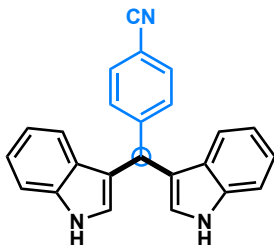

As a pink solid:  $R_f$  0.5 (PE: EA = 2:1);  $^1\text{H NMR}$  (401 MHz,  $\text{DMSO}-d_6$ )  $\delta$  10.98 (d,  $J = 2.5$  Hz, 2H), 7.83 (d,  $J = 7.8$  Hz, 1H), 7.62 – 7.54 (m, 1H), 7.42 (dd,  $J = 24.5, 7.1$  Hz, 4H), 7.25 (d,  $J = 8.0$  Hz, 2H), 7.07 (t,  $J = 8.2$  Hz, 2H), 6.94 – 6.88 (m, 2H), 6.85 (s, 2H), 6.16 (s, 1H).  $^{13}\text{C NMR}$  (101 MHz,  $\text{DMSO}-d_6$ )  $\delta$  148.74, 137.13, 133.70, 133.52, 129.74, 127.62, 126.83, 124.68, 121.73, 119.13, 118.63, 116.56, 112.23, 111.76, 38.77. Data in accordance with the literature.<sup>14</sup>

### 3,3'-((4-ethynylphenyl)methylene)bis(1H-indole) 21

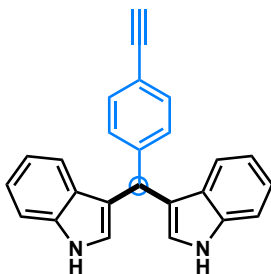

As a red solid:  $R_f$  0.25 (PE: EA = 5:1);  $^1\text{H NMR}$  (401 MHz,  $\text{CDCl}_3$ )  $\delta$  7.78 (s, 1H), 7.44 (d,  $J = 8.3$  Hz, 3H), 7.40 (d,  $J = 7.9$  Hz, 2H), 7.35 – 7.29 (m, 6H), 7.21 (ddd,  $J = 8.2, 7.0, 1.2$  Hz, 3H), 7.05 (ddd,  $J = 8.1, 7.0, 1.1$  Hz, 3H), 6.57 (d,  $J = 1.4$  Hz, 2H), 5.89 (s, 2H), 3.08 (s, 1H).  $^{13}\text{C NMR}$  (101 MHz,  $\text{CDCl}_3$ )  $\delta$  145.21, 136.76, 132.27, 128.88, 127.02, 123.81, 122.18, 119.95, 119.89, 119.47, 119.10, 112.43, 85.01, 40.21. Data in accordance with the literature.<sup>17</sup>

### 3,3'-((naphthalen-2-yl)methylene)bis(1H-indole) 22

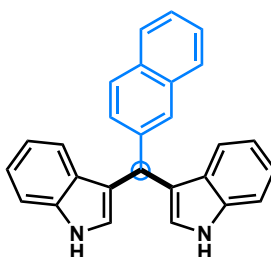

As a red solid:  $R_f$  0.30 (PE: EA = 5:1);  $^1\text{H NMR}$  (401 MHz,  $\text{CDCl}_3$ )  $\delta$  7.83 (t,  $J = 4.7$  Hz, 3H), 7.79 – 7.75 (m, 2H), 7.74 – 7.67 (m, 1H), 7.53 (dd,  $J = 8.6, 1.7$  Hz, 1H), 7.46 – 7.41 (m, 4H), 7.34 (d,  $J = 8.2$  Hz, 2H), 7.21 – 7.15 (m, 2H), 7.04 – 6.98 (m, 2H), 6.62 (d,  $J = 1.5$  Hz, 2H), 6.07 (s, 1H).  $^{13}\text{C NMR}$  (101 MHz,  $\text{CDCl}_3$ )  $\delta$  141.70, 136.77, 133.70,

132.45, 128.03, 127.87, 127.69, 127.18, 126.85, 125.82, 125.41, 123.93, 122.07, 120.06, 119.58, 119.39, 111.19, 40.38. Data in accordance with the literature.<sup>14</sup>

### 3,3'-(pyridin-2-ylmethylene)bis(1H-indole) 23

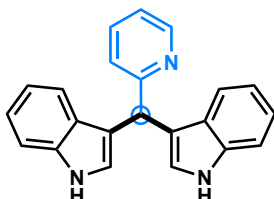

As a white solid:  $R_f$  0.35 (PE: EA = 2:1);  $^1\text{H NMR}$  (401 MHz,  $\text{DMSO-}d_6$ )  $\delta$  10.96 (s, 2H), 8.49 (d,  $J = 5.1$  Hz, 1H), 7.66 (t,  $J = 7.7$  Hz, 1H), 7.41 – 7.28 (m, 5H), 7.17 (t,  $J = 7.1$  Hz, 1H), 7.03 (t,  $J = 6.6$  Hz, 2H), 6.94 (s, 2H), 6.86 (t,  $J = 8.5$  Hz, 2H), 5.92 (s, 1H).  $^{13}\text{C NMR}$  (101 MHz,  $\text{DMSO-}d_6$ )  $\delta$  164.60, 149.30, 137.02, 136.99, 127.25, 124.17, 123.04, 121.82, 121.41, 119.51, 118.78, 117.43, 112.69, 43.20. Data in accordance with the literature.<sup>14</sup>

### 3,3'-(pyridin-3-ylmethylene)bis(1H-indole) 24

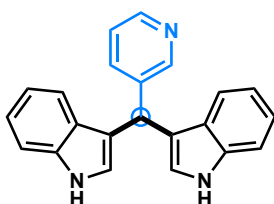

As a purple solid:  $R_f$  0.45 (PE: EA = 1:1);  $^1\text{H NMR}$  (400 MHz,  $\text{DMSO-}D_6$ )  $\delta$  10.92, 8.62, 8.62, 8.40, 8.40, 8.39, 8.38, 7.71, 7.69, 7.38, 7.36, 7.31, 7.30, 7.29, 7.27, 7.07, 7.05, 7.03, 6.90, 6.88, 6.86, 5.92.  $^{13}\text{C NMR}$  (101 MHz,  $\text{DMSO-}d_6$ )  $\delta$  150.19, 147.69, 140.81,

137.13, 136.15, 126.91, 124.22, 123.85, 121.59, 119.50, 118.88, 117.67, 112.10, 37.62.

Data in accordance with the literature.<sup>14</sup>

### 3,3'-(thiophen-2-ylmethylene)bis(1H-indole) 25

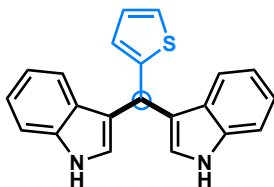

As an orange solid:  $R_f$  0.35 (PE: EA = 5:1);  $^1\text{H NMR}$  (400 MHz,  $\text{CDCl}_3$ )  $\delta$  7.92 (s, 2H), 7.47 (d,  $J = 7.3$  Hz, 2H), 7.36 (d,  $J = 8.2$  Hz, 2H), 7.22 – 7.12 (m, 3H), 7.04 (t,  $J = 7.5$  Hz, 2H), 6.95 – 6.88 (m, 2H), 6.83 (d,  $J = 1.5$  Hz, 2H), 6.17 (s, 1H).  $^{13}\text{C NMR}$  (101 MHz,  $\text{CDCl}_3$ )  $\delta$  148.71, 136.64, 126.82, 126.54, 125.24, 123.73, 123.30, 122.12, 119.86, 119.76, 119.46, 111.24, 35.37. Data in accordance with the literature.<sup>14</sup>

### 3,3'-(furan-2-ylmethylene)bis(1H-indole) 26

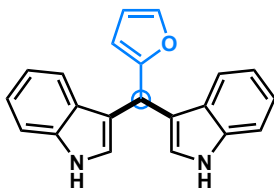

As an orange solid:  $R_f$  0.40 (PE: EA = 5:1);  $^1\text{H NMR}$  (400 MHz,  $\text{CDCl}_3$ )  $\delta$  7.94 (s, 2H), 7.49 (d,  $J = 7.9$  Hz, 2H), 7.35 (d,  $J = 8.2$  Hz, 3H), 7.21 – 7.15 (m, 2H), 7.07 – 7.02 (m, 2H), 6.86 (d,  $J = 1.5$  Hz, 2H), 6.31 (dd,  $J = 3.2, 1.8$  Hz, 1H), 6.06 (d,  $J = 4.2$  Hz, 1H), 5.95 (s, 1H).  $^{13}\text{C NMR}$  (101 MHz,  $\text{CDCl}_3$ )  $\delta$  157.88, 141.36, 136.61, 126.85, 123.18, 122.07, 119.78, 119.46, 117.64, 111.25, 110.26, 106.73, 34.19. Data in accordance with the literature.<sup>15</sup>

## 2-(di(1H-indol-3-yl)methyl)benzo[d]thiazole 27

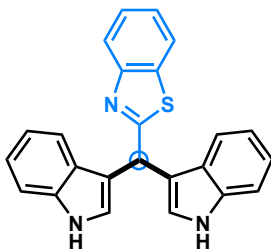

As a brown solid:  $R_f$  0.30 (PE: EA = 2:1);  $^1\text{H NMR}$  (400 MHz,  $\text{DMSO-}d_6$ )  $\delta$  11.06 (s, 1H), 7.94 (t,  $J = 7.6$  Hz, 2H), 7.46 (d,  $J = 8.1$  Hz, 3H), 7.38 (dd,  $J = 12.7, 7.9$  Hz, 3H), 7.23 (d,  $J = 2.4$  Hz, 2H), 7.11 – 7.03 (m, 2H), 6.92 (t,  $J = 7.6$  Hz, 2H), 6.39 (d,  $J = 6.0$  Hz, 1H).  $^{13}\text{C NMR}$  (101 MHz,  $\text{DMSO-}d_6$ )  $\delta$  176.93, 153.51, 136.97, 135.61, 126.86, 126.43, 125.26, 124.59, 122.95, 122.63, 121.75, 119.46, 119.18, 115.81, 111.71. **HRMS** (EI) Calcd for  $\text{C}_{24}\text{H}_{17}\text{N}_3\text{S}$ :  $[\text{M}+\text{H}]^+$  380.1221. Found:  $m/z$  380.1219.

## tri(1H-indol-3-yl)methane 28

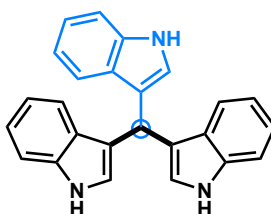

As a white solid:  $R_f$  0.45 (PE: EA = 2:1);  $^1\text{H NMR}$  (400 MHz,  $\text{DMSO-}d_6$ )  $\delta$  10.75 (d,  $J = 2.4$  Hz, 3H), 7.41 (d,  $J = 7.9$  Hz, 3H), 7.34 (d,  $J = 8.1$  Hz, 3H), 7.02 (t,  $J = 7.5$  Hz, 3H), 6.95 (d,  $J = 2.3$  Hz, 3H), 6.90 – 6.81 (m, 3H), 6.06 (s, 1H).  $^{13}\text{C NMR}$  (101 MHz,  $\text{DMSO-}D_6$ )  $\delta$  137.09, 127.28, 123.74, 121.17, 119.84, 118.77, 118.48, 111.91, 31.44. Data in accordance with the literature.<sup>16</sup>

## 3,3'-(cyclohexylmethylene)bis(1H-indole) 29

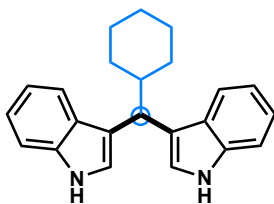

As a brown solid:  $R_f$  0.25 (PE: EA = 5:1);  $^1\text{H NMR}$  (401 MHz,  $\text{CDCl}_3$ )  $\delta$  7.71 (s, 2H), 7.69 (s, 1H), 7.28 – 7.23 (m, 2H), 7.17 (td,  $J = 8.1, 7.5, 1.3$  Hz, 2H), 7.10 (ddd,  $J = 8.0, 6.9, 1.2$  Hz, 2H), 6.99 (d,  $J = 2.4$  Hz, 2H), 4.29 (d,  $J = 8.8$  Hz, 1H), 2.27 (dddd,  $J = 14.6, 11.6, 7.7, 3.2$  Hz, 1H), 1.86 (d,  $J = 11.7$  Hz, 2H), 1.72 (d,  $J = 13.6$  Hz, 3H), 1.34 – 1.21 (m, 2H), 1.17 – 1.02 (m, 3H).  $^{13}\text{C NMR}$  (101 MHz,  $\text{CDCl}_3$ )  $\delta$  136.33, 127.88, 121.70, 119.87, 119.80, 119.08, 111.12, 43.04, 40.23, 32.48, 26.83, 26.78. Data in accordance with the literature.<sup>12</sup>

### 3,3'-(cyclohex-2-en-1-ylmethylene)bis(1H-indole) 30

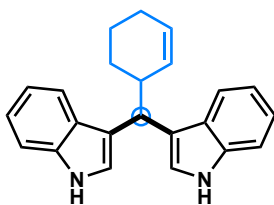

As a brown solid:  $R_f$  0.35 (PE: EA = 5:1);  $^1\text{H NMR}$  (400 MHz,  $\text{CDCl}_3$ )  $\delta$  7.87 (d,  $J = 7.8$  Hz, 2H), 7.69 (d,  $J = 7.9$  Hz, 2H), 7.30 (dd,  $J = 7.9, 3.5$  Hz, 2H), 7.18 – 7.03 (m, 6H), 5.72 – 5.59 (m, 2H), 4.35 (d,  $J = 9.4$  Hz, 1H), 2.67 – 2.54 (m, 1H), 2.18 – 2.02 (m, 3H), 1.98 – 1.83 (m, 2H), 1.43 – 1.31 (m, 1H).  $^{13}\text{C NMR}$  (101 MHz,  $\text{CDCl}_3$ )  $\delta$  136.36, 136.33, 127.85, 127.67, 127.12, 127.01, 121.79, 121.73, 121.59, 119.71, 119.53, 119.48, 119.16,

111.16, 39.38, 38.88, 30.96, 27.35, 25.25. **HRMS** (EI) Calcd for C<sub>23</sub>H<sub>22</sub>N<sub>2</sub>: [M+H]<sup>+</sup> 327.1861. Found: m/z 327.1856. Data in accordance with the literature.<sup>13</sup>

### 3,3'-(bicyclo[2.2.1]hept-5-en-2-ylmethylene)bis(1H-indole) 31

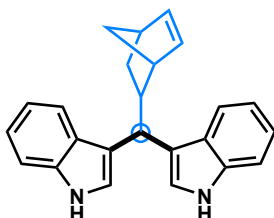

As a pale brown solid: R<sub>f</sub> 0.35 (PE: EA = 5:1); **<sup>1</sup>H NMR** (400 MHz, CDCl<sub>3</sub>) δ 7.84 (s, 2H), 7.70 (d, *J* = 7.8 Hz, 1H), 7.56 (d, *J* = 6.8 Hz, 1H), 7.29 (d, *J* = 9.2 Hz, 1H), 7.19 (s, 1H), 7.15 (d, *J* = 2.7 Hz, 1H), 7.13 – 7.08 (m, 1H), 7.05 (d, *J* = 9.0 Hz, 2H), 7.00 – 6.95 (m, 1H), 6.28 – 6.23 (m, 1H), 6.13 (d, *J* = 8.7 Hz, 1H), 3.87 (d, *J* = 11.9 Hz, 1H), 3.21 – 3.12 (m, 1H), 2.82 (s, 1H), 2.65 (s, 1H), 1.98 (td, *J* = 8.6, 8.2, 4.5 Hz, 1H), 1.56 (s, 1H), 1.44 – 1.32 (m, 2H), 0.81 (d, *J* = 11.8 Hz, 1H). **<sup>13</sup>C NMR** (101 MHz, CDCl<sub>3</sub>) δ 137.56, 136.53, 136.37, 133.10, 127.65, 126.97, 121.72, 121.63, 121.45, 121.21, 120.59, 120.48, 119.92, 119.63, 119.00, 111.25, 111.11, 49.63, 45.58, 44.48, 43.18, 38.82, 32.92. **HRMS** (EI) Calcd for C<sub>24</sub>H<sub>22</sub>N<sub>2</sub>: [M+H]<sup>+</sup> 339.1861. Found: m/z 339.1867.

### 1H,1''H-[3,3':3',3''-terindol]-2'(1'H)-one 32

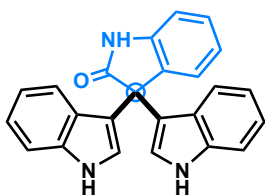



As a white solid:  $R_f$  0.35 (PE: EA = 1:1);  $^1\text{H NMR}$  (400 MHz,  $\text{DMSO-}d_6$ )  $\delta$  11.01 (s, 1H), 10.64 (s, 1H), 7.36 (d,  $J = 8.2$  Hz, 2H), 7.23 (d,  $J = 7.8$  Hz, 3H), 7.04 – 6.98 (m, 1H), 6.93 (t,  $J = 7.0$  Hz, 0H), 6.86 (d,  $J = 2.5$  Hz, 2H), 6.80 (t,  $J = 8.1$  Hz, 1H).  $^{13}\text{C NMR}$  (101 MHz,  $\text{DMSO-}d_6$ )  $\delta$  179.31, 141.86, 137.45, 135.14, 128.38, 126.23, 125.44, 124.83, 122.01, 121.48, 121.31, 118.76, 115.19, 112.15, 110.76, 53.09. Data in accordance with the literature.<sup>19</sup>

**7'-methyl-1H,1''H-[3,3':3',3''-terindol]-2'(1'H)-one 33**

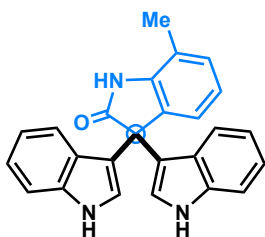

As a white solid:  $R_f$  0.4 (PE: EA = 1:1);  $^1\text{H NMR}$  (400 MHz,  $\text{DMSO-}d_6$ )  $\delta$  10.95 (s, 2H), 10.64 (s, 1H), 7.34 (d,  $J = 8.1$  Hz, 2H), 7.23 (d,  $J = 8.1$  Hz, 2H), 7.02 (dd,  $J = 18.0, 7.8$  Hz, 4H), 6.87 – 6.76 (m, 5H), 2.31 (s, 3H).  $^{13}\text{C NMR}$  (101 MHz,  $\text{DMSO-}d_6$ )  $\delta$  180.90, 140.40, 137.45, 134.77, 129.56, 126.28, 124.76, 122.79, 121.91, 121.41, 119.36, 118.72, 115.01, 112.10, 80.22, 53.33, 16.76. Data in accordance with the literature.<sup>19</sup>

**5'-methyl-1H,1''H-[3,3':3',3''-terindol]-2'(1'H)-one 34**

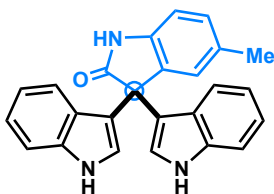

As a lavender solid:  $R_f$  0.4 (PE: EA = 1:1);  $^1\text{H NMR}$  (400 MHz,  $\text{DMSO-}d_6$ )  $\delta$  10.93 (d,  $J$  = 2.6 Hz, 2H), 10.49 (s, 1H), 7.32 (d,  $J$  = 8.1 Hz, 2H), 7.21 (d,  $J$  = 7.1 Hz, 2H), 7.02 – 6.95 (m, 4H), 6.85 (d,  $J$  = 7.6 Hz, 1H), 6.81 (d,  $J$  = 2.5 Hz, 2H), 6.80 – 6.74 (m, 2H), 2.15 (s, 3H).  $^{13}\text{C NMR}$  (101 MHz,  $\text{DMSO-}d_6$ )  $\delta$  179.34, 139.43, 137.45, 135.17, 130.71, 128.97, 126.24, 124.82, 121.46, 118.75, 114.92, 112.12, 109.93, 53.14, 21.35. Data in accordance with the literature.<sup>19</sup>

### 6'-methoxy-1H,1''H-[3,3':3',3''-terindol]-2'(1'H)-one 35

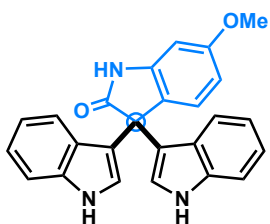

As a milky solid:  $R_f$  0.25 (PE: EA = 2:1);  $^1\text{H NMR}$  (401 MHz,  $\text{DMSO-}d_6$ )  $\delta$  10.90 (s, 2H), 10.52 (s, 1H), 7.31 (d,  $J$  = 8.1 Hz, 2H), 7.21 (d,  $J$  = 8.1 Hz, 2H), 7.08 (d,  $J$  = 8.2 Hz, 1H), 7.02 – 6.95 (m, 2H), 6.81 (s, 2H), 6.77 (t,  $J$  = 7.6 Hz, 2H), 6.52 (s, 1H), 6.45 (d,  $J$  = 8.3 Hz, 1H), 3.71 (d,  $J$  = 1.7 Hz, 3H).  $^{13}\text{C NMR}$  (101 MHz,  $\text{DMSO-}d_6$ )  $\delta$  179.80, 159.08, 142.98, 137.48, 127.18, 126.26, 126.08, 124.75, 121.43, 121.34, 118.73, 115.26, 112.11, 106.88, 96.80, 54.79, 53.39. Data in accordance with the literature.<sup>19</sup>

### 5'-methoxy-1H,1''H-[3,3':3',3''-terindol]-2'(1'H)-one 36

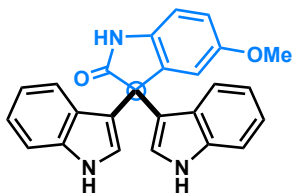

As a pale pink solid:  $R_f$  0.25 (PE: EA = 2:1);  $^1\text{H NMR}$  (400 MHz,  $\text{DMSO-}d_6$ )  $\delta$  11.00 (s, 1H), 10.48 (s, 1H), 7.36 (d,  $J = 8.1$  Hz, 2H), 7.25 (d,  $J = 8.1$  Hz, 2H), 7.02 (t,  $J = 8.2$  Hz, 1H), 6.92 (d,  $J = 8.9$  Hz, 1H), 6.88 (d,  $J = 2.5$  Hz, 2H), 6.81 (dt,  $J = 8.1, 3.7$  Hz, 3H), 3.61 (s, 3H).  $^{13}\text{C NMR}$  (101 MHz,  $\text{DMSO-}d_6$ )  $\delta$  178.57, 154.71, 137.45, 136.49, 135.22, 126.20, 124.90, 121.48, 121.31, 118.77, 114.76, 112.62, 112.57, 112.16, 110.41, 55.82, 52.77. Data in accordance with the literature.<sup>19</sup>

**5'-nitro-1H,1''H-[3,3':3',3''-terindol]-2'(1'H)-one 37**

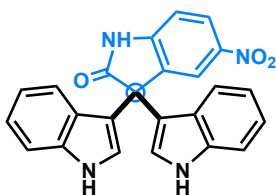

As a pale yellow solid:  $R_f$  0.25 (PE: EA = 1:1);  $^1\text{H NMR}$  (400 MHz,  $\text{DMSO-}d_6$ )  $\delta$  11.39 (s, 1H), 11.14 (s, 2H), 8.24 (dd,  $J = 8.6, 2.4$  Hz, 1H), 7.98 (d,  $J = 2.4$  Hz, 1H), 7.38 (d,  $J = 8.1$  Hz, 2H), 7.22 (dd,  $J = 8.4, 3.0$  Hz, 3H), 7.04 (t,  $J = 7.6$  Hz, 2H), 6.96 (d,  $J = 2.6$  Hz, 2H), 6.84 (t,  $J = 7.5$  Hz, 2H).  $^{13}\text{C NMR}$  (101 MHz,  $\text{DMSO-}d_6$ )  $\delta$  180.61, 148.36, 143.68, 137.56, 135.81, 126.01, 125.92, 125.15, 121.74, 120.86, 120.62, 119.12, 113.83, 112.40, 109.33, 54.79. Data in accordance with the literature.<sup>19</sup>

**5'-fluoro-1H,1''H-[3,3':3',3''-terindol]-2'(1'H)-one 38**

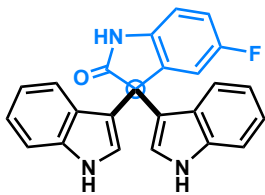

As a milky solid:  $R_f$  0.3 (PE: EA = 1:1);  $^1\text{H NMR}$  (401 MHz,  $\text{DMSO-}d_6$ )  $\delta$  10.98 (s, 2H), 10.62 (s, 1H), 7.34 (d,  $J = 8.2$  Hz, 2H), 7.20 (d,  $J = 8.0$  Hz, 2H), 7.08 – 6.92 (m, 5H), 6.87 (s, 2H), 6.79 (t,  $J = 7.5$  Hz, 2H).  $^{13}\text{C NMR}$  (101 MHz,  $\text{DMSO-}d_6$ )  $\delta$  179.22, 158.40 (d,  $J = 236.6$  Hz), 138.10, 137.48, 136.87 (d,  $J = 7.5$  Hz), 126.08, 124.98, 121.58, 121.14, 118.92, 114.76 (d,  $J = 23.1$  Hz), 114.19, 112.97 (d,  $J = 24.3$  Hz), 112.24, 110.90 (d,  $J = 8.2$  Hz), 53.64.  $^{19}\text{F NMR}$  (376 MHz,  $\text{DMSO-}d_6$ )  $\delta$  -121.45 (td,  $J = 8.9, 4.4$  Hz). Data in accordance with the literature.<sup>19</sup>

**6'-fluoro-1H,1''H-[3,3':3',3''-terindol]-2'(1'H)-one 39**

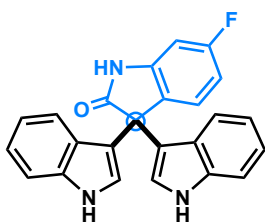

As a pale pink solid:  $R_f$  0.3 (PE: EA = 1:1);  $^1\text{H NMR}$  (400 MHz,  $\text{DMSO-}d_6$ )  $\delta$  11.00 (s, 2H), 10.77 (s, 1H), 7.36 (d,  $J = 8.1$  Hz, 2H), 7.22 (d,  $J = 8.1$  Hz, 3H), 7.02 (t,  $J = 7.0$  Hz, 2H), 6.86 (d,  $J = 2.5$  Hz, 2H), 6.84 – 6.79 (m, 3H), 6.77 – 6.70 (m, 1H).  $^{13}\text{C NMR}$  (101 MHz,  $\text{DMSO-}d_6$ )  $\delta$  179.51, 162.34 (d,  $J = 232.2$  Hz), 143.40 (d,  $J = 12.2$  Hz), 137.48, 130.99, 126.66 (d,  $J = 9.9$  Hz), 126.12, 124.85, 121.51, 121.17, 118.83, 114.55, 112.20, 108.06 (d,  $J = 21.8$  Hz), 98.24 (d,  $J = 26.6$  Hz), 52.68.  $^{19}\text{F NMR}$  (376 MHz,  $\text{DMSO-}d_6$ )  $\delta$  -113.23 – -113.32 (m). **HRMS** (EI) Calcd for  $\text{C}_{24}\text{H}_{16}\text{FN}_3\text{O}$ :  $[\text{M}+\text{H}]^+$  382.1365. Found:  $m/z$  382.1356.

**7'-fluoro-1H,1''H-[3,3':3',3''-terindol]-2'(1'H)-one 40**

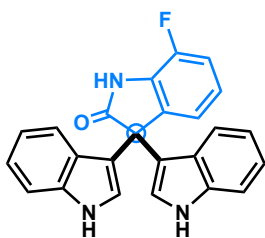

As a milky solid:  $R_f$  0.3 (PE: EA = 1:1);  $^1\text{H NMR}$  (401 MHz,  $\text{DMSO-}d_6$ )  $\delta$  11.09 (s, 1H), 10.98 (s, 2H), 7.33 (d,  $J = 8.1$  Hz, 2H), 7.19 (d,  $J = 8.0$  Hz, 2H), 7.12 (t,  $J = 9.3$  Hz, 1H), 7.05 (d,  $J = 5.6$  Hz, 1H), 6.99 (t,  $J = 7.6$  Hz, 2H), 6.91 (q,  $J = 7.7, 6.5$  Hz, 1H), 6.83 (s, 2H), 6.81 – 6.73 (m, 2H).  $^{13}\text{C NMR}$  (101 MHz,  $\text{DMSO-}d_6$ )  $\delta$  179.06, 147.01 (d,  $J = 242.3$  Hz), 138.01, 137.47, 128.92 (d,  $J = 12.4$  Hz), 126.09, 124.93, 122.87 (d,  $J = 5.9$  Hz), 121.57, 121.14, 118.91, 115.37 (d,  $J = 17.2$  Hz), 114.23, 112.23, 53.44.  $^{19}\text{F NMR}$  (376 MHz,  $\text{DMSO-}d_6$ )  $\delta$  -132.49 (dd,  $J = 10.4, 4.7$  Hz). Data in accordance with the literature.<sup>19</sup>

**5'-chloro-1H,1''H-[3,3':3',3''-terindol]-2'(1'H)-one 41**

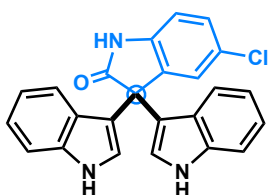

As a milky solid:  $R_f$  0.3 (PE: EA = 1:1);  $^1\text{H NMR}$  (401 MHz,  $\text{DMSO-}d_6$ )  $\delta$  11.03 (s, 2H), 10.77 (s, 1H), 7.37 (d,  $J = 8.3$  Hz, 2H), 7.30 (d,  $J = 8.3$  Hz, 1H), 7.24 – 7.16 (m, 3H), 7.08 – 6.98 (m, 3H), 6.90 (s, 2H), 6.86 – 6.79 (m, 2H).  $^{13}\text{C NMR}$  (101 MHz,  $\text{DMSO-}d_6$ )  $\delta$  178.93, 140.82, 137.48, 137.15, 128.39, 126.04, 125.98, 125.22, 124.97, 121.61, 121.06, 118.97, 114.04, 112.29, 111.67, 53.98. Data in accordance with the literature.<sup>19</sup>

**4'-chloro-1H,1''H-[3,3':3',3''-terindol]-2'(1'H)-one 42**

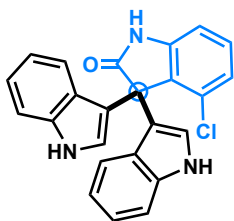

As a white solid:  $R_f$  0.3 (PE: EA = 1:1);  $^1\text{H NMR}$  (401 MHz,  $\text{DMSO-}d_6$ )  $\delta$  10.99 (s, 2H), 10.77 (s, 1H), 7.35 (d,  $J = 8.1$  Hz, 2H), 7.25 (dd,  $J = 22.3, 9.2$  Hz, 4H), 7.04 – 6.95 (m, 3H), 6.88 (s, 2H), 6.85 – 6.79 (m, 2H).  $^{13}\text{C NMR}$  (101 MHz,  $\text{DMSO-}d_6$ )  $\delta$  179.50, 144.28, 137.26, 131.54, 130.50, 126.40, 125.97, 123.39, 121.43, 121.08, 118.85, 112.21, 111.16, 109.13, 77.20, 53.97. **HRMS** (EI) Calcd for  $\text{C}_{24}\text{H}_{16}\text{ClN}_3\text{O}$ :  $[\text{M}+\text{H}]^+$  398.1060. Found:  $m/z$  398.1057.

#### 5'-bromo-1H,1''H-[3,3':3',3''-terindol]-2'(1'H)-one 43

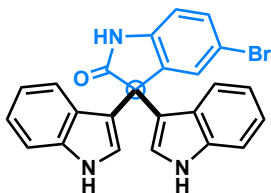

As a milky solid:  $R_f$  0.3 (PE: EA = 1:1);  $^1\text{H NMR}$  (401 MHz,  $\text{DMSO-}d_6$ )  $\delta$  11.00 (s, 2H), 10.75 (s, 1H), 7.36 (dd,  $J = 19.2, 8.1$  Hz, 3H), 7.26 (s, 1H), 7.17 (d,  $J = 7.9$  Hz, 2H), 7.00 (t,  $J = 7.6$  Hz, 2H), 6.94 (d,  $J = 8.2$  Hz, 1H), 6.86 (s, 2H), 6.79 (t,  $J = 7.6$  Hz, 2H).  $^{13}\text{C NMR}$  (101 MHz,  $\text{DMSO-}d_6$ )  $\delta$  179.80, 141.23, 137.53, 137.48, 131.24, 127.89, 126.03, 124.97, 121.62, 121.04, 118.97, 114.04, 113.68, 112.30, 112.23, 54.28. Data in accordance with the literature.<sup>19</sup>

#### 5,5''-dimethoxy-1H,1''H-[3,3':3',3''-terindol]-2'(1'H)-one 44

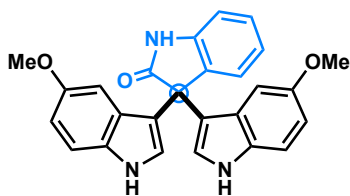

As a white solid:  $R_f$  0.3 (PE: EA = 2:1);  $^1\text{H NMR}$  (401 MHz,  $\text{DMSO-}d_6$ )  $\delta$  10.77 (s, 2H), 10.57 (s, 1H), 7.20 (dd,  $J = 17.4, 6.9$  Hz, 4H), 6.97 (d,  $J = 6.7$  Hz, 1H), 6.94 – 6.88 (m, 1H), 6.82 (s, 2H), 6.66 (d,  $J = 10.9$  Hz, 4H), 3.49 (d,  $J = 1.9$  Hz, 6H).  $^{13}\text{C NMR}$  (101 MHz,  $\text{DMSO-}d_6$ )  $\delta$  179.31, 153.33, 142.39, 135.08, 132.34, 128.38, 126.65, 125.71, 125.52, 122.04, 114.16, 112.61, 110.96, 109.98, 103.84, 55.64, 53.04. Data in accordance with the literature.<sup>19</sup>

**5,5''-difluoro-1H,1''H-[3,3':3',3''-terindol]-2'(1'H)-one 45**

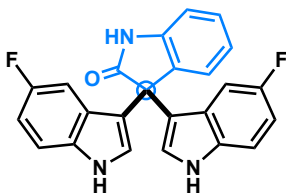

As a milky solid:  $R_f$  0.35 (PE: EA = 1:1);  $^1\text{H NMR}$  (401 MHz,  $\text{DMSO-}d_6$ )  $\delta$  11.01 (s, 2H), 10.61 (s, 1H), 7.17 (m, 4H), 7.10 (d,  $J = 10.1$  Hz, 2H), 6.96 (d,  $J = 7.7$  Hz, 1H), 6.91 (t,  $J = 7.5$  Hz, 1H), 6.82 (s, 2H), 6.70 – 6.61 (m, 2H).  $^{13}\text{C NMR}$  (101 MHz,  $\text{DMSO-}d_6$ )  $\delta$  179.05, 159.18 (d,  $J = 234.9$  Hz), 141.77, 137.34 (d,  $J = 12.6$  Hz), 134.65, 128.57, 125.37, 123.01, 122.24, 122.15, 114.99, 110.28, 107.43 (d,  $J = 24.1$  Hz), 98.02 (d,  $J = 25.4$  Hz), 52.87.  $^{19}\text{F NMR}$  (376 MHz,  $\text{DMSO-}d_6$ )  $\delta$  -121.75 – -122.07 (m). Data in accordance with the literature.<sup>19</sup>

**5,5''-dichloro-1H,1''H-[3,3':3',3''-terindol]-2'(1'H)-one 46**

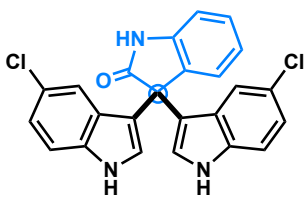

As a milky solid:  $R_f$  0.35 (PE: EA = 1:1);  $^1\text{H NMR}$  (400 MHz,  $\text{DMSO-}d_6$ )  $\delta$  11.24 (s, 2H), 10.76 (s, 1H), 7.40 (d,  $J = 8.6$  Hz, 2H), 7.27 (t,  $J = 7.7$  Hz, 1H), 7.19 (d,  $J = 10.0$  Hz, 3H), 7.07 – 7.01 (m, 3H), 6.99 (t,  $J = 8.0$  Hz, 1H), 6.94 (d,  $J = 2.4$  Hz, 2H).  $^{13}\text{C NMR}$  (101 MHz,  $\text{DMSO-}d_6$ )  $\delta$  178.10, 141.74, 136.00, 134.18, 128.79, 127.11, 126.67, 125.42, 123.50, 122.37, 121.66, 120.16, 114.43, 113.91, 110.39, 53.39. Data in accordance with the literature.<sup>19</sup>

**5,5''-dibromo-1H,1''H-[3,3':3'',3''-terindol]-2'(1'H)-one 47**

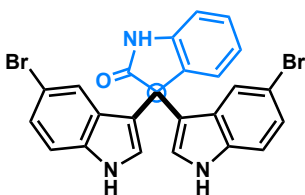

As a milky solid:  $R_f$  0.35 (PE: EA = 1:1);  $^1\text{H NMR}$  (401 MHz,  $\text{DMSO-}d_6$ )  $\delta$  11.19 (d,  $J = 2.7$  Hz, 2H), 10.70 (s, 1H), 7.32 (dd,  $J = 5.3, 3.3$  Hz, 4H), 7.23 (td,  $J = 7.7, 1.3$  Hz, 1H), 7.11 (dd,  $J = 8.7, 2.0$  Hz, 3H), 6.96 (dd,  $J = 18.0, 7.5$  Hz, 2H), 6.87 (d,  $J = 2.6$  Hz, 2H).  $^{13}\text{C NMR}$  (101 MHz,  $\text{DMSO-}d_6$ )  $\delta$  178.10, 141.74, 136.22, 134.12, 128.82, 127.79, 126.53, 125.42, 124.18, 123.19, 122.38, 114.39, 114.33, 111.60, 53.17. Data in accordance with the literature.<sup>19</sup>

**2'-oxo-1',2'-dihydro-1H,1''H-[3,3':3'',3''-terindole]-5,5''-dicyanitrile 48**



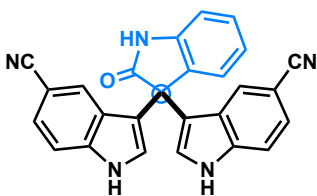

As a brown solid:  $R_f$  0.35 (PE: EA = 1:1);  $^1\text{H NMR}$  (400 MHz,  $\text{DMSO-}d_6$ )  $\delta$  11.63 (s, 2H), 10.82 (s, 1H), 7.53 (d,  $J = 8.6$  Hz, 4H), 7.36 (dd,  $J = 8.3, 1.6$  Hz, 2H), 7.29 – 7.21 (m, 2H), 7.08 (d,  $J = 2.5$  Hz, 2H), 7.01 (d,  $J = 7.7$  Hz, 1H), 6.97 (t,  $J = 7.5$  Hz, 1H).  $^{13}\text{C NMR}$  (101 MHz,  $\text{DMSO-}d_6$ )  $\delta$  179.50, 141.68, 139.35, 133.68, 129.07, 127.62, 126.33, 125.73, 125.57, 124.39, 122.63, 121.20, 115.59, 113.91, 110.64, 101.15, 52.58. Data in accordance with the literature.<sup>19</sup>

#### 2,2''-diphenyl-1H,1''H-[3,3':3',3''-terindol]-2'(1'H)-one 49

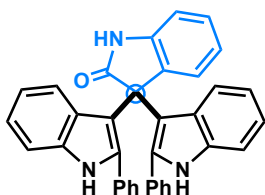

As a lavender solid:  $R_f$  0.3 (PE: EA = 1:1);  $^1\text{H NMR}$  (400 MHz,  $\text{DMSO-}d_6$ )  $\delta$  11.05 (s, 1H), 10.74 (s, 1H), 10.46 (s, 1H), 7.39 – 7.14 (m, 7H), 6.90-7.07 (m, 10H), 6.84 (t,  $J = 7.5$  Hz, 1H), 6.65 (dt,  $J = 23.9, 7.6$  Hz, 3H), 6.31 (s, 1H).  $^{13}\text{C NMR}$  (101 MHz,  $\text{DMSO-}d_6$ )  $\delta$  177.98, 141.49, 136.07, 136.02, 135.34, 134.66, 133.99, 129.48, 129.22, 128.36, 128.06, 127.85, 127.73, 127.58, 127.16, 126.37, 125.94, 122.03, 121.80, 121.05, 120.74, 118.86, 118.48, 112.16, 111.43, 111.11, 110.93, 109.66, 53.88. Data in accordance with the literature.<sup>20</sup>

#### (2R,3R)-4,4-di(1H-indol-3-yl)butane-1,2,3-triol 50

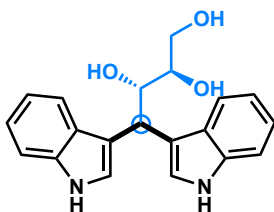

As a pale yellow solid:  $R_f$  0.3 (DCM:  $\text{CH}_3\text{OH}$  = 20:1);  $^1\text{H NMR}$  (401 MHz,  $\text{CD}_3\text{OD}$ )  $\delta$  7.70 (d,  $J$  = 7.9 Hz, 1H), 7.55 (d,  $J$  = 7.9 Hz, 1H), 7.34 – 7.26 (m, 3H), 7.19 (s, 1H), 7.07 – 7.00 (m, 2H), 6.97 – 6.88 (m, 2H), 5.07 (d,  $J$  = 3.9 Hz, 1H), 4.39 (dd,  $J$  = 7.7, 4.0 Hz, 1H), 3.81 (dd,  $J$  = 11.3, 3.2 Hz, 1H), 3.66 (dd,  $J$  = 11.2, 6.3 Hz, 1H), 3.61 – 3.51 (m, 1H).  $^{13}\text{C NMR}$  (101 MHz,  $\text{CD}_3\text{OD}$ )  $\delta$  128.35, 127.05, 123.70, 122.77, 120.79, 120.68, 119.04, 118.70, 118.09, 118.02, 117.39, 114.10, 110.77, 110.63, 75.16, 72.53, 63.85, 35.36. **HRMS** (EI) Calcd for  $\text{C}_{20}\text{H}_{20}\text{N}_2\text{O}_3$ :  $[\text{M}+\text{H}]^+$  337.1552. Found:  $m/z$  337.1566.

**(2S,3R,4R,5R)-1,1-di(1H-indol-3-yl)hexane-2,3,4,5-tetraol 51**

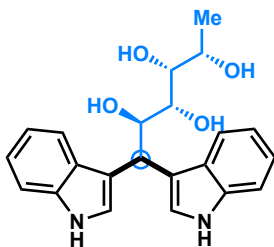

As a reddish solid:  $R_f$  0.25 (DCM:  $\text{CH}_3\text{OH}$  = 20:1);  $^1\text{H NMR}$  (401 MHz,  $\text{CD}_3\text{OD}$ )  $\delta$  7.70 (d,  $J$  = 8.0 Hz, 1H), 7.58 (d,  $J$  = 7.9 Hz, 1H), 7.36 – 7.27 (m, 3H), 7.17 (s, 1H), 7.04 (dd,

$J = 8.2, 7.0$  Hz, 2H), 6.93 (qd,  $J = 8.0, 1.0$  Hz, 2H), 5.15 (d,  $J = 3.3$  Hz, 1H), 4.52 (dd,  $J = 8.5, 3.3$  Hz, 1H), 3.82 (d,  $J = 9.6$  Hz, 1H), 3.80 – 3.75 (m, 1H), 3.66 (d,  $J = 7.5$  Hz, 1H), 1.17 (d,  $J = 6.2$  Hz, 3H).  $^{13}\text{C}$  NMR (101 MHz,  $\text{CD}_3\text{OD}$ )  $\delta$  136.88, 136.45, 128.45, 127.09, 123.87, 120.76, 120.66, 119.12, 118.76, 118.07, 117.97, 117.72, 113.86, 110.76, 110.62, 100.08, 74.61, 73.78, 70.44, 67.82, 35.20, 19.19. HRMS (EI) Calcd for  $\text{C}_{20}\text{H}_{20}\text{N}_2\text{O}_3$ :  $[\text{M}+\text{H}]^+$  381.1814. Found:  $m/z$  381.1814. Data in accordance with the literature.<sup>21</sup>

**(2S,3S,4R)-5,5-di(1H-indol-3-yl)pentane-1,2,3,4-tetraol 52**

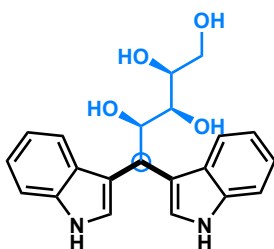

As a reddish solid:  $R_f$  0.3 (DCM:  $\text{CH}_3\text{OH} = 10:1$ );  $^1\text{H}$  NMR (401 MHz,  $\text{CD}_3\text{OD}$ )  $\delta$  7.68 (d,  $J = 8.0$  Hz, 1H), 7.62 (d,  $J = 6.8$  Hz, 1H), 7.32 (s, 3H), 7.28 (t,  $J = 7.4$  Hz, 5H), 7.20 (s, 3H), 7.06 – 6.98 (m, 4H), 6.92 (dd,  $J = 17.2, 7.5$  Hz, 3H), 4.88 (s, 2H), 4.80 (d,  $J = 8.7$  Hz, 1H), 4.64 (s, 5H), 3.76 (d,  $J = 9.3$  Hz, 3H), 3.62 – 3.48 (m, 3H).  $^{13}\text{C}$  NMR (101 MHz,  $\text{CD}_3\text{OD}$ )  $\delta$  138.15, 138.00, 129.16, 128.51, 123.78, 123.61, 122.08, 120.32, 119.40, 119.30, 117.99, 117.69, 112.06, 74.12, 71.53, 65.09, 38.59. HRMS (EI) Calcd for  $\text{C}_{21}\text{H}_{22}\text{N}_2\text{O}_4$ :  $[\text{M}+\text{H}]^+$  367.1658. Found:  $m/z$  367.1654. Data in accordance with the literature.<sup>11</sup>

**(2R,3R,4R)-5,5-di(1H-indol-3-yl)pentane-1,2,3,4-tetraol 53**

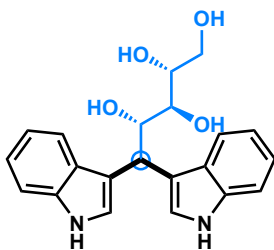

As a reddish solid:  $R_f$  0.25 (DCM:  $\text{CH}_3\text{OH}$  = 10:1);  $^1\text{H NMR}$  (401 MHz,  $\text{CD}_3\text{OD}$ )  $\delta$  7.65 (d,  $J$  = 9.0 Hz, 1H), 7.60 (d,  $J$  = 9.1 Hz, 1H), 7.38 (s, 1H), 7.31 (t,  $J$  = 7.8 Hz, 2H), 7.12 (s, 1H), 7.07 – 7.01 (m, 2H), 6.94 (t,  $J$  = 7.5 Hz, 2H), 5.15 (d,  $J$  = 3.1 Hz, 1H), 4.64 (s, 2H), 4.41 (dd,  $J$  = 8.5, 3.2 Hz, 1H), 3.91 – 3.84 (m, 1H), 3.79 (dd,  $J$  = 11.4, 3.7 Hz, 1H), 3.71 – 3.60 (m, 2H).  $^{13}\text{C NMR}$  (101 MHz,  $\text{CD}_3\text{OD}$ )  $\delta$  138.14, 137.59, 129.70, 128.26, 125.14, 124.45, 122.06, 121.94, 120.23, 119.88, 119.36, 119.30, 118.54, 114.96, 112.07, 111.89, 77.98, 75.97, 73.66, 63.93, 37.08. **HRMS** (EI) Calcd for  $\text{C}_{21}\text{H}_{22}\text{N}_2\text{O}_4$ :  $[\text{M}+\text{H}]^+$  367.1658. Found:  $m/z$  367.1663. Data in accordance with the literature.<sup>11</sup>

**(2R,3S,4S)-5,5-di(1H-indol-3-yl)pentane-1,2,3,4-tetraol 54**

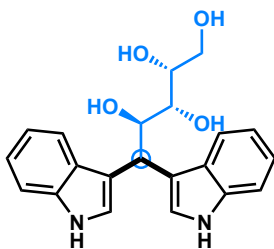

As a pale yellow solid:  $R_f$  0.2 (DCM:  $\text{CH}_3\text{OH}$  = 10:1);  $^1\text{H NMR}$  (401 MHz,  $\text{CD}_3\text{OD}$ )  $\delta$  7.69 (d,  $J$  = 8.0 Hz, 1H), 7.56 (d,  $J$  = 8.0 Hz, 1H), 7.36 – 7.26 (m, 4H), 7.18 (s, 1H), 7.09 – 6.99 (m, 3H), 6.97 – 6.88 (m, 1H), 5.13 (d,  $J$  = 3.1 Hz, 2H), 4.64 (s, 2H), 4.50 (dd,  $J$  = 8.6, 3.2 Hz, 2H), 4.00 (t,  $J$  = 6.2 Hz, 1H), 3.63 – 3.45 (m, 3H).  $^{13}\text{C NMR}$  (101 MHz,  $\text{CD}_3\text{OD}$ )  $\delta$  138.14, 137.68, 129.72, 128.35, 125.16, 124.18, 122.05, 121.95, 120.37,

120.01, 119.37, 119.26, 118.95, 115.04, 112.04, 111.91, 75.38, 73.01, 72.06, 65.85, 37.18. **HRMS** (EI) Calcd for  $C_{21}H_{22}N_2O_4$ :  $[M+H]^+$  367.1658. Found:  $m/z$  367.1660. Data in accordance with the literature.<sup>11</sup>

**(2R,3S,4R)-5,5-di(1H-indol-3-yl)pentane-1,2,3,4-tetraol 55**

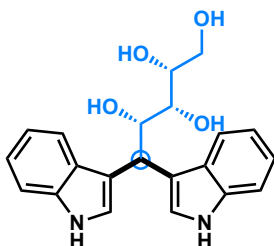

As a pale yellow solid:  $R_f$  0.2 (DCM:  $CH_3OH$  = 10:1);  **$^1H$  NMR** (400 MHz,  $CD_3OD$ )  $\delta$  7.71 (d,  $J$  = 7.7 Hz, 1H), 7.59 (d,  $J$  = 8.8 Hz, 2H), 7.38 (s, 2H), 7.32 – 7.25 (m, 4H), 7.11 (s, 2H), 7.03 (q,  $J$  = 6.7 Hz, 4H), 6.98 – 6.87 (m, 4H), 4.63 (s, 1H), 3.80 (q,  $J$  = 5.1, 4.7 Hz, 1H), 3.66 (t,  $J$  = 3.7 Hz, 2H), 3.56 (t,  $J$  = 5.2 Hz, 4H).  **$^{13}C$  NMR** (101 MHz,  $CD_3OD$ )  $\delta$  138.05, 137.88, 129.16, 128.28, 124.09, 123.94, 122.08, 122.00, 120.17, 120.10, 119.38, 119.32, 117.88, 116.77, 112.08, 111.99, 76.70, 74.97, 72.40, 65.03, 39.18. **HRMS** (EI) Calcd for  $C_{21}H_{22}N_2O_4$ :  $[M+H]^+$  367.1658. Found:  $m/z$  367.1651. Data in accordance with the literature.<sup>11</sup>

**3-((3a,7a-dihydro-1H-indol-3-yl)(4-(((2S,3R,4R,5R,6R)-3,4,5-tris(benzyloxy)-6-((benzyloxy)methyl)tetrahydro-2H-pyran-2-yl)oxy)cyclohexa-2,4-dien-1-yl)methyl)-1H-indole 56**

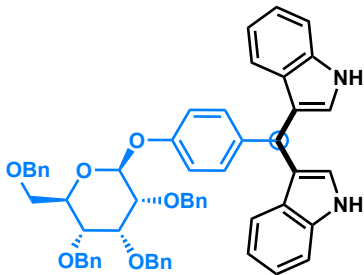

As an orange solid:  $R_f$  0.2 (PE: EA = 5:1);  $^1\text{H NMR}$  (401 MHz,  $\text{CDCl}_3$ )  $\delta$  7.89 (s, 2H), 7.42 – 7.30 (m, 15H), 7.29 – 7.26 (m, 2H), 7.25 (d,  $J = 1.9$  Hz, 2H), 7.24 – 7.21 (m, 4H), 7.20 – 7.14 (m, 5H), 7.03 – 6.98 (m, 4H), 6.57 (t,  $J = 2.5$  Hz, 3H), 5.84 (s, 1H), 5.51 (d,  $J = 7.9$  Hz, 1H), 4.96 – 4.88 (m, 2H), 4.82 (d,  $J = 11.9$  Hz, 1H), 4.73 (d,  $J = 12.1$  Hz, 1H), 4.58 (d,  $J = 12.1$  Hz, 1H), 4.53 – 4.46 (m, 2H), 4.39 (d,  $J = 11.5$  Hz, 1H), 4.24 – 4.17 (m, 2H), 3.80 (dd,  $J = 10.8, 1.9$  Hz, 1H), 3.69 (dd,  $J = 10.8, 4.9$  Hz, 1H), 3.59 – 3.50 (m, 2H).  $^{13}\text{C NMR}$  (101 MHz,  $\text{CDCl}_3$ )  $\delta$  156.02, 138.95, 138.66, 138.36, 138.08, 137.94, 136.79, 129.66, 128.55, 128.52, 128.40, 128.33, 128.16, 127.90, 127.87, 127.76, 127.58, 127.18, 123.90, 121.90, 120.07, 119.88, 119.23, 116.57, 111.19, 99.44, 78.84, 75.66, 74.85, 74.62, 73.47, 73.29, 72.67, 71.73, 69.28, 39.50. **HRMS** (EI) Calcd for  $\text{C}_{20}\text{H}_{20}\text{N}_2\text{O}_3$ :  $[\text{M}+\text{H}]^+$  861.3904. Found:  $m/z$  861.3901.

**((3aS,4R,8aS,8bS)-2,2,7,7-tetramethylhexahydrobenzo[1,2-d:3,4-d']bis([1,3]dioxole)-4-yl)methyl 4-(di(1H-indol-3-yl)methyl)benzoate 57**

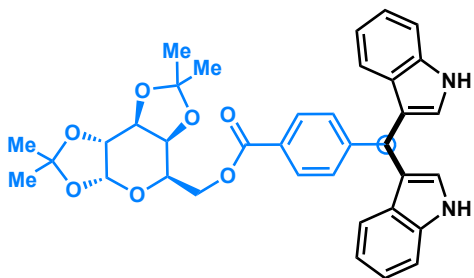

As a red solid:  $R_f$  0.35 (PE: EA = 2:1);  $^1\text{H NMR}$  (400 MHz,  $\text{CDCl}_3$ )  $\delta$  8.02 – 7.94 (m, 4H), 7.42 – 7.33 (m, 6H), 7.18 (t,  $J = 7.1$  Hz, 2H), 7.01 (t,  $J = 7.0$  Hz, 2H), 6.61 – 6.58 (m, 2H), 5.92 (s, 1H), 5.58 (d,  $J = 4.9$  Hz, 1H), 4.66 (dd,  $J = 7.9, 2.5$  Hz, 1H), 4.47 (qd,  $J = 11.5, 6.2$  Hz, 2H), 4.34 (ddd,  $J = 9.8, 6.5, 2.2$  Hz, 2H), 4.20 (ddd,  $J = 7.1, 5.1, 1.8$  Hz, 1H), 1.50 (d,  $J = 13.4$  Hz, 6H), 1.35 (d,  $J = 10.6$  Hz, 6H).  $^{13}\text{C NMR}$  (101 MHz,  $\text{CDCl}_3$ )  $\delta$  166.69, 149.78, 136.75, 129.92, 128.87, 128.05, 126.95, 123.83, 122.16, 119.85, 119.45, 118.82, 111.28, 109.79, 108.96, 96.42, 71.20, 70.79, 70.60, 66.21, 63.83, 40.35, 26.17, 26.09, 25.09, 24.59. **HRMS** (EI) Calcd for  $\text{C}_{43}\text{H}_{58}\text{N}_2$ :  $[\text{M}+\text{H}]^+$  609.2601. Found:  $m/z$  609.2608.

**(E)-3,3'-((4-(octadec-9-en-1-yloxy)phenyl)methylene)bis(3a,7a-dihydro-1H-indole)**

**58**

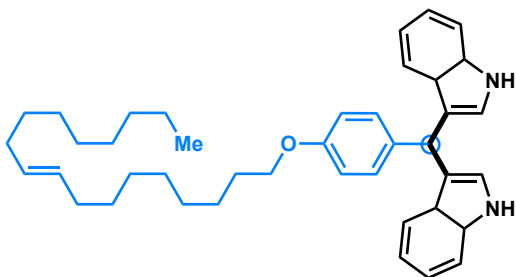

As an orange solid:  $R_f$  0.35 (PE: EA = 5:1);  $^1\text{H NMR}$  (400 MHz,  $\text{CDCl}_3$ )  $\delta$  7.78 (s, 2H), 7.42 (d,  $J = 7.9$  Hz, 2H), 7.33 (d,  $J = 8.1$  Hz, 2H), 7.25 (d,  $J = 8.3$  Hz, 2H), 7.19 (t,  $J =$

7.5 Hz, 2H), 7.03 (t,  $J = 7.5$  Hz, 2H), 6.83 (d,  $J = 8.5$  Hz, 2H), 6.59 (s, 2H), 5.85 (s, 1H), 5.42 – 5.38 (m, 1H), 3.94 (t,  $J = 6.5$  Hz, 2H), 2.06 (d,  $J = 6.3$  Hz, 3H), 1.79 (p,  $J = 6.8$  Hz, 2H), 1.48 (s, 2H), 1.33 (d,  $J = 19.2$  Hz, 23H), 0.97 – 0.89 (m, 3H).  $^{13}\text{C}$  NMR (101 MHz,  $\text{CDCl}_3$ )  $\delta$  157.59, 136.78, 136.11, 130.12, 130.00, 129.69, 127.17, 123.68, 121.98, 120.13, 119.28, 114.24, 111.16, 68.48, 39.43, 32.06, 29.91, 29.86, 29.68, 29.63, 29.56, 29.53, 29.48, 29.40, 27.36, 26.25, 22.85, 14.30. **HRMS** (EI) Calcd for  $\text{C}_{21}\text{H}_{22}\text{N}_2\text{O}_4$ :  $[\text{M}+\text{H}]^+$  593.4471. Found:  $m/z$  593.4463.

**(2S,5S,8R,9S,10S,13S,14S)-10,13-dimethyl-17-oxohexadecahydro-1H-cyclopenta[a]phenanthren-2-yl 4-(di(1H-indol-3-yl)methyl)benzoate 59**

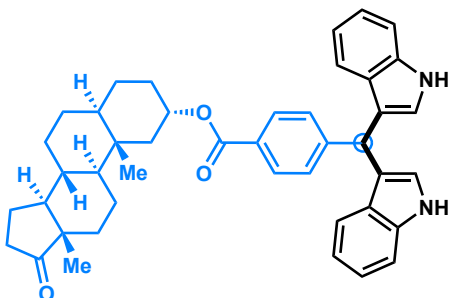

As a red solid:  $R_f$  0.35 (PE: EA = 2:1);  $^1\text{H}$  NMR (401 MHz,  $\text{CDCl}_3$ )  $\delta$  8.07 (d,  $J = 2.5$  Hz, 2H), 7.99 (d,  $J = 8.3$  Hz, 2H), 7.43 (d,  $J = 8.3$  Hz, 2H), 7.37 (t,  $J = 8.1$  Hz, 4H), 7.18 (ddd,  $J = 8.1, 7.0, 1.2$  Hz, 2H), 7.06 – 6.98 (m, 2H), 6.68 – 6.62 (m, 2H), 5.95 (s, 1H), 5.28 (s, 1H), 2.45 (dd,  $J = 19.2, 8.6$  Hz, 1H), 2.07 (dt,  $J = 18.3, 9.0$  Hz, 1H), 1.98 – 1.65 (m, 7H), 1.64 – 1.44 (m, 6H), 1.41 – 1.19 (m, 7H), 1.02 (qd,  $J = 12.0, 5.6$  Hz, 1H), 0.87 (d,  $J = 3.9$  Hz, 6H).  $^{13}\text{C}$  NMR (101 MHz,  $\text{CDCl}_3$ )  $\delta$  221.88, 166.15, 149.57, 136.79, 129.74, 129.11, 128.87, 126.97, 123.83, 123.79, 122.16, 119.86, 119.43, 118.84, 111.30, 70.42, 54.49, 51.52, 47.96, 40.52, 40.36, 36.14, 36.00, 35.10, 33.27, 33.06, 31.62, 30.82,



28.14, 26.39, 21.84, 20.19, 13.94, 11.52. **HRMS** (EI) Calcd for C<sub>43</sub>H<sub>46</sub>N<sub>2</sub>O<sub>3</sub>: [M+H]<sup>+</sup> 639.3587. Found: m/z 639.3587.

**(5S,8S,9S,10S,13S,14R,17S)-3,3-di(1H-indol-3-yl)-10,13-dimethylhexadecahydro-1H-cyclopenta[a]phenanthren-17-ol 60**

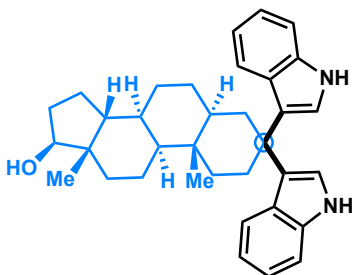

As a white solid: *R<sub>f</sub>* 0.30 (PE: EA = 2:1); **<sup>1</sup>H NMR** (400 MHz, DMSO-*d*<sub>6</sub>) δ 10.74 (s, 1H), 10.61 (s, 1H), 7.42 (d, *J* = 2.4 Hz, 1H), 7.32 (d, *J* = 8.1 Hz, 1H), 7.26 (d, *J* = 8.1 Hz, 1H), 7.22 (d, *J* = 8.0 Hz, 1H), 7.17 (d, *J* = 8.9 Hz, 1H), 7.08 (d, *J* = 2.5 Hz, 1H), 6.84 (q, *J* = 7.5, 7.0 Hz, 2H), 6.64 (t, *J* = 7.1 Hz, 2H), 4.38 (d, *J* = 4.8 Hz, 1H), 3.31 (d, *J* = 2.3 Hz, 1H), 2.75 (d, *J* = 13.5 Hz, 1H), 2.40 (d, *J* = 13.3 Hz, 1H), 2.02 (q, *J* = 11.7, 11.0 Hz, 2H), 1.75 (dt, *J* = 9.4, 5.4 Hz, 1H), 1.66 (d, *J* = 12.5 Hz, 1H), 1.59 – 1.50 (m, 2H), 1.46 (d, *J* = 11.2 Hz, 1H), 1.36 (s, 2H), 1.35 – 1.24 (m, 3H), 1.18 (d, *J* = 12.7 Hz, 3H), 1.11 – 1.01 (m, 1H), 0.86 (s, 4H), 0.78 (dd, *J* = 11.2, 7.3 Hz, 1H), 0.73 – 0.63 (m, 1H), 0.58 (s, 3H), 0.54 – 0.45 (m, 1H). **<sup>13</sup>C NMR** (101 MHz, DMSO-*d*<sub>6</sub>) δ 137.51, 137.41, 126.64, 126.16, 125.91, 124.16, 121.11, 120.89, 120.76, 120.62, 120.56, 119.53, 118.01, 117.91, 111.85, 82.47, 80.58, 55.02, 51.10, 43.08, 42.07, 39.47, 38.98, 37.08, 36.57, 35.81, 35.66, 33.14, 31.84, 30.34, 28.78, 23.57, 20.69, 12.91, 11.88. **HRMS** (EI) Calcd for C<sub>35</sub>H<sub>42</sub>N<sub>2</sub>O: [M+H]<sup>+</sup> 507.3375. Found: m/z 507.3369.

**3,3'-((5S,8R,9S,10S,13R,14S,17R)-10,13-dimethyl-17-((R)-6-methylheptan-2-yl)hexadecahydro-1H-cyclopenta[a]phenanthrene-3,3'-diyl)bis(1H-indole) 61**

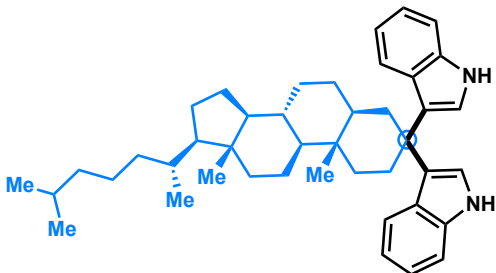

As a brown solid:  $R_f$  0.2 (PE: EA = 10:1);  $^1\text{H NMR}$  (400 MHz,  $\text{CDCl}_3$ )  $\delta$  7.98 (s, 1H), 7.73 (s, 1H), 7.62 (d,  $J = 8.0$  Hz, 1H), 7.47 (d,  $J = 8.1$  Hz, 1H), 7.31 (d,  $J = 7.7$  Hz, 2H), 7.24 (d,  $J = 6.4$  Hz, 1H), 7.10 – 7.01 (m, 2H), 6.96 – 6.79 (m, 3H), 2.70 (d,  $J = 11.3$  Hz, 1H), 2.44 – 2.24 (m, 3H), 1.95 (dt,  $J = 12.6, 3.4$  Hz, 1H), 1.85 – 1.71 (m, 1H), 1.69 – 1.56 (m, 2H), 1.56 – 1.40 (m, 6H), 1.38 – 1.28 (m, 5H), 1.23 (t,  $J = 13.2$  Hz, 3H), 1.12 (d,  $J = 39.5$  Hz, 4H), 1.05 (s, 6H), 0.93 – 0.84 (m, 9H), 0.79 (d,  $J = 4.7$  Hz, 1H), 0.65 (s, 3H), 0.62 – 0.55 (m, 1H).  $^{13}\text{C NMR}$  (101 MHz,  $\text{CDCl}_3$ )  $\delta$  137.21, 137.03, 126.86, 125.98, 123.16, 121.90, 121.31, 121.27, 121.18, 121.05, 120.79, 118.66, 118.62, 111.25, 111.09, 56.64, 56.38, 54.61, 42.70, 41.93, 40.14, 40.04, 39.61, 38.83, 36.46, 36.28, 35.92, 35.67, 35.59, 32.79, 32.06, 28.84, 28.36, 28.11, 24.27, 23.97, 22.94, 22.68, 21.04, 18.78, 12.88, 12.19. **HRMS** (EI) Calcd for  $\text{C}_{43}\text{H}_{58}\text{N}_2$ :  $[\text{M}+\text{H}]^+$  603.4678. Found:  $m/z$  603.4670.

### 1-(5,5-di(1H-indol-3-yl)hexyl)-3,7-dimethyl-3,4,5,7-tetrahydro-1H-purine-2,6-dione

62

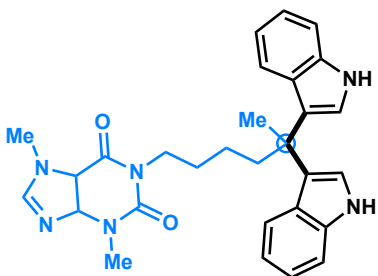

As a grey solid:  $R_f$  0.35 (PE: EA = 1:1);  $^1\text{H NMR}$  (401 MHz,  $\text{CDCl}_3$ )  $\delta$  7.98 (d,  $J = 8.7$  Hz, 2H), 7.45 (d,  $J = 4.8$  Hz, 1H), 7.34 (d,  $J = 8.1$  Hz, 2H), 7.28 (d,  $J = 8.2$  Hz, 2H), 7.03 (t,  $J = 8.1$  Hz, 4H), 6.82 (t,  $J = 8.1$  Hz, 2H), 3.97 – 3.86 (m, 5H), 3.54 (s, 3H), 2.45 – 2.37 (m, 2H), 1.83 (s, 3H), 1.62 (q,  $J = 7.7$  Hz, 2H), 1.31 – 1.19 (m, 2H).  $^{13}\text{C NMR}$  (101 MHz,  $\text{CDCl}_3$ )  $\delta$  154.84, 151.53, 148.74, 141.43, 137.11, 126.49, 124.24, 121.34, 118.65, 111.05, 107.76, 41.56, 40.25, 38.48, 33.62, 29.76, 28.61, 27.06, 22.19. **HRMS** (EI) Calcd for  $\text{C}_{21}\text{H}_{22}\text{N}_2\text{O}_4$ :  $[\text{M}+\text{H}]^+$  497.2665. Found:  $m/z$  497.2668.

### 4-(1,1-di(1H-indol-3-yl)ethyl)-N,N-dipropylbenzenesulfonamide 63

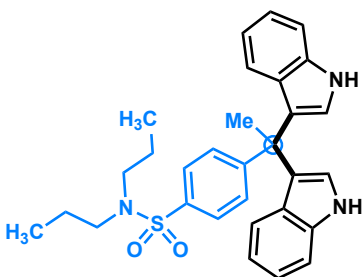

As a brown solid:  $R_f$  0.2 (PE: EA = 5:1);  $^1\text{H NMR}$  (400 MHz,  $\text{CDCl}_3$ )  $\delta$  7.98 (s, 2H), 7.67 (d,  $J = 8.6$  Hz, 2H), 7.52 (d,  $J = 8.6$  Hz, 2H), 7.36 (d,  $J = 8.2$  Hz, 2H), 7.24 (d,  $J = 9.1$  Hz, 2H), 7.18 – 7.12 (m, 2H), 6.98 – 6.90 (m, 2H), 6.61 (d,  $J = 2.4$  Hz, 2H), 3.11 – 3.02 (m, 4H), 2.36 (s, 3H), 1.51 (h,  $J = 7.4$  Hz, 4H), 0.83 (t,  $J = 7.4$  Hz, 6H).  $^{13}\text{C NMR}$

(101 MHz, CDCl<sub>3</sub>) δ 153.01, 137.64, 137.20, 128.87, 126.73, 126.19, 123.71, 123.51, 121.85, 121.81, 119.20, 111.44, 49.83, 44.47, 28.78, 22.36, 11.29. **HRMS** (EI) Calcd for C<sub>30</sub>H<sub>33</sub>N<sub>3</sub>O<sub>2</sub>S: [M+H]<sup>+</sup> 500.2372. Found: m/z 500.2373.

## 10. Spectra for compounds

$^1\text{H}$  NMR 400 MHz,  $\text{CDCl}_3$

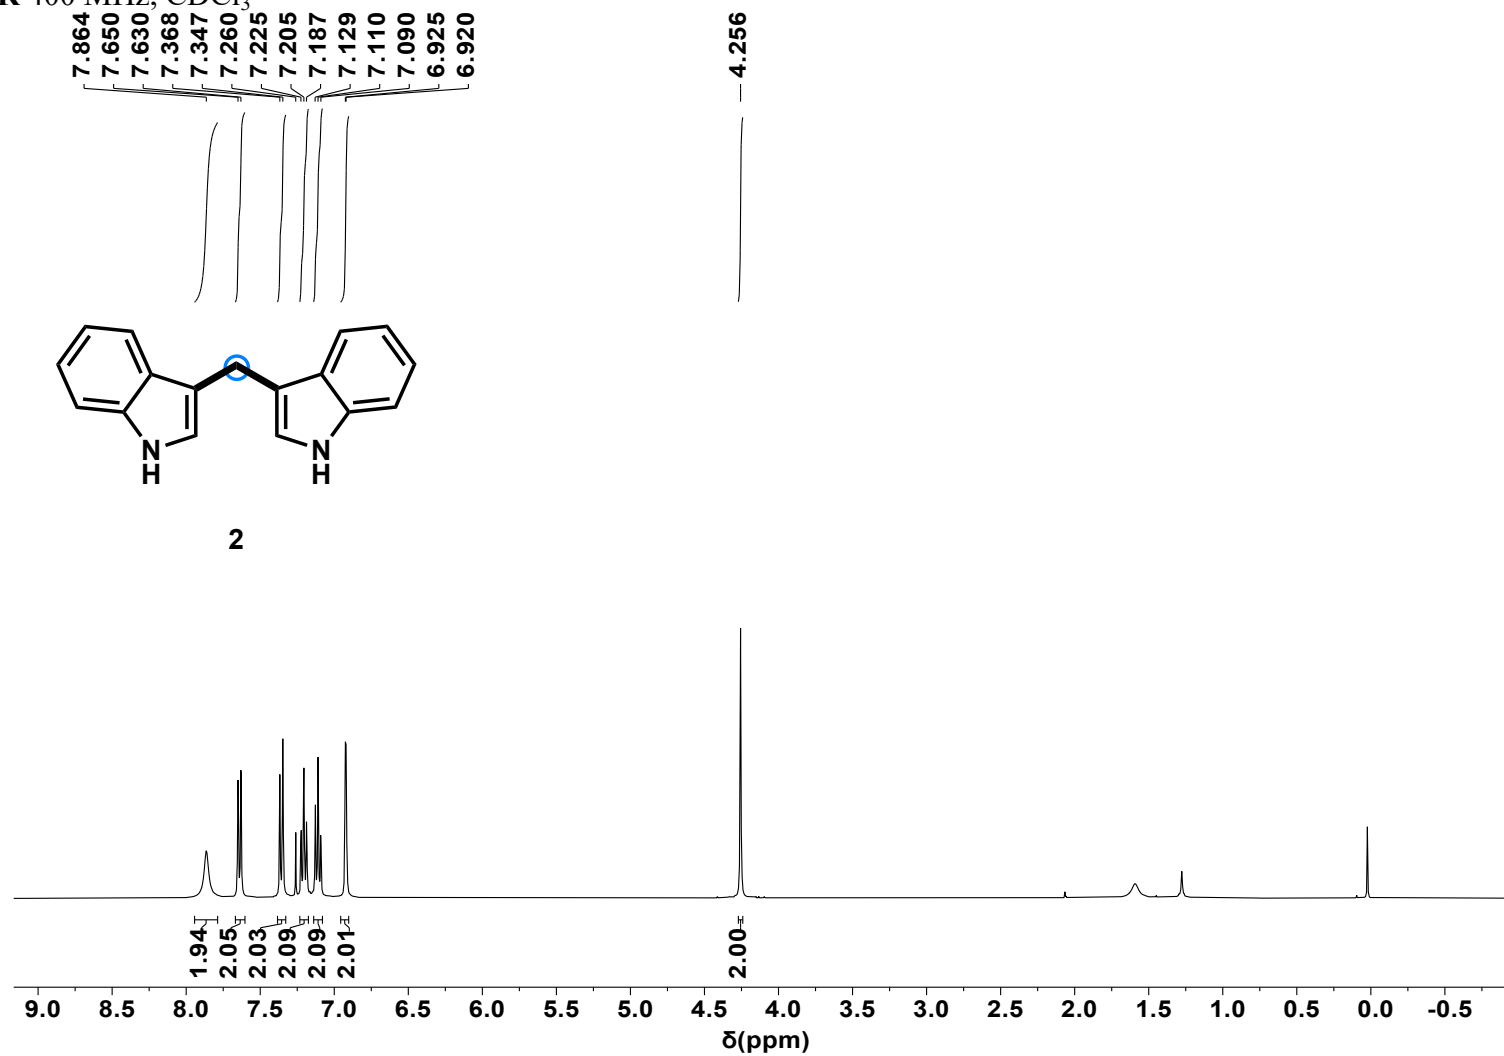

$^{13}\text{C}$  NMR 101 MHz,  $\text{CDCl}_3$

136.538  
127.655  
122.306  
121.987  
119.324  
119.271  
115.762  
111.149

77.450  
77.134  
76.815

21.302

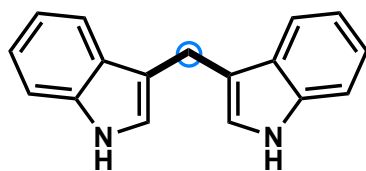

2

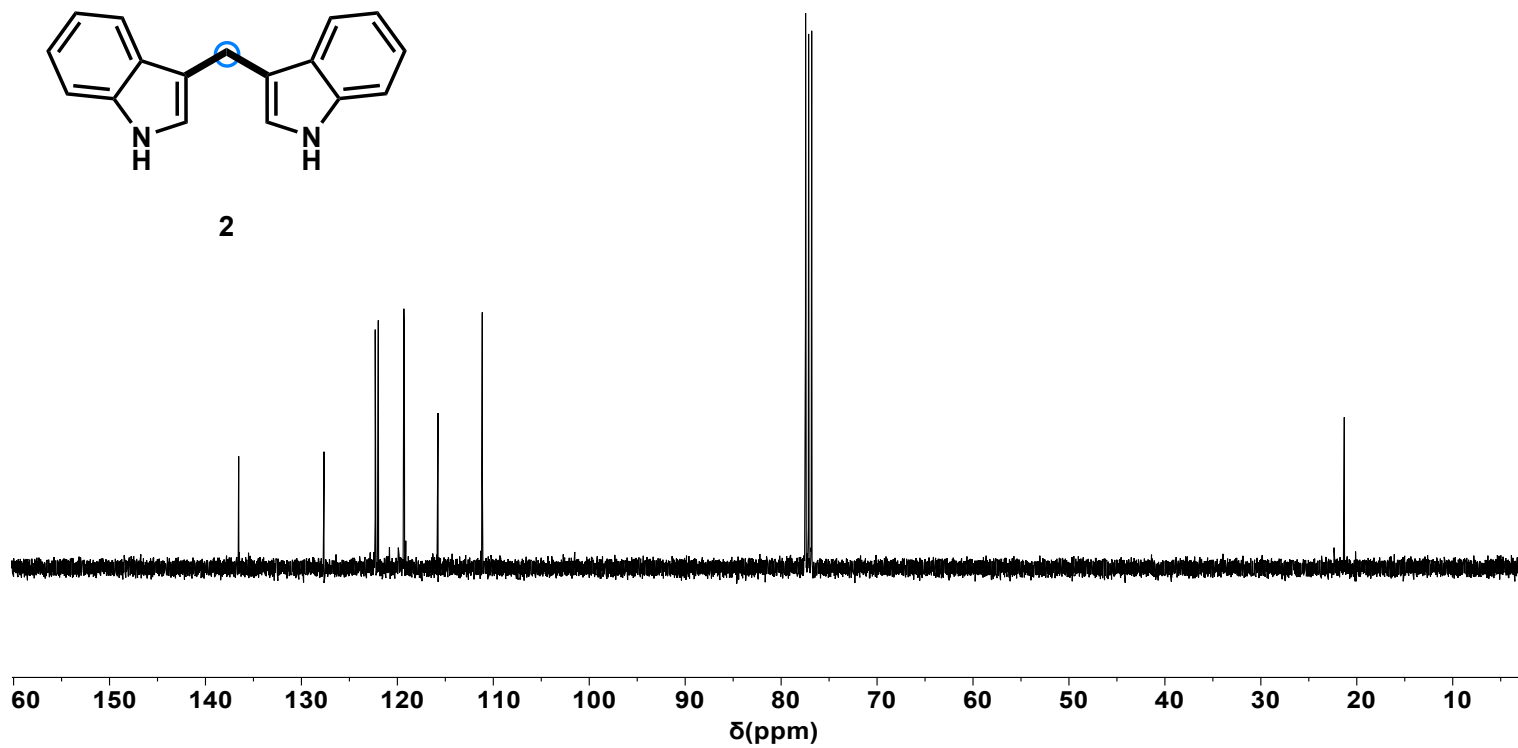

$^1\text{H}$  NMR 400 MHz,  $\text{CDCl}_3$

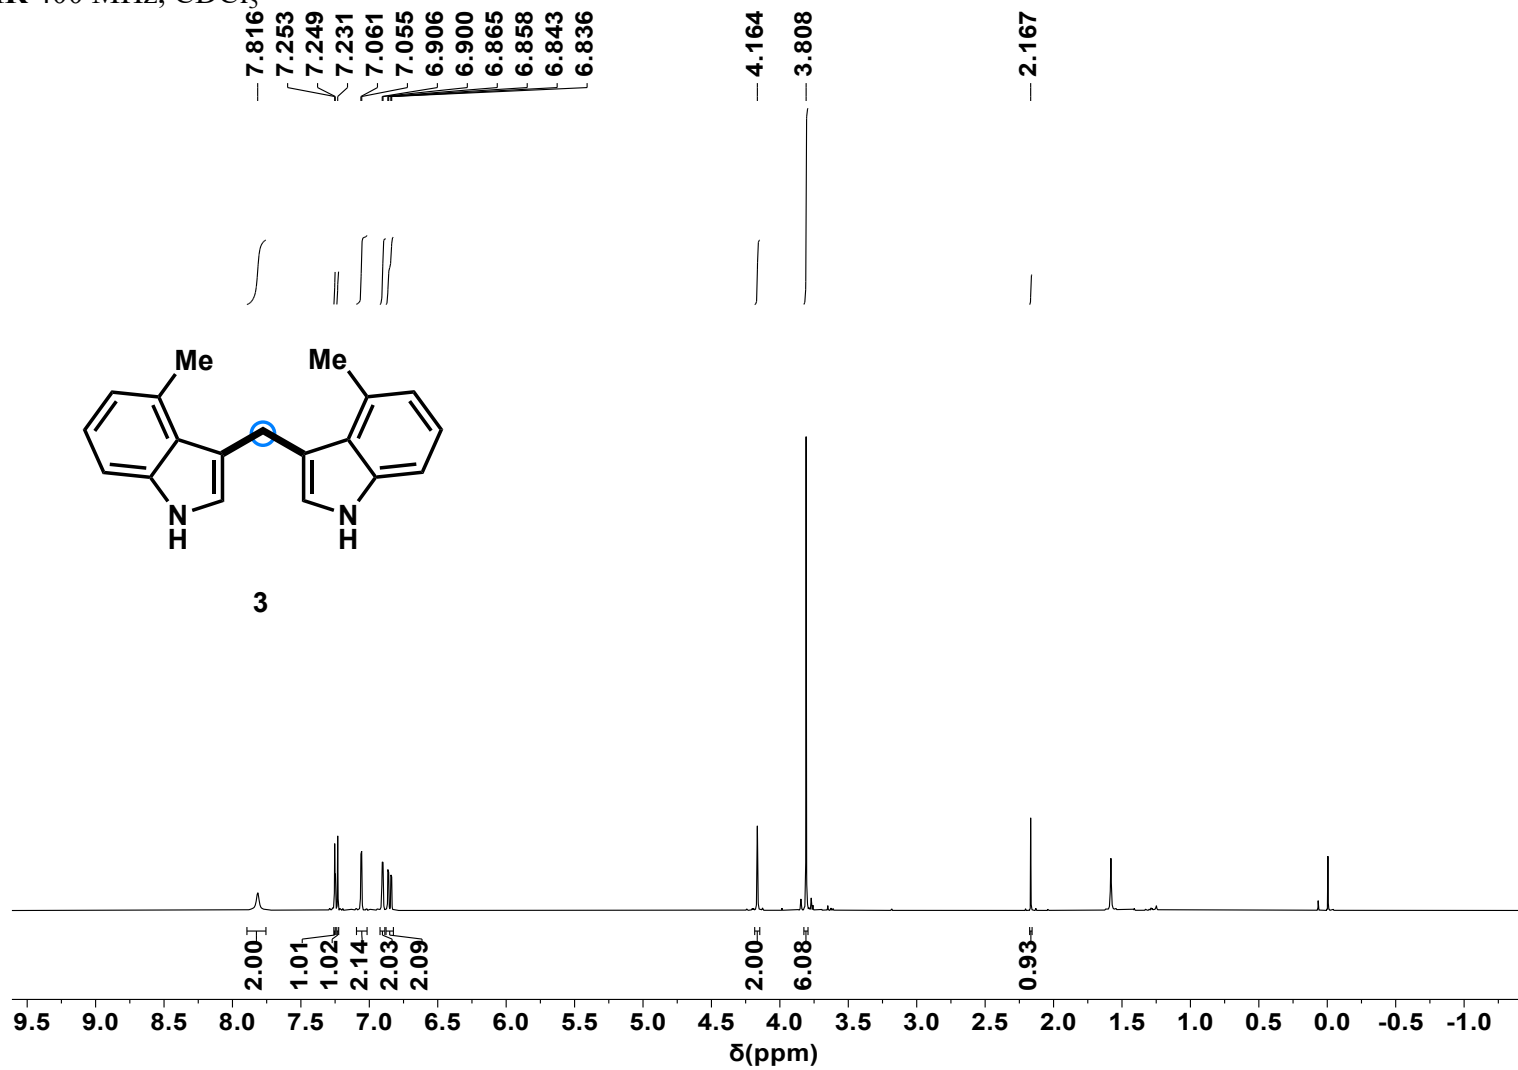

$^{13}\text{C}$  NMR 101 MHz,  $\text{CDCl}_3$

137.0783  
131.437  
126.005  
123.075  
122.105  
120.819  
117.592  
109.123

25.876  
20.212

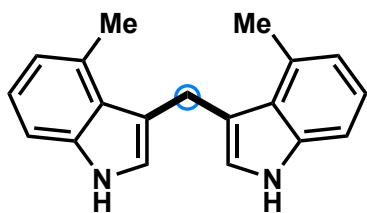

3

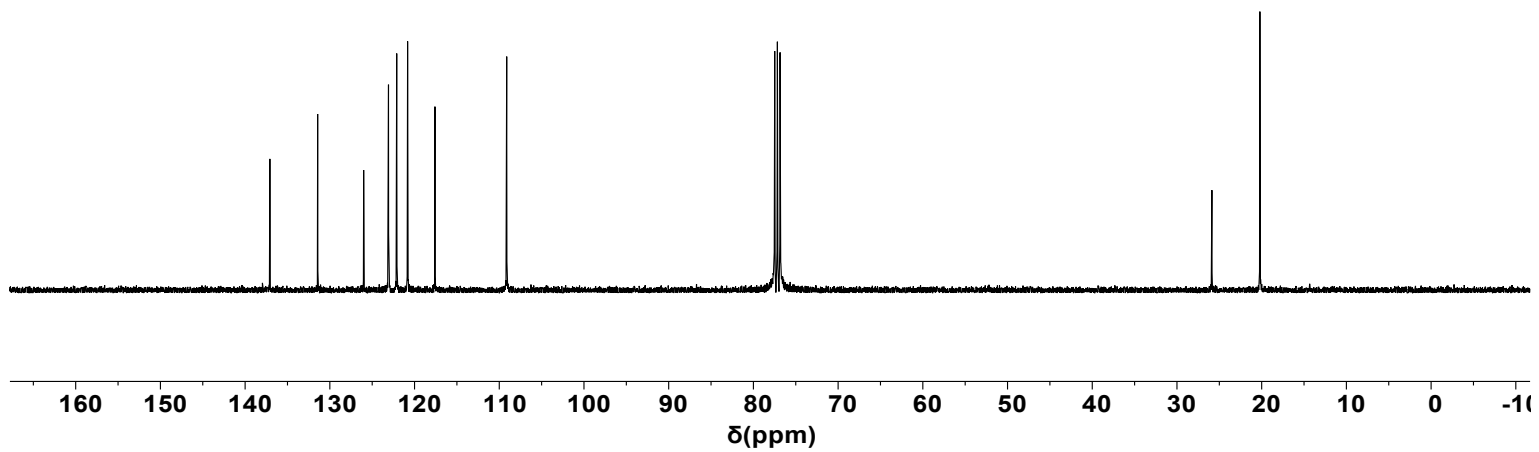



$^1\text{H}$  NMR 400 MHz,  $\text{CDCl}_3$

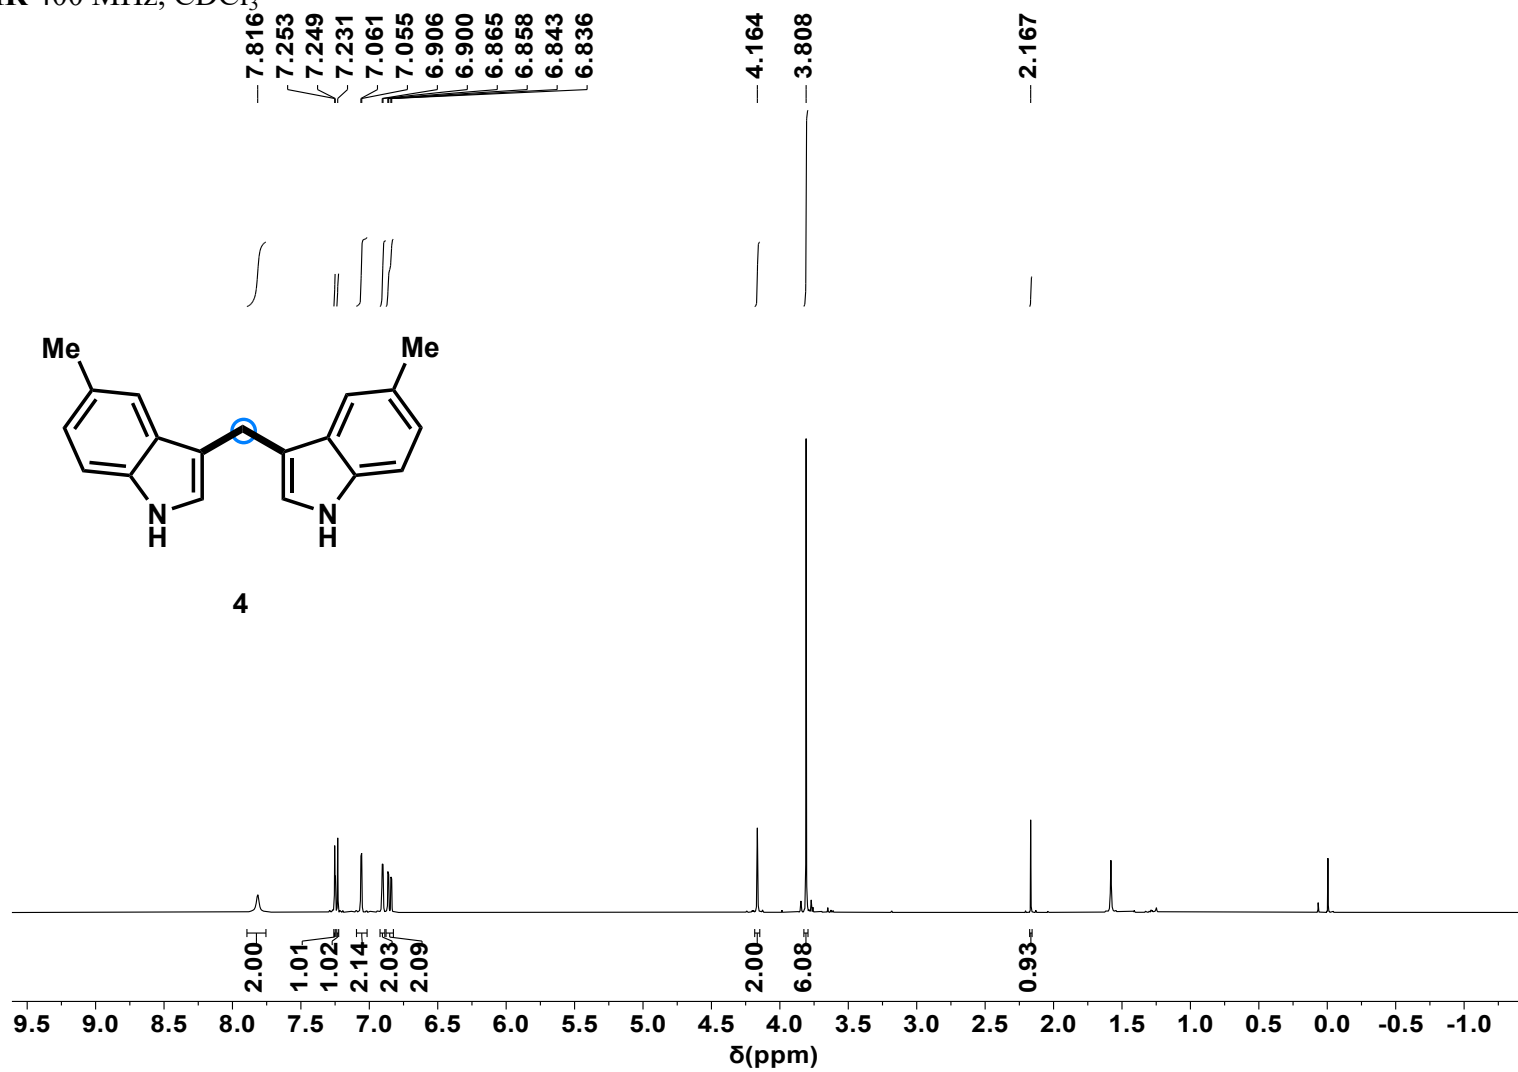

$^{13}\text{C}$  NMR 101 MHz,  $\text{CDCl}_3$

134.890  
128.463  
127.896  
123.577  
122.546  
118.960  
115.264  
110.824

21.626  
21.264

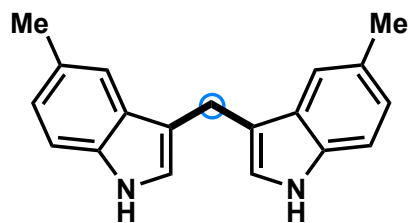

4

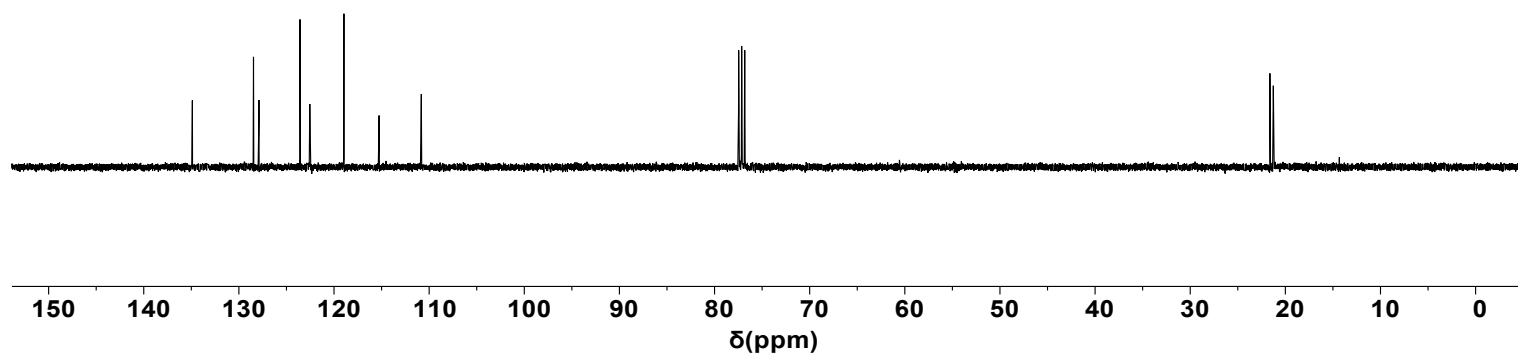

$^1\text{H}$  NMR 400 MHz,  $\text{CDCl}_3$

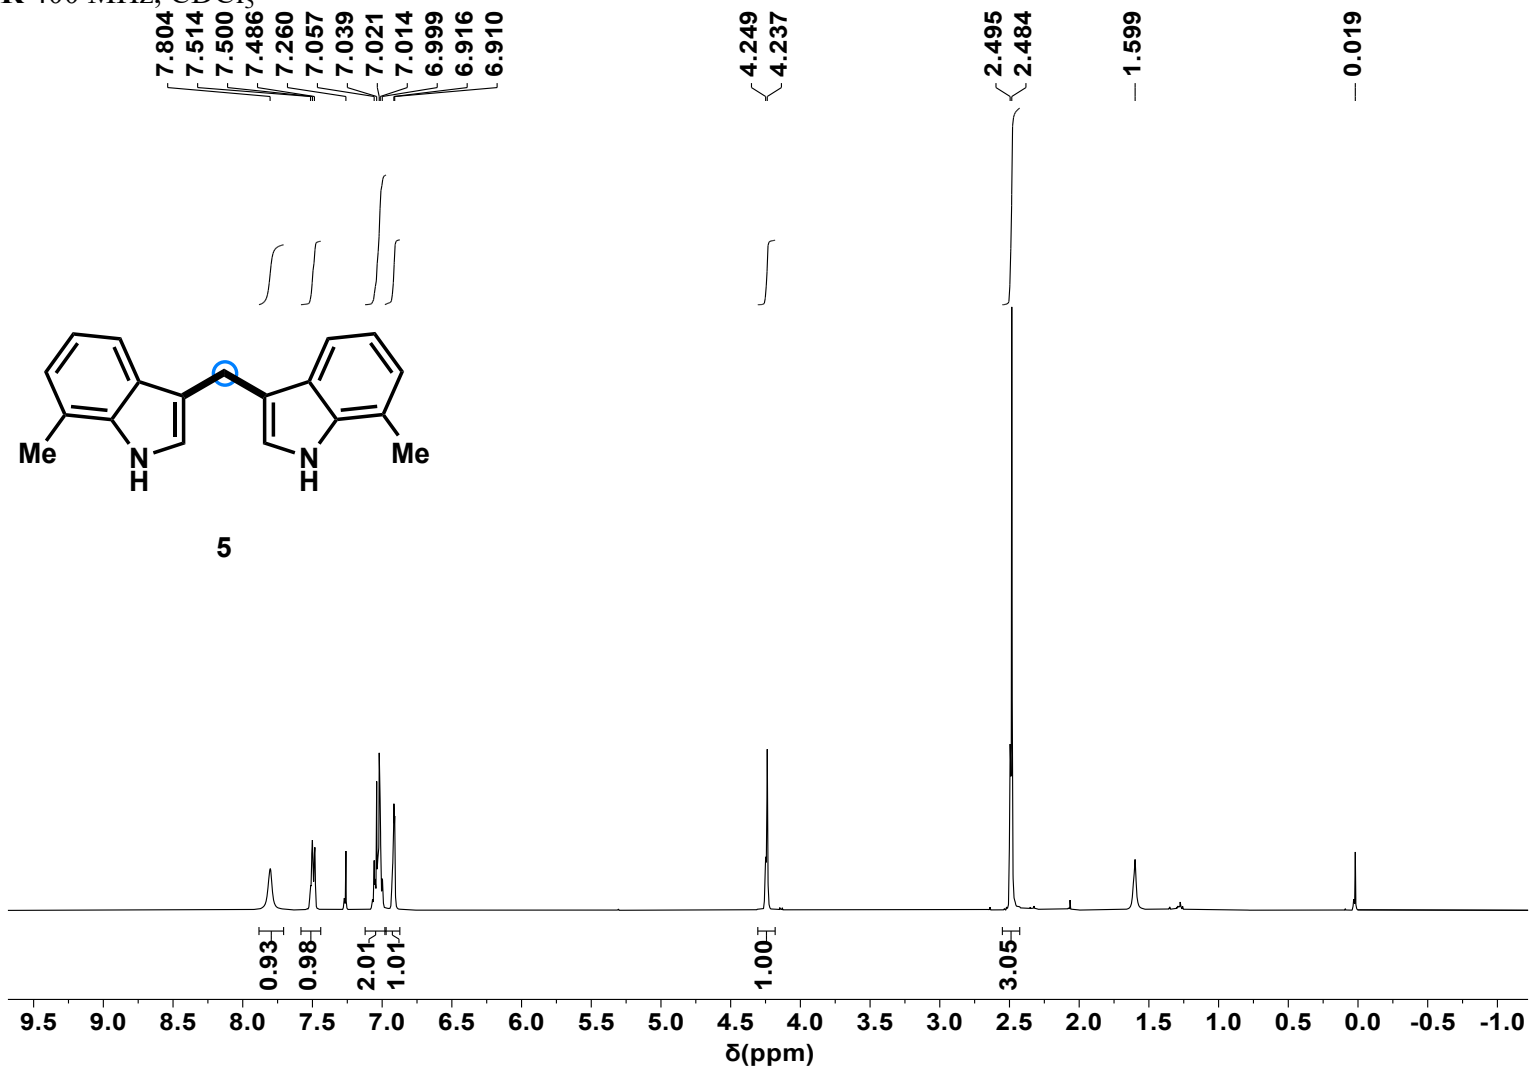

$^{13}\text{C}$  NMR 101 MHz,  $\text{CDCl}_3$

136.089  
127.179  
122.493  
122.033  
120.303  
119.477  
117.072  
116.317

21.546  
16.730

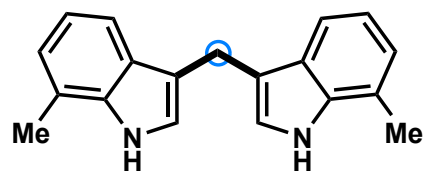

5

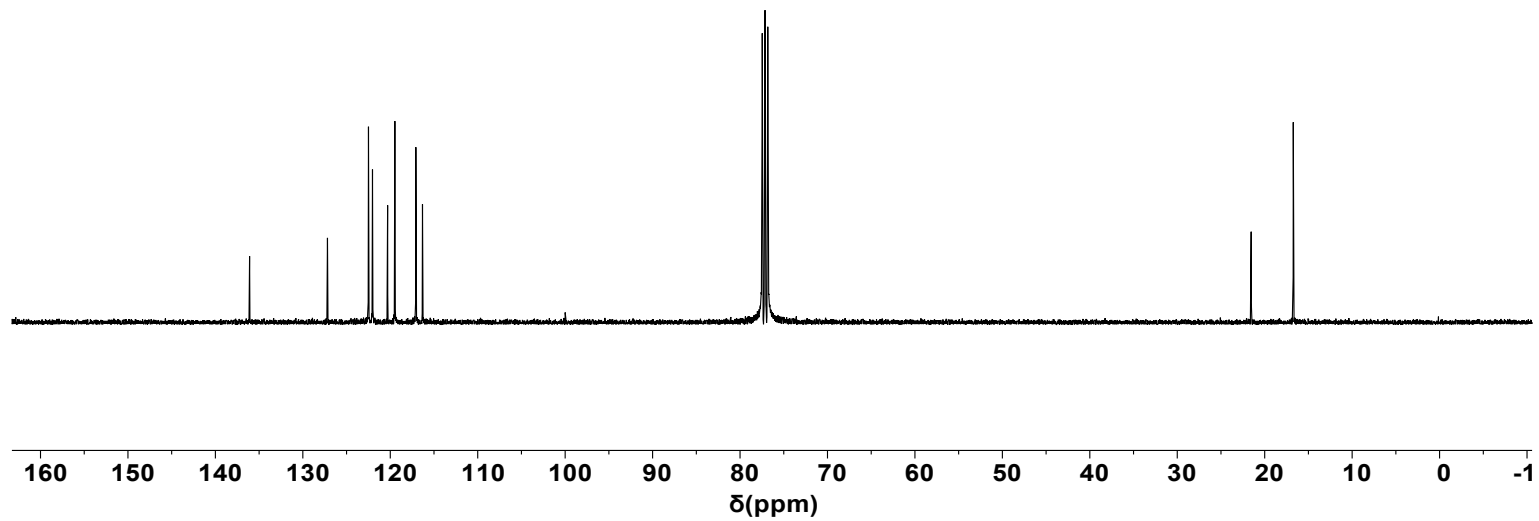

$^1\text{H}$  NMR 400 MHz,  $\text{CDCl}_3$

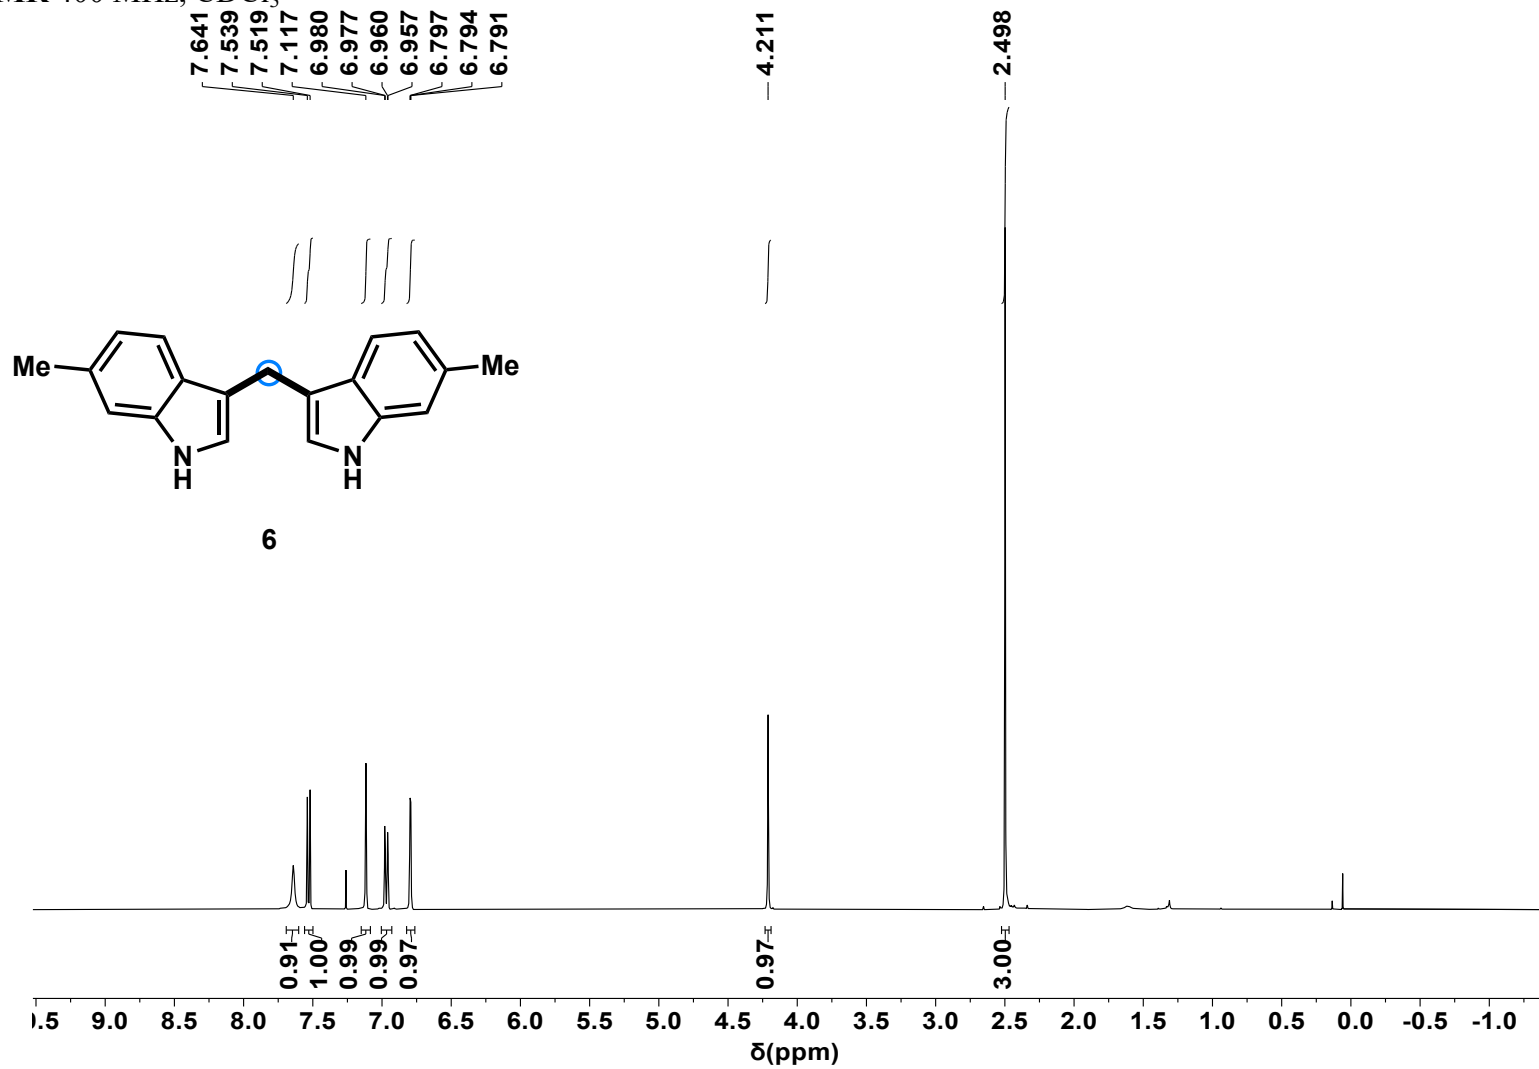

$^{13}\text{C}$  NMR 101 MHz,  $\text{CDCl}_3$

136.994  
131.723  
125.557  
121.694  
121.019  
119.009  
115.650  
111.159

21.857  
21.397

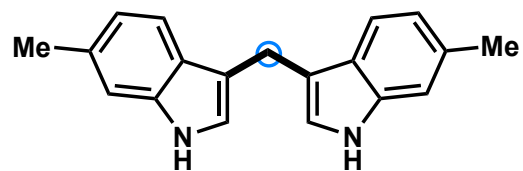

6

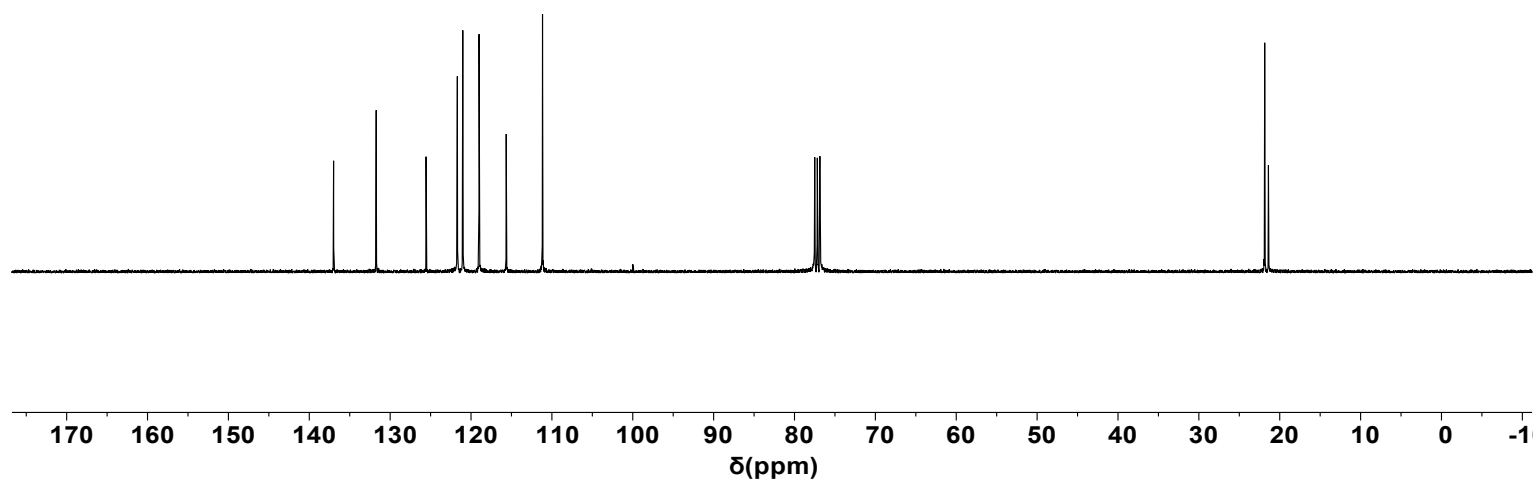

$^1\text{H}$  NMR 400 MHz,  $\text{CDCl}_3$

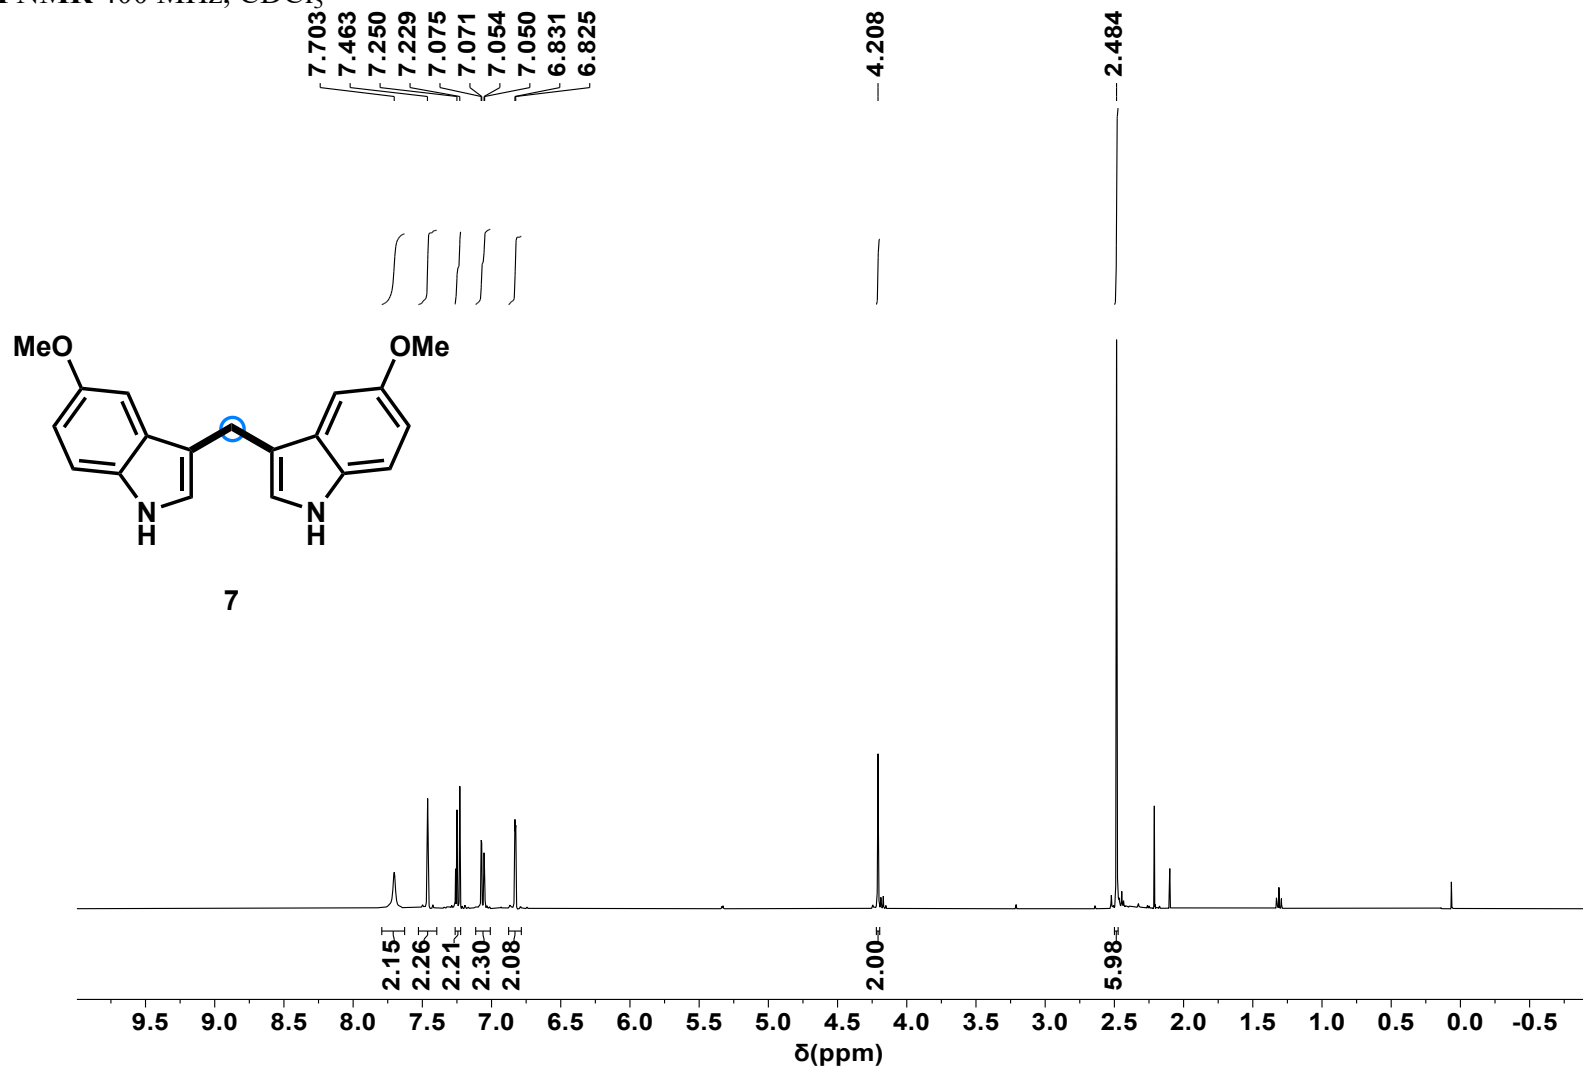

$^{13}\text{C}$  NMR 101 MHz,  $\text{CDCl}_3$

— 153.886

— 131.676

— 127.992

— 123.184

— 115.334

— 112.144

— 111.901

— 101.073

— 56.020

— 21.392

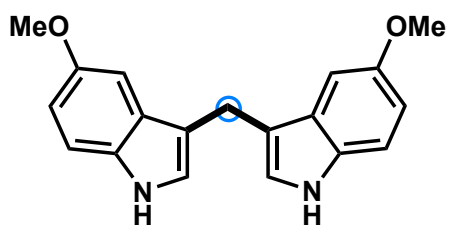

7

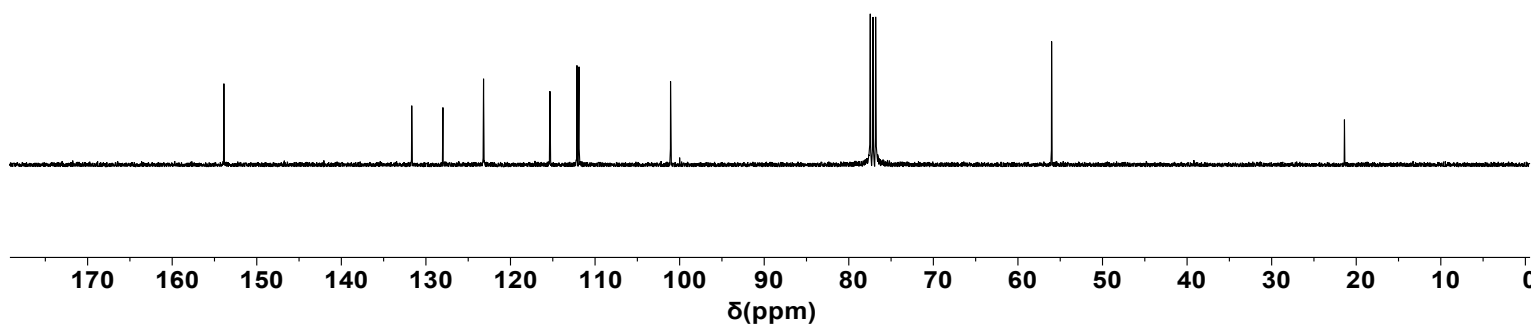



$^1\text{H}$  NMR 400 MHz,  $\text{CDCl}_3$

7.941  
7.099  
7.096  
7.083  
7.079  
7.070  
7.063  
7.051  
7.043  
7.031  
6.945  
6.771  
6.766  
6.754  
6.749  
6.743  
6.740  
6.725  
6.722  
4.437

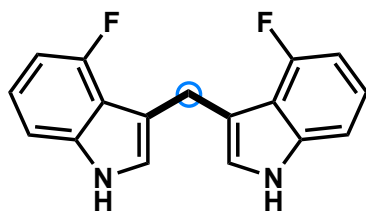

8

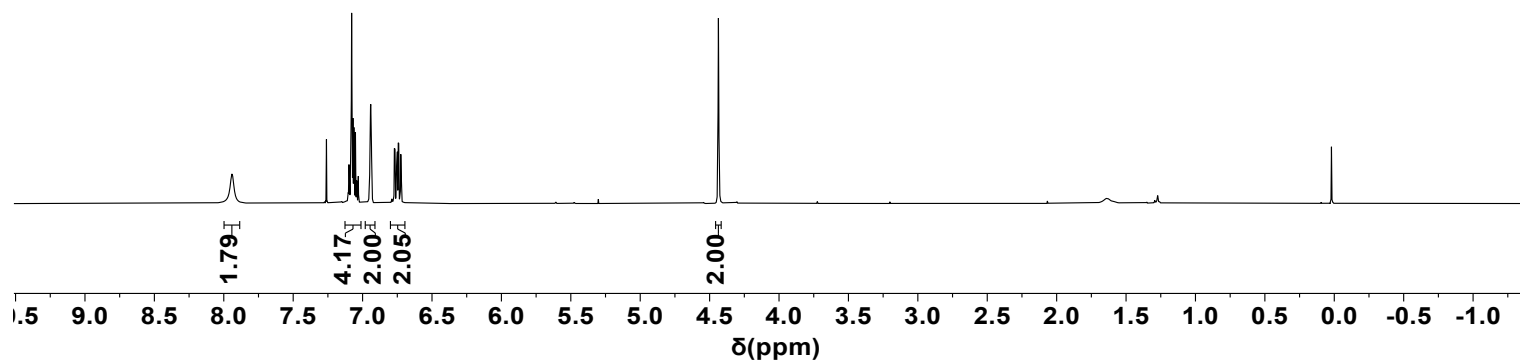

$^{13}\text{C}$  NMR 101 MHz,  $\text{CDCl}_3$

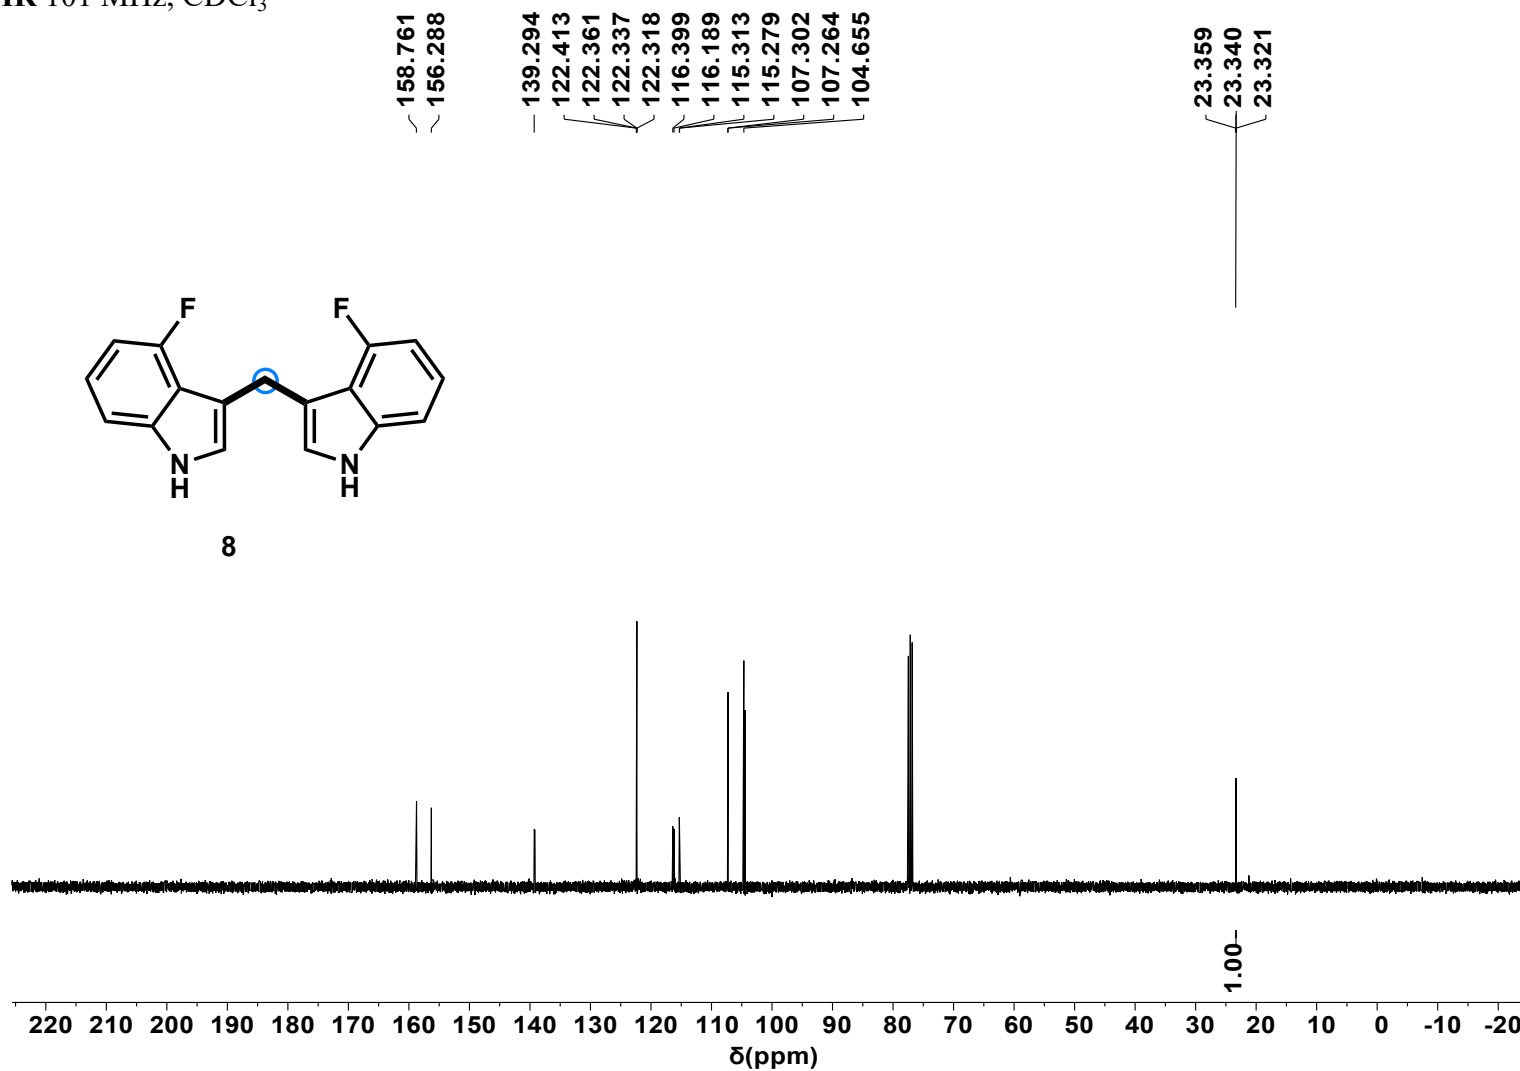

$^{19}\text{F}$  NMR 376 MHz,  $\text{CDCl}_3$

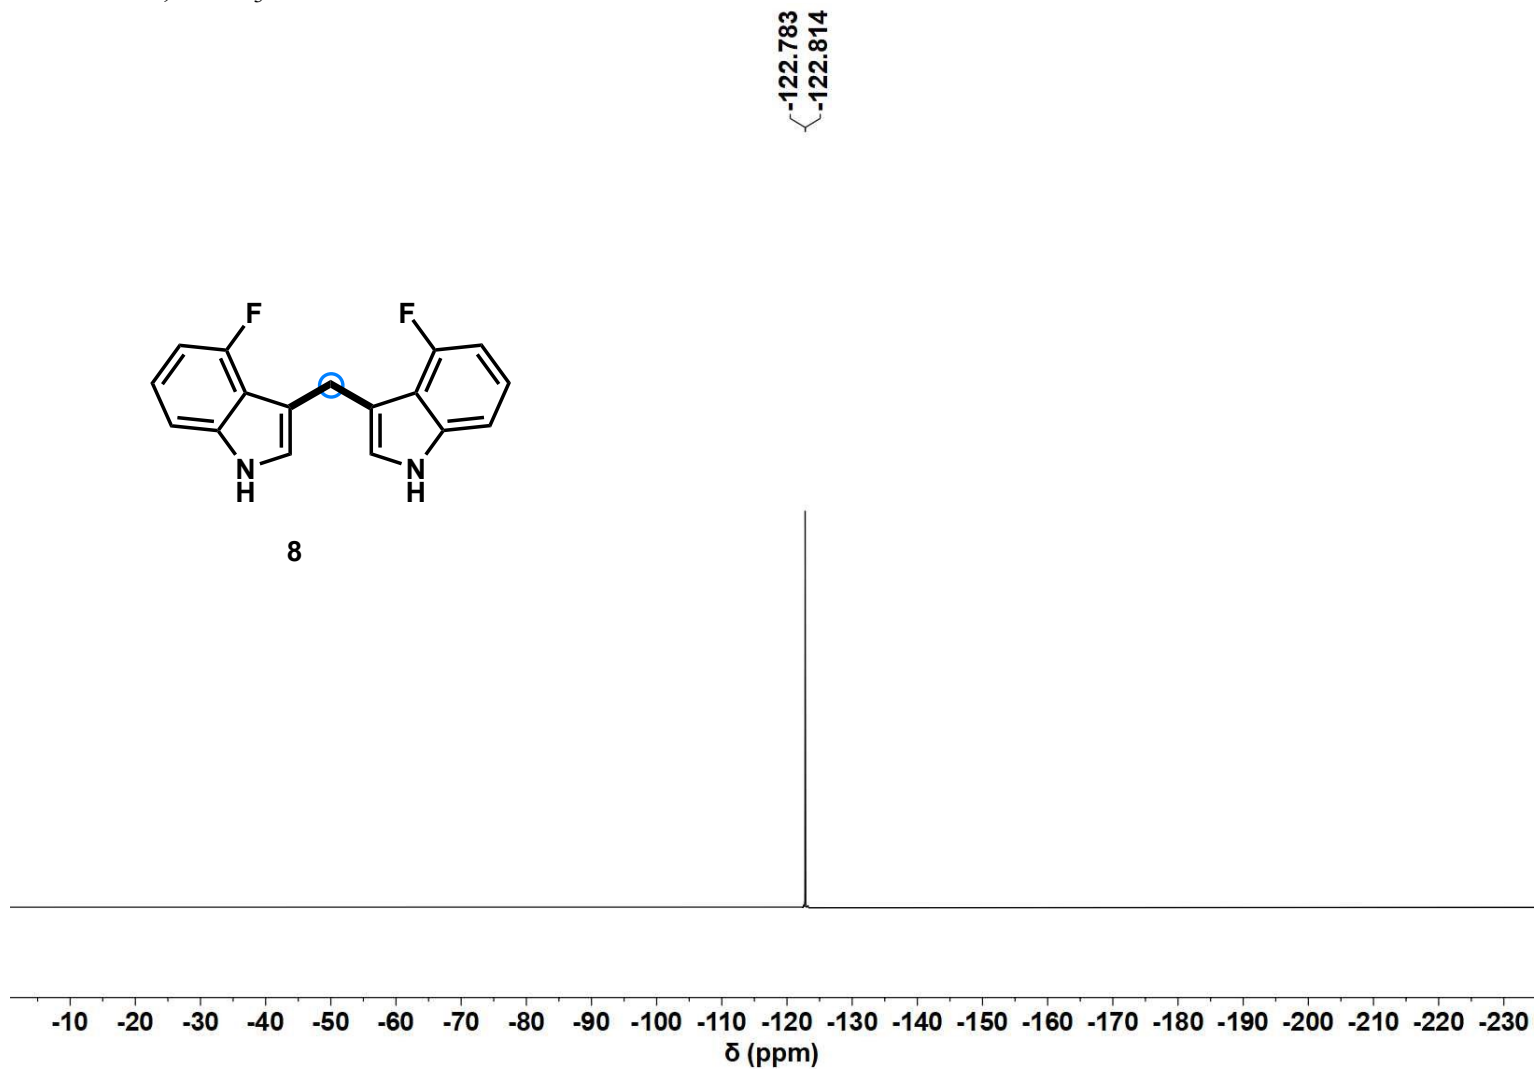

$^1\text{H}$  NMR 400 MHz,  $\text{CDCl}_3$

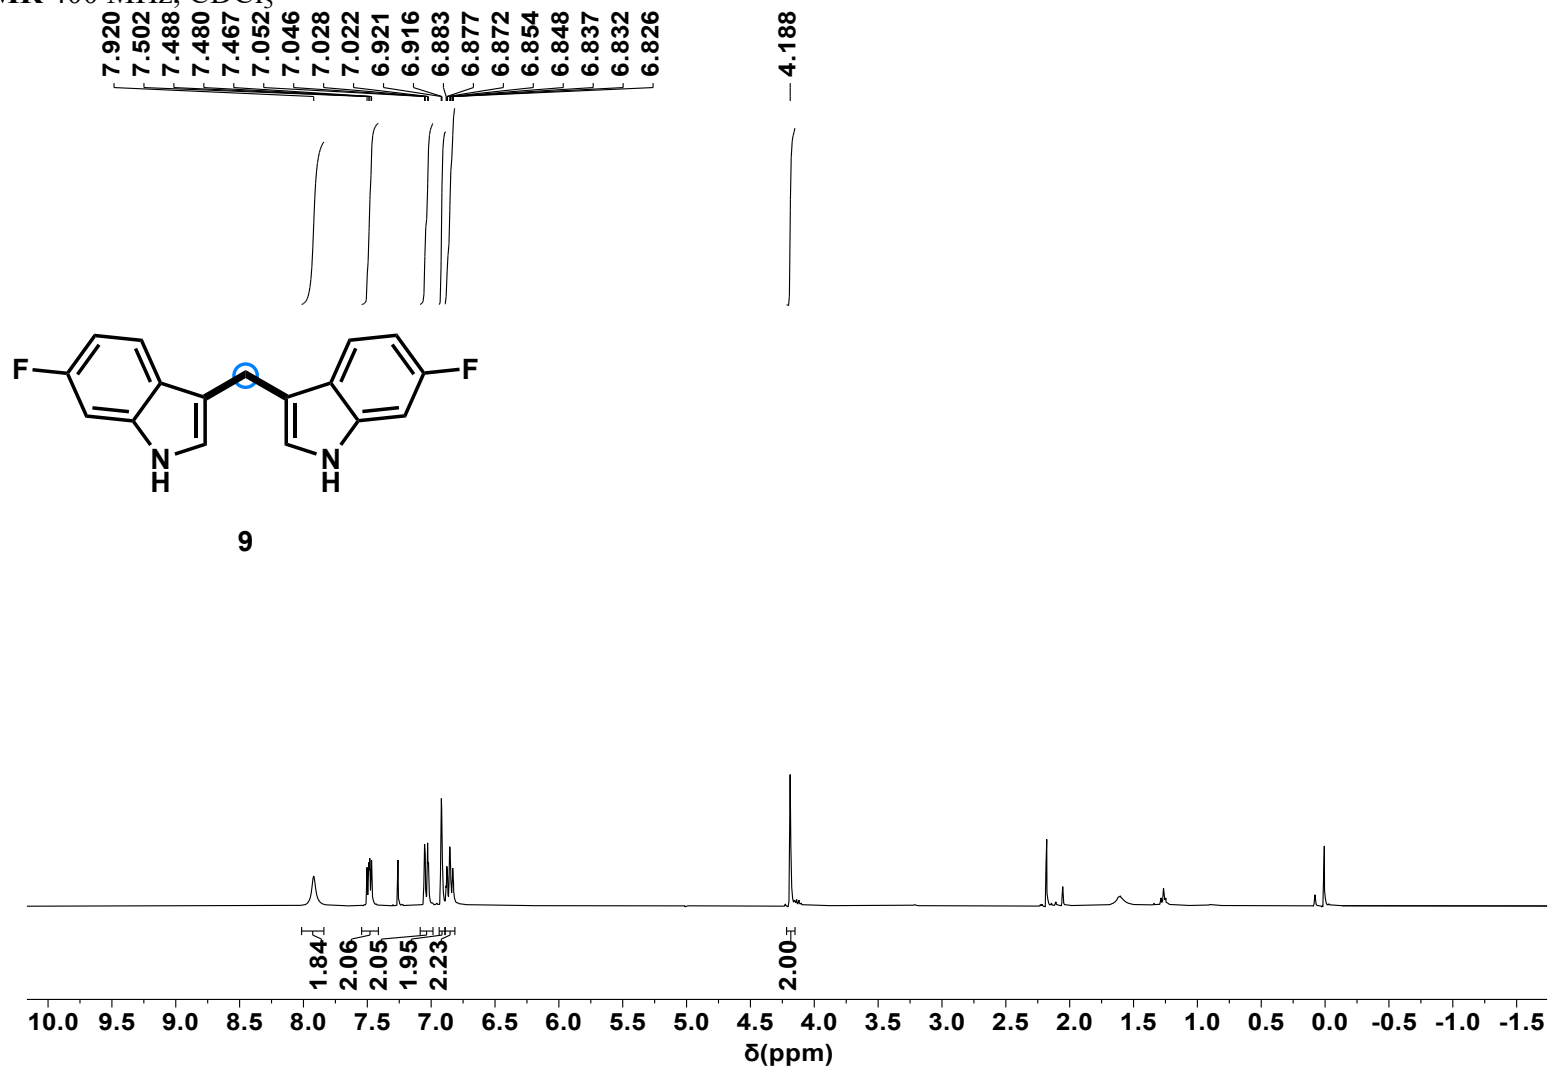

$^{13}\text{C}$  NMR 101 MHz,  $\text{CDCl}_3$

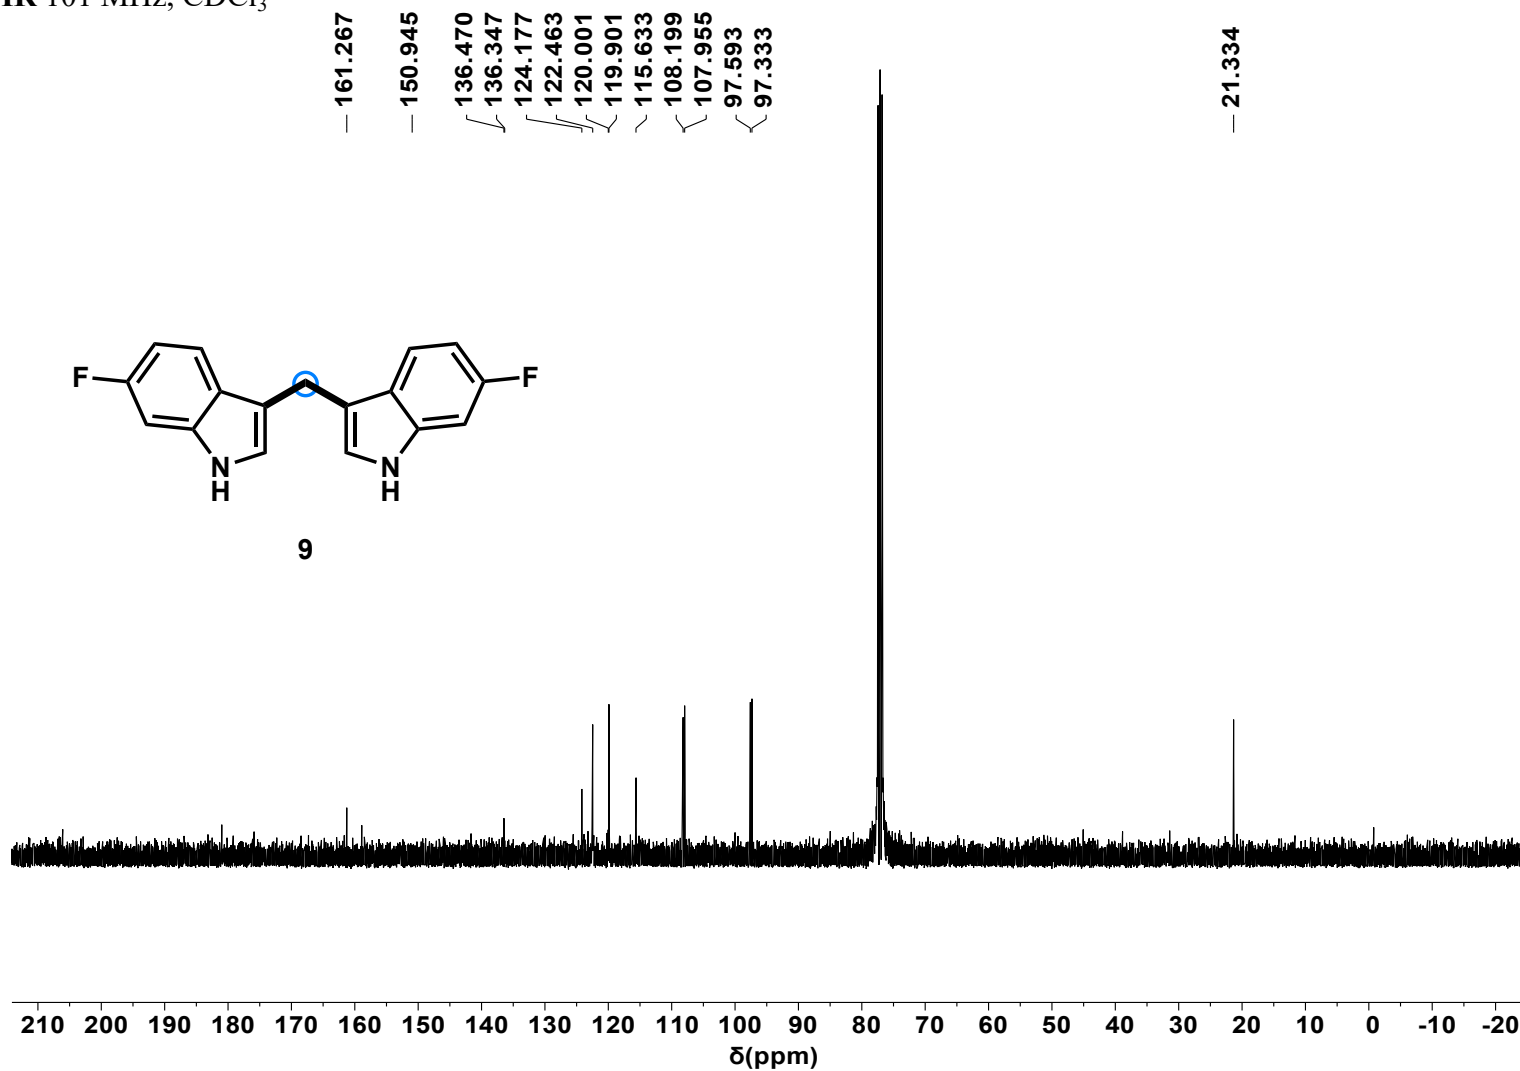

$^{19}\text{F}$  NMR 376 MHz,  $\text{CDCl}_3$

-121.219  
-121.234  
-121.246  
-121.262  
-121.289

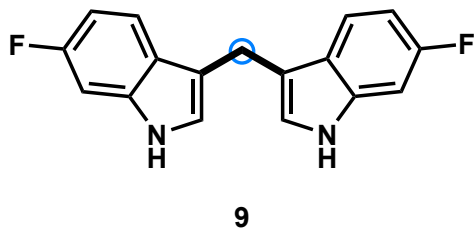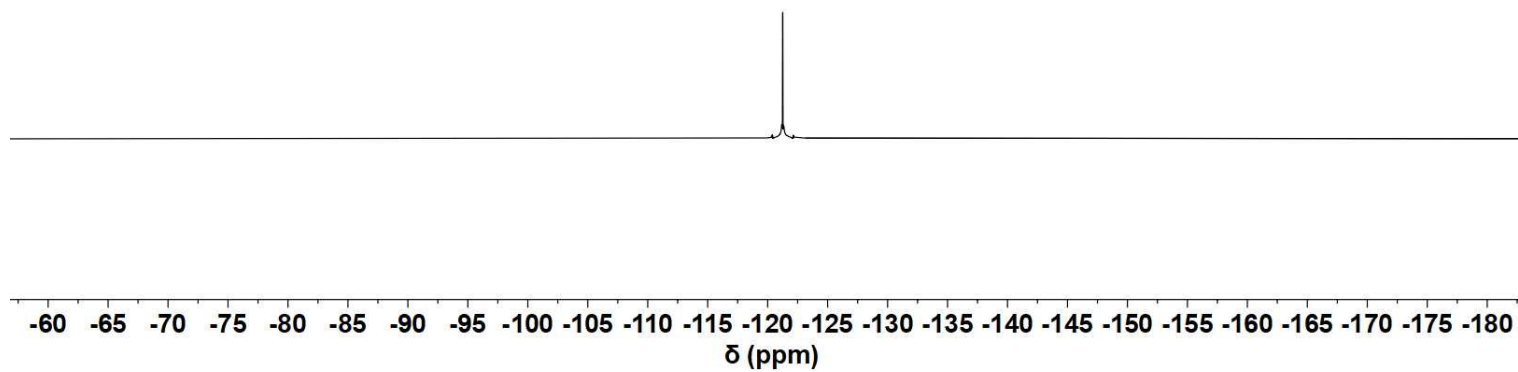

$^1\text{H}$  NMR 400 MHz,  $\text{CDCl}_3$

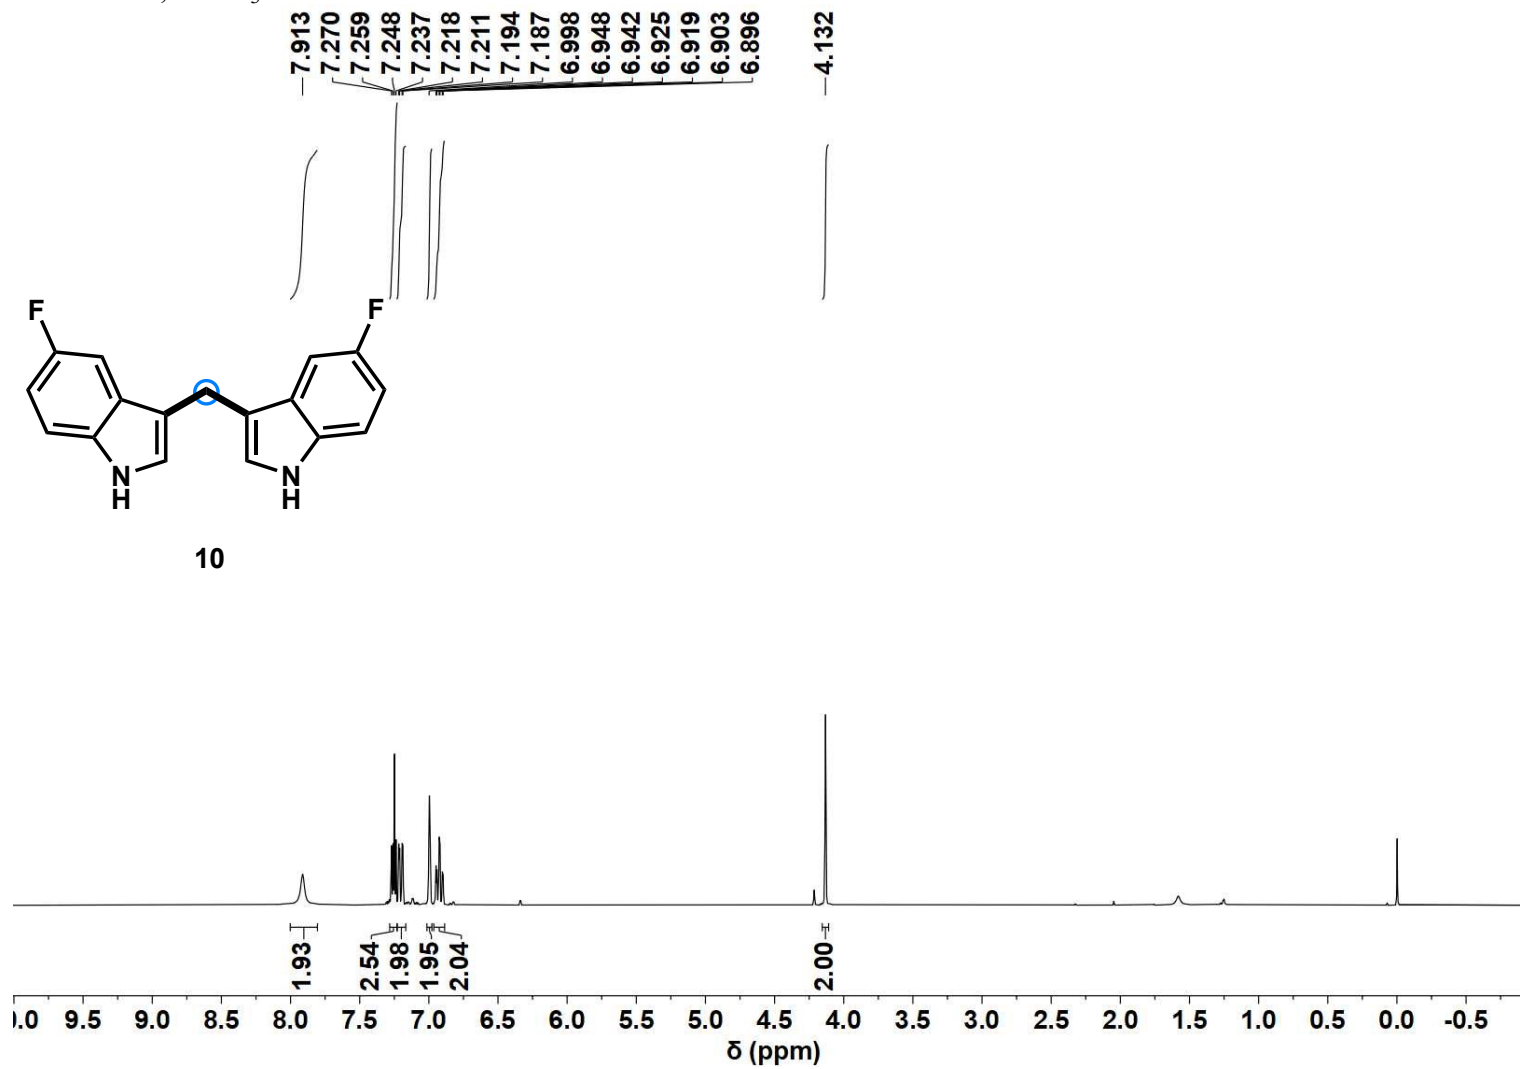

$^{13}\text{C}$  NMR 101 MHz,  $\text{CDCl}_3$

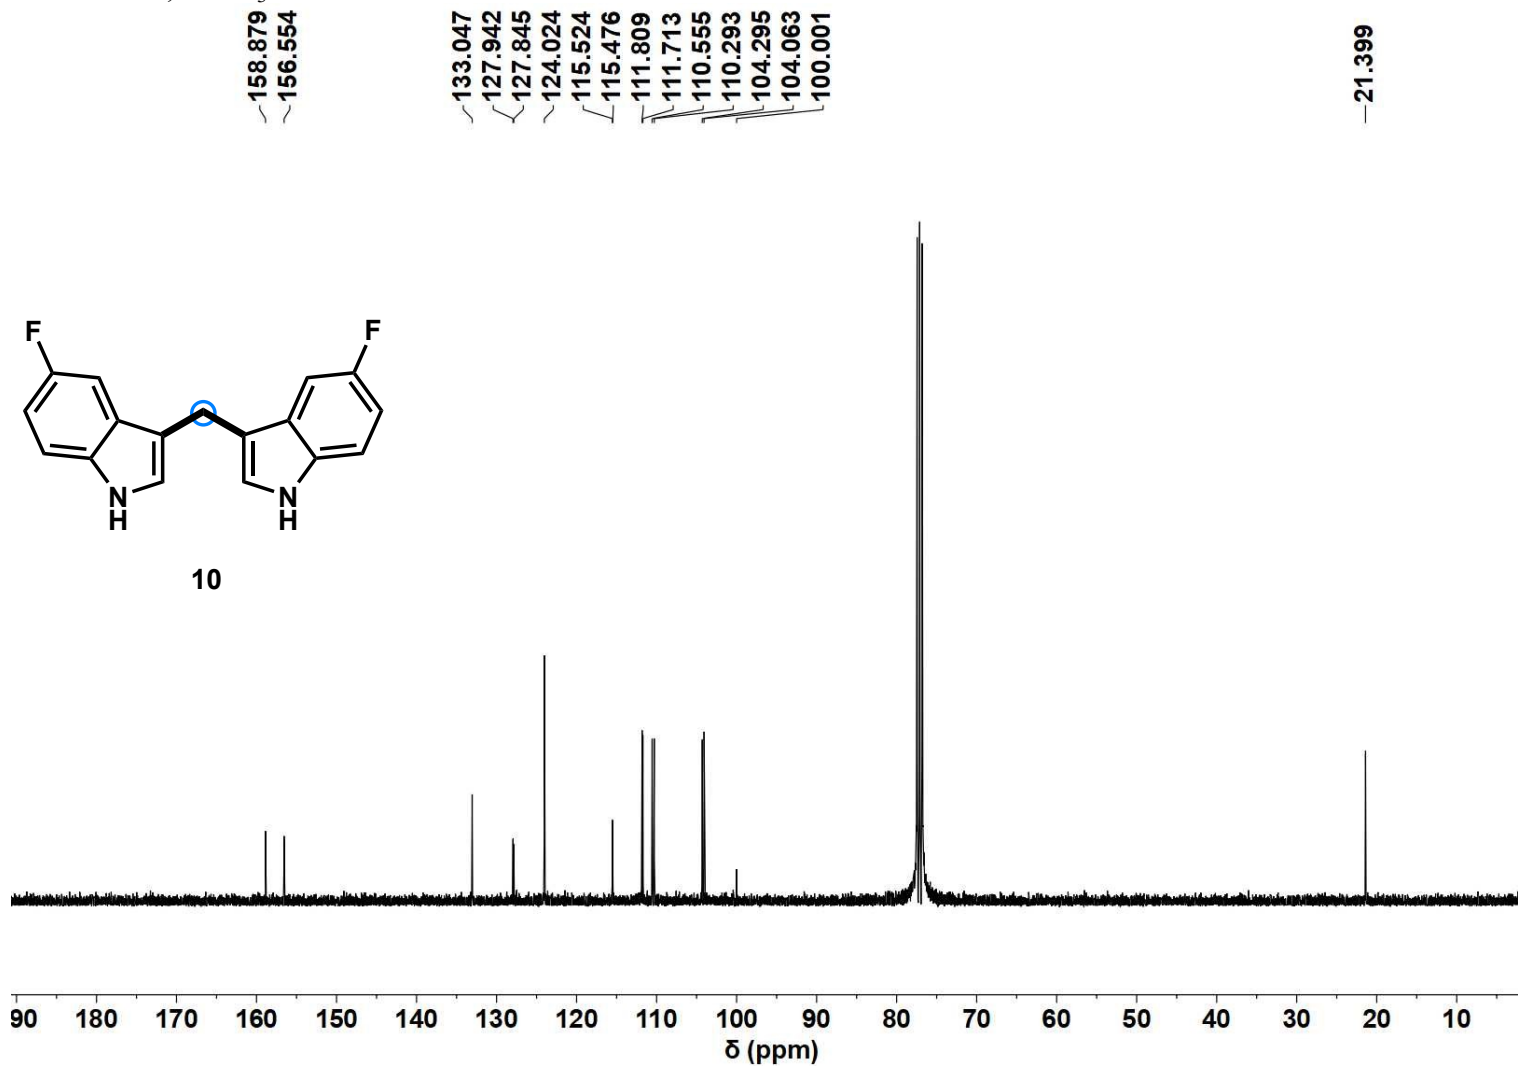



$^{19}\text{F}$  NMR 376 MHz,  $\text{CDCl}_3$

---124.697

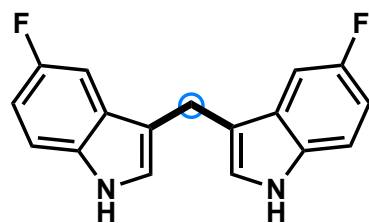

10

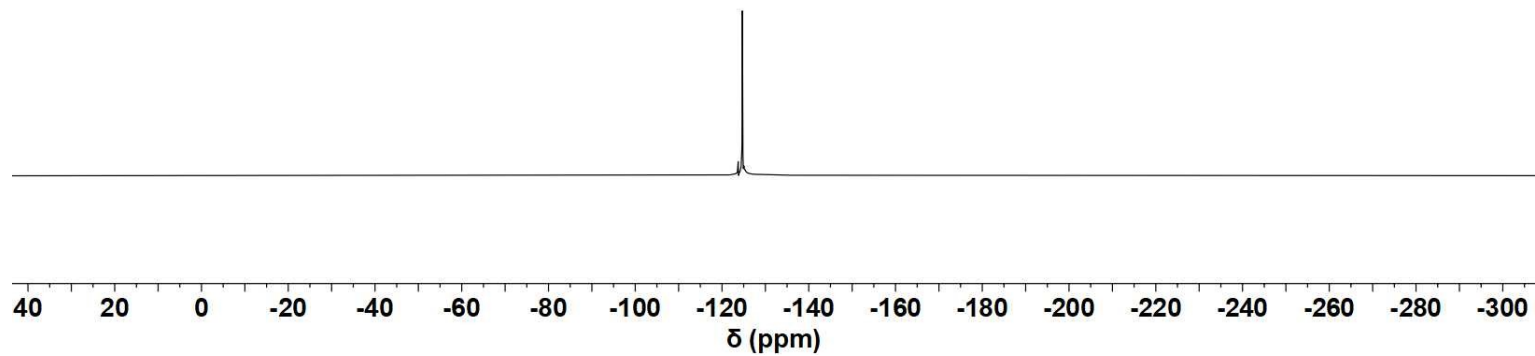

S81

$^1\text{H}$  NMR 400 MHz,  $\text{CDCl}_3$

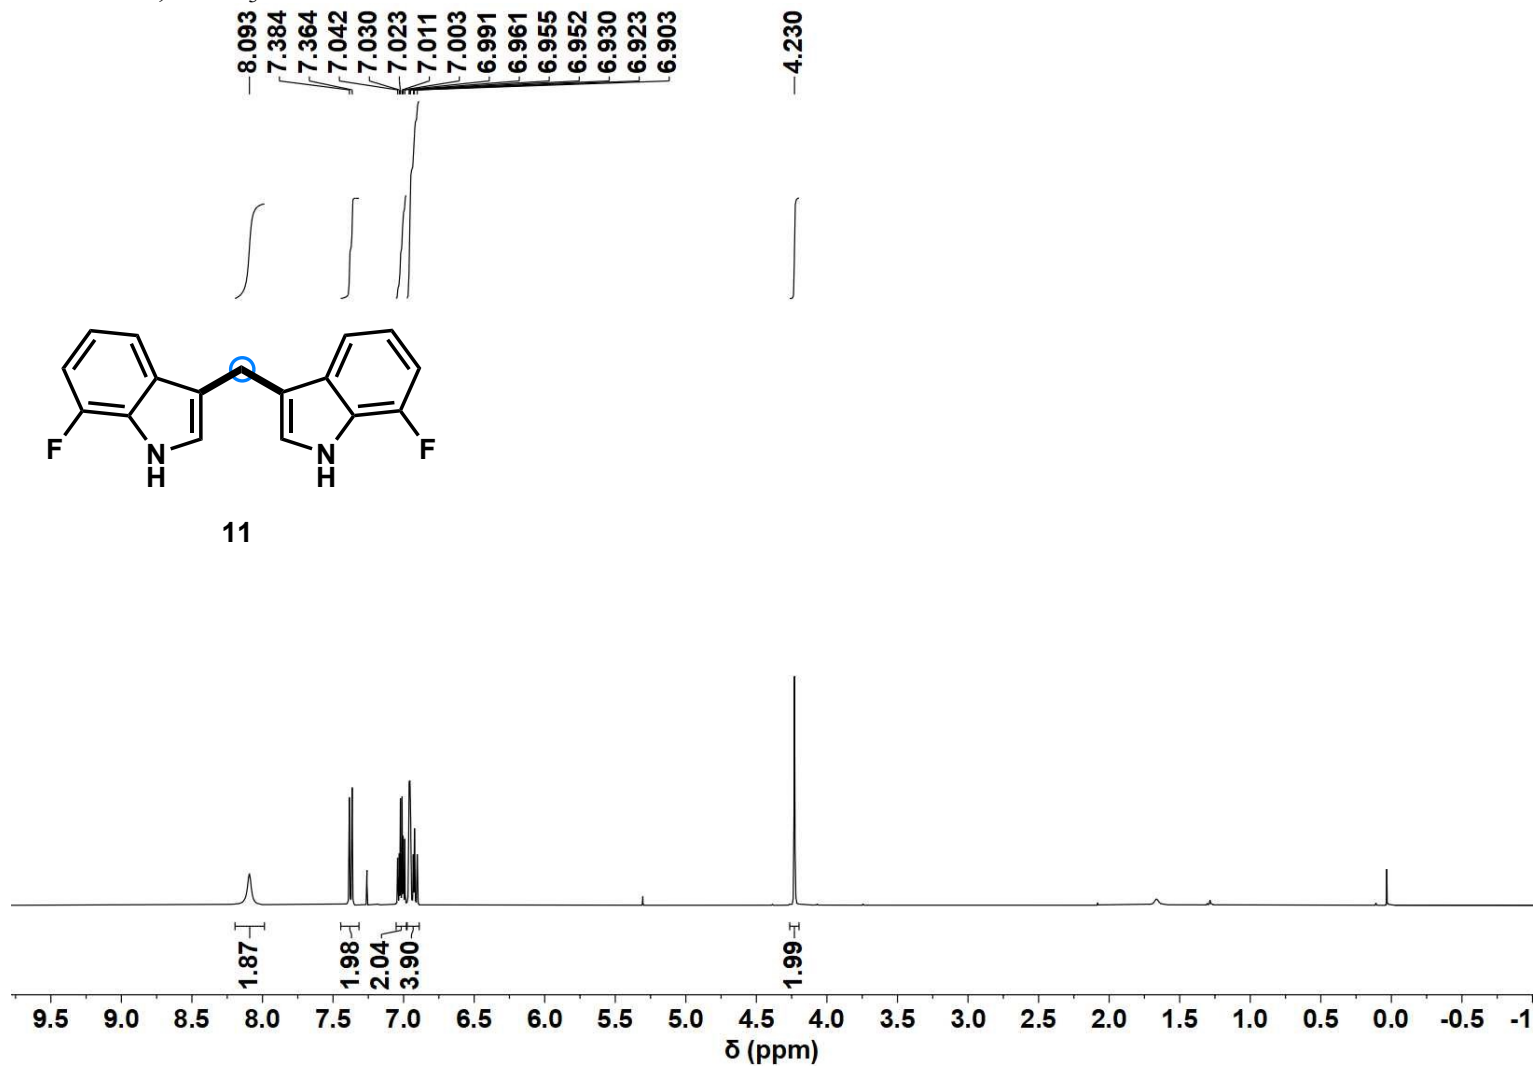

$^{13}\text{C}$  NMR 101 MHz,  $\text{CDCl}_3$

$^{19}\text{F}$  NMR 376 MHz,

150.908  
148.484  
131.328  
131.269  
124.896  
124.763  
123.027  
123.013  
119.673  
119.611  
116.324  
116.300  
115.084  
115.050  
107.033  
106.875

21.447  
21.426  
21.412

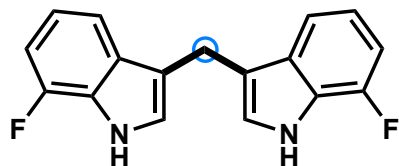

11

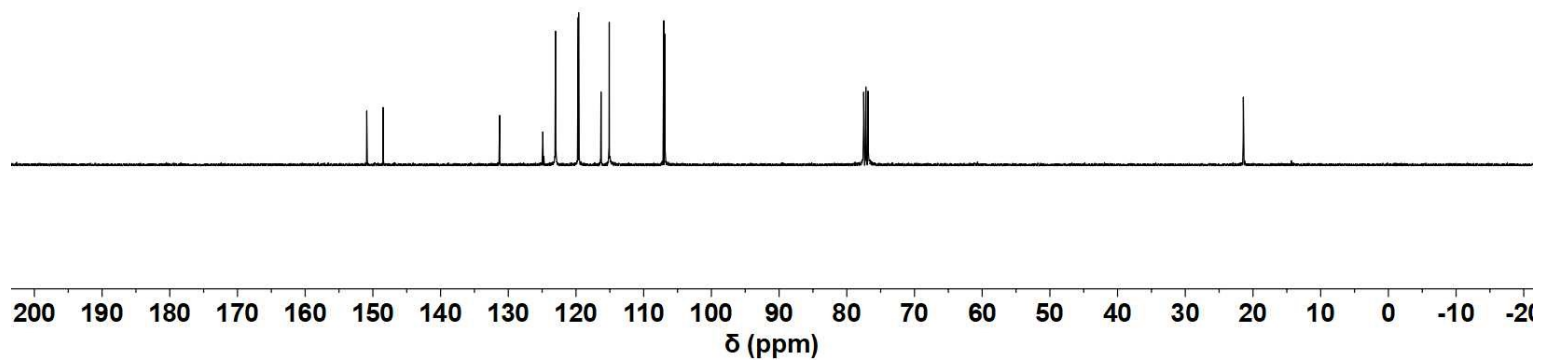

$^{19}\text{F}$  NMR 376 MHz,  $\text{CDCl}_3$

-135.268  
-135.282  
-135.299  
-135.312

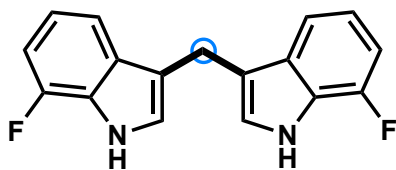

11

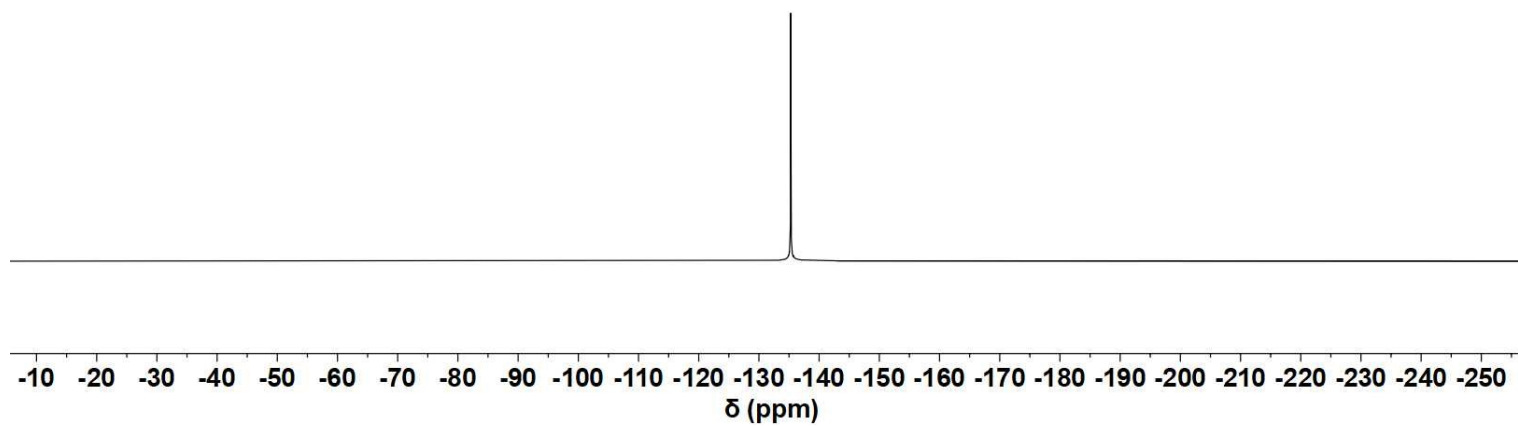

S84

$^1\text{H}$  NMR 400 MHz,  $\text{CDCl}_3$

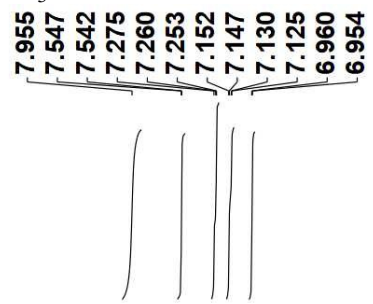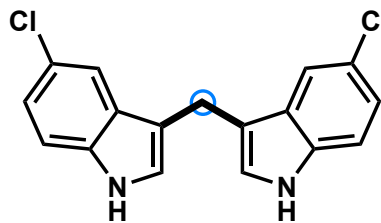

12

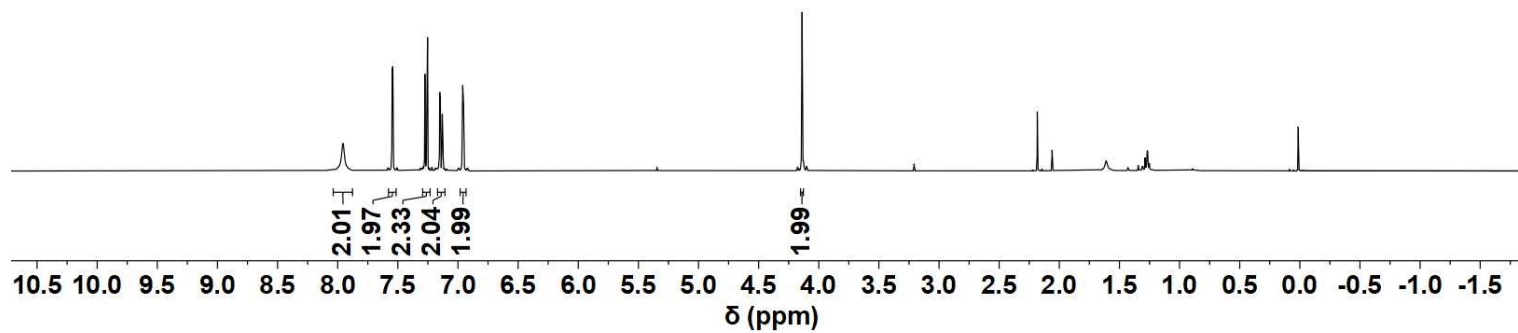

$^{13}\text{C}$  NMR 101 MHz,  $\text{CDCl}_3$

134.908  
128.603  
125.065  
123.693  
122.379  
118.735  
115.041  
112.244

21.205

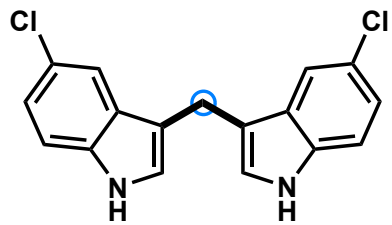

12

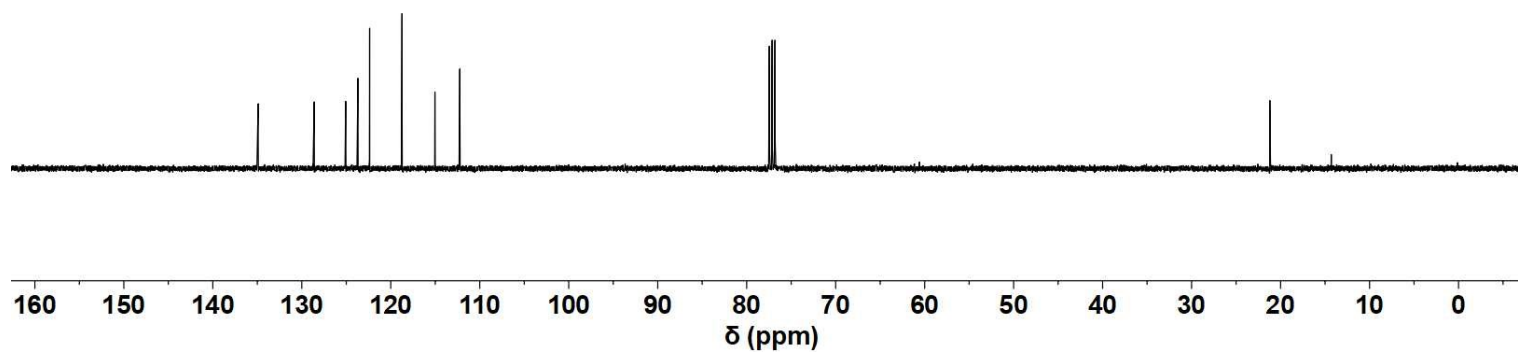

$^1\text{H NMR}$  400 MHz,  $\text{CDCl}_3$

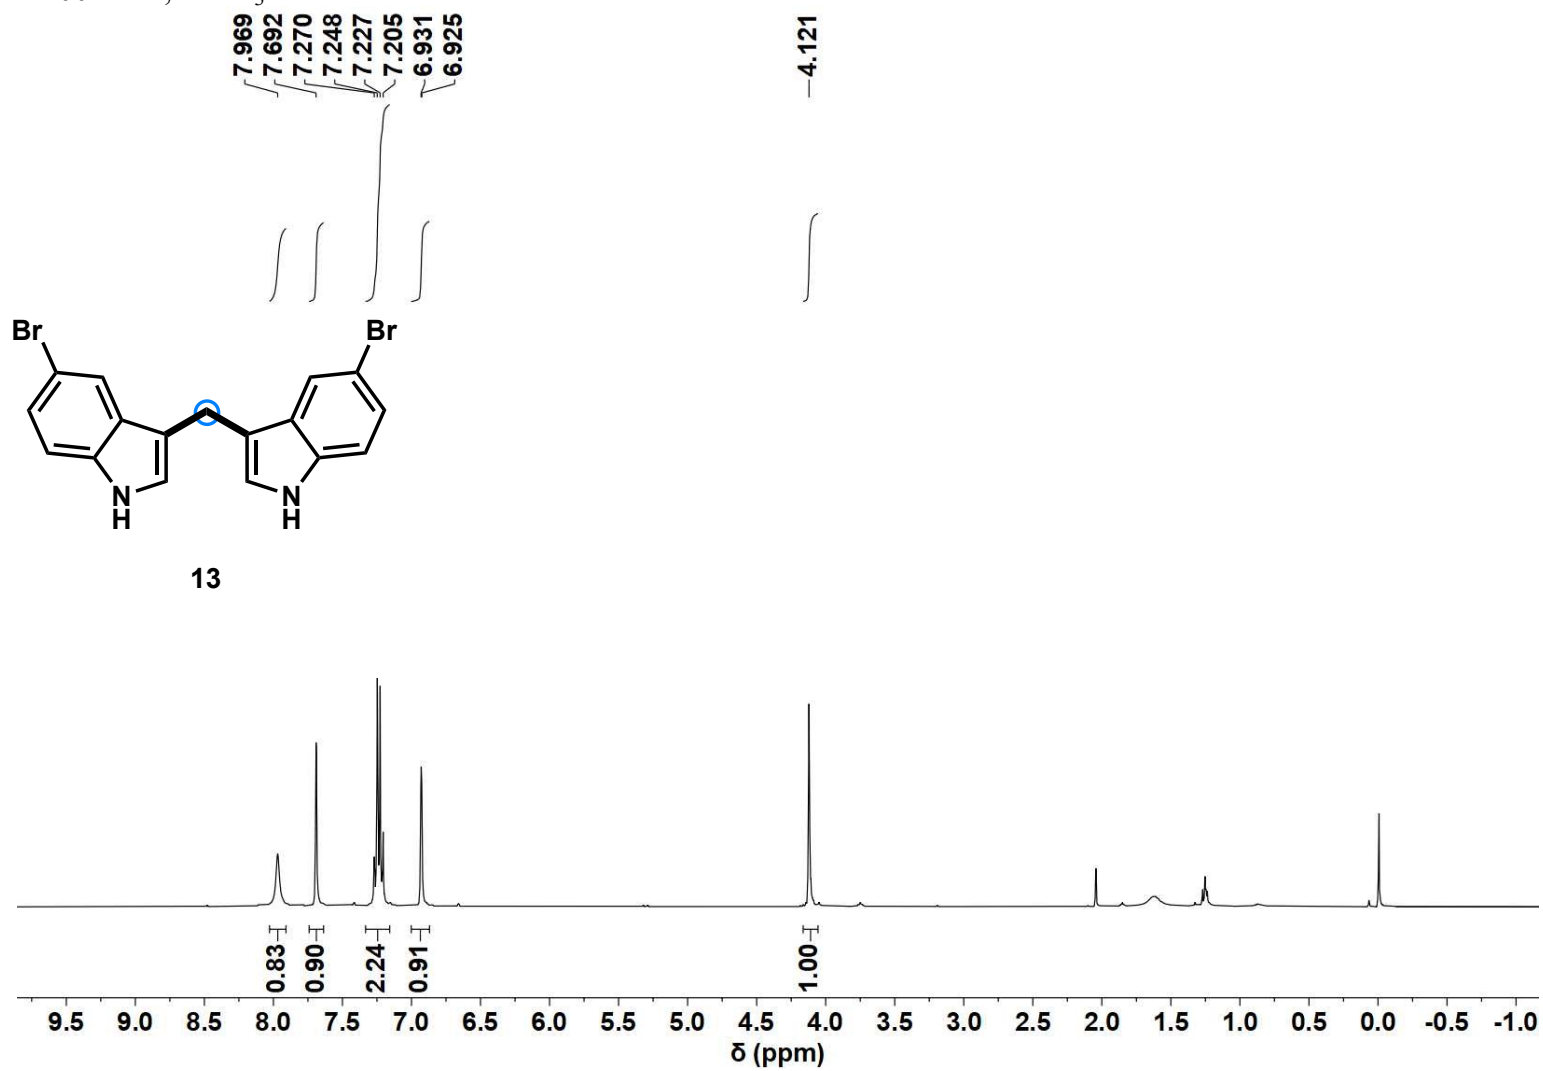

$^{13}\text{C}$  NMR 101 MHz,  $\text{CDCl}_3$

135.160  
129.253  
124.933  
123.512  
121.833  
114.940  
112.681  
112.641

21.187

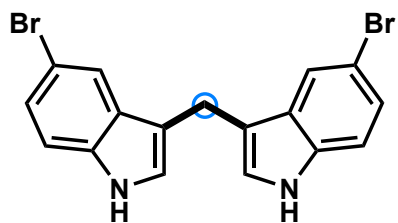

13

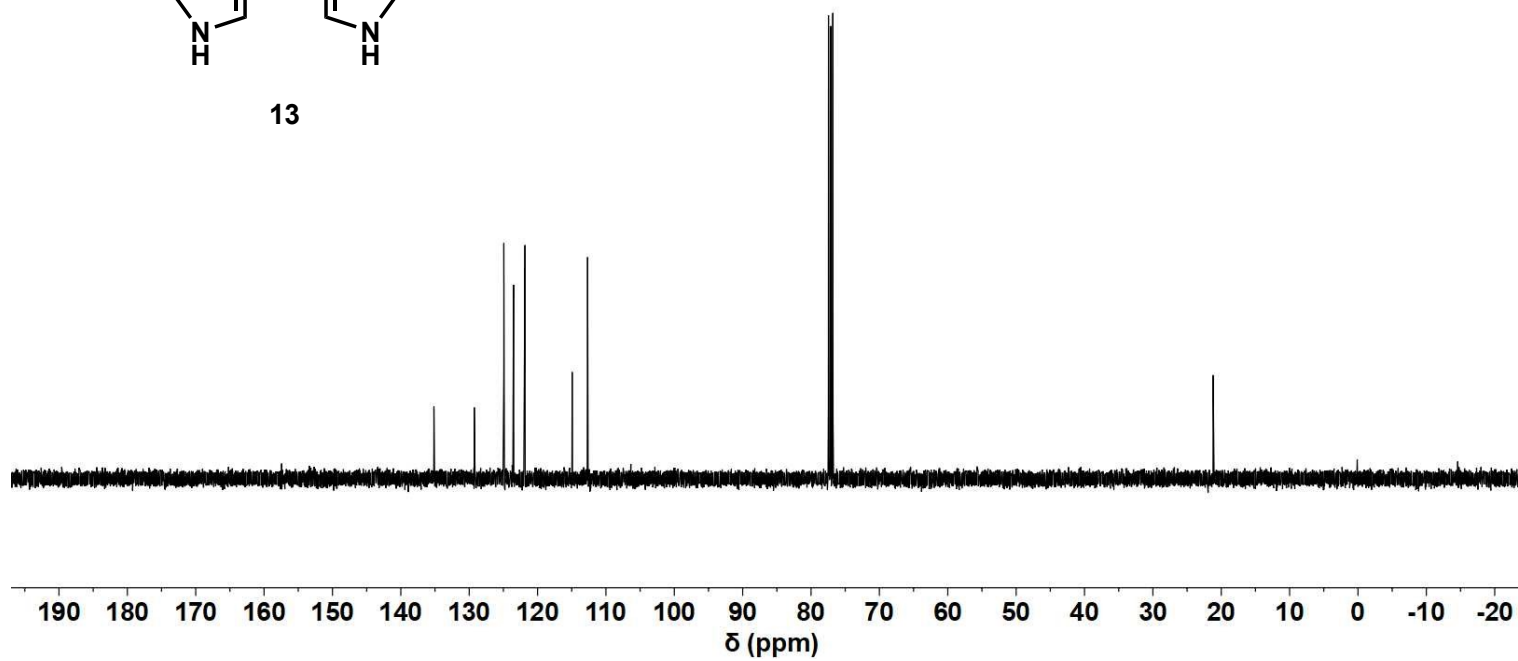



$^1\text{H}$  NMR 400 MHz,  $\text{DMSO-}d_6$

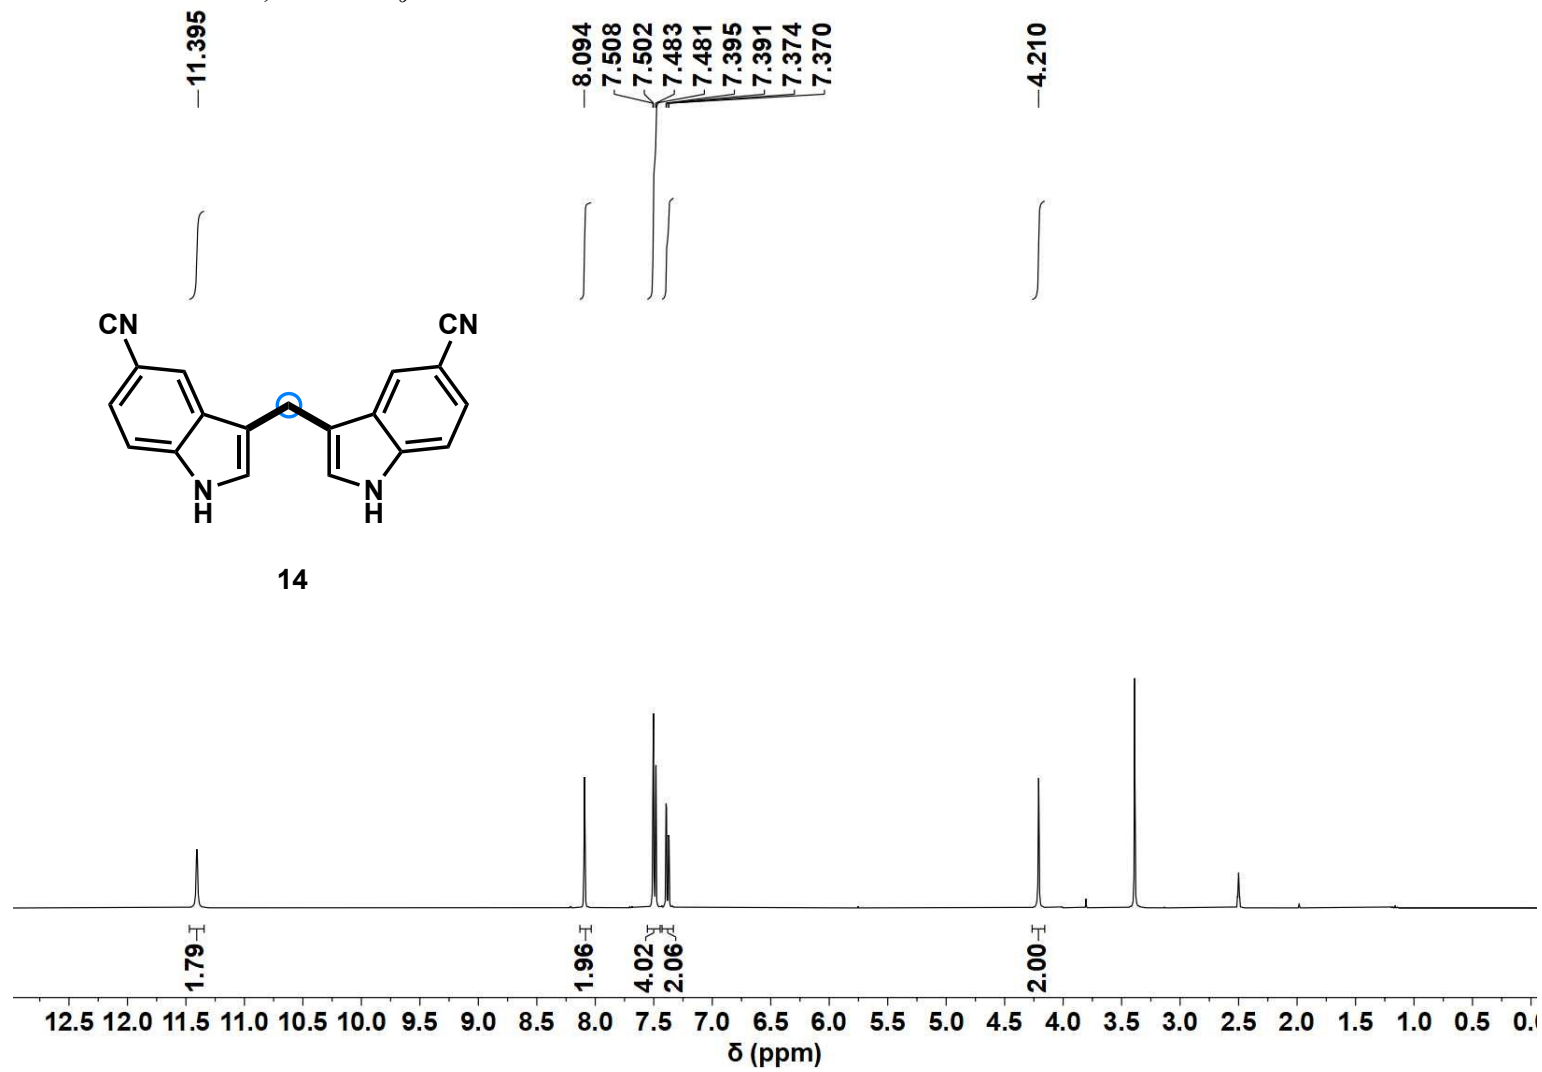

<sup>13</sup>C NMR 101 MHz, DMSO-*d*<sub>6</sub>

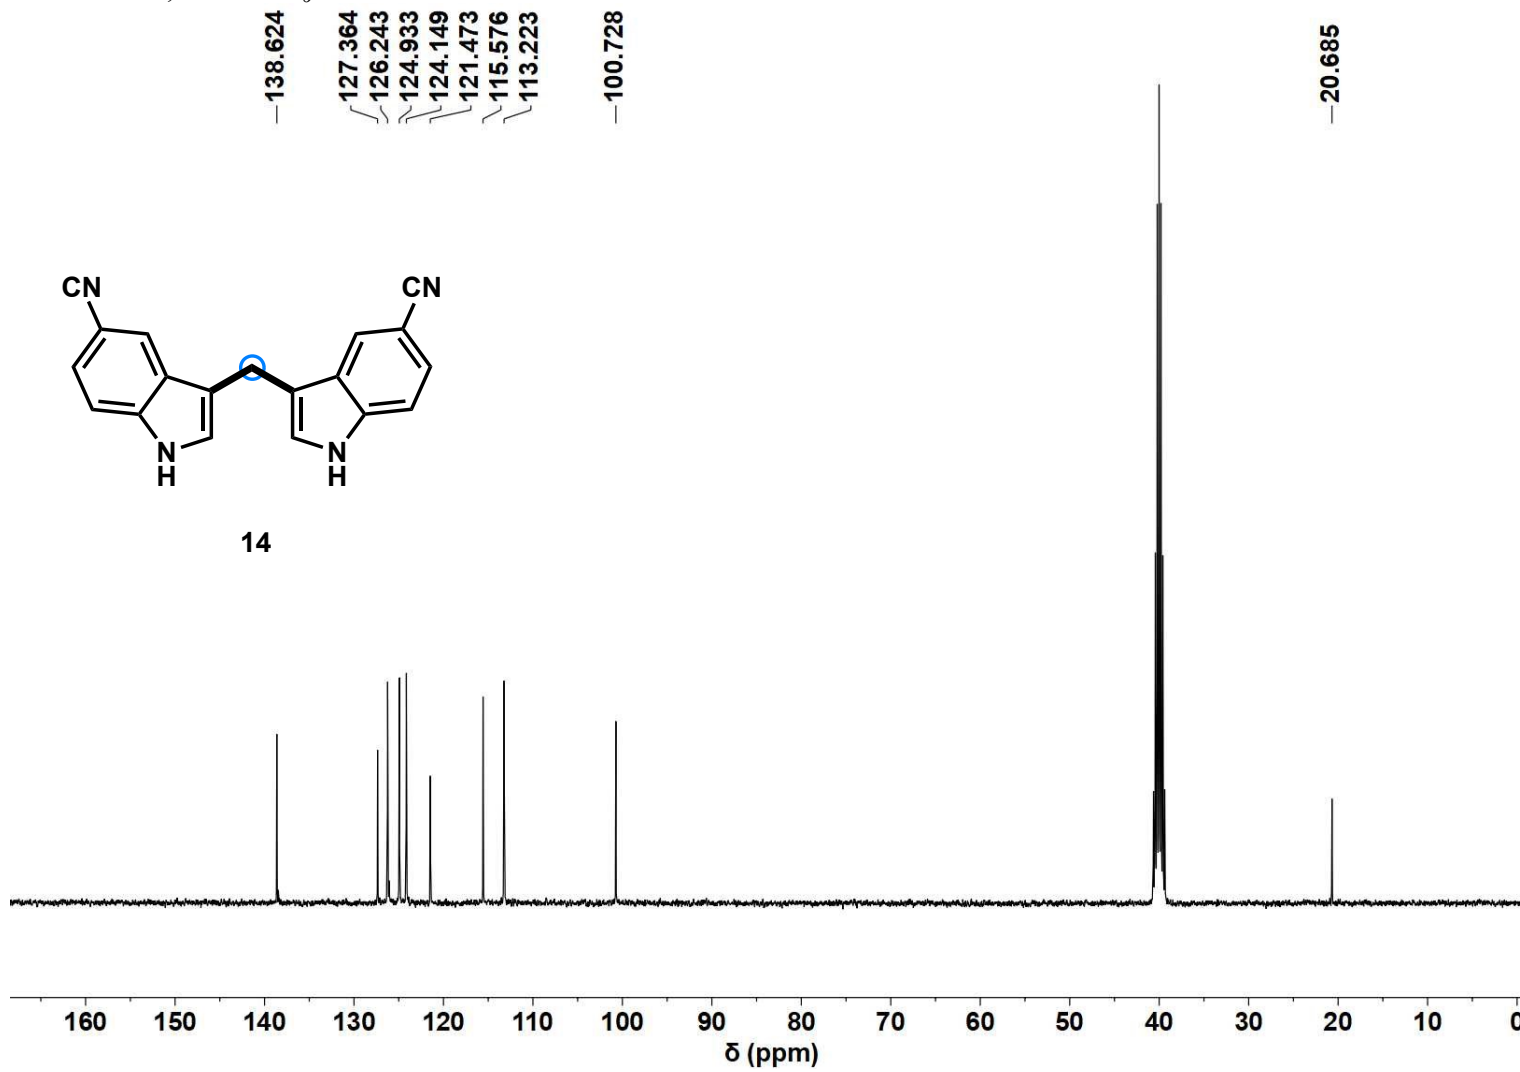

$^1\text{H}$  NMR 400 MHz,  $\text{DMSO-}d_6$

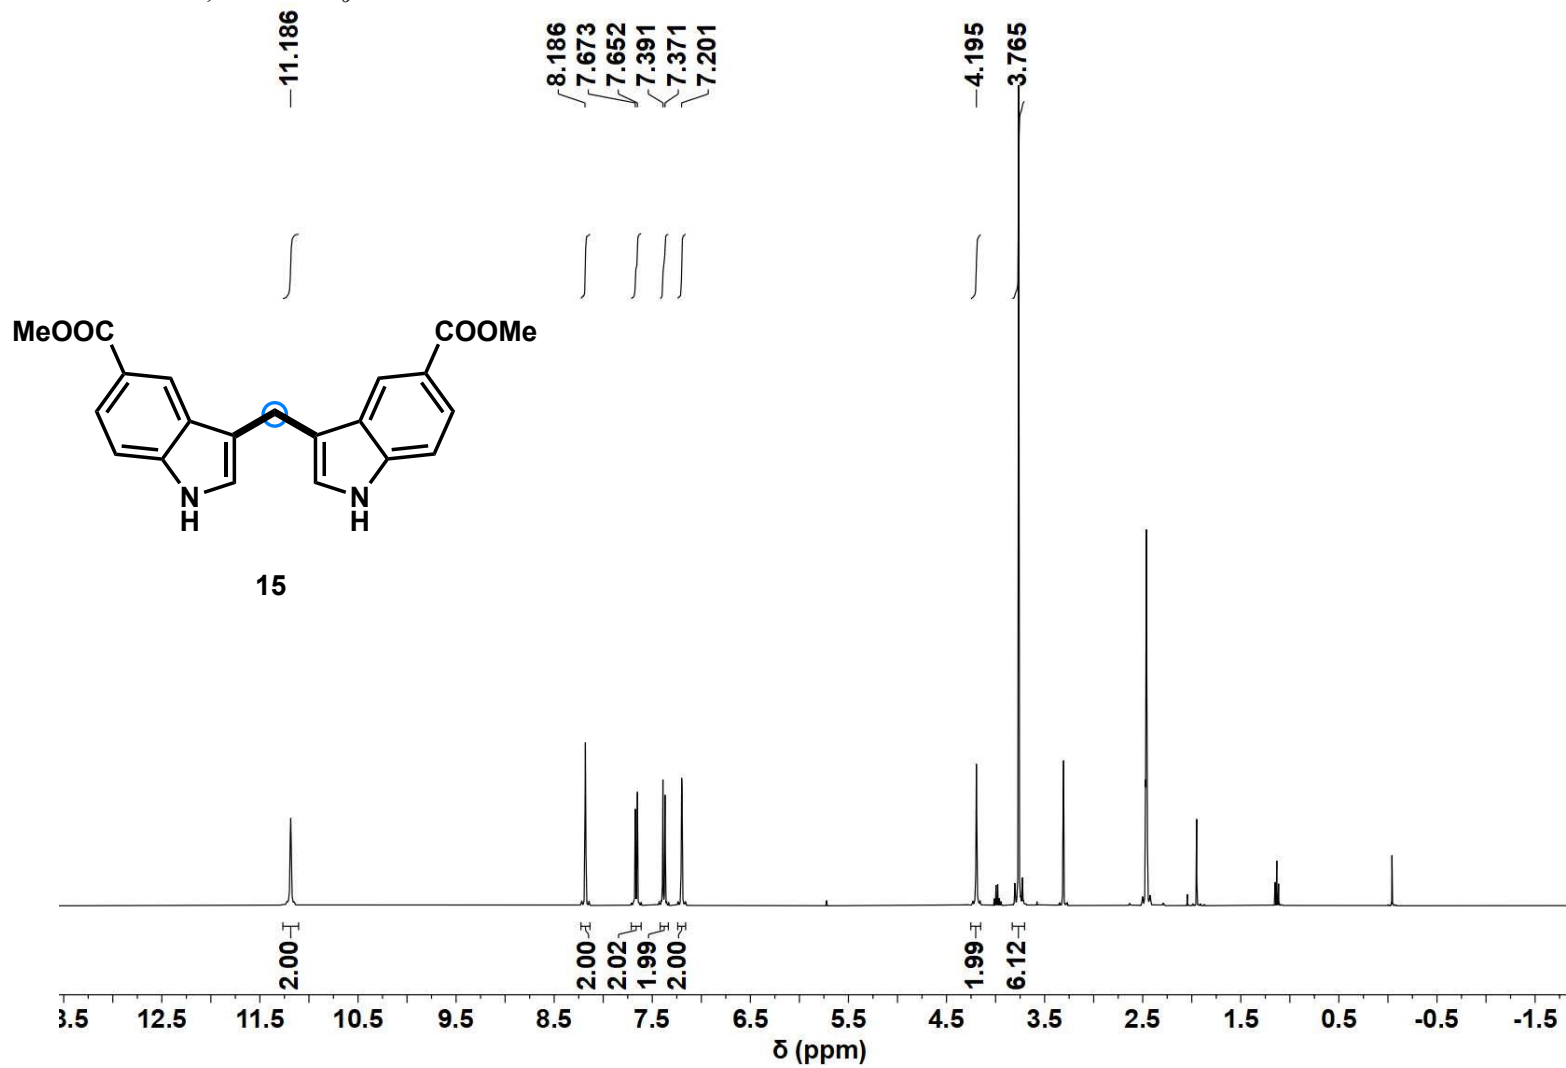

$^{13}\text{C}$  NMR 101 MHz,  $\text{DMSO-}d_6$

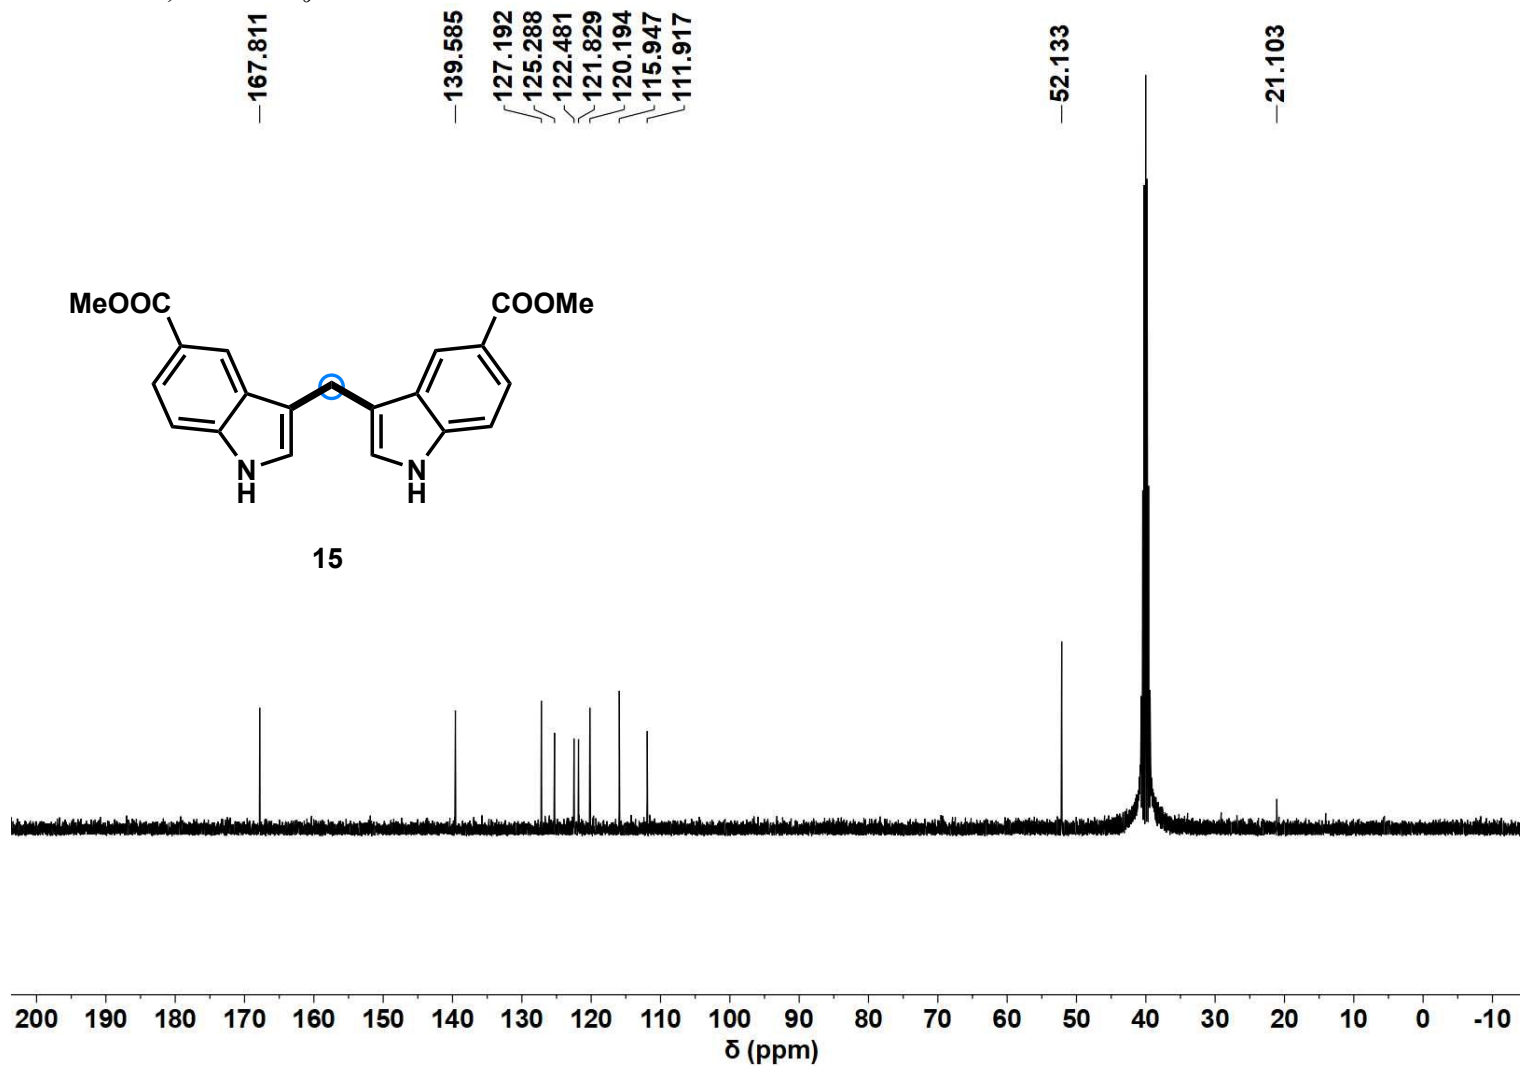

$^1\text{H}$  NMR 400 MHz,  $\text{CDCl}_3$

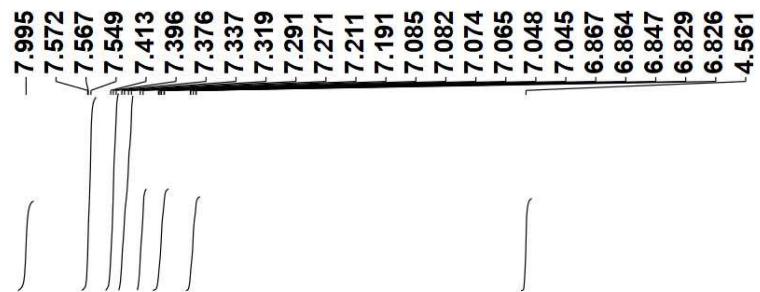

1.556

-0.000

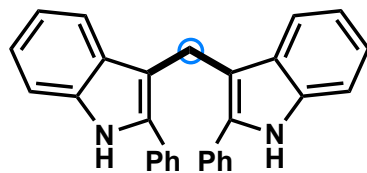

16

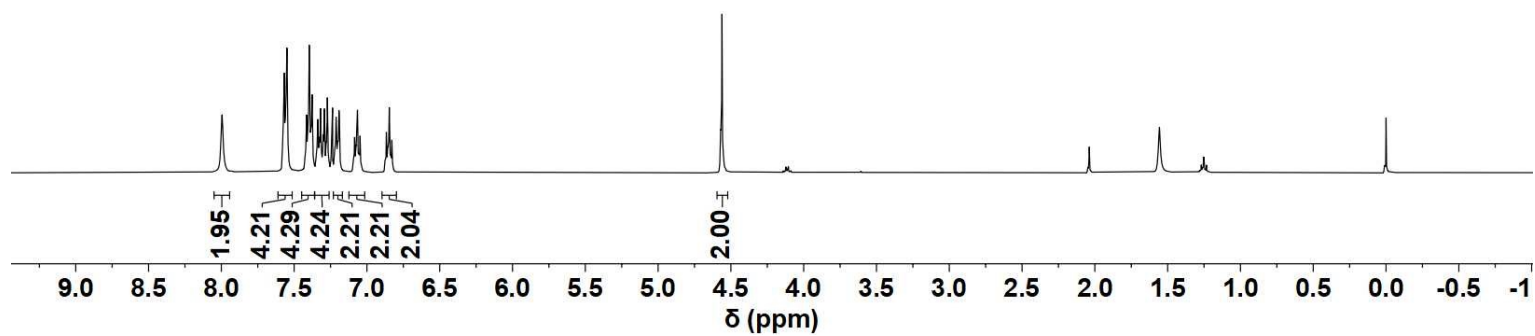

<sup>13</sup>C NMR 101 MHz, CDCl<sub>3</sub>

135.979  
134.585  
133.399  
129.437  
128.799  
128.429  
127.614  
122.049  
120.114  
119.520  
112.127  
110.608

21.401

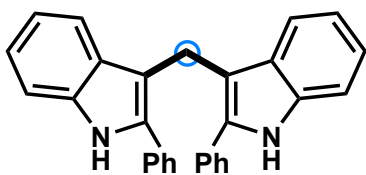

16

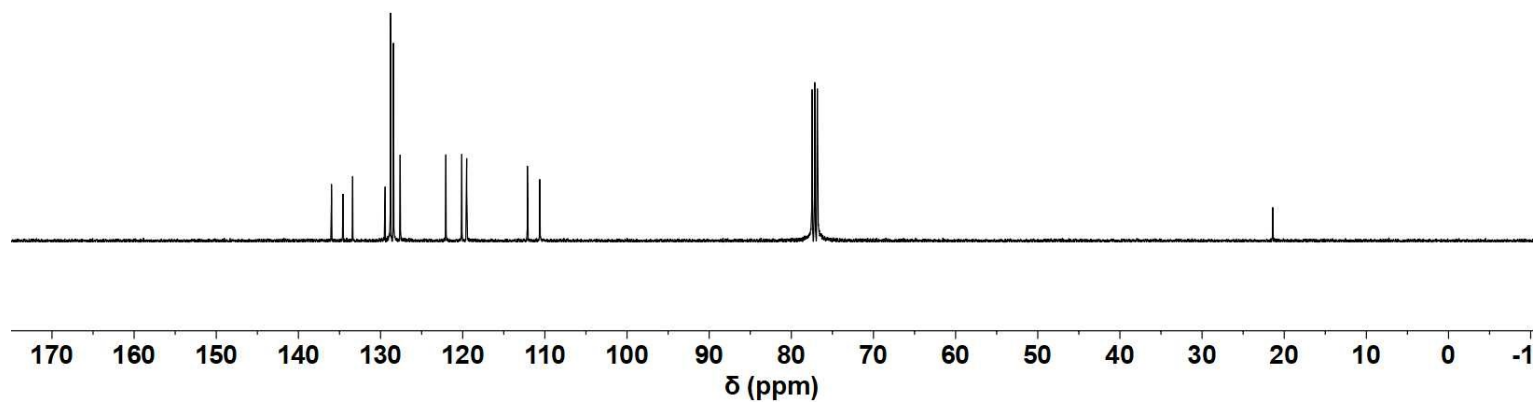

<sup>1</sup>H NMR 400 MHz, CDCl<sub>3</sub>

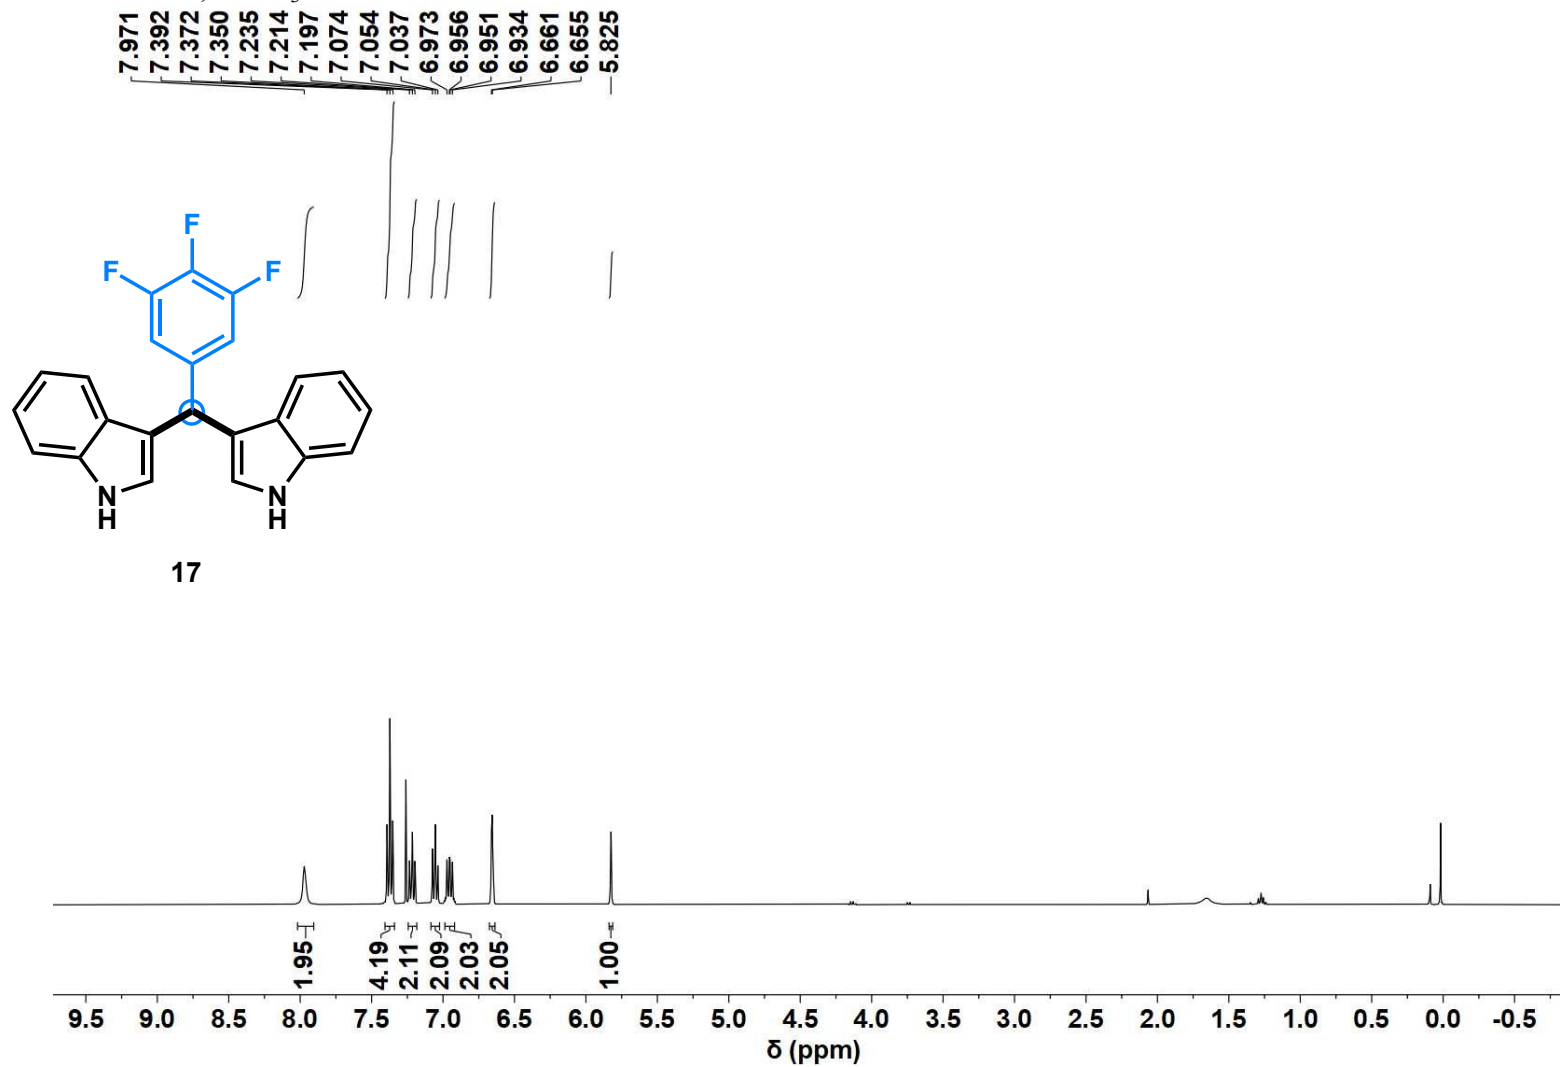

$^{13}\text{C}$  NMR 101 MHz,  $\text{CDCl}_3$

152.471  
152.364  
150.001  
149.890  
140.687  
136.803  
126.734  
123.737  
122.452  
119.716  
118.258  
112.740  
112.687  
112.582  
112.529  
111.457  
40.861

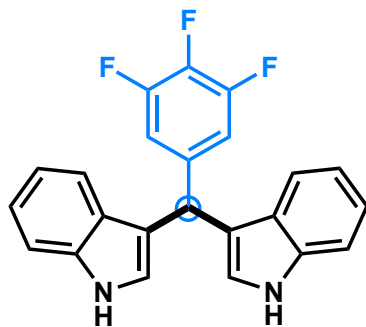

17

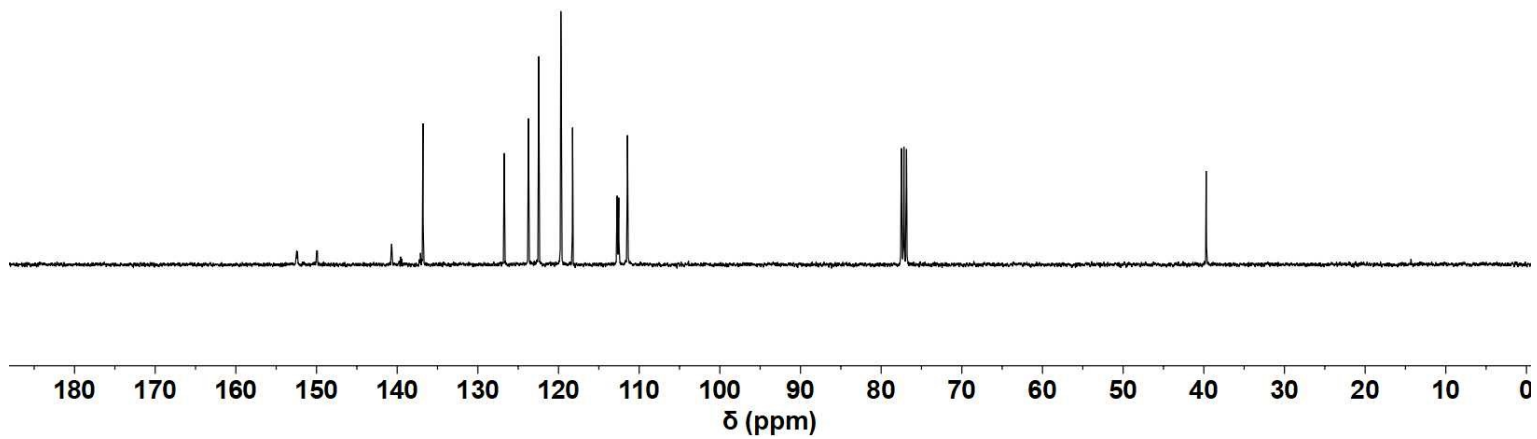



$^{19}\text{F}$  NMR 376 MHz,  $\text{CDCl}_3$

-134.724  
-134.808

-163.531  
-163.600  
-163.674

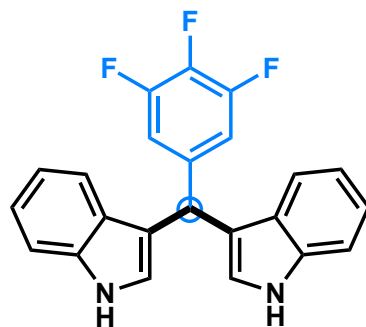

17

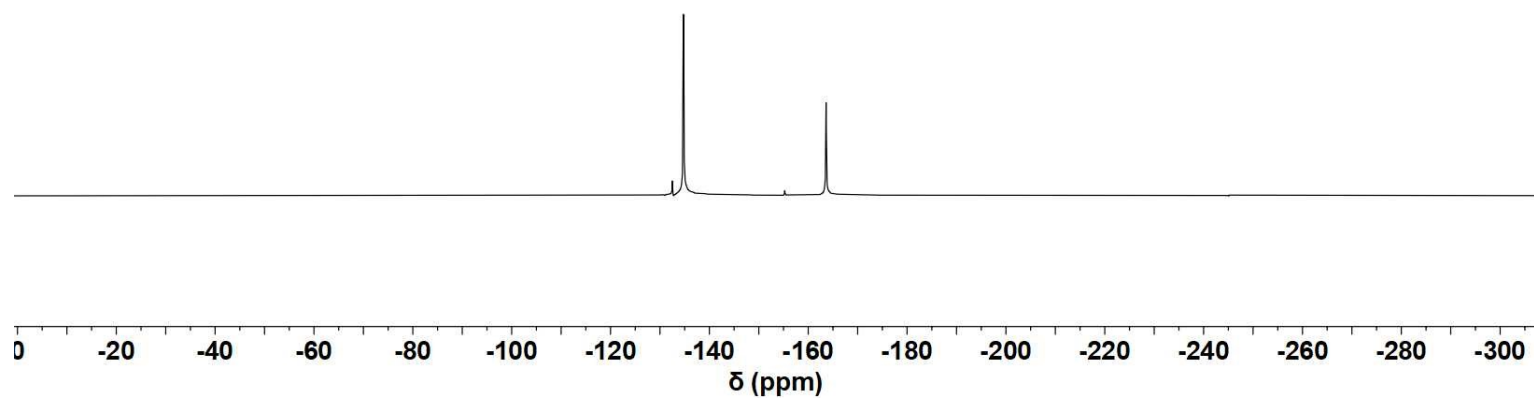

$^1\text{H}$  NMR 400 MHz,  $\text{CDCl}_3$

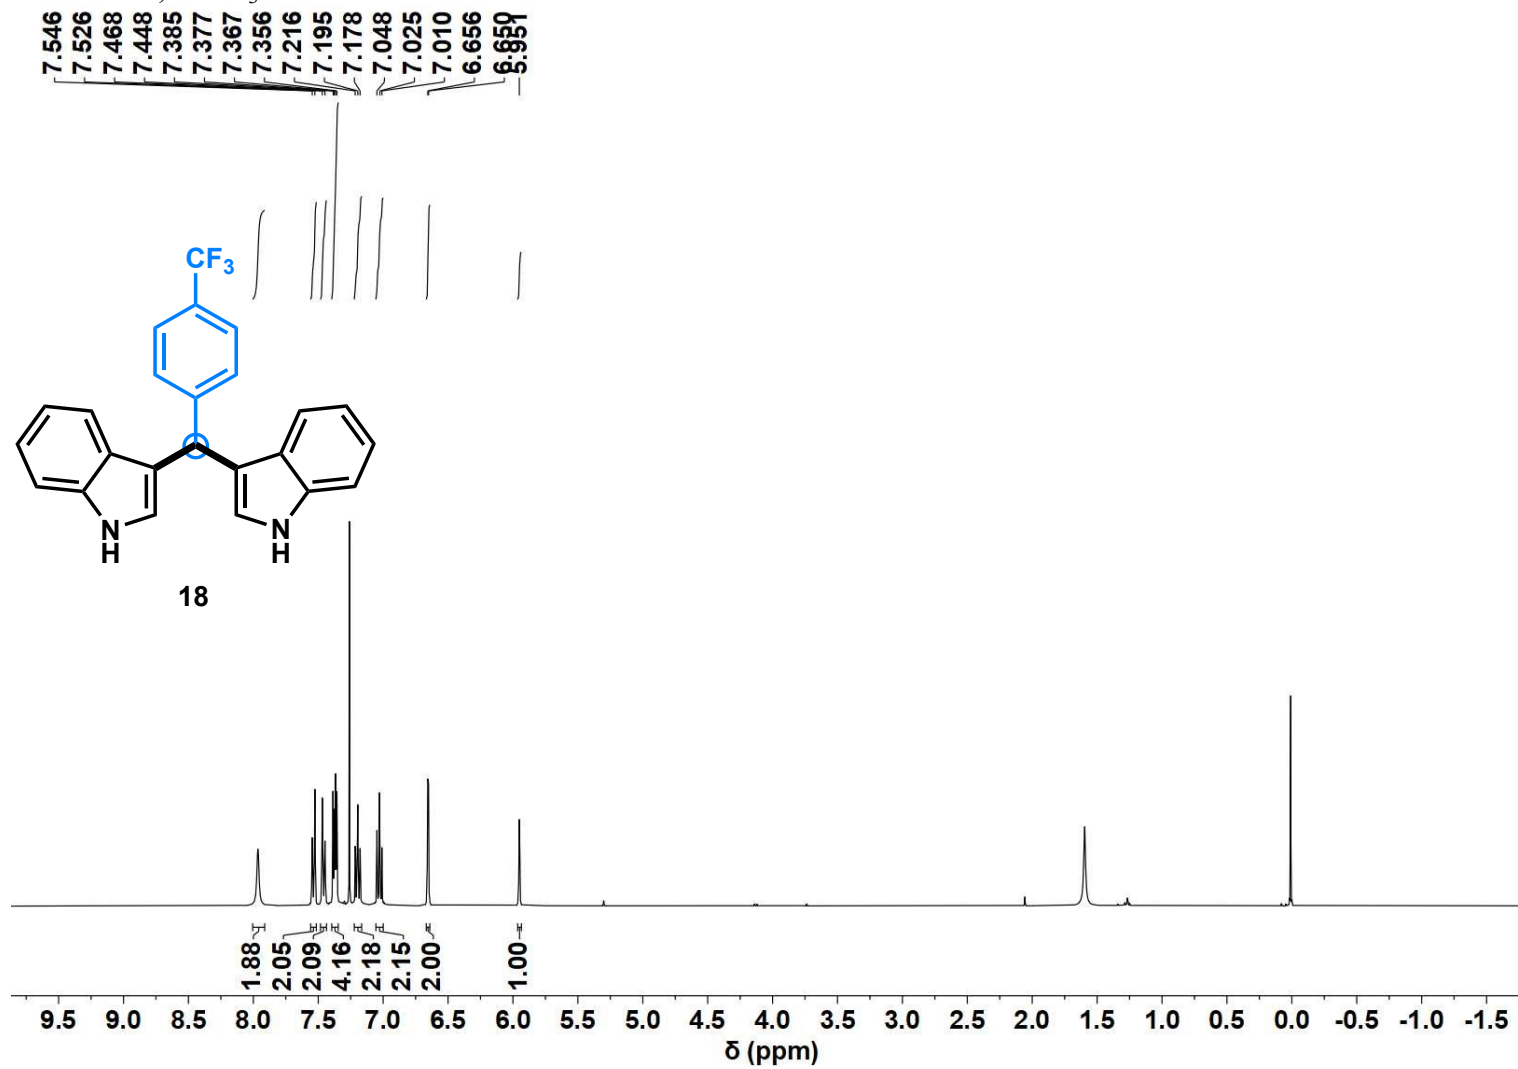

$^{13}\text{C}$  NMR 101 MHz,  $\text{CDCl}_3$

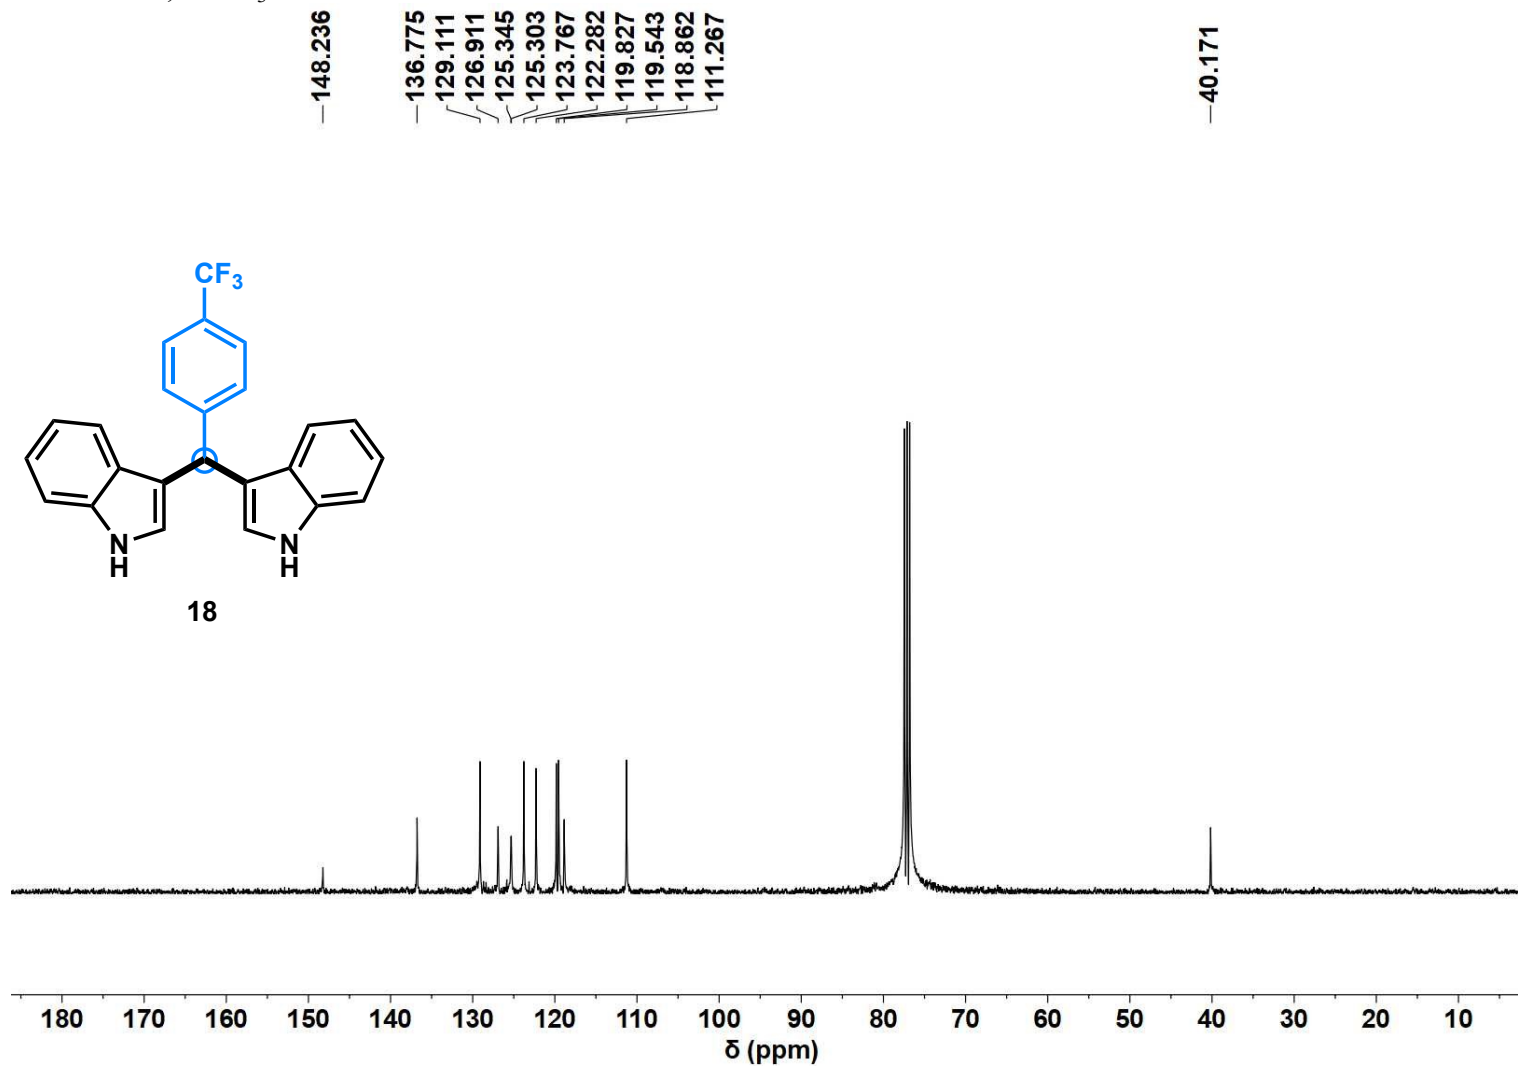

$^{19}\text{F}$  NMR 376 MHz,  $\text{CDCl}_3$

---62.054

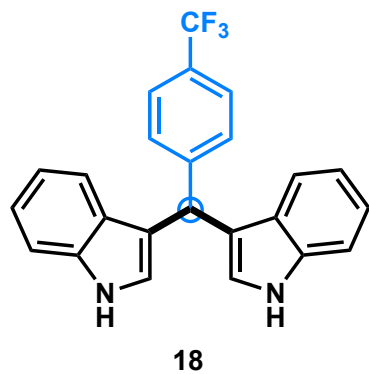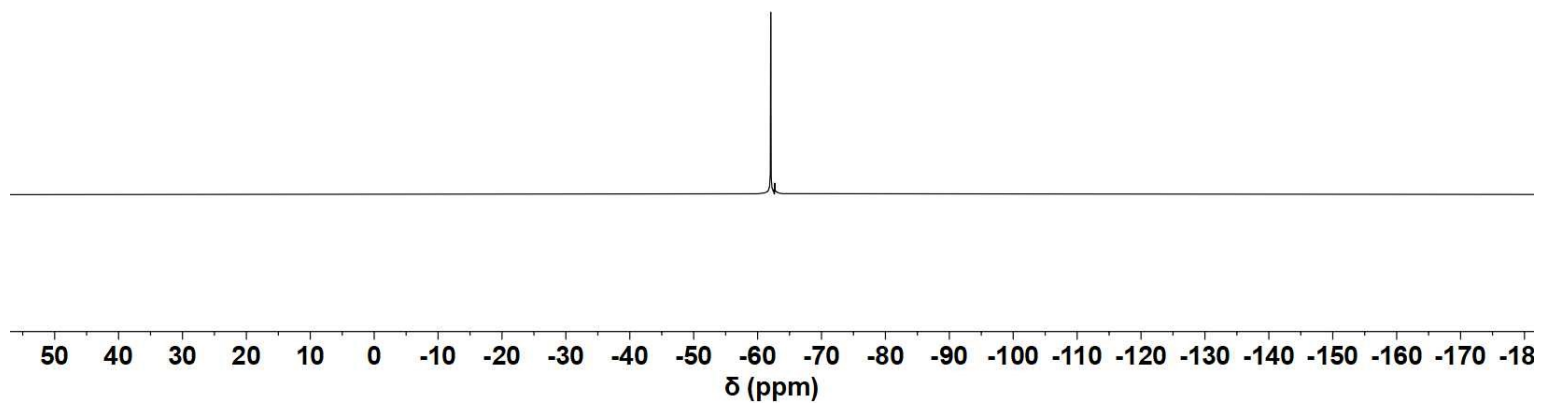

S100

$^1\text{H}$  NMR 400 MHz,  $\text{CDCl}_3$

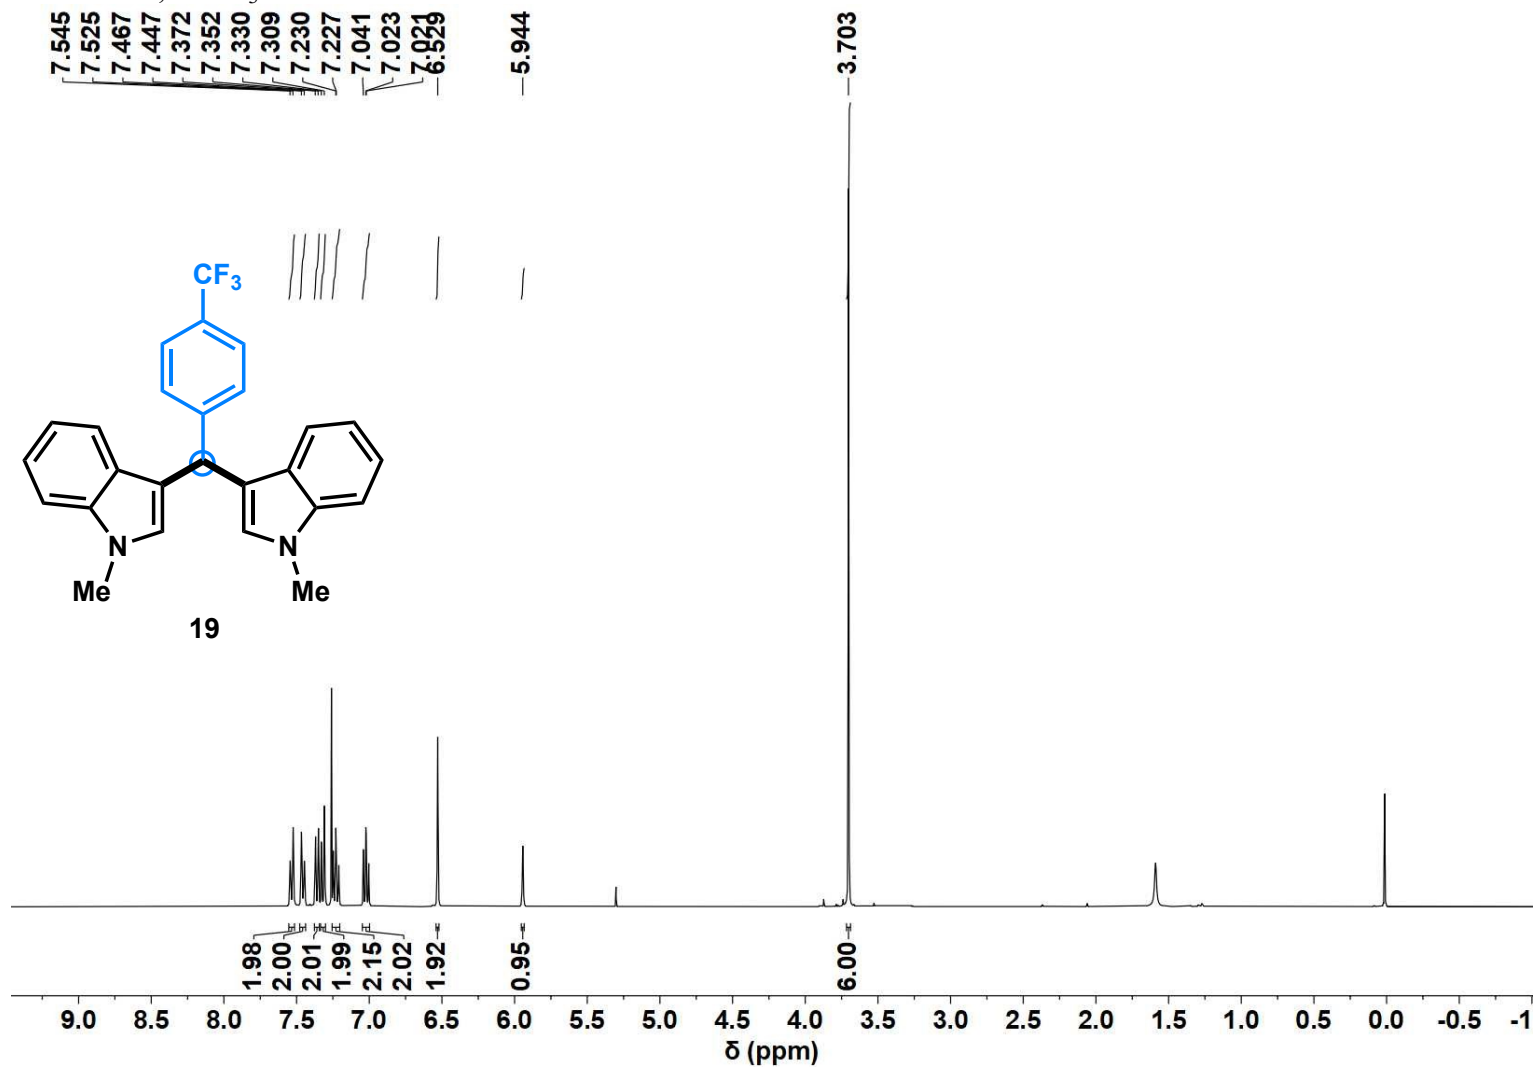

<sup>13</sup>C NMR 101 MHz, CDCl<sub>3</sub>

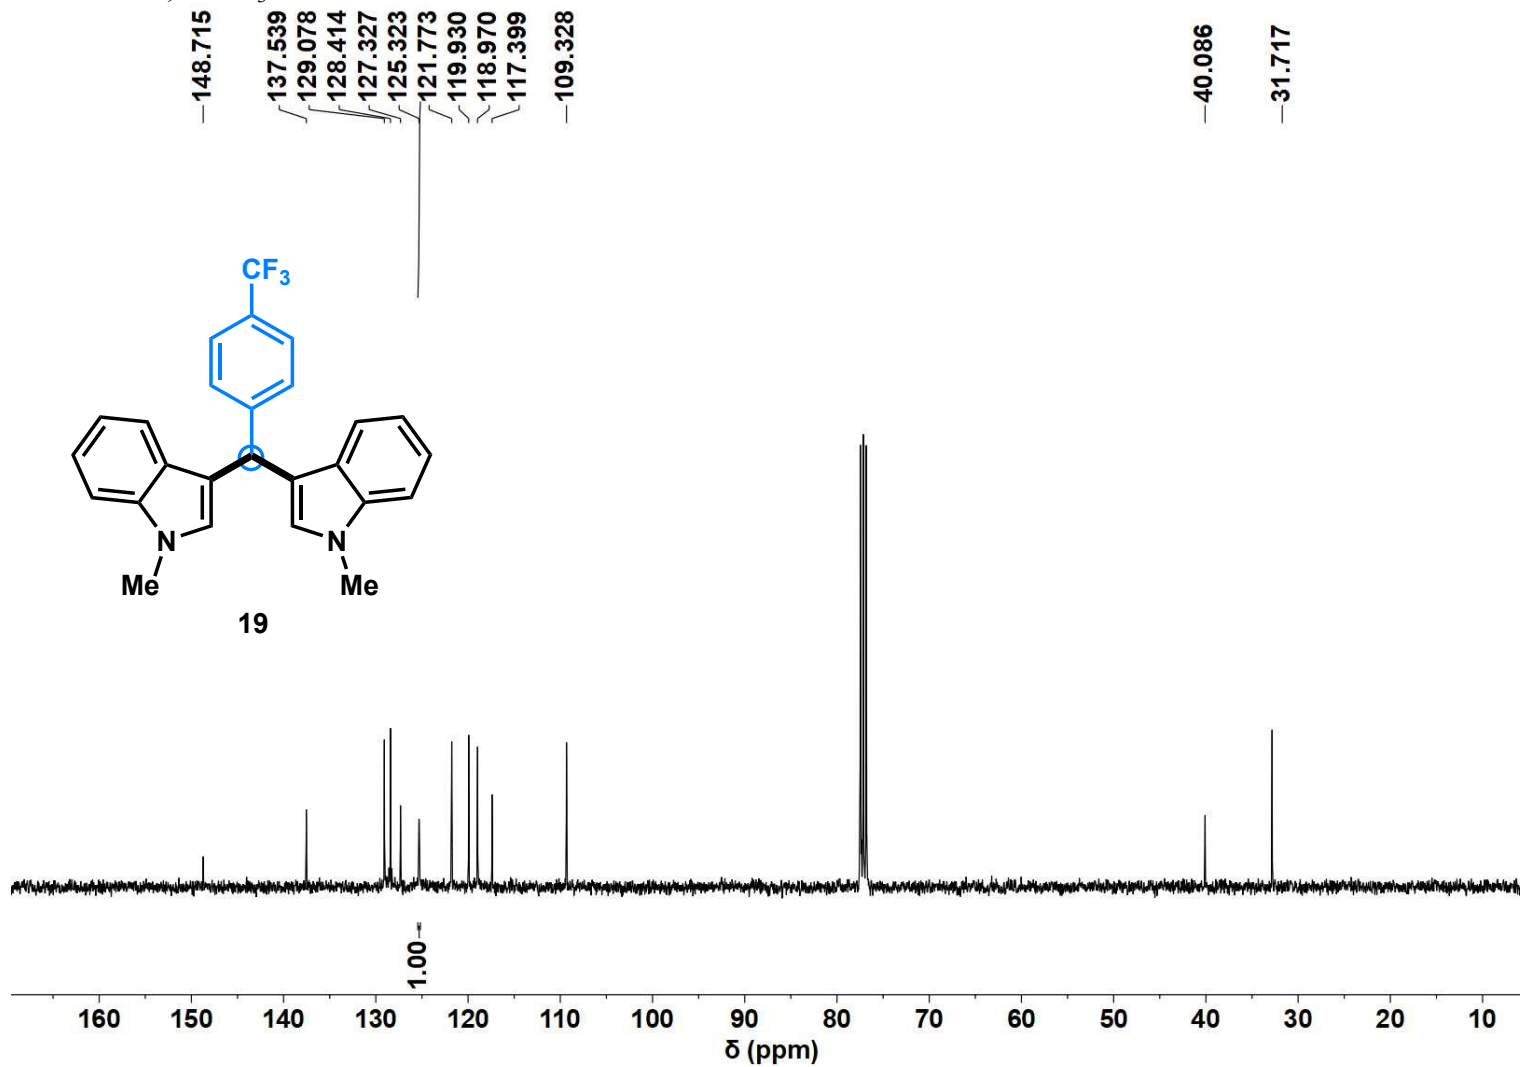

$^{19}\text{F}$  NMR 376 MHz,  $\text{CDCl}_3$

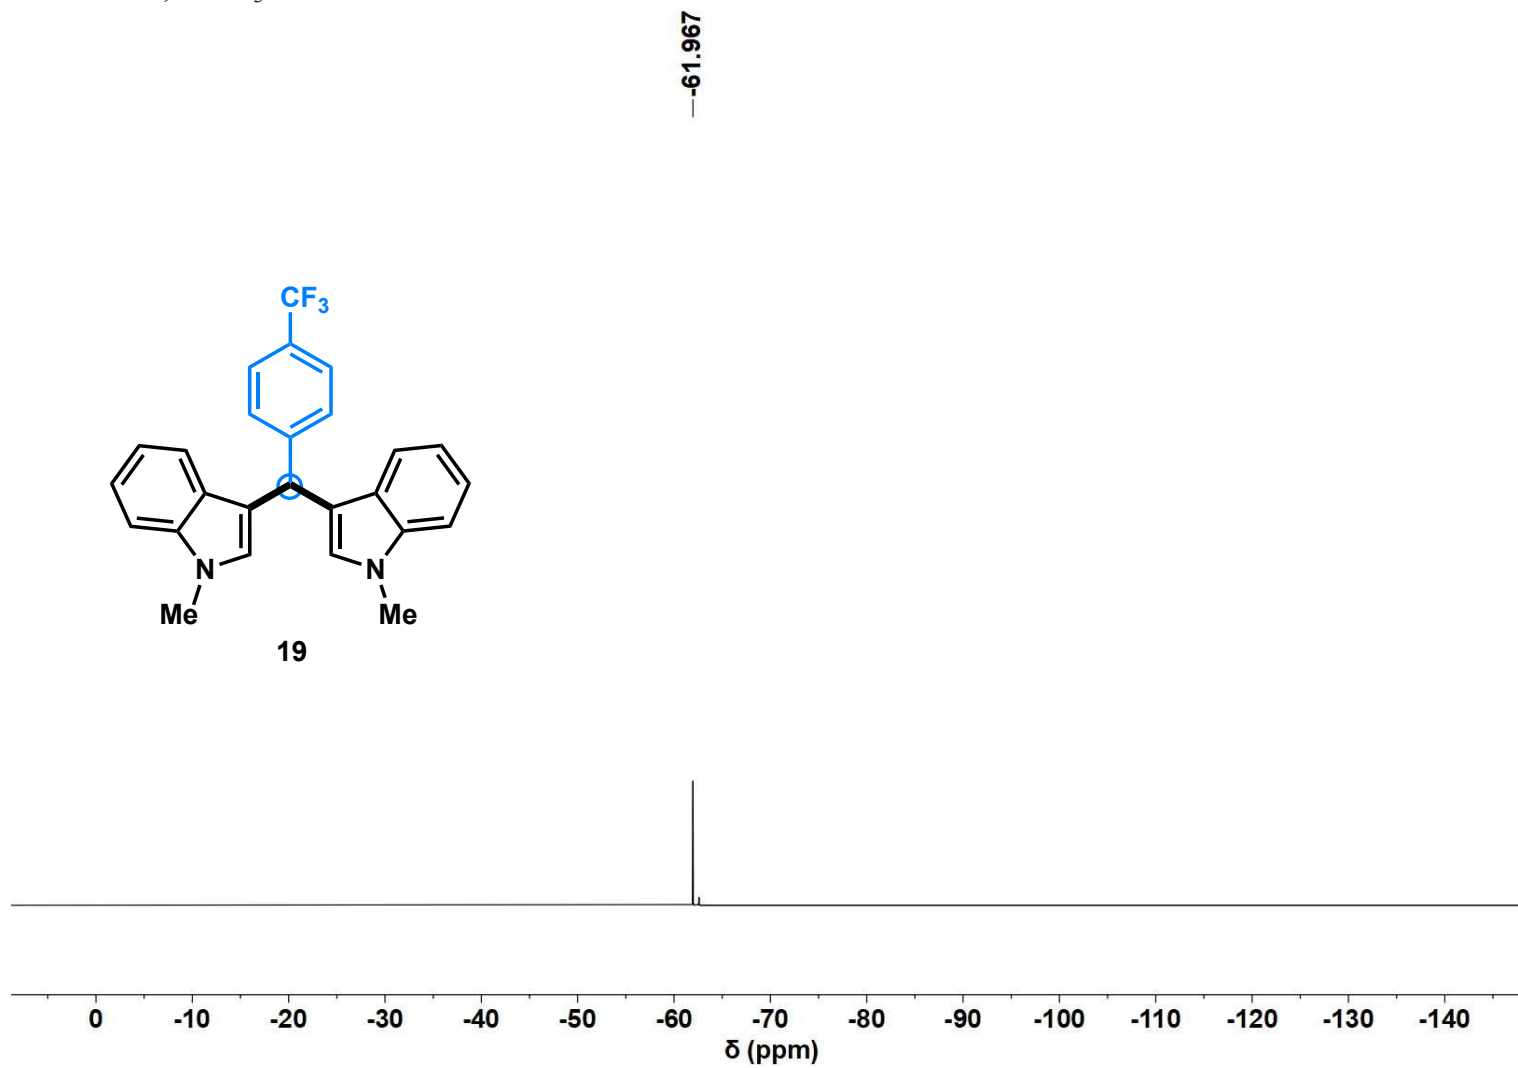

$^1\text{H}$  NMR 400 MHz,  $\text{DMSO-}d_6$

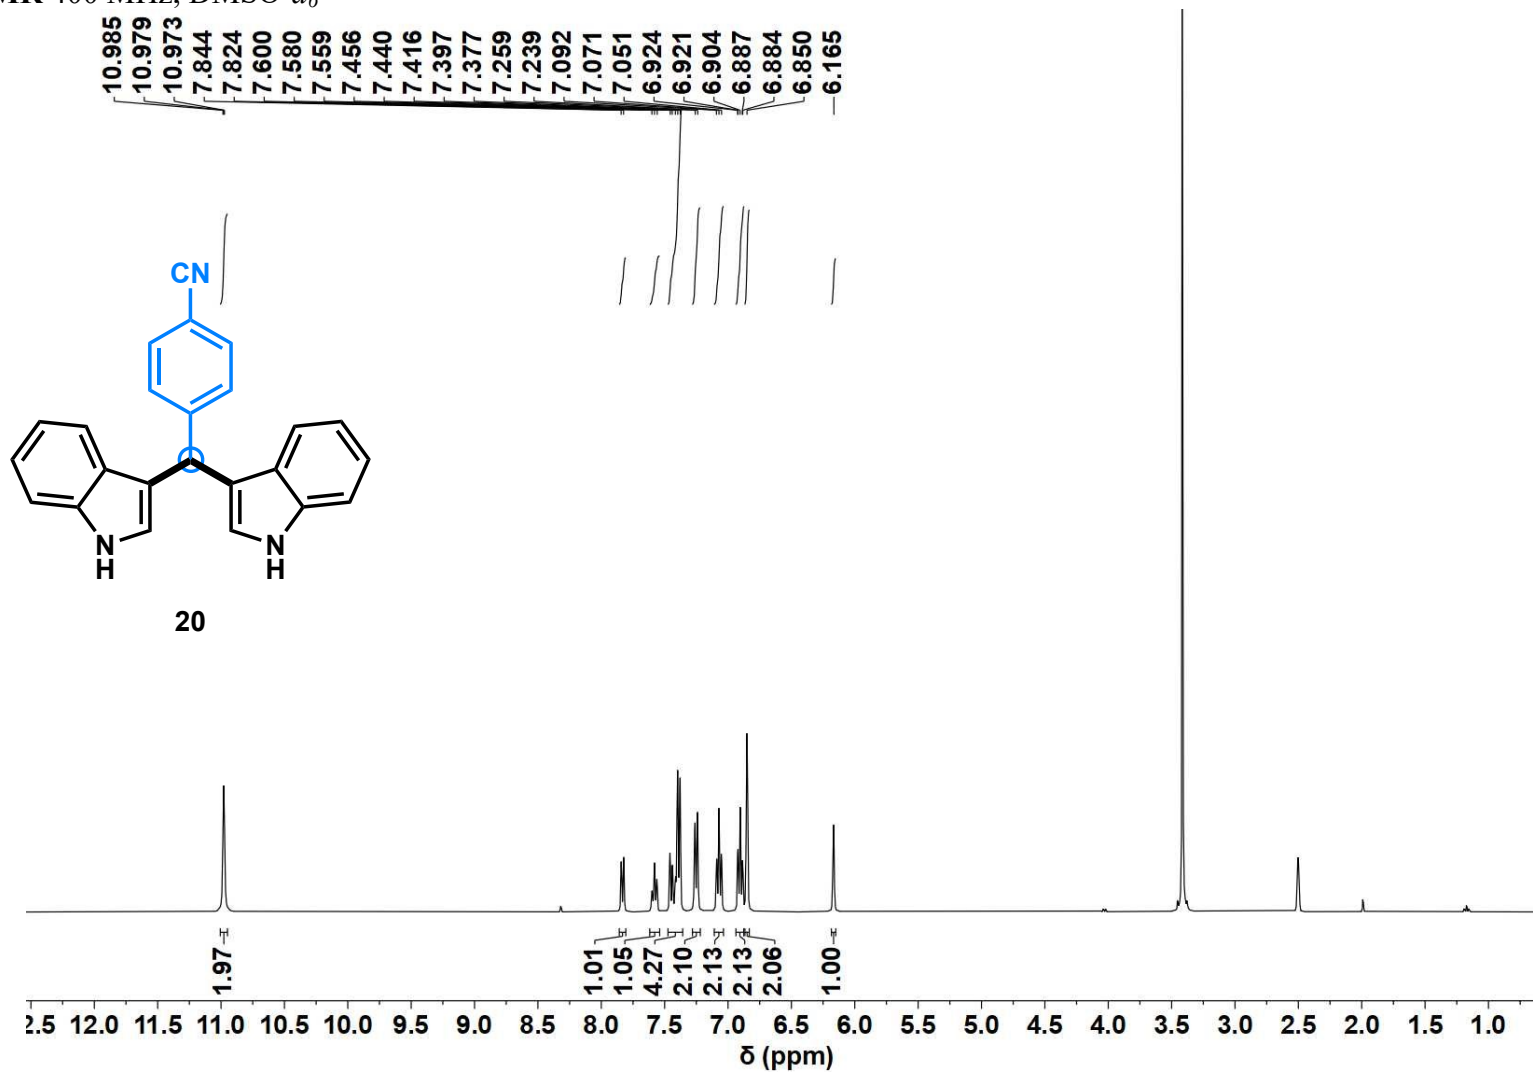



<sup>13</sup>C NMR 101 MHz, DMSO-*d*<sub>6</sub>

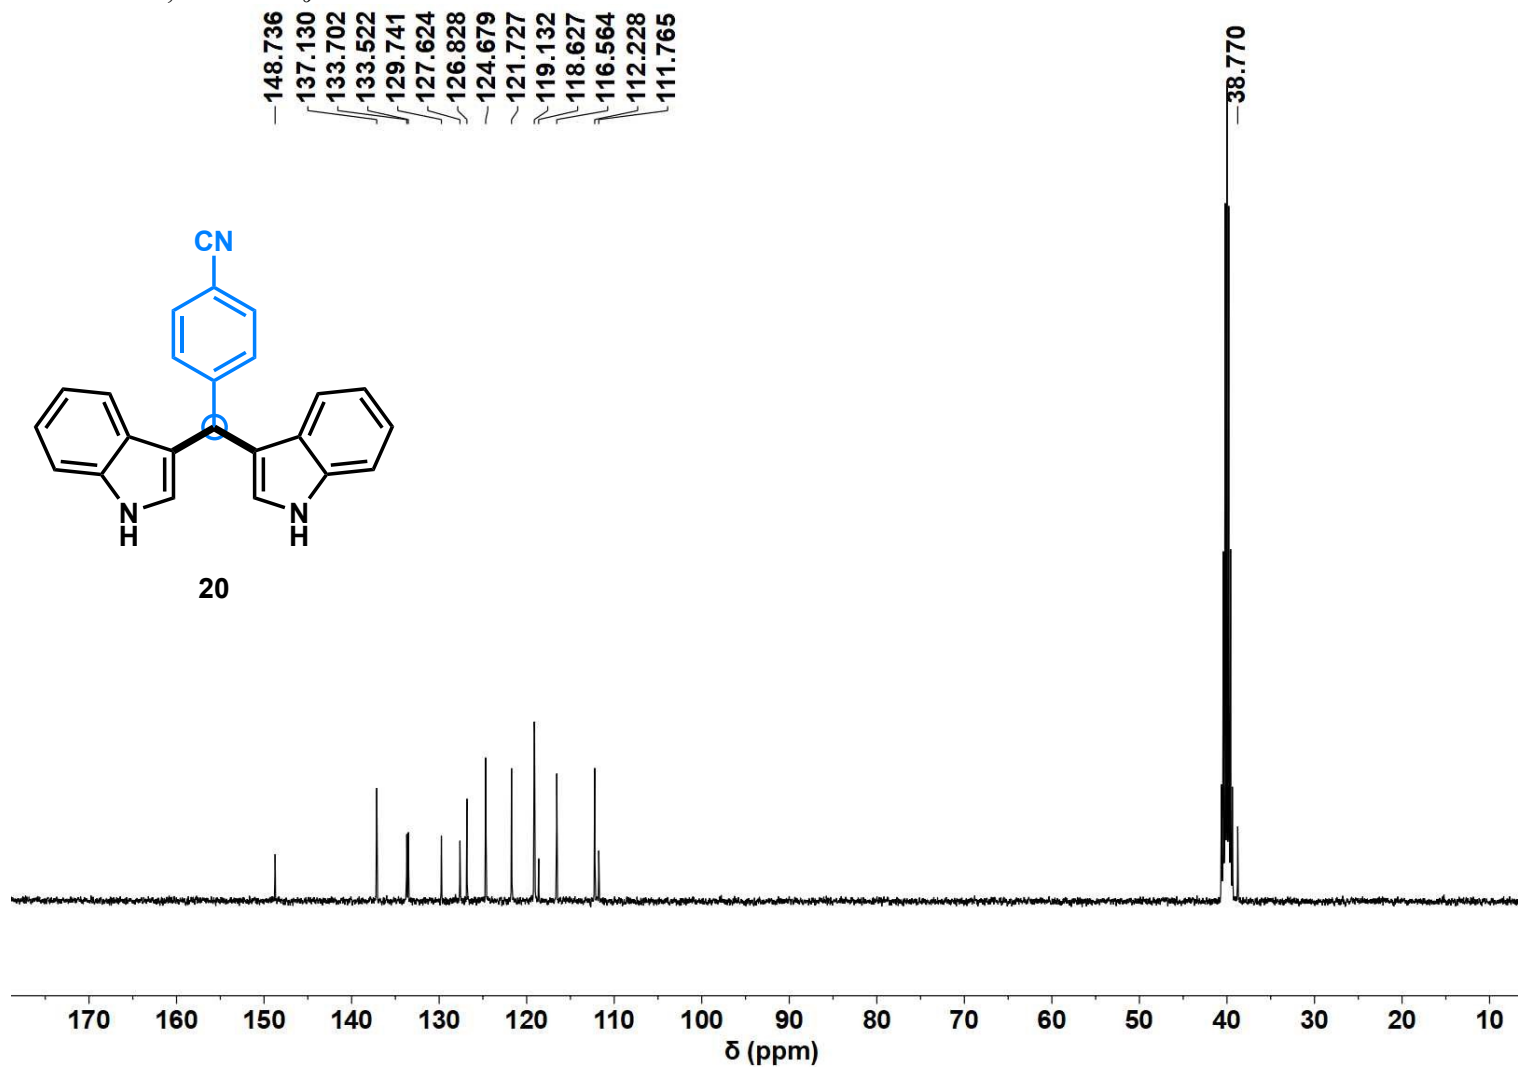

$^1\text{H}$  NMR 400 MHz,  $\text{CDCl}_3$

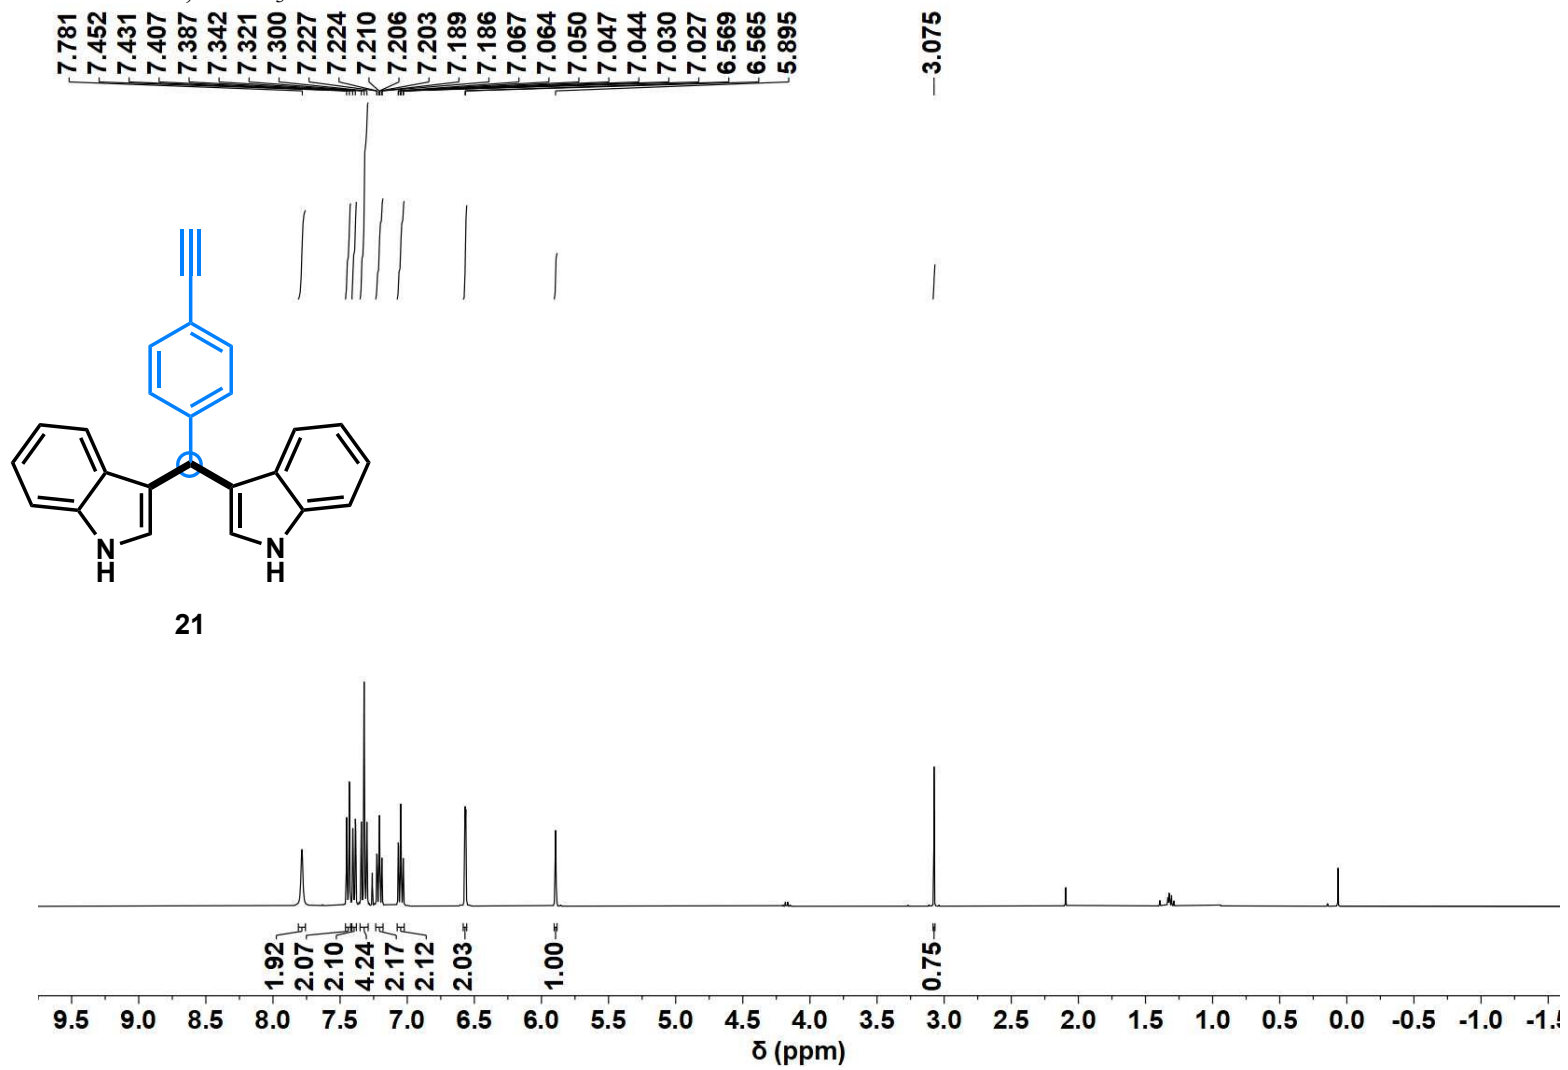

<sup>13</sup>C NMR 101 MHz, CDCl<sub>3</sub>

145.210  
136.761  
132.274  
128.876  
127.021  
123.809  
122.181  
119.945  
119.888  
119.468  
119.095  
112.429

85.011

40.214

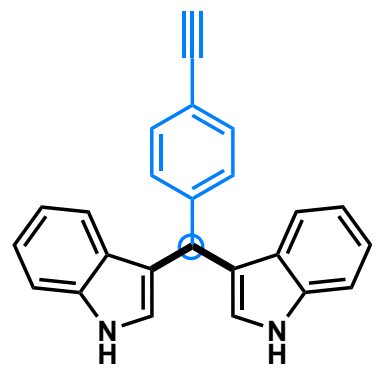

21

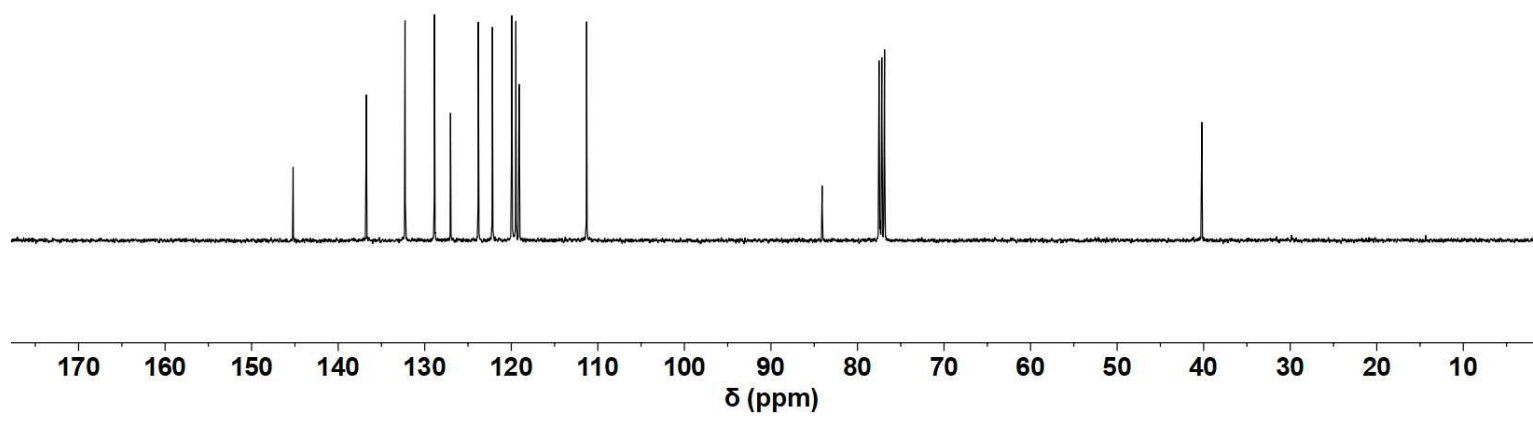

<sup>1</sup>H NMR 400 MHz, CDCl<sub>3</sub>

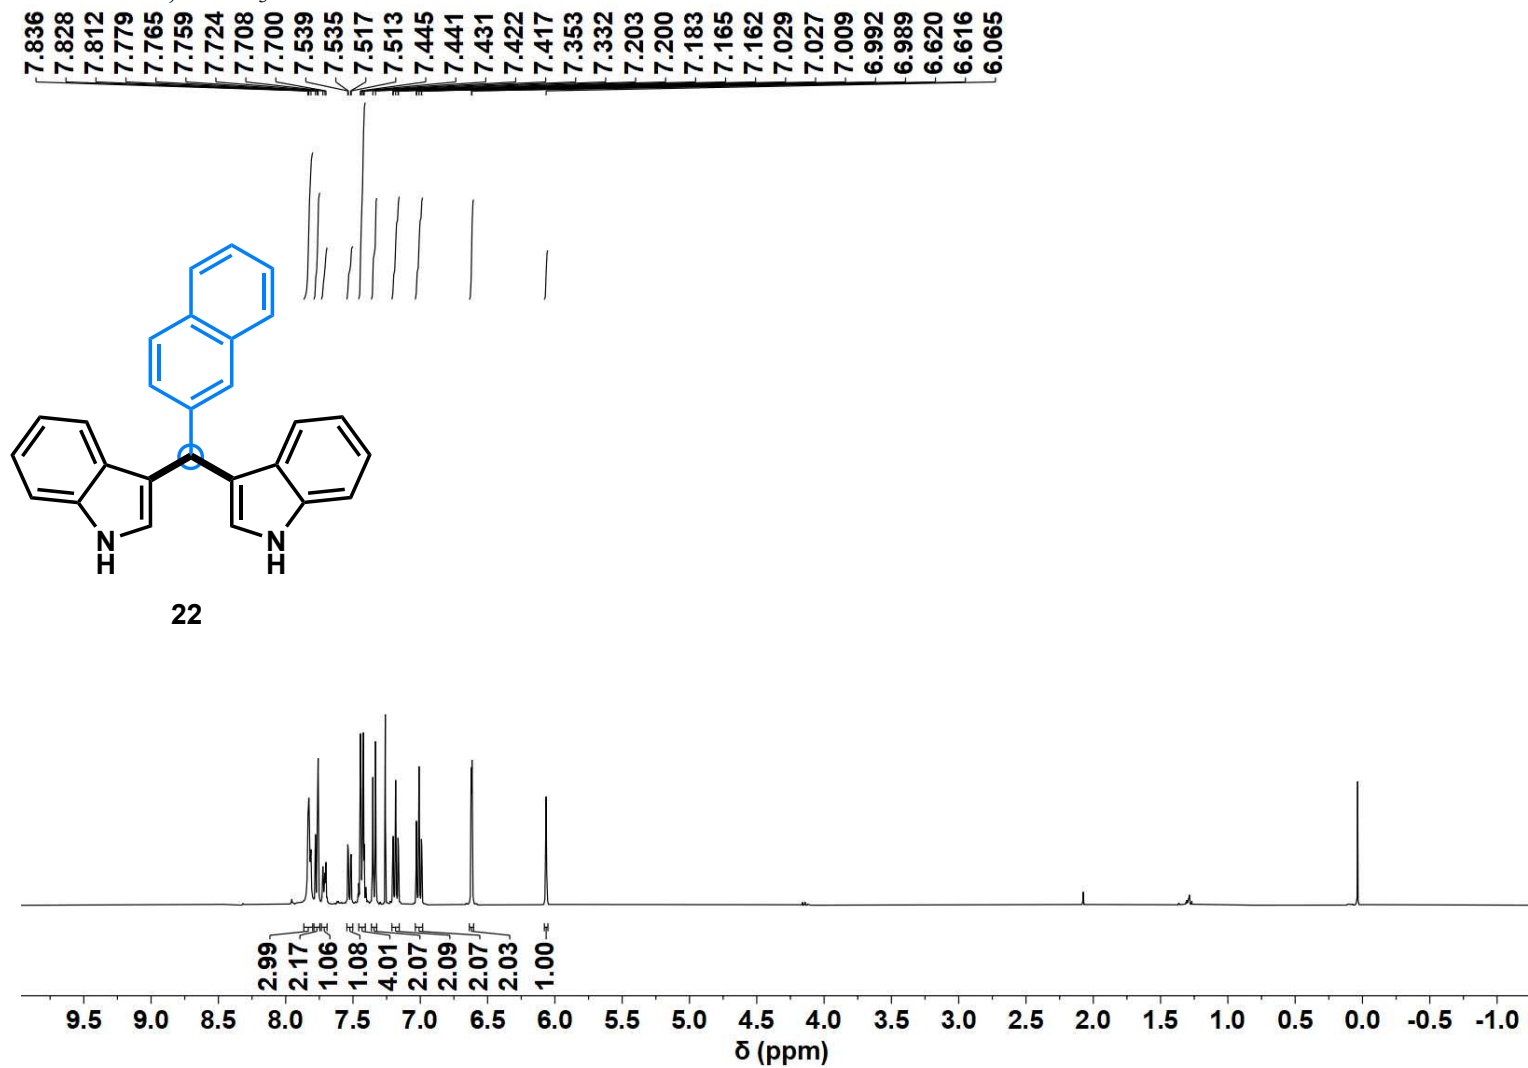

<sup>13</sup>C NMR 101 MHz, CDCl<sub>3</sub>

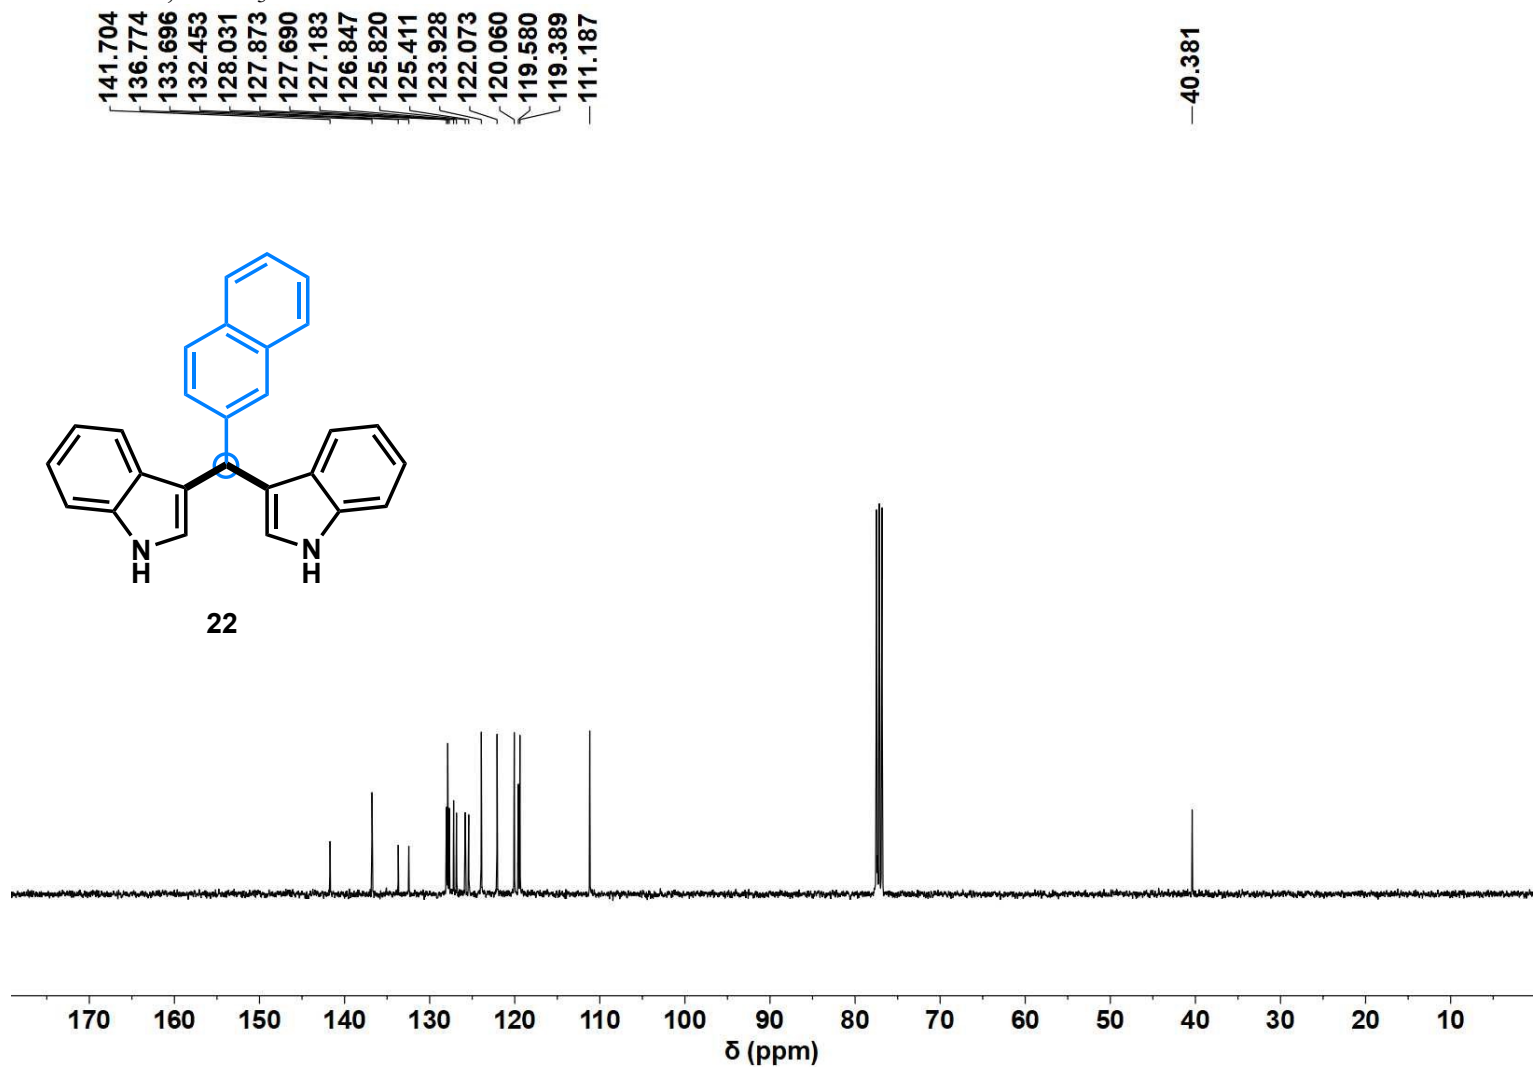

$^1\text{H}$  NMR 400 MHz, DMSO- $d_6$

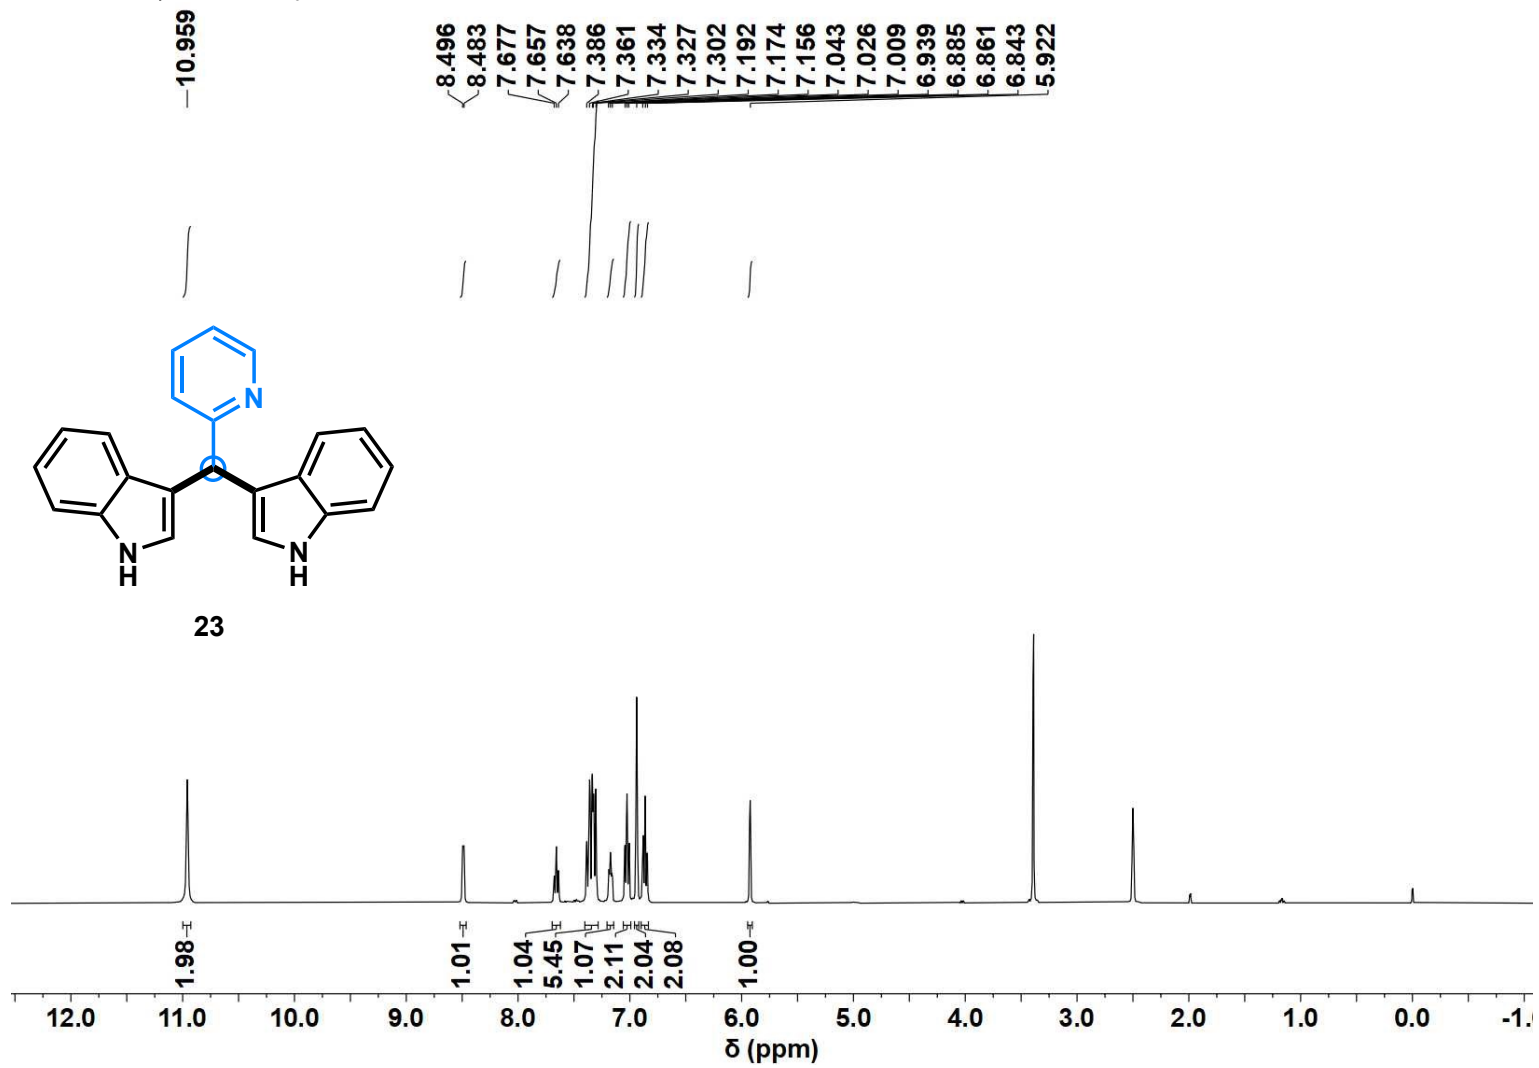

$^{13}\text{C}$  NMR 101 MHz,  $\text{DMSO-}d_6$

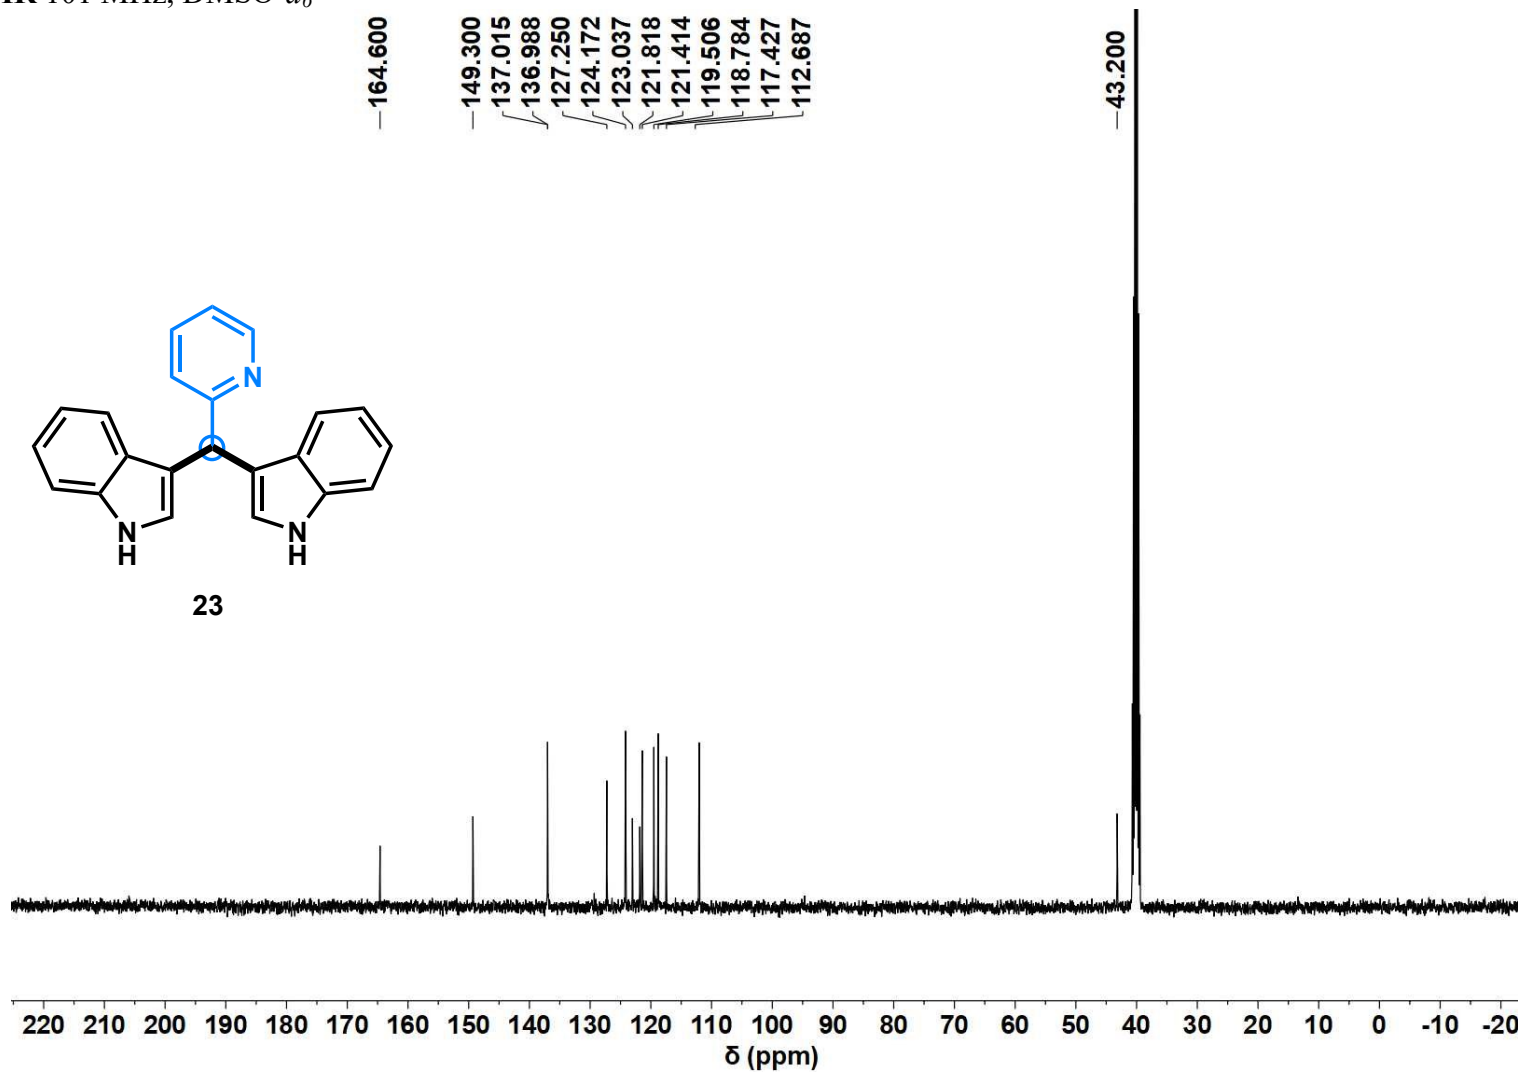

$^1\text{H}$  NMR 400 MHz, DMSO- $d_6$

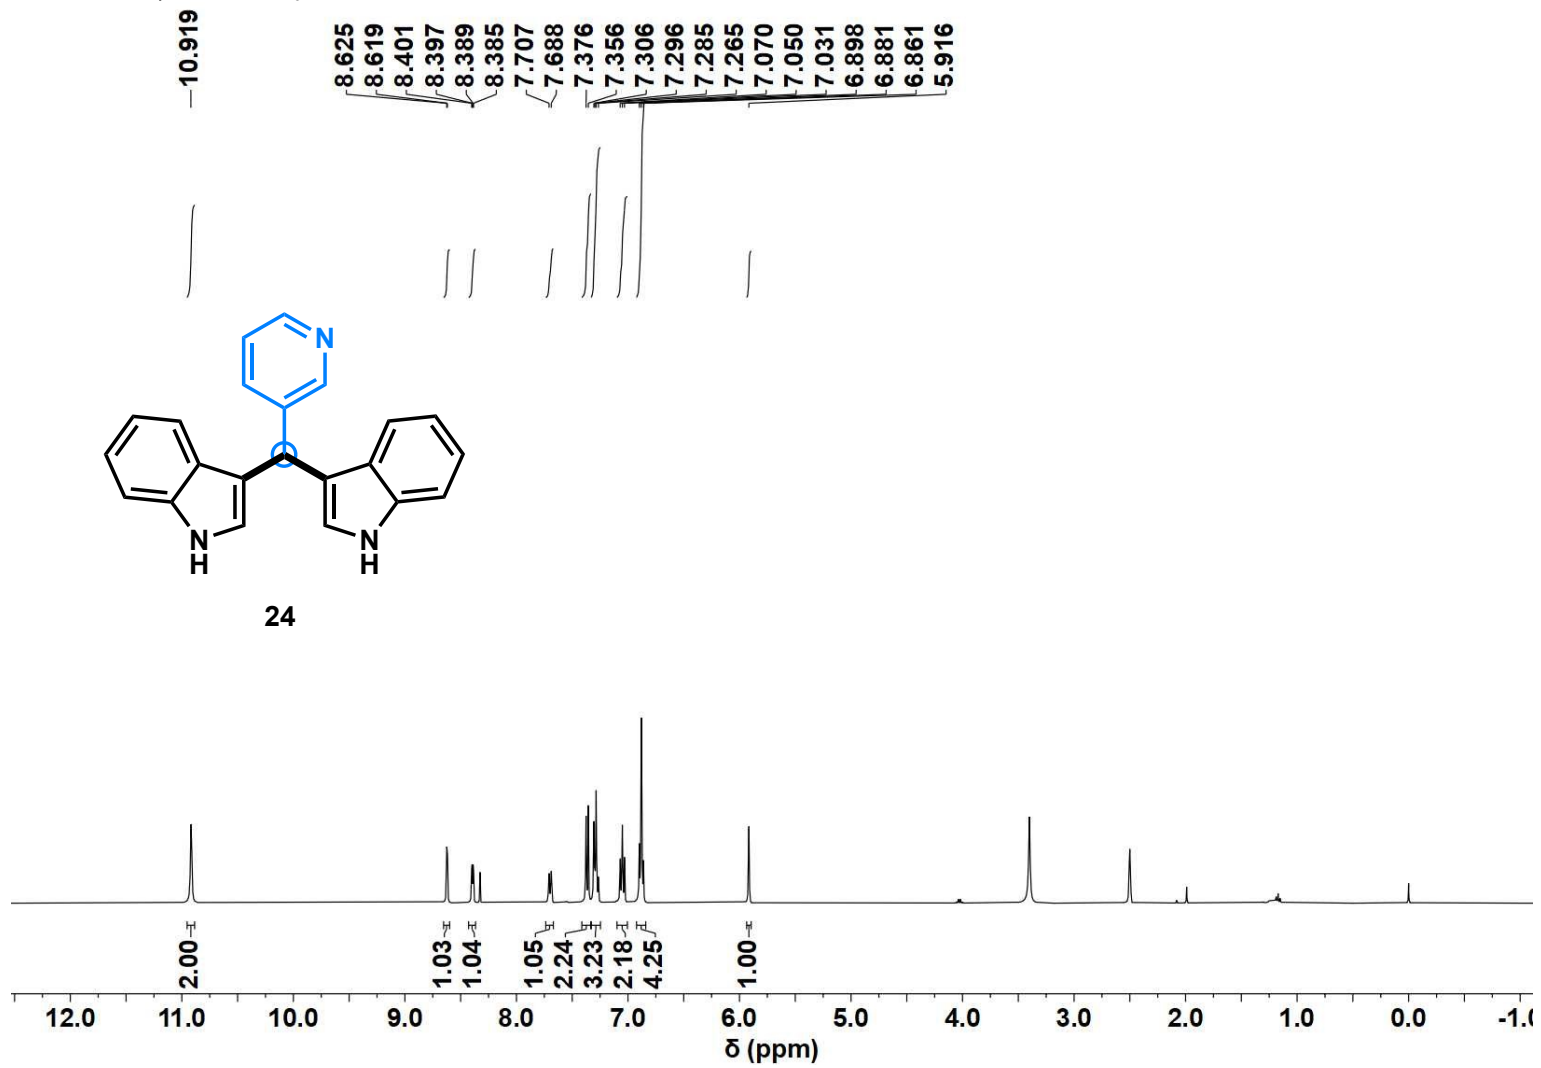



<sup>13</sup>C NMR 101 MHz, DMSO-*d*<sub>6</sub>

150.191  
147.690  
140.812  
137.127  
136.153  
126.906  
124.223  
123.851  
121.589  
119.501  
118.879  
117.670  
112.099

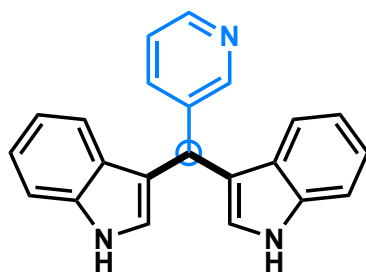

24

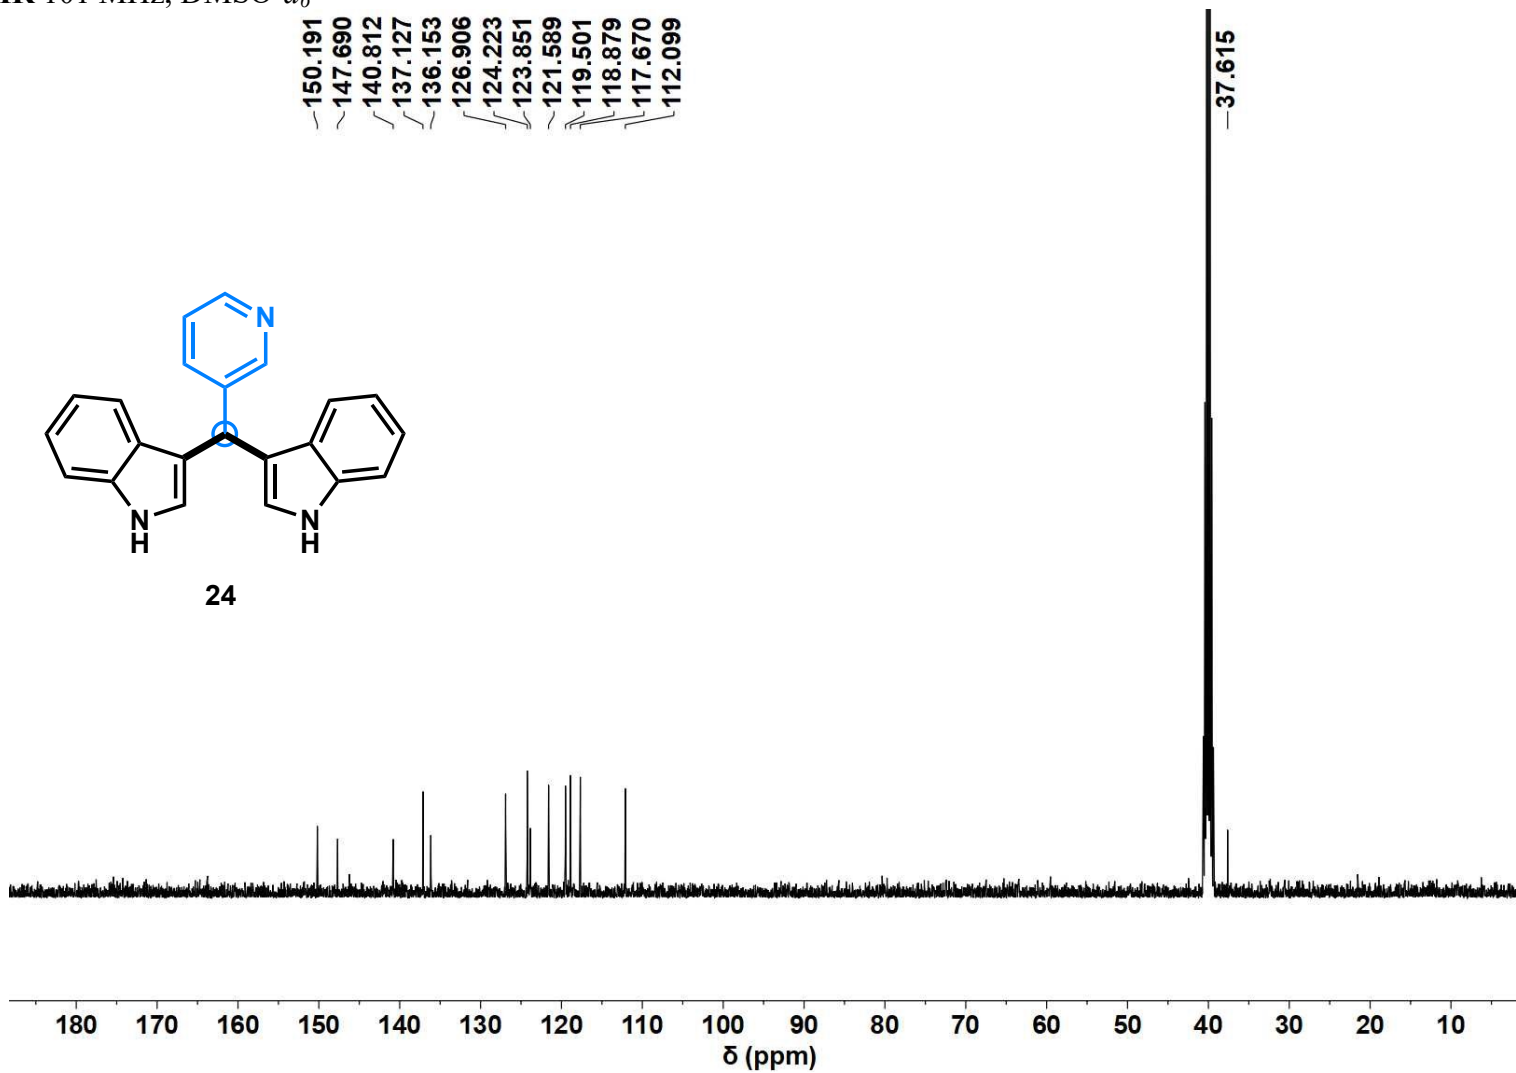

$^1\text{H}$  NMR 400 MHz,  $\text{CDCl}_3$

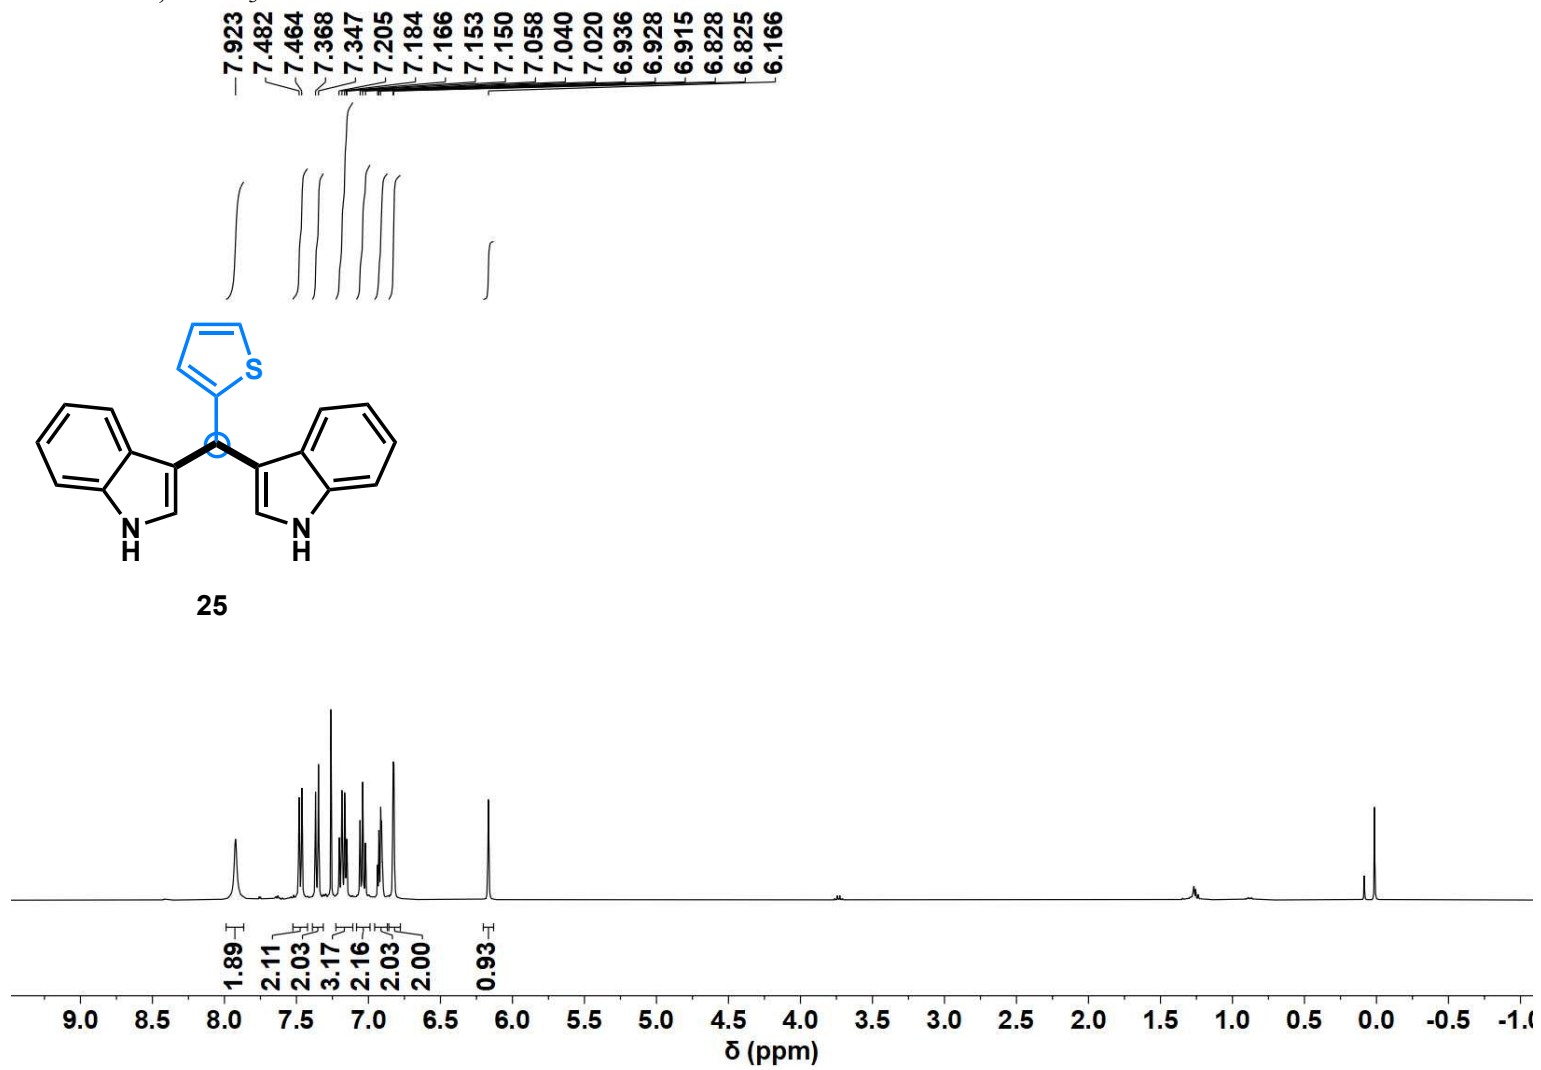

$^{13}\text{C}$  NMR 101 MHz,  $\text{CDCl}_3$

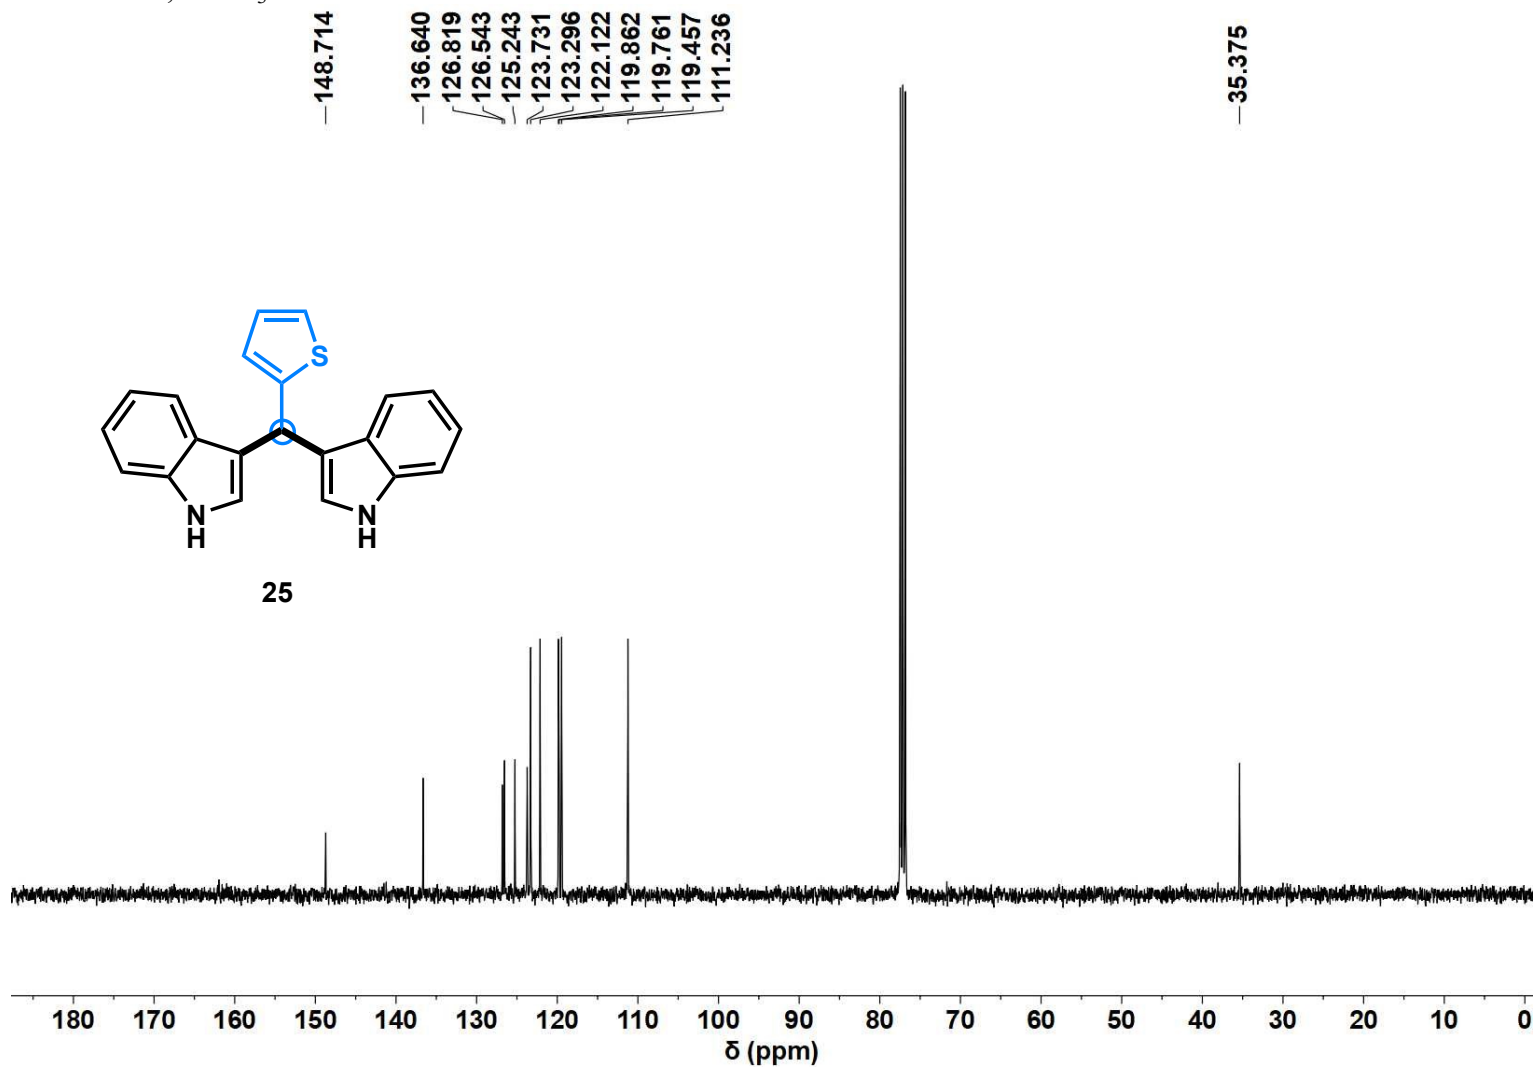

$^1\text{H}$  NMR 400 MHz,  $\text{CDCl}_3$

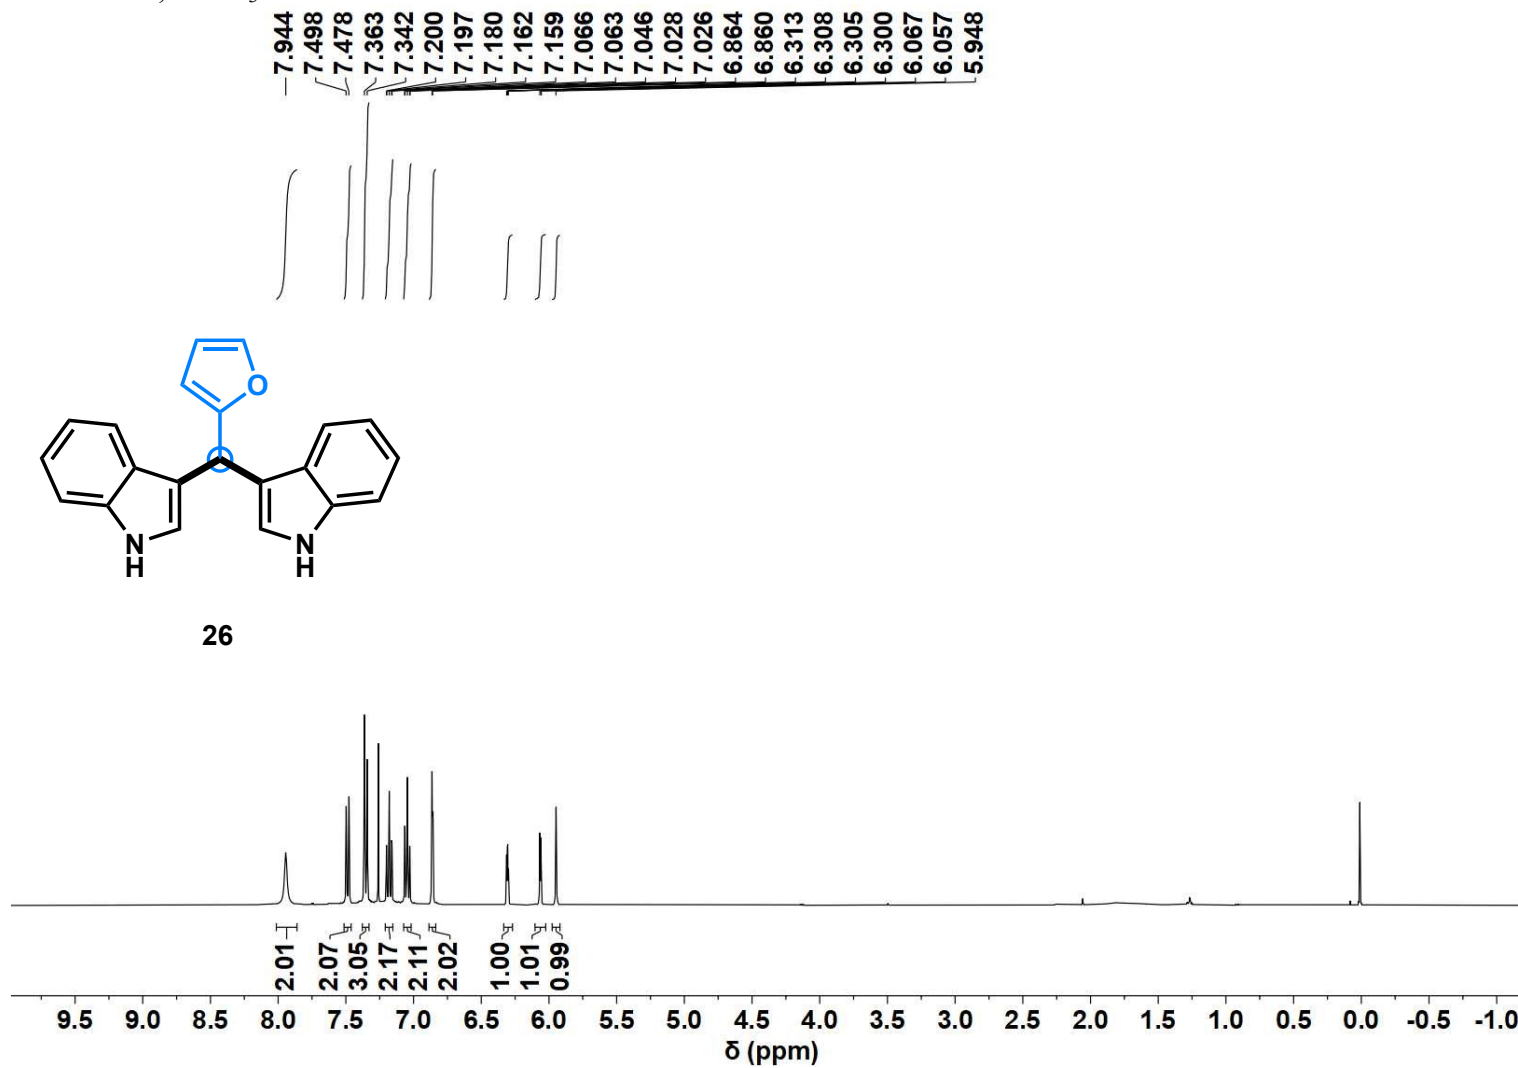

$^{13}\text{C}$  NMR 101 MHz,  $\text{CDCl}_3$

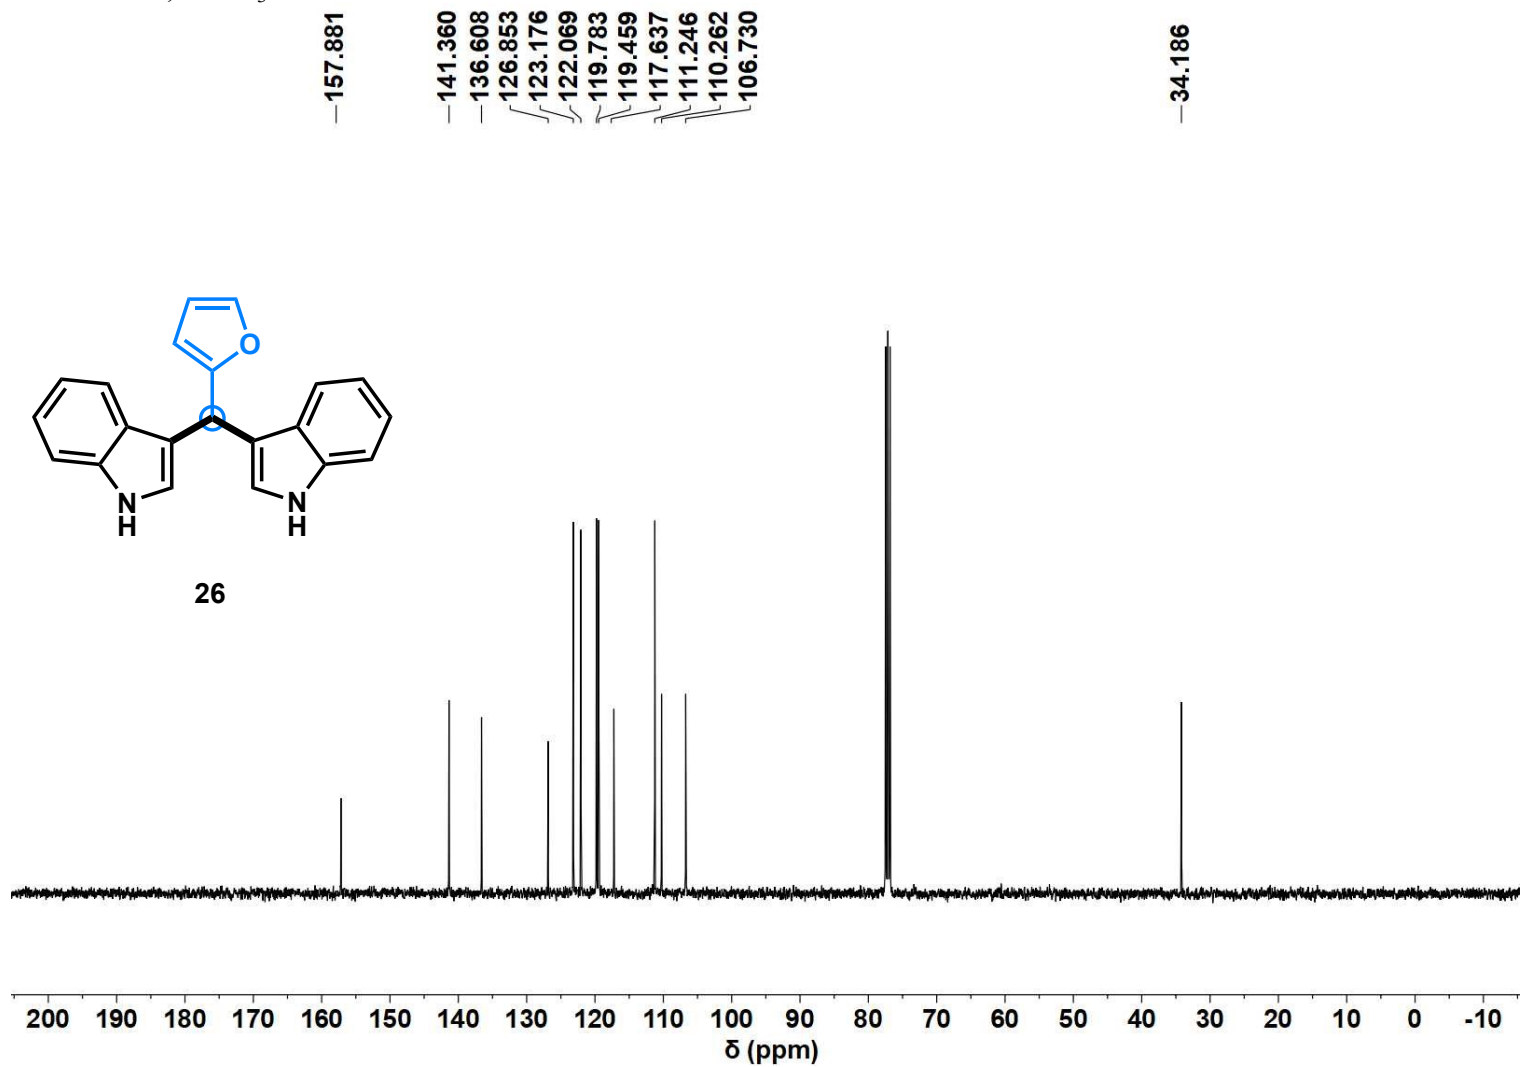

$^1\text{H}$  NMR 400 MHz,  $\text{DMSO-}d_6$

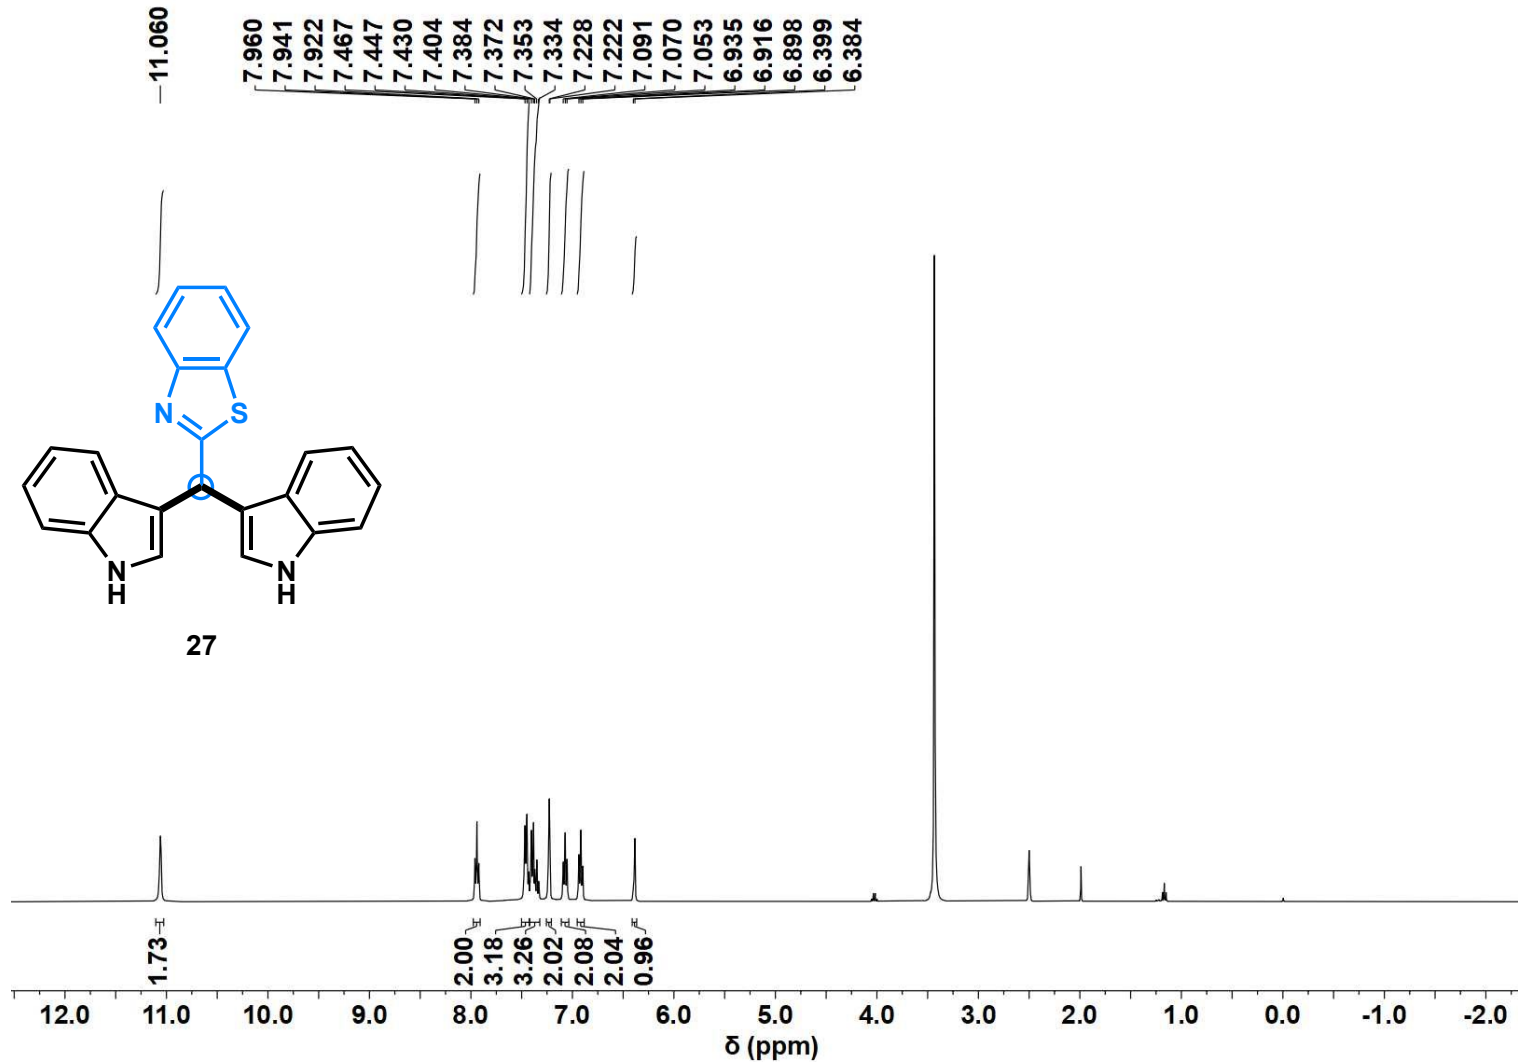

$^{13}\text{C}$  NMR 101 MHz,  $\text{DMSO-}d_6$

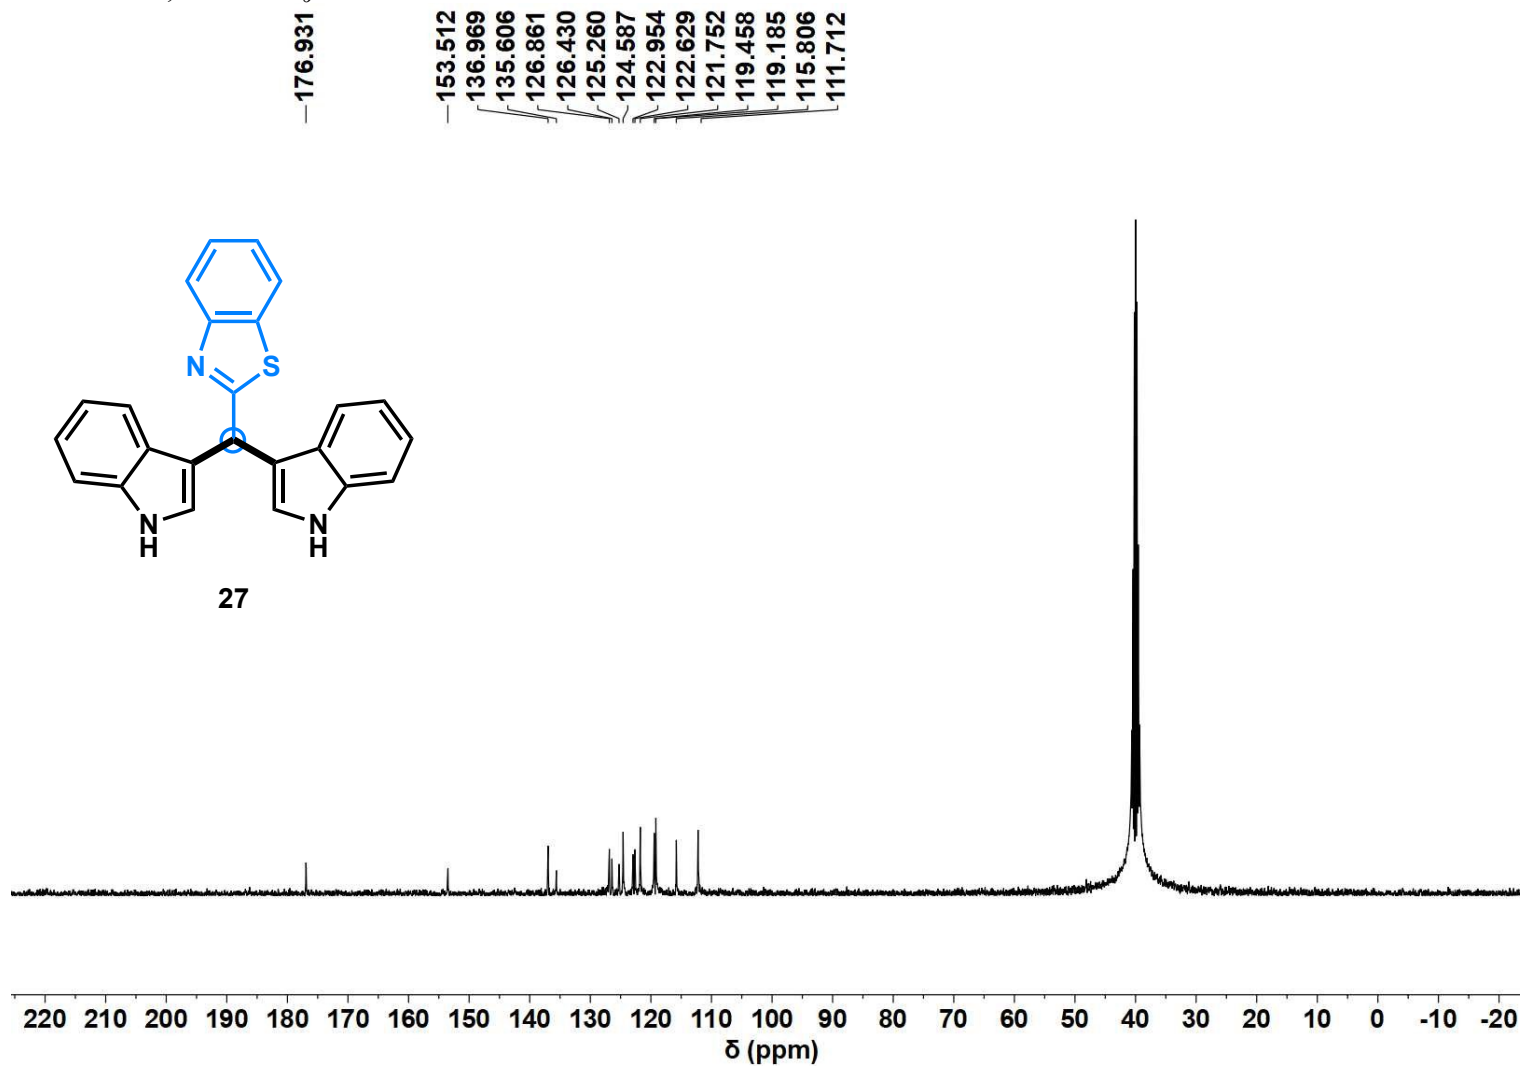

$^1\text{H}$  NMR 400 MHz,  $\text{DMSO-}d_6$

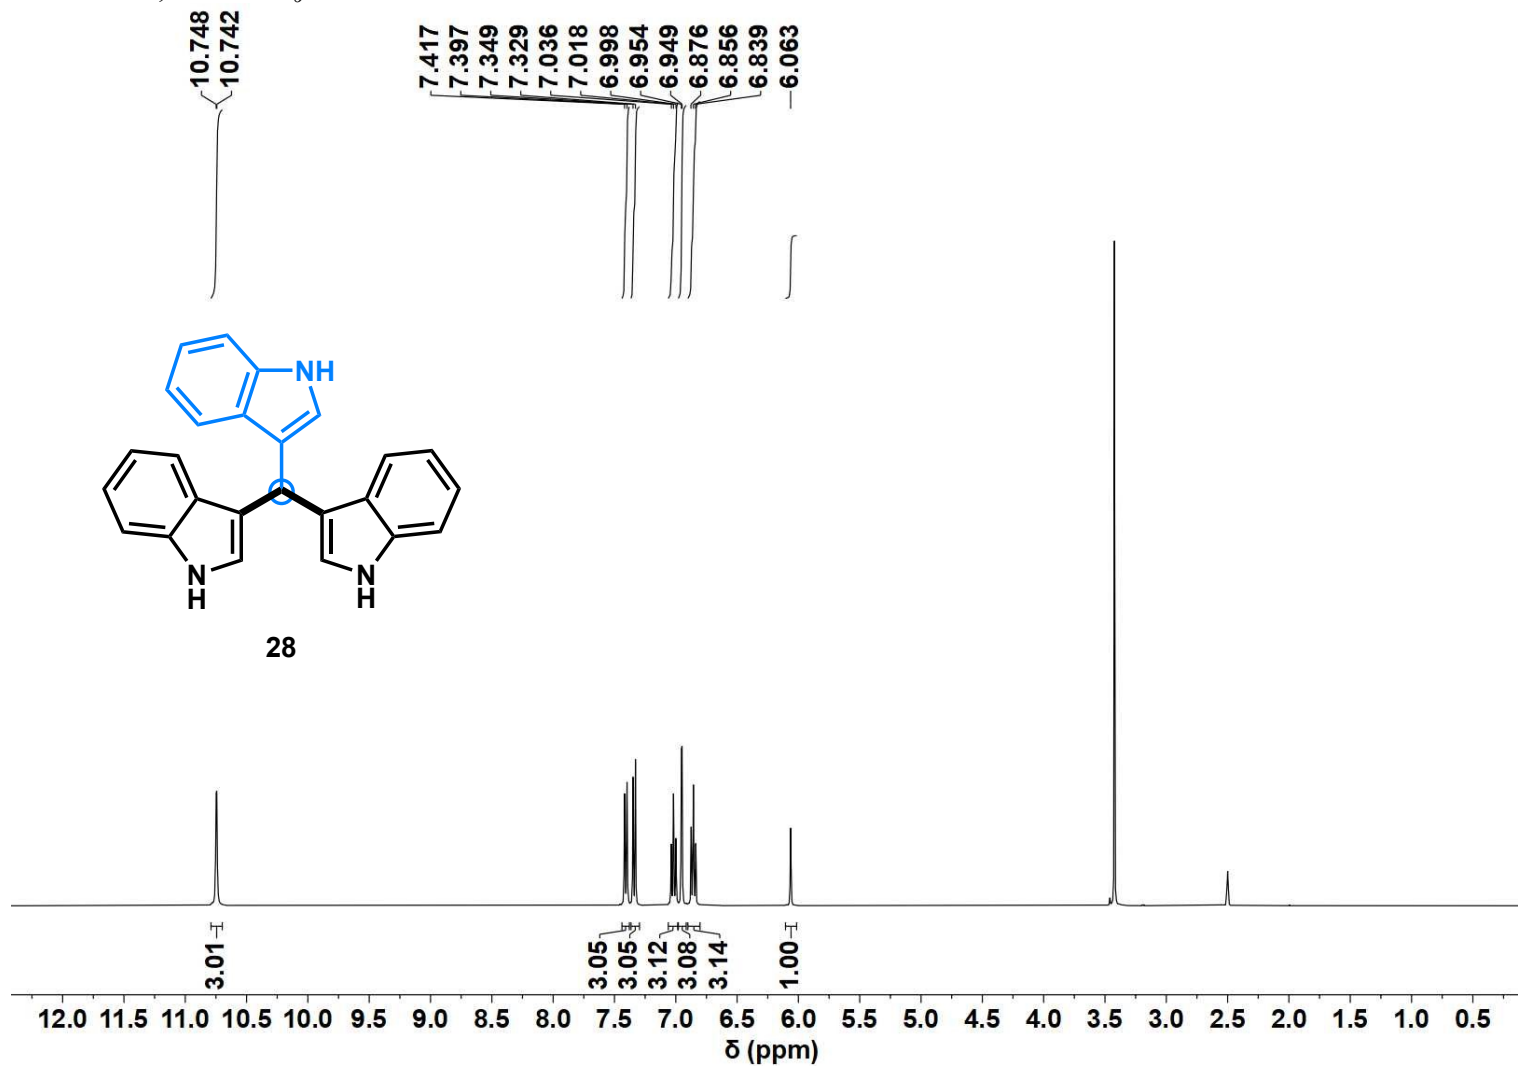



$^{13}\text{C}$  NMR 400 MHz,  $\text{DMSO-}d_6$

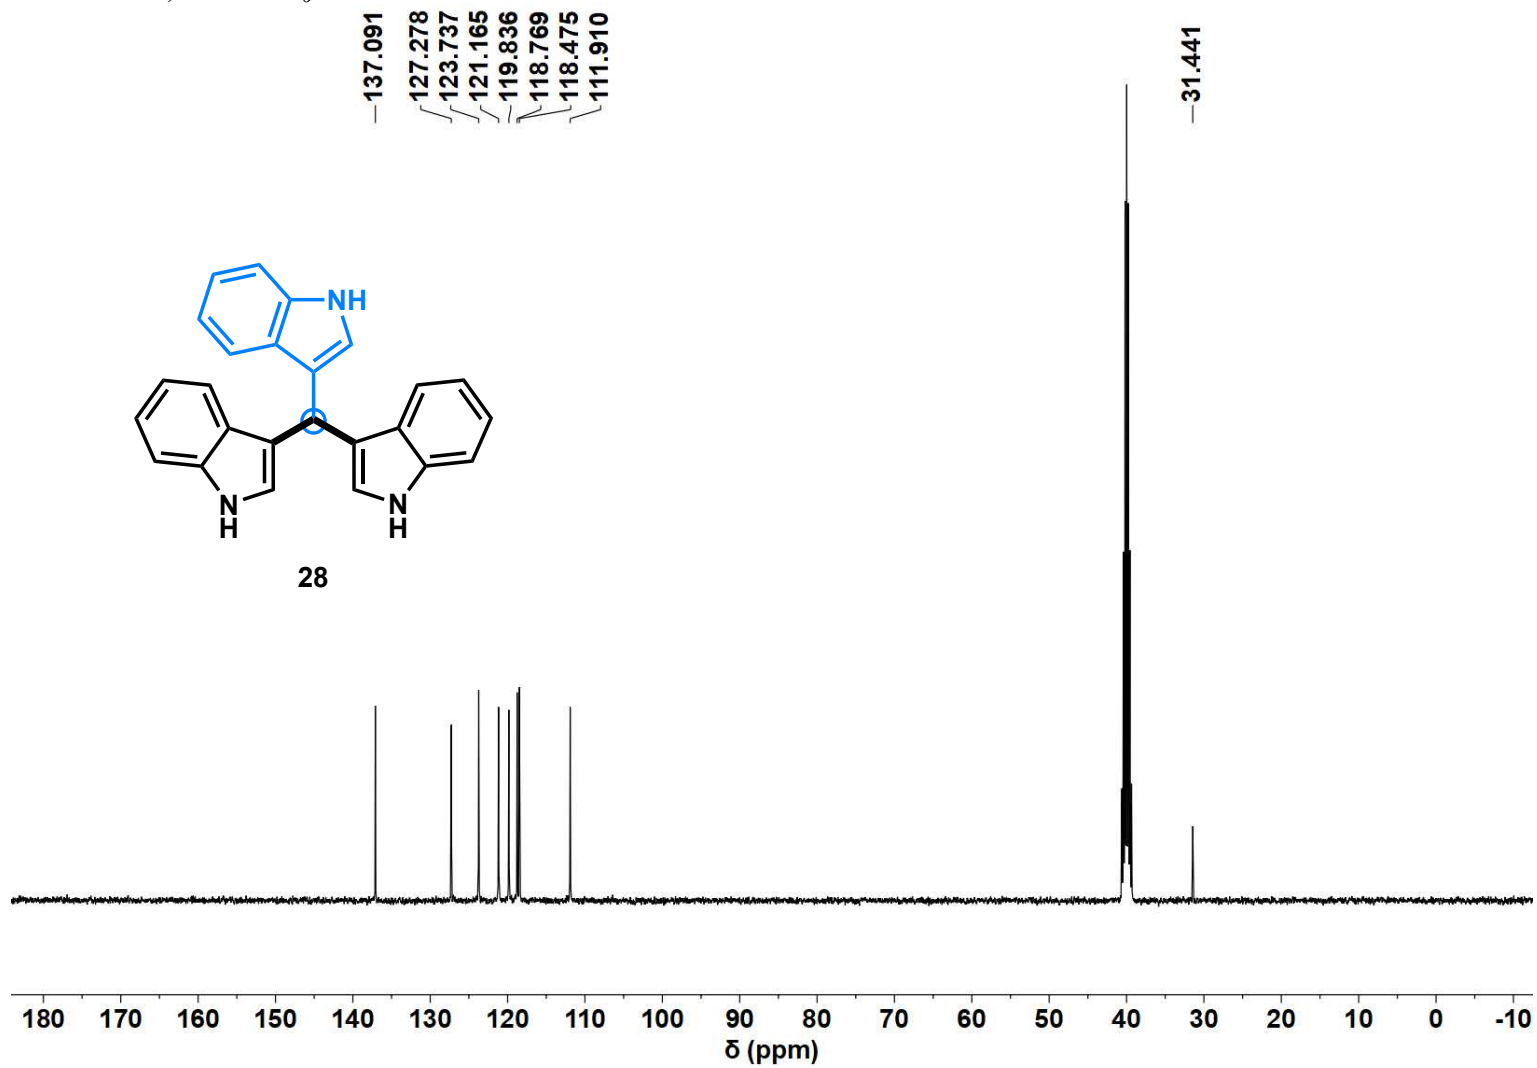

<sup>1</sup>H NMR 400 MHz, CDCl<sub>3</sub>

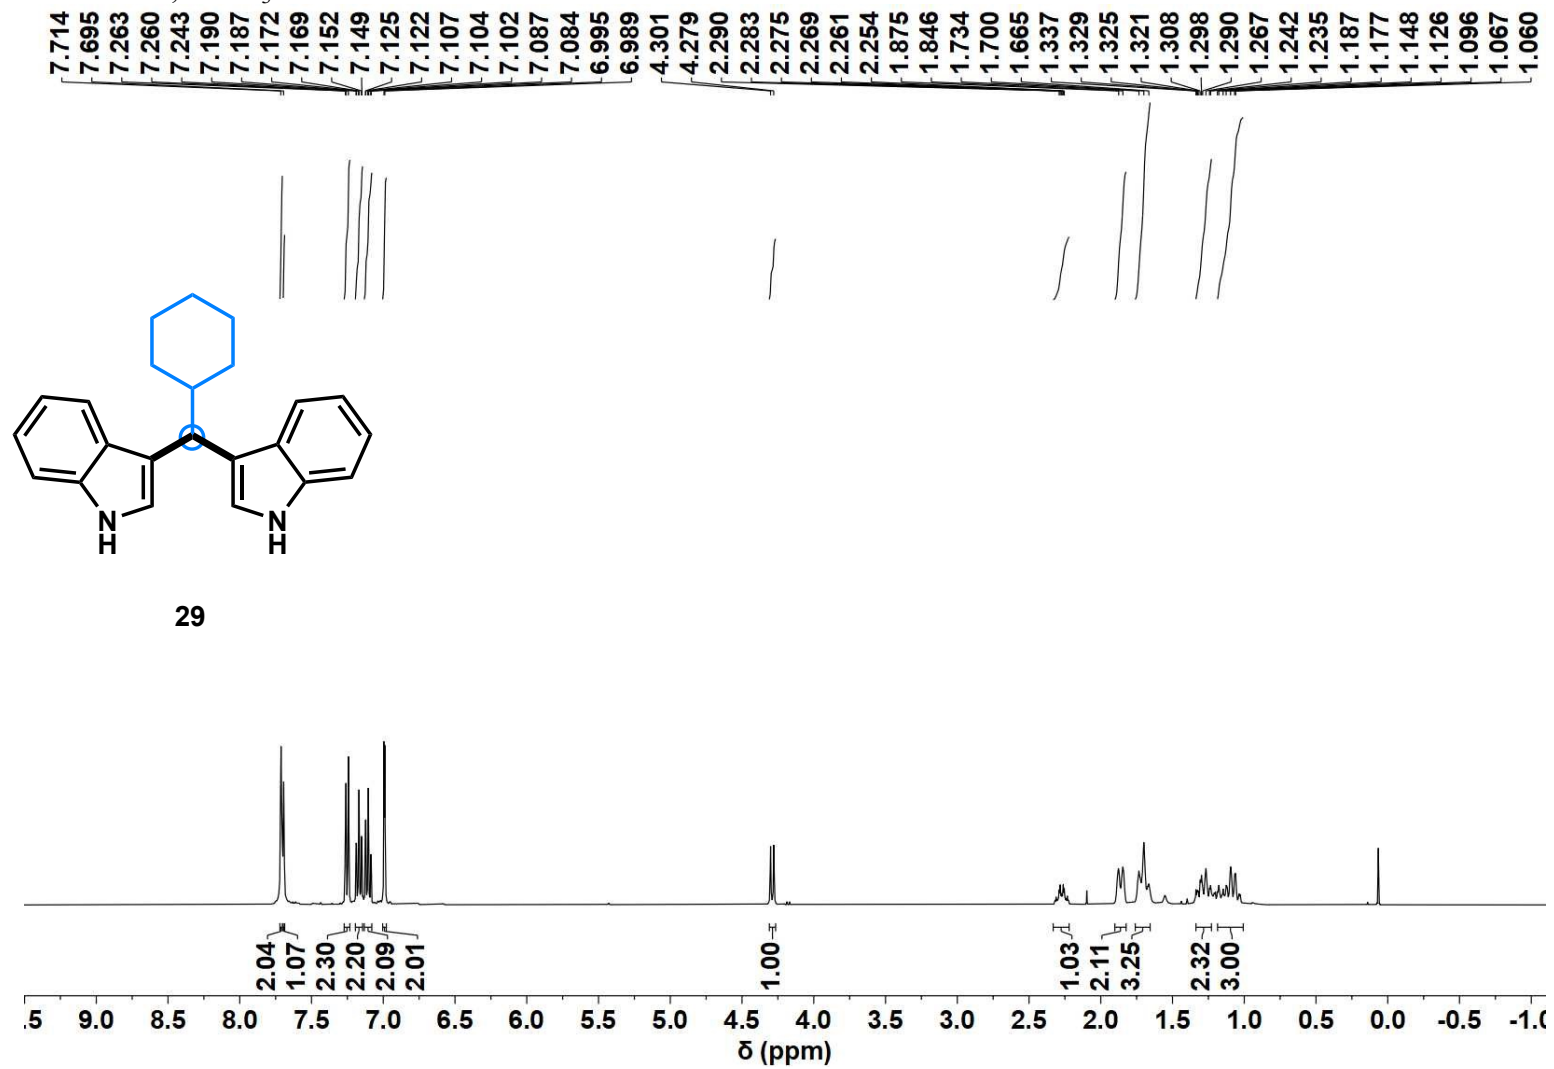

$^{13}\text{C}$  NMR 101 MHz,  $\text{CDCl}_3$

136.334  
127.877  
121.701  
119.869  
119.803  
119.075  
111.121

43.044  
40.234  
32.477  
26.827  
26.784

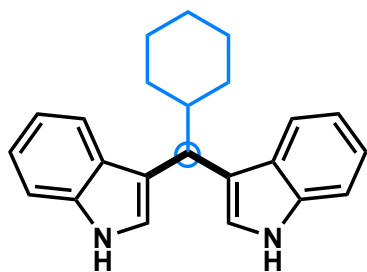

29

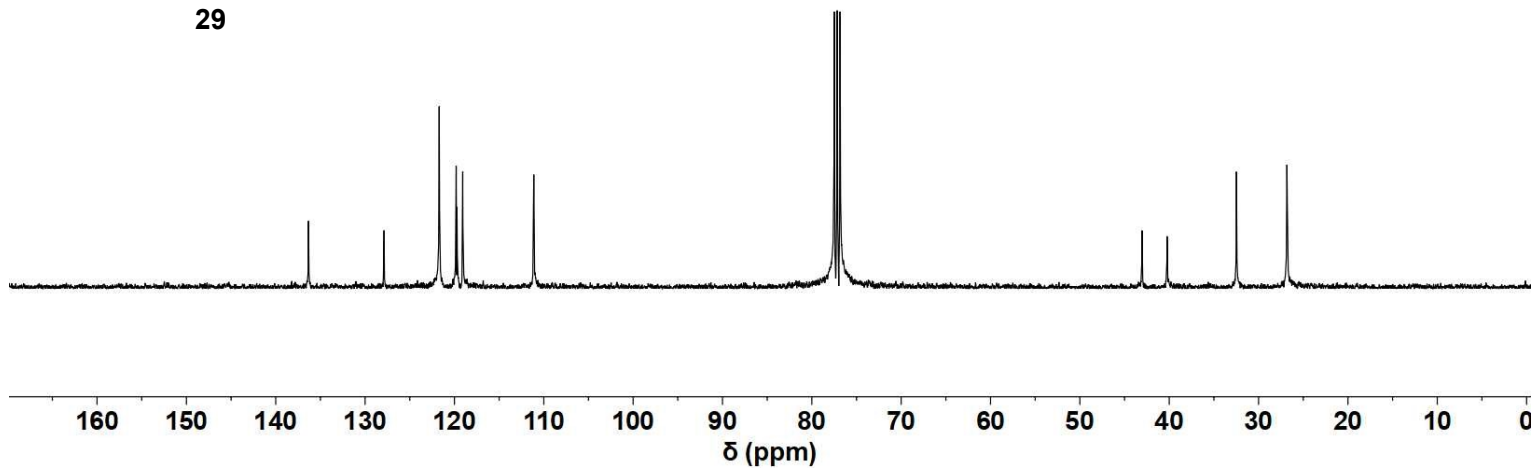

<sup>1</sup>H NMR 400 MHz, CDCl<sub>3</sub>

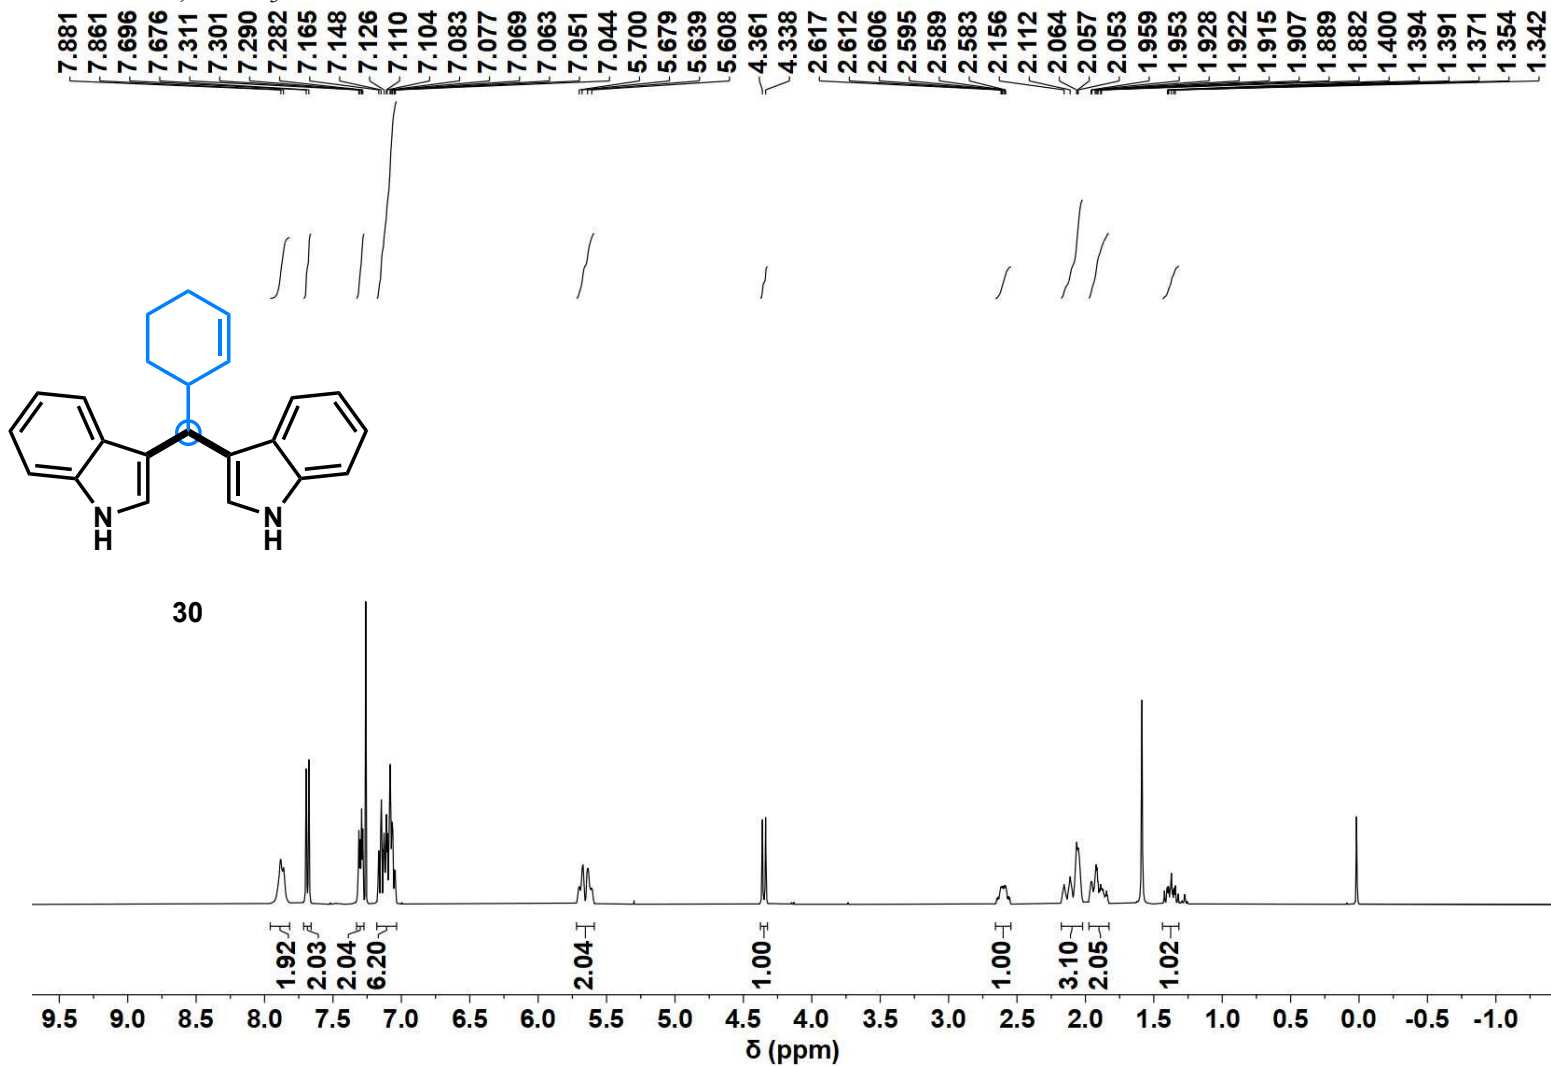

$^{13}\text{C}$  NMR 101 MHz,  $\text{CDCl}_3$

136.363  
136.330  
127.848  
127.670  
127.122  
127.012  
121.791  
121.733  
121.595  
119.712  
119.533  
119.479  
119.156  
111.157

39.380  
38.880  
30.964  
27.351  
25.247

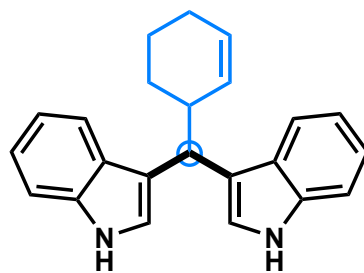

30

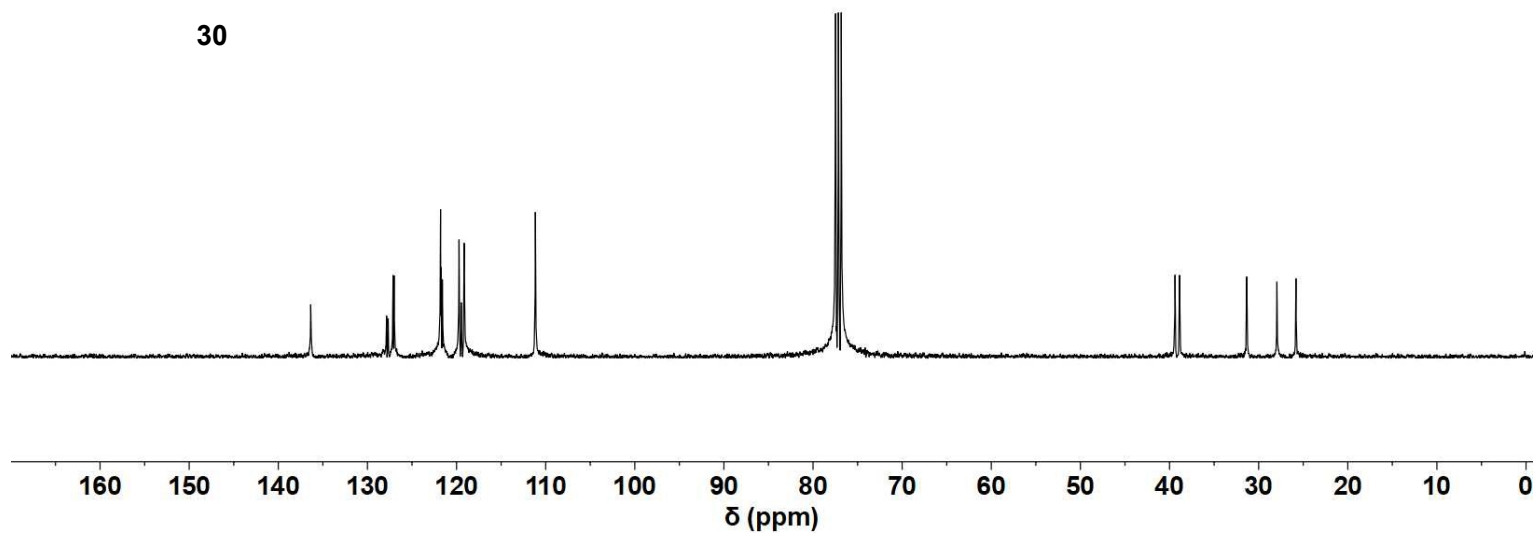

<sup>1</sup>H NMR 400 MHz, CDCl<sub>3</sub>

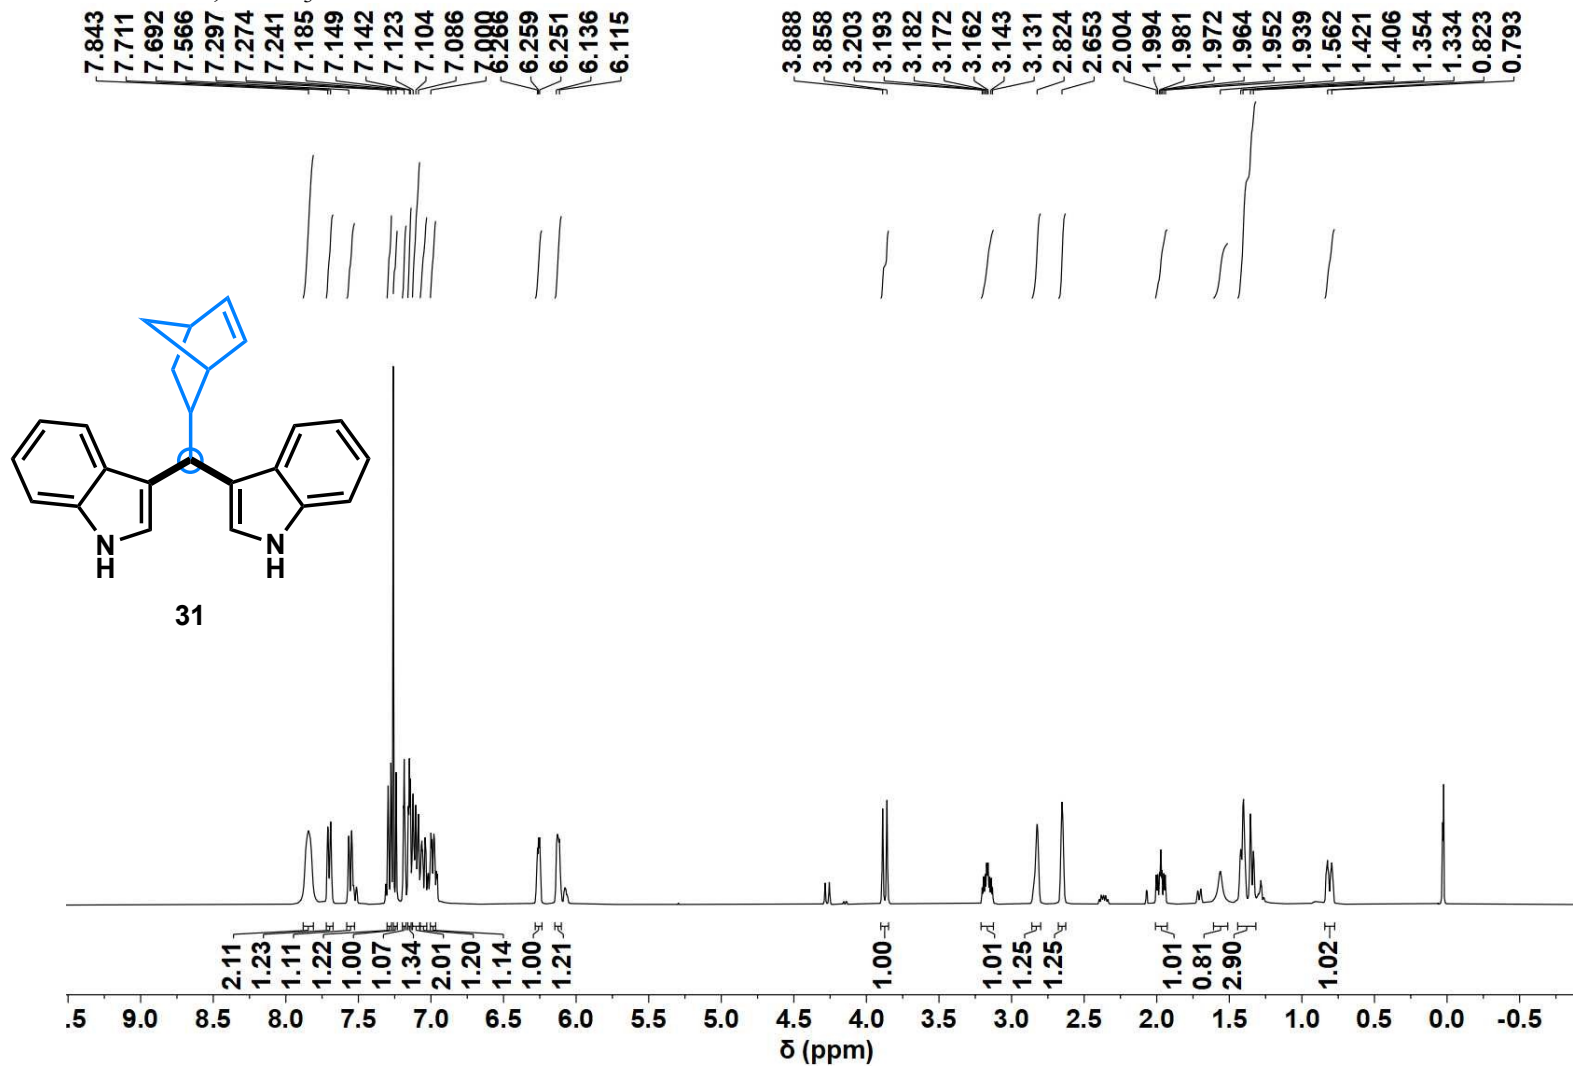

$^{13}\text{C}$  NMR 101 MHz,  $\text{CDCl}_3$

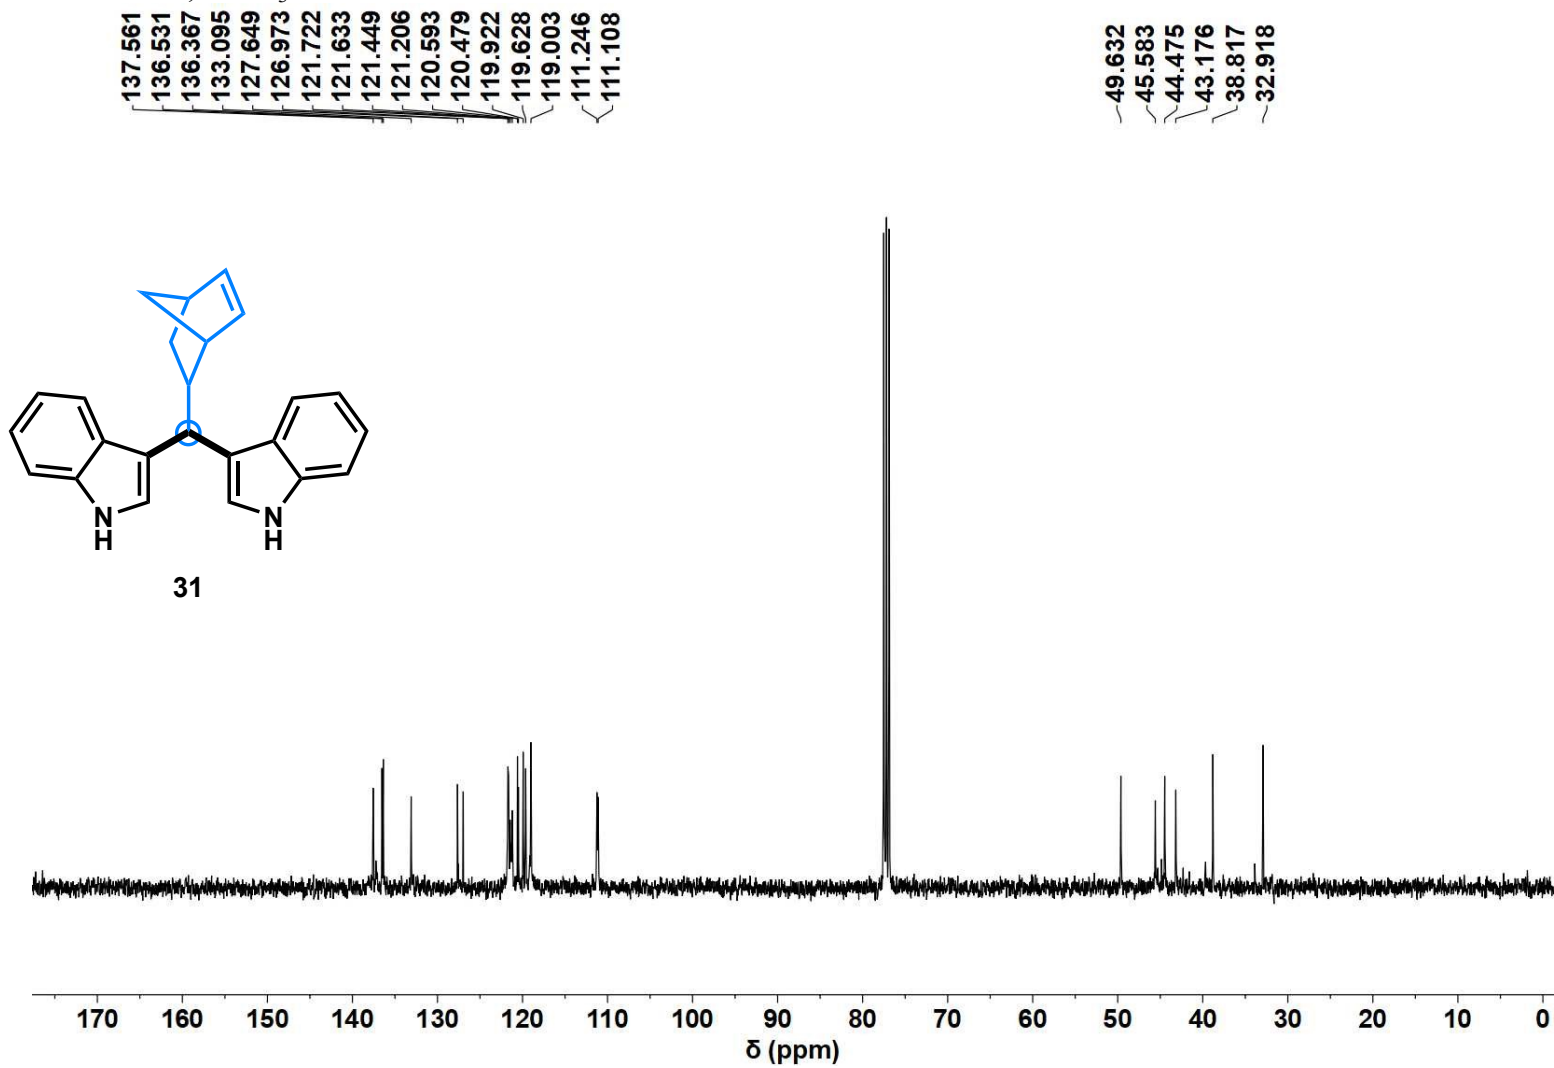

$^1\text{H}$  NMR 400 MHz,  $\text{DMSO-}d_6$

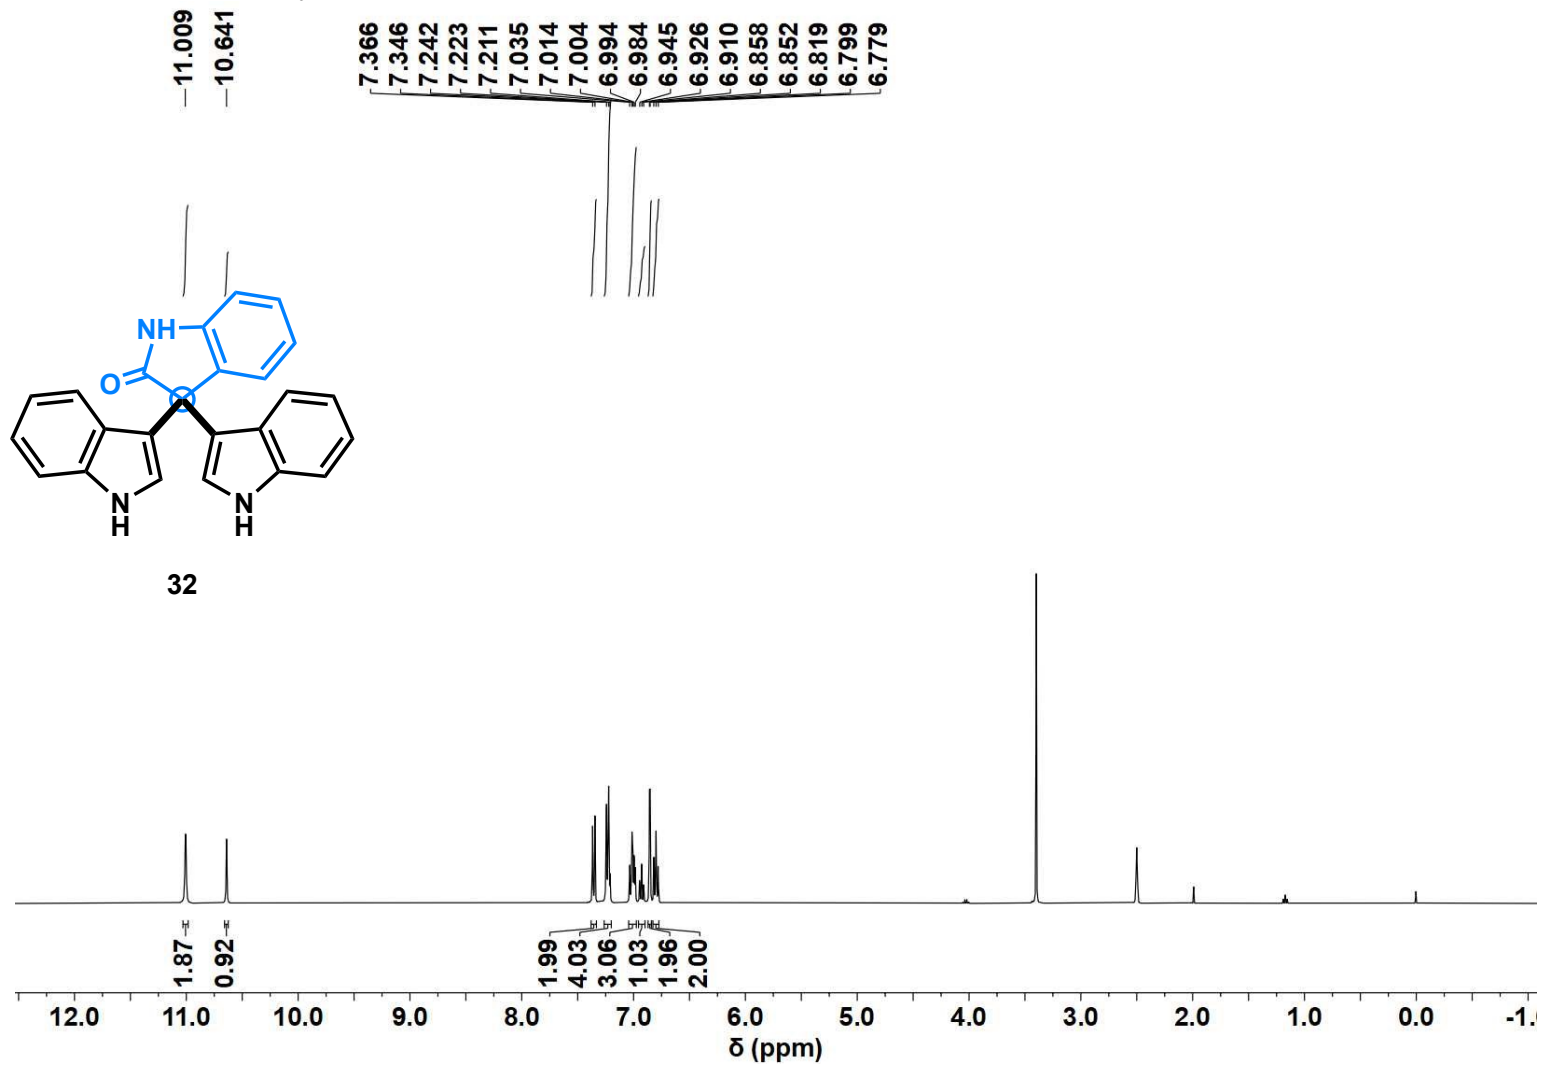



$^{13}\text{C}$  NMR 101 MHz,  $\text{DMSO-}d_6$

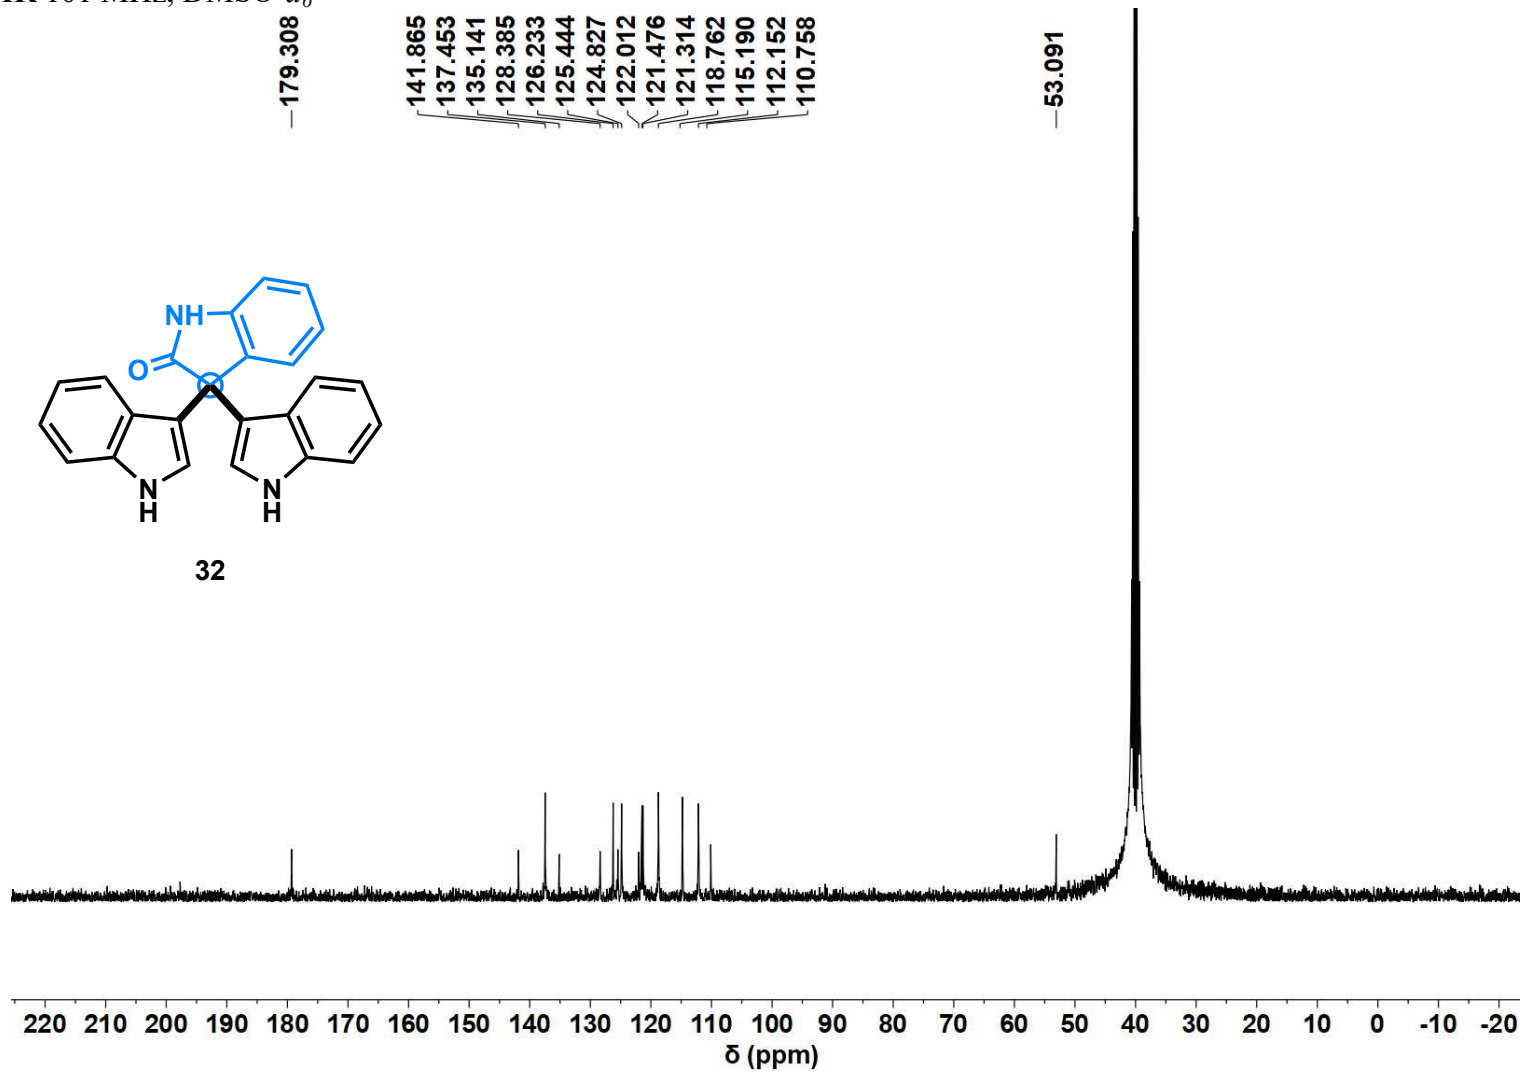

$^1\text{H}$  NMR 400 MHz,  $\text{DMSO-}d_6$

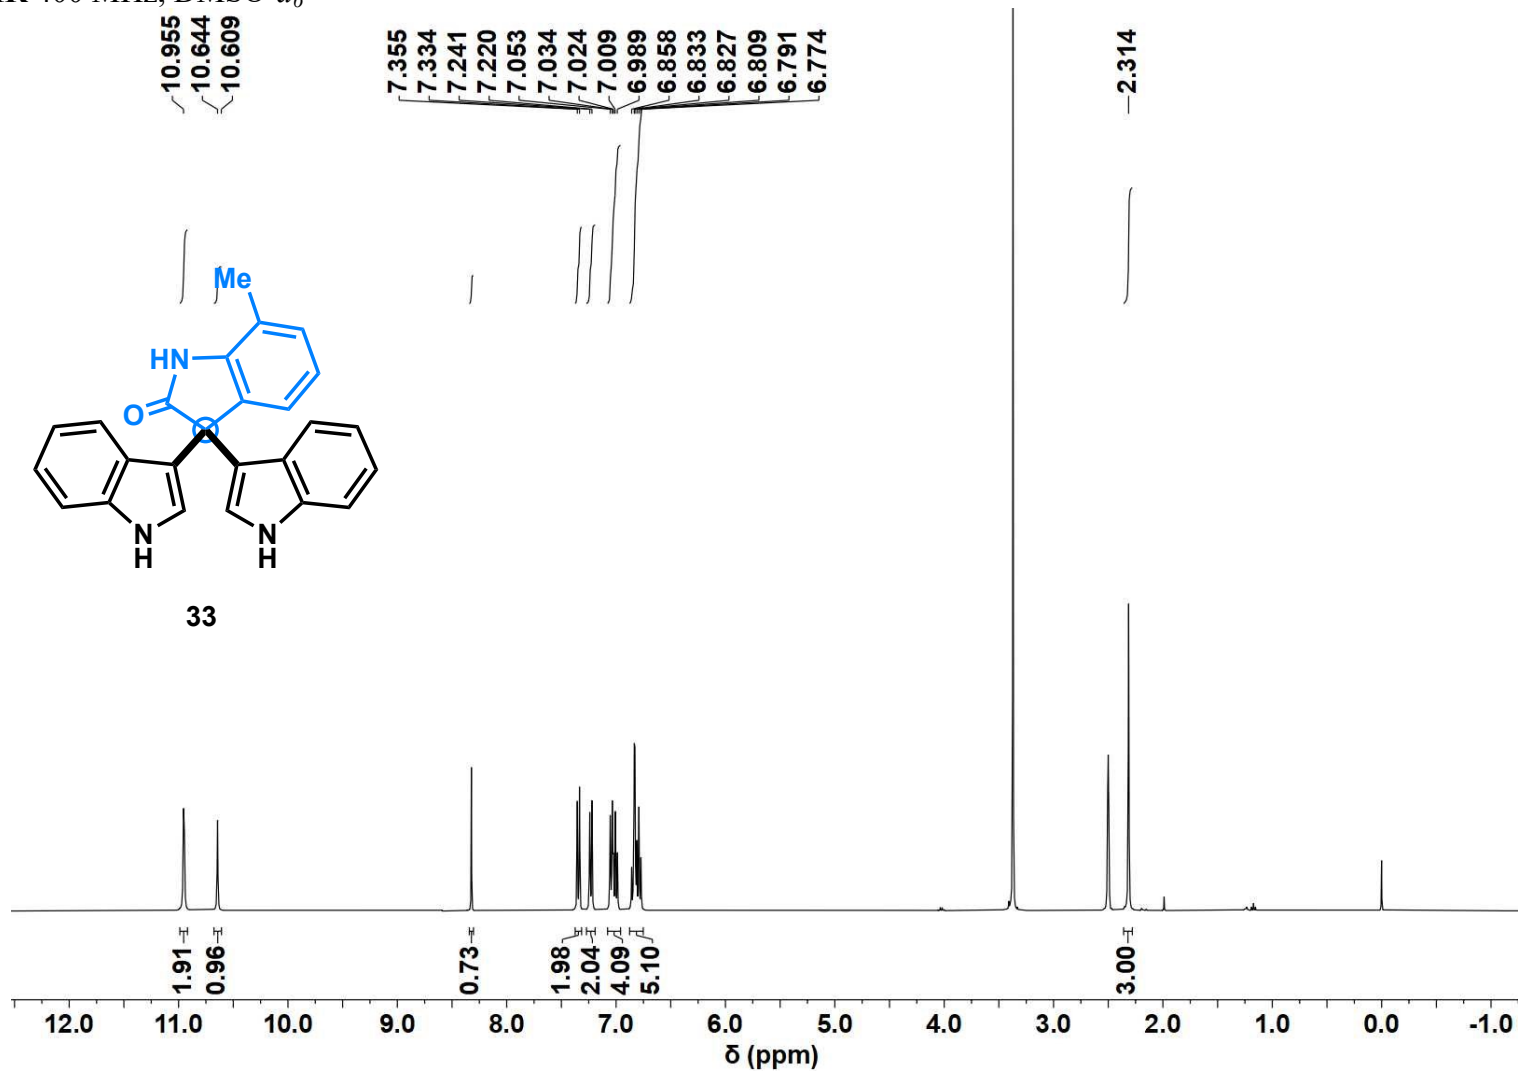

$^{13}\text{C}$  NMR 101 MHz,  $\text{DMSO-}d_6$

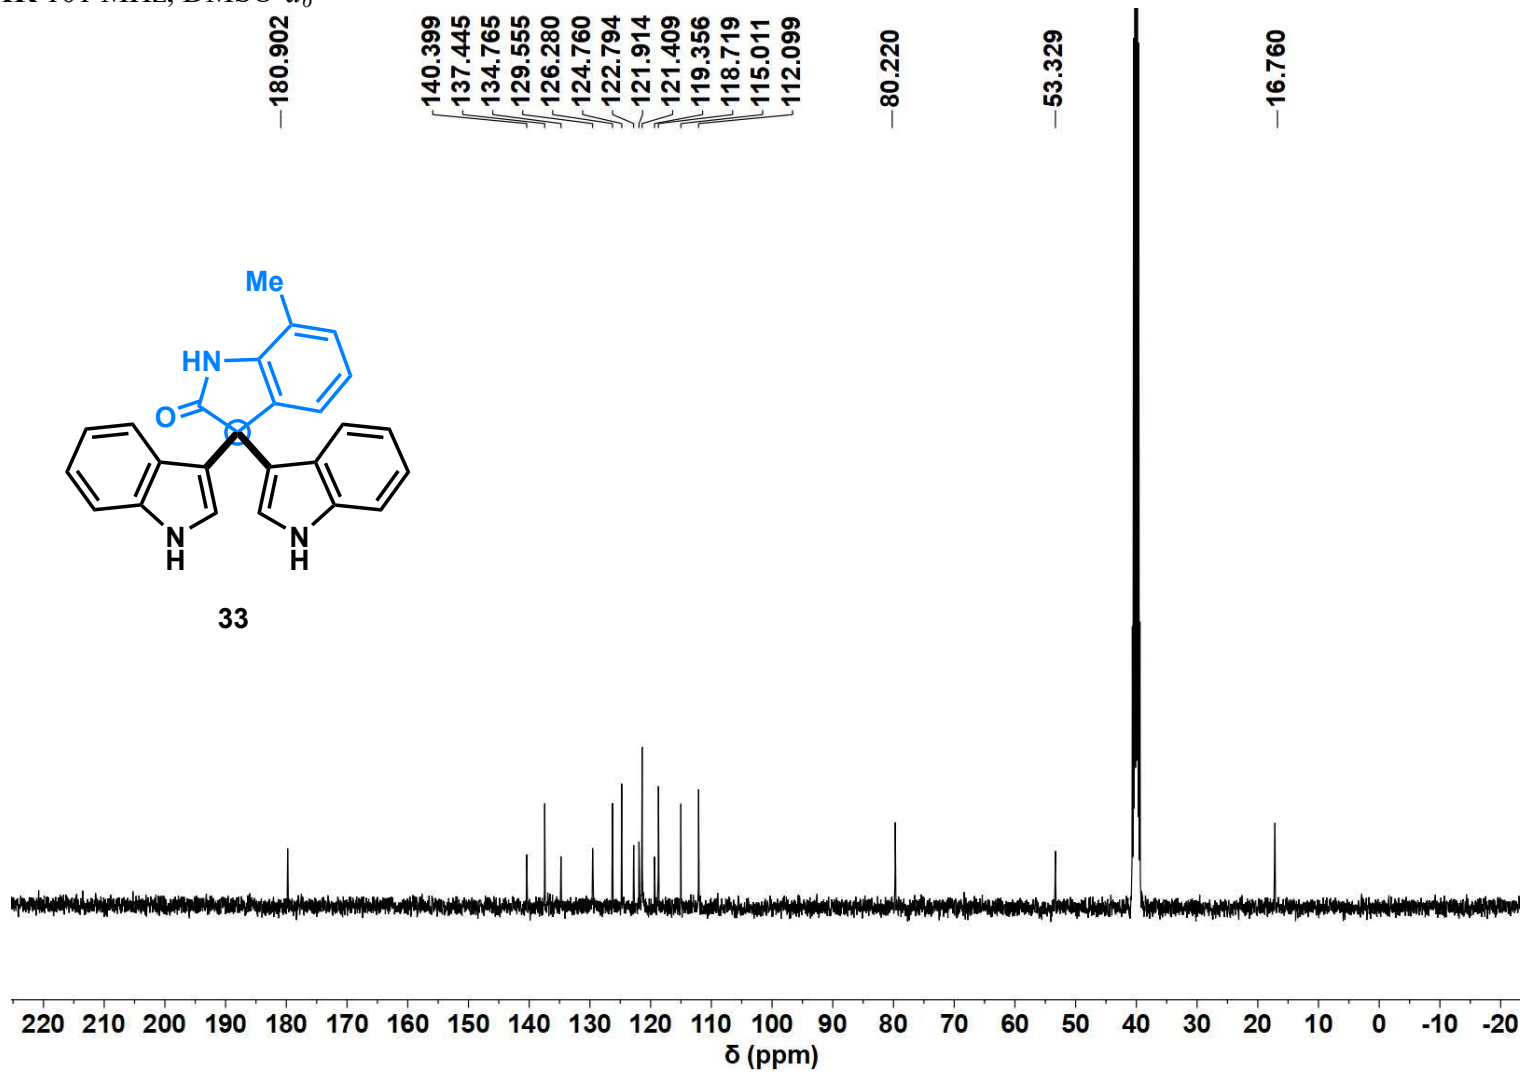

$^1\text{H}$  NMR 400 MHz,  $\text{DMSO-}d_6$

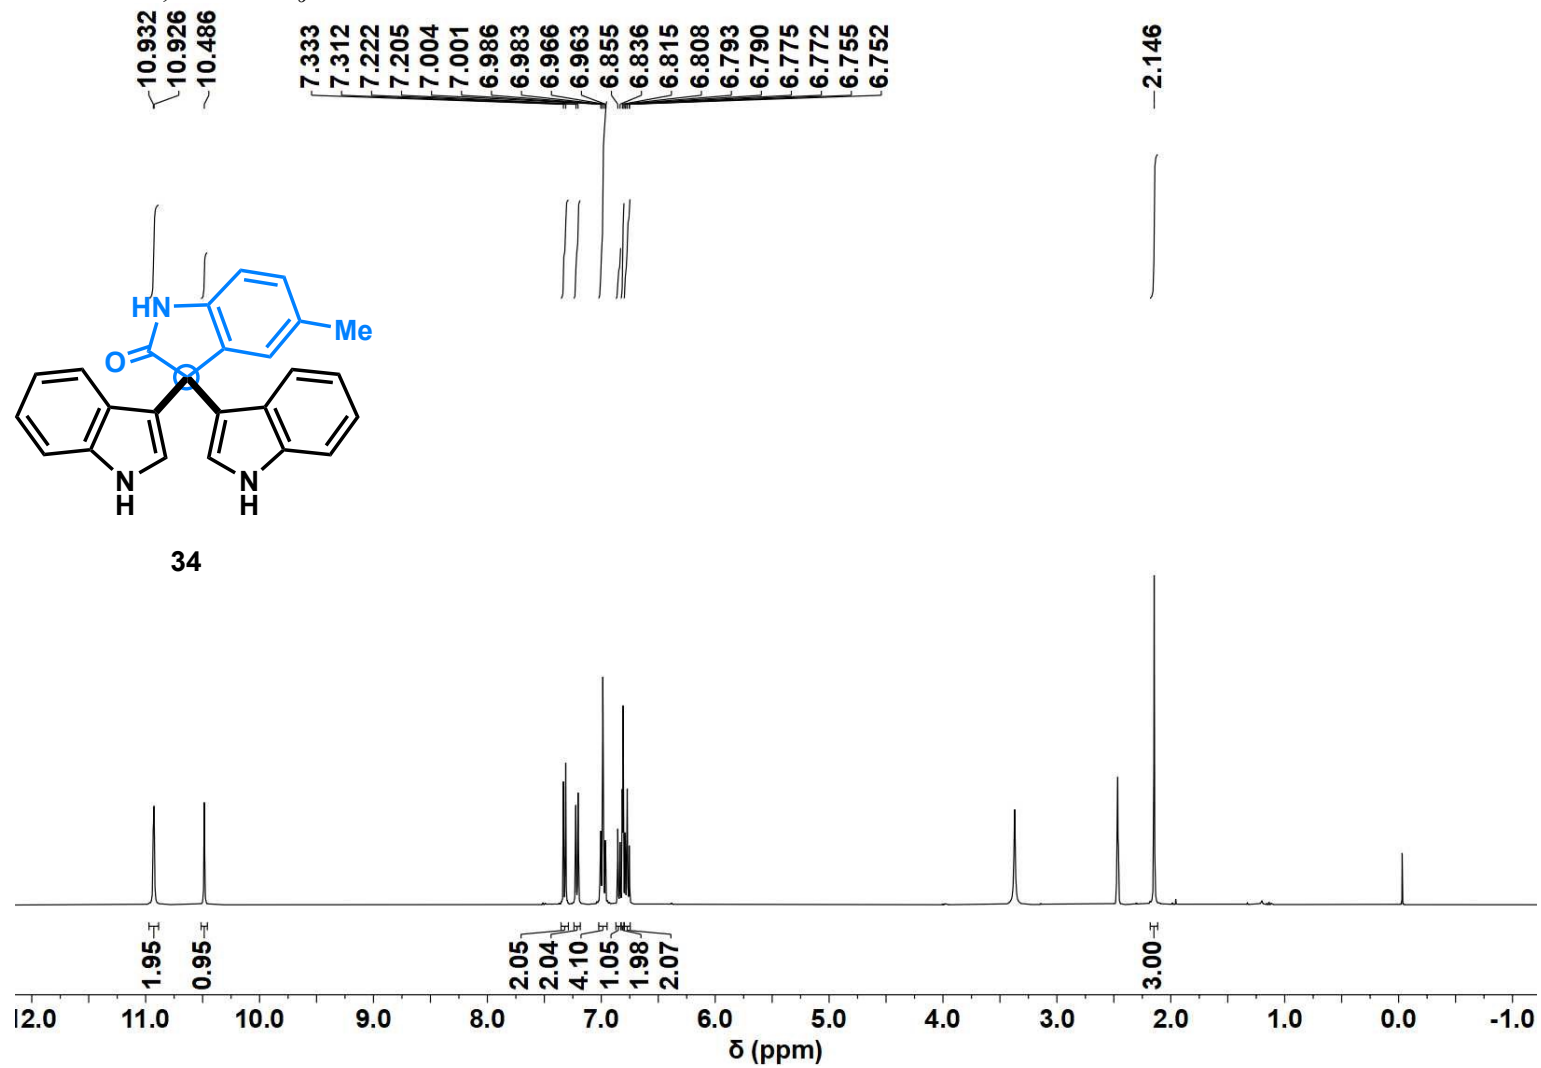

$^{13}\text{C}$  NMR 101 MHz,  $\text{DMSO-}d_6$

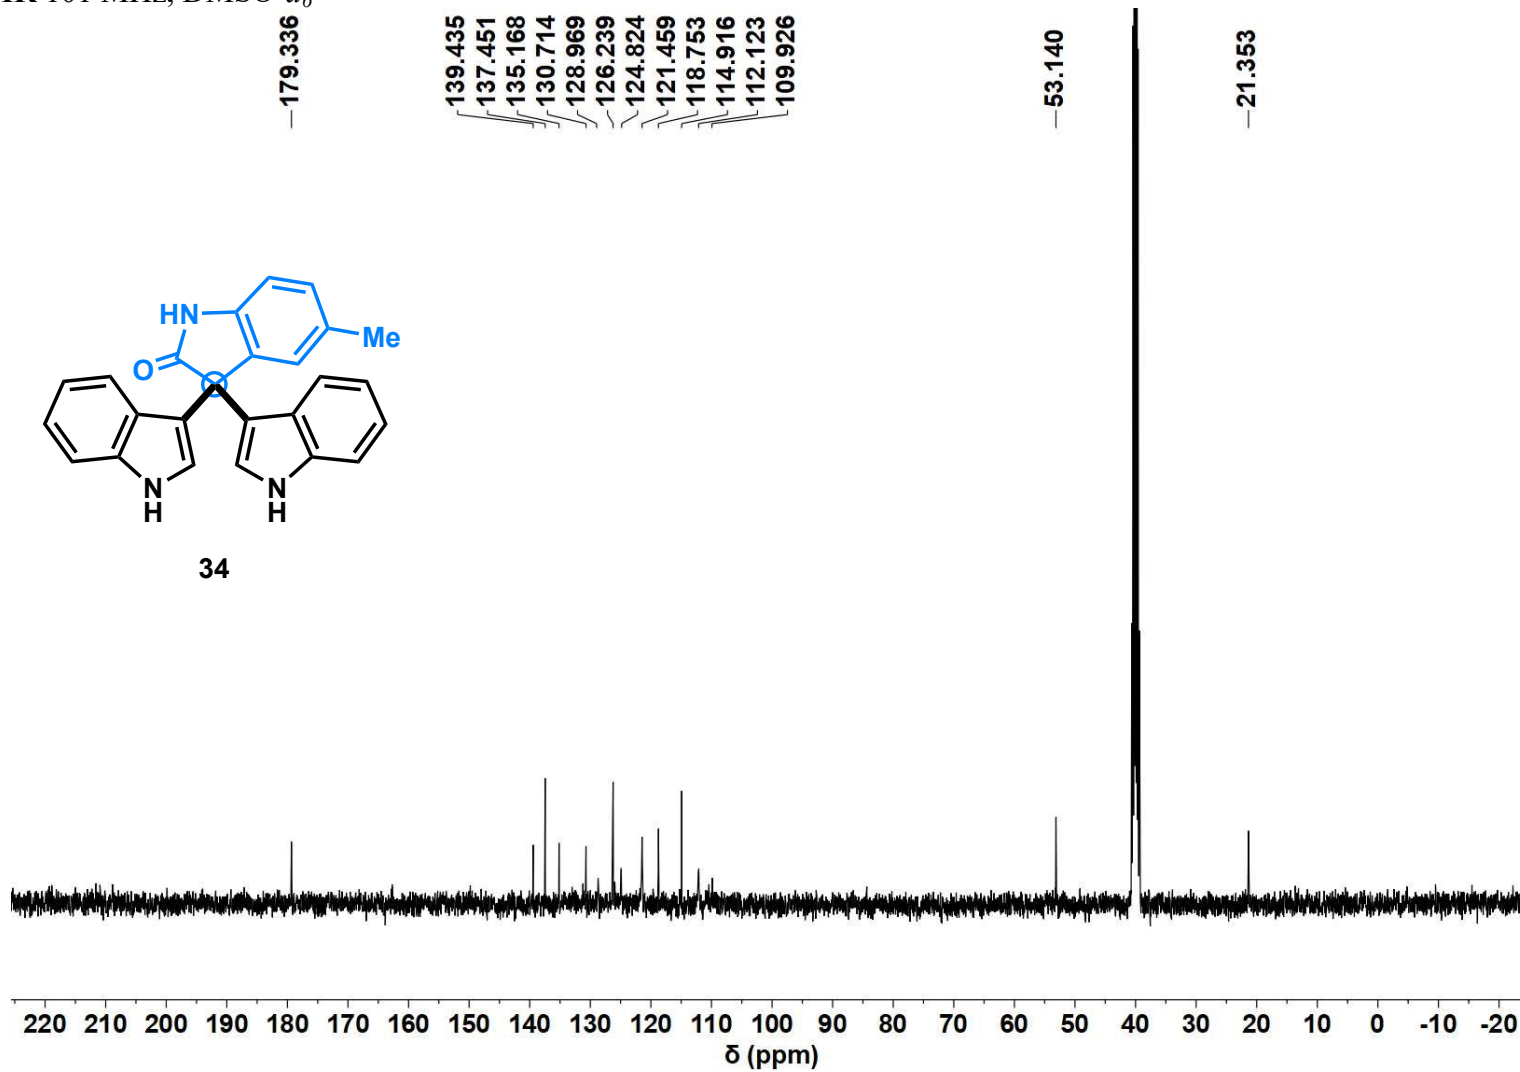

$^1\text{H}$  NMR 400 MHz,  $\text{DMSO-}d_6$

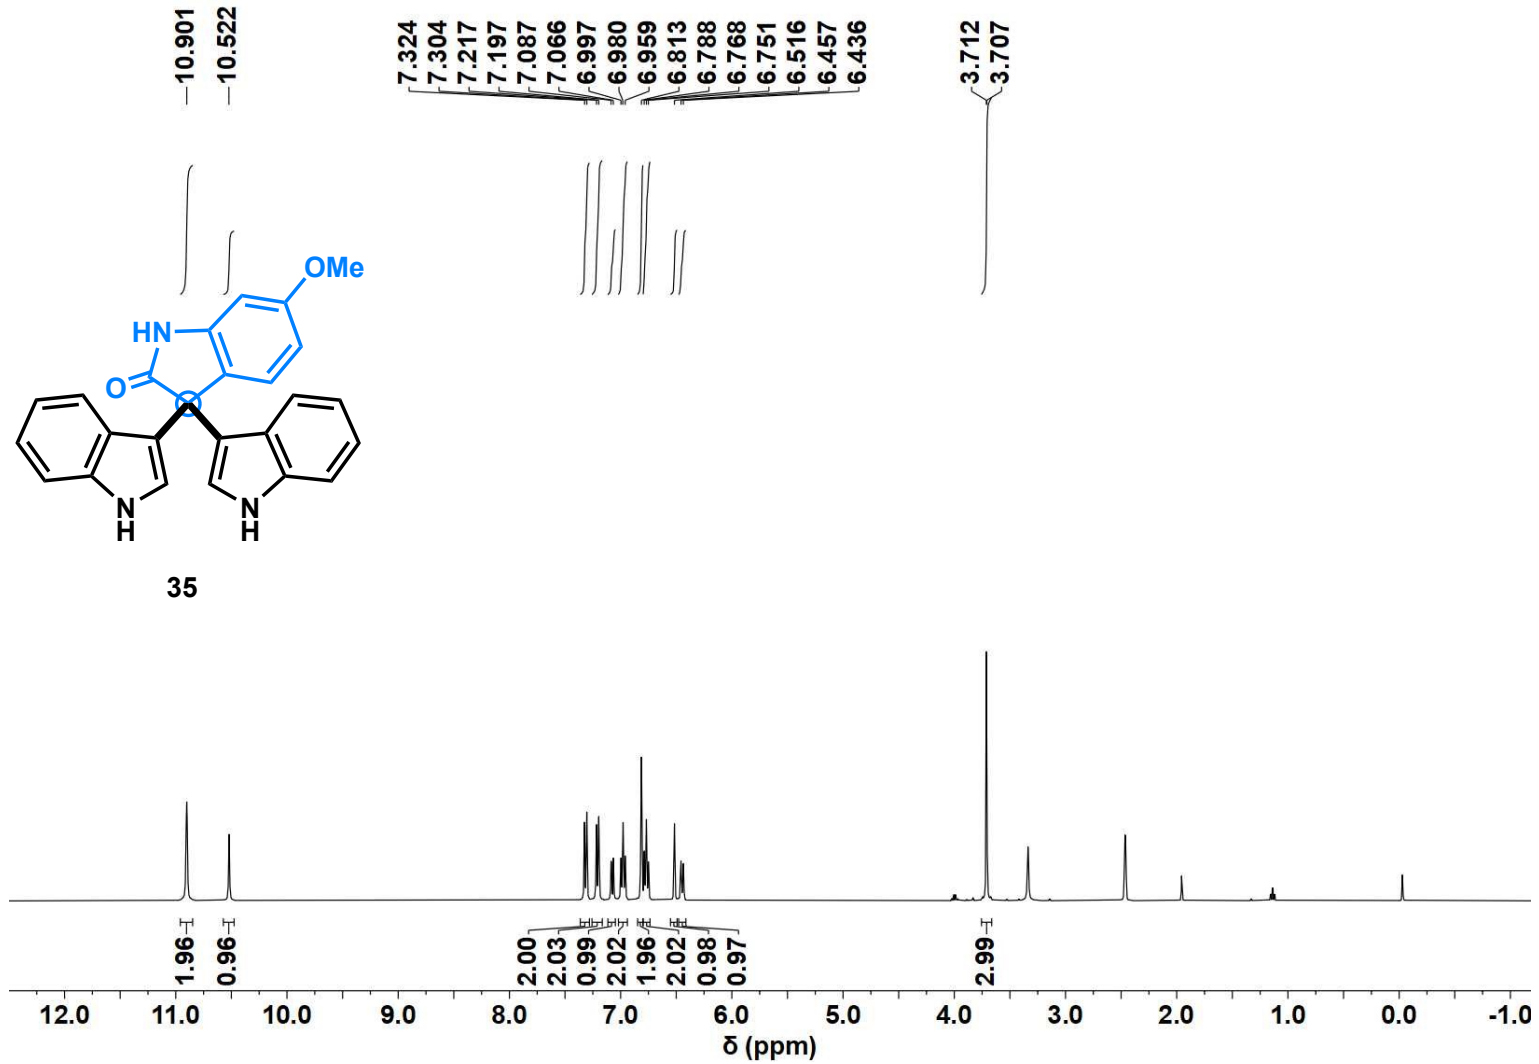

$^{13}\text{C}$  NMR 101 MHz,  $\text{DMSO-}d_6$

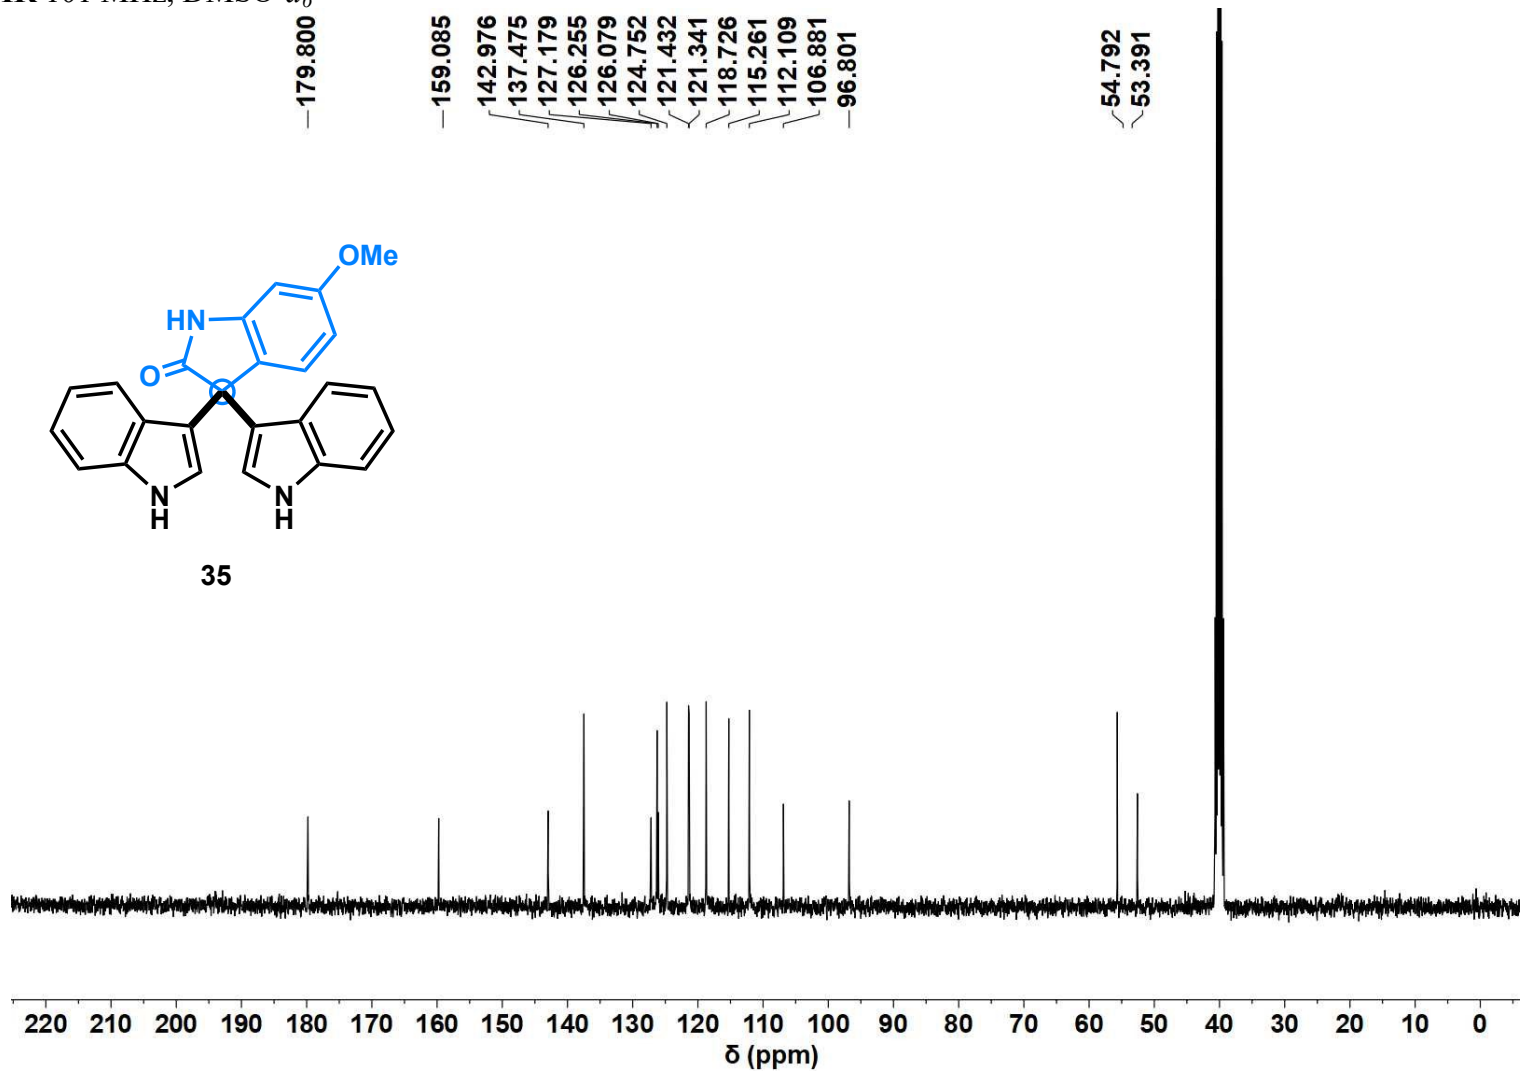

$^1\text{H}$  NMR 400 MHz,  $\text{DMSO-}d_6$

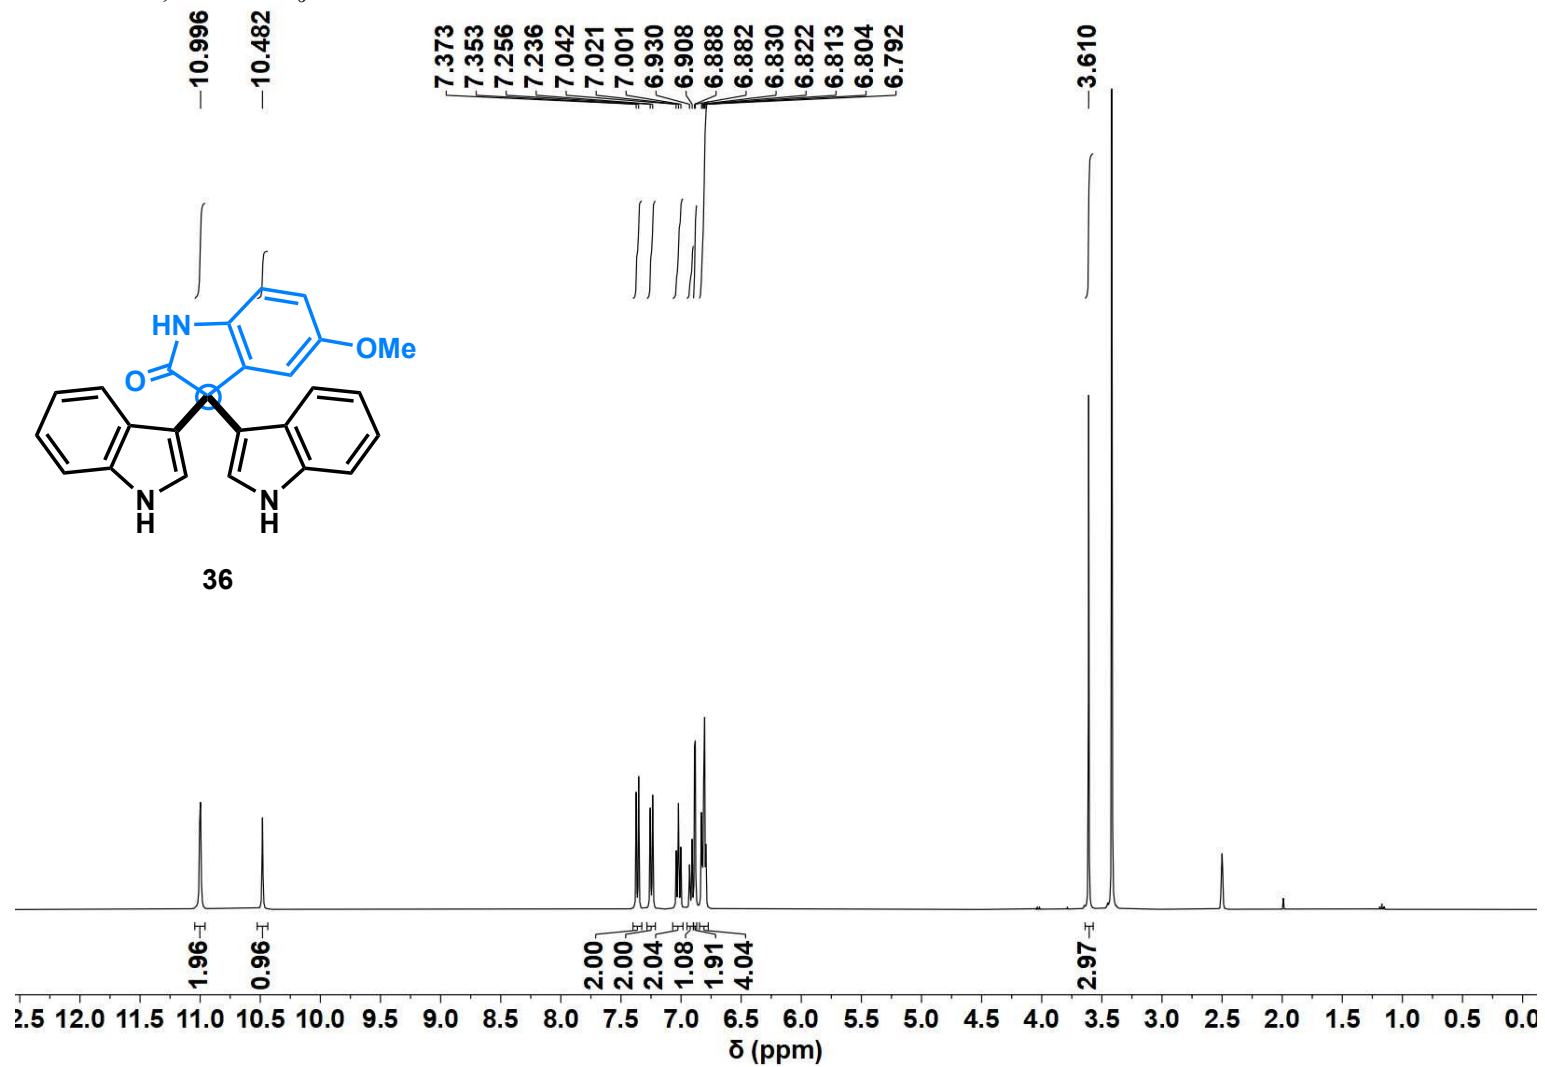



$^{13}\text{C}$  NMR 101 MHz,  $\text{DMSO-}d_6$

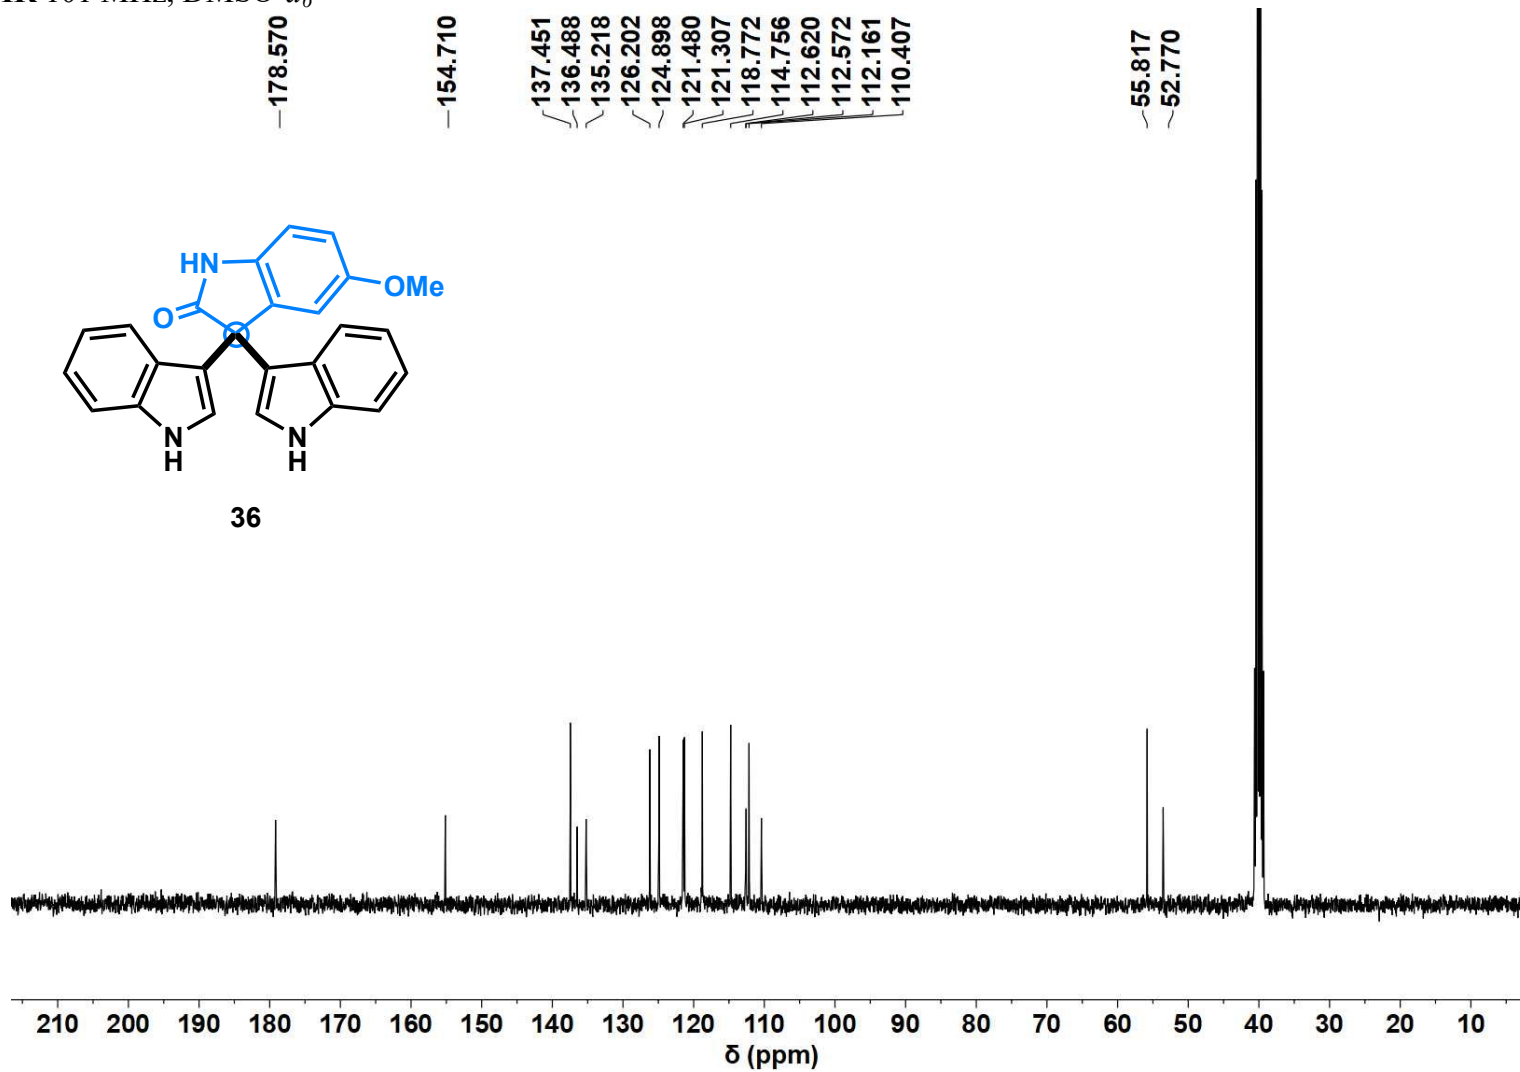

$^1\text{H}$  NMR 400 MHz,  $\text{DMSO-}d_6$

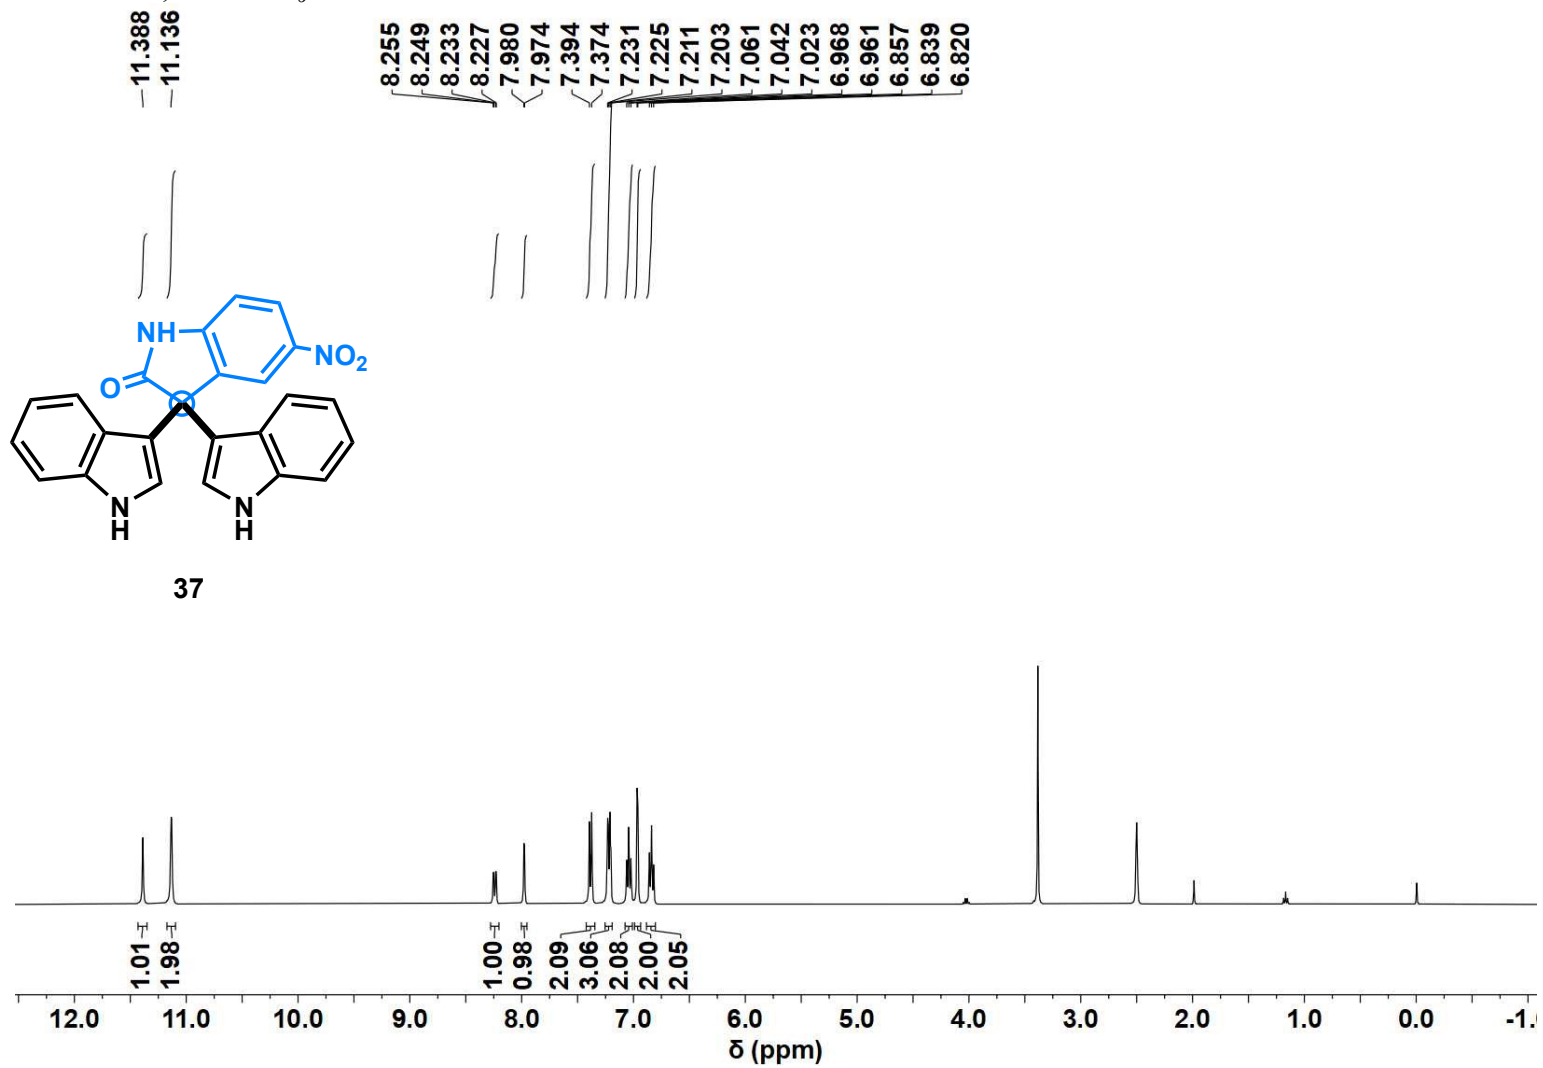

$^{13}\text{C}$  NMR 101 MHz,  $\text{DMSO-}d_6$

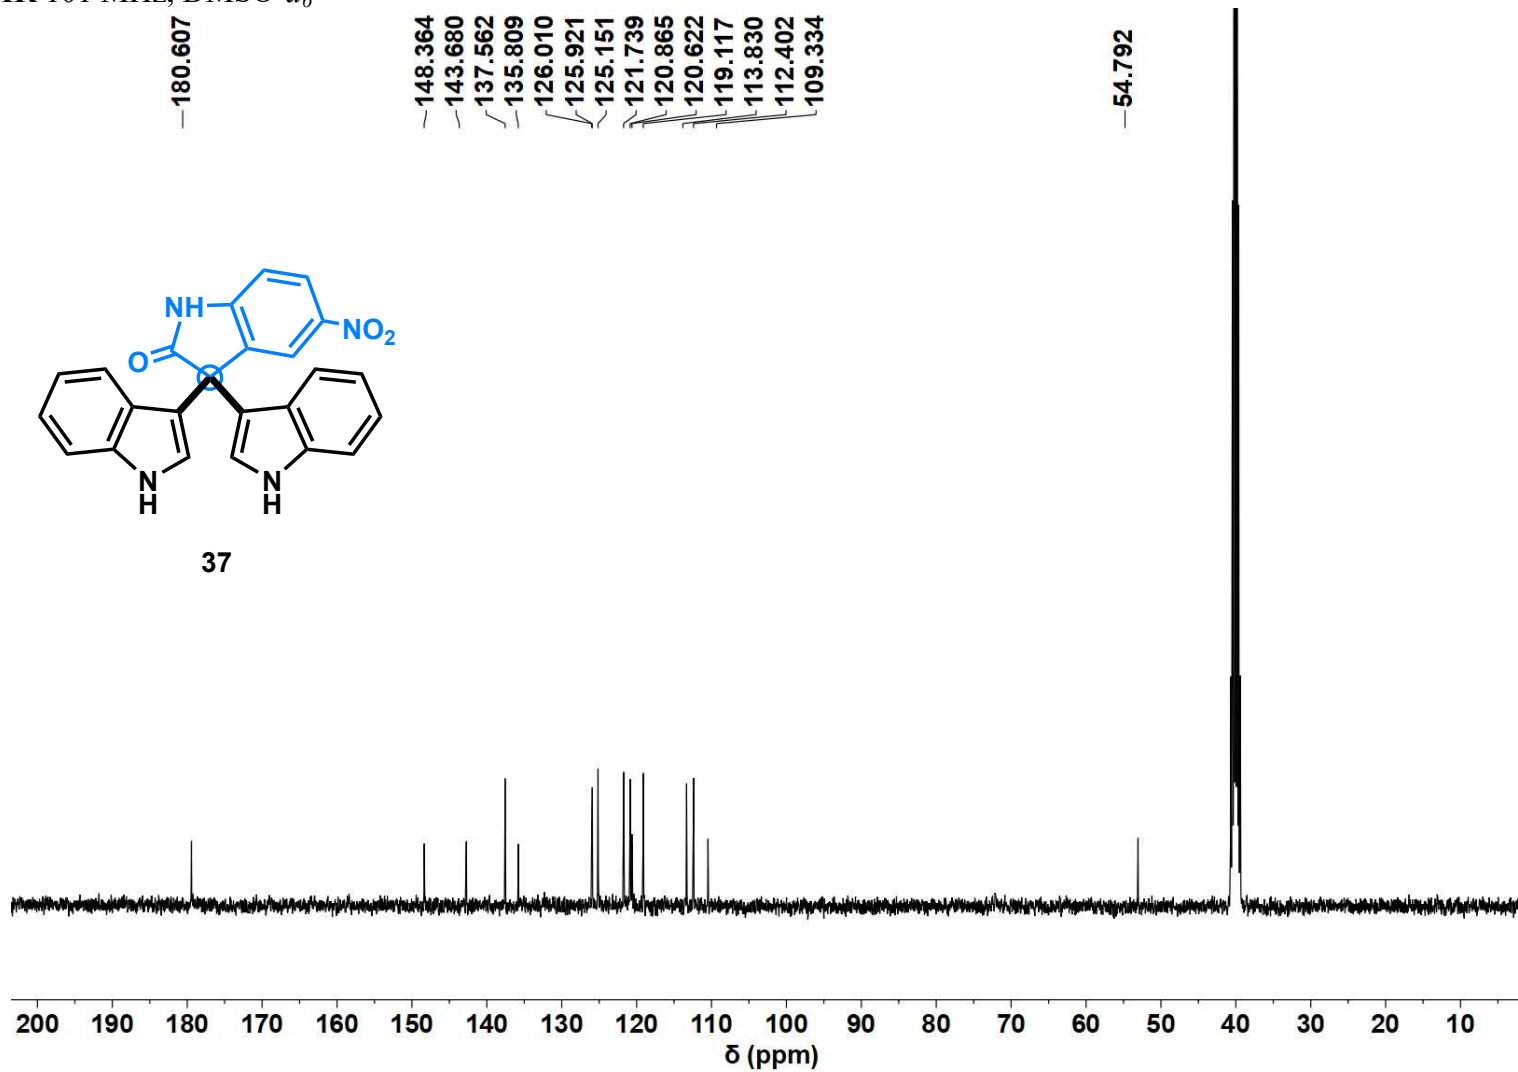

$^1\text{H}$  NMR 400 MHz,  $\text{DMSO-}d_6$

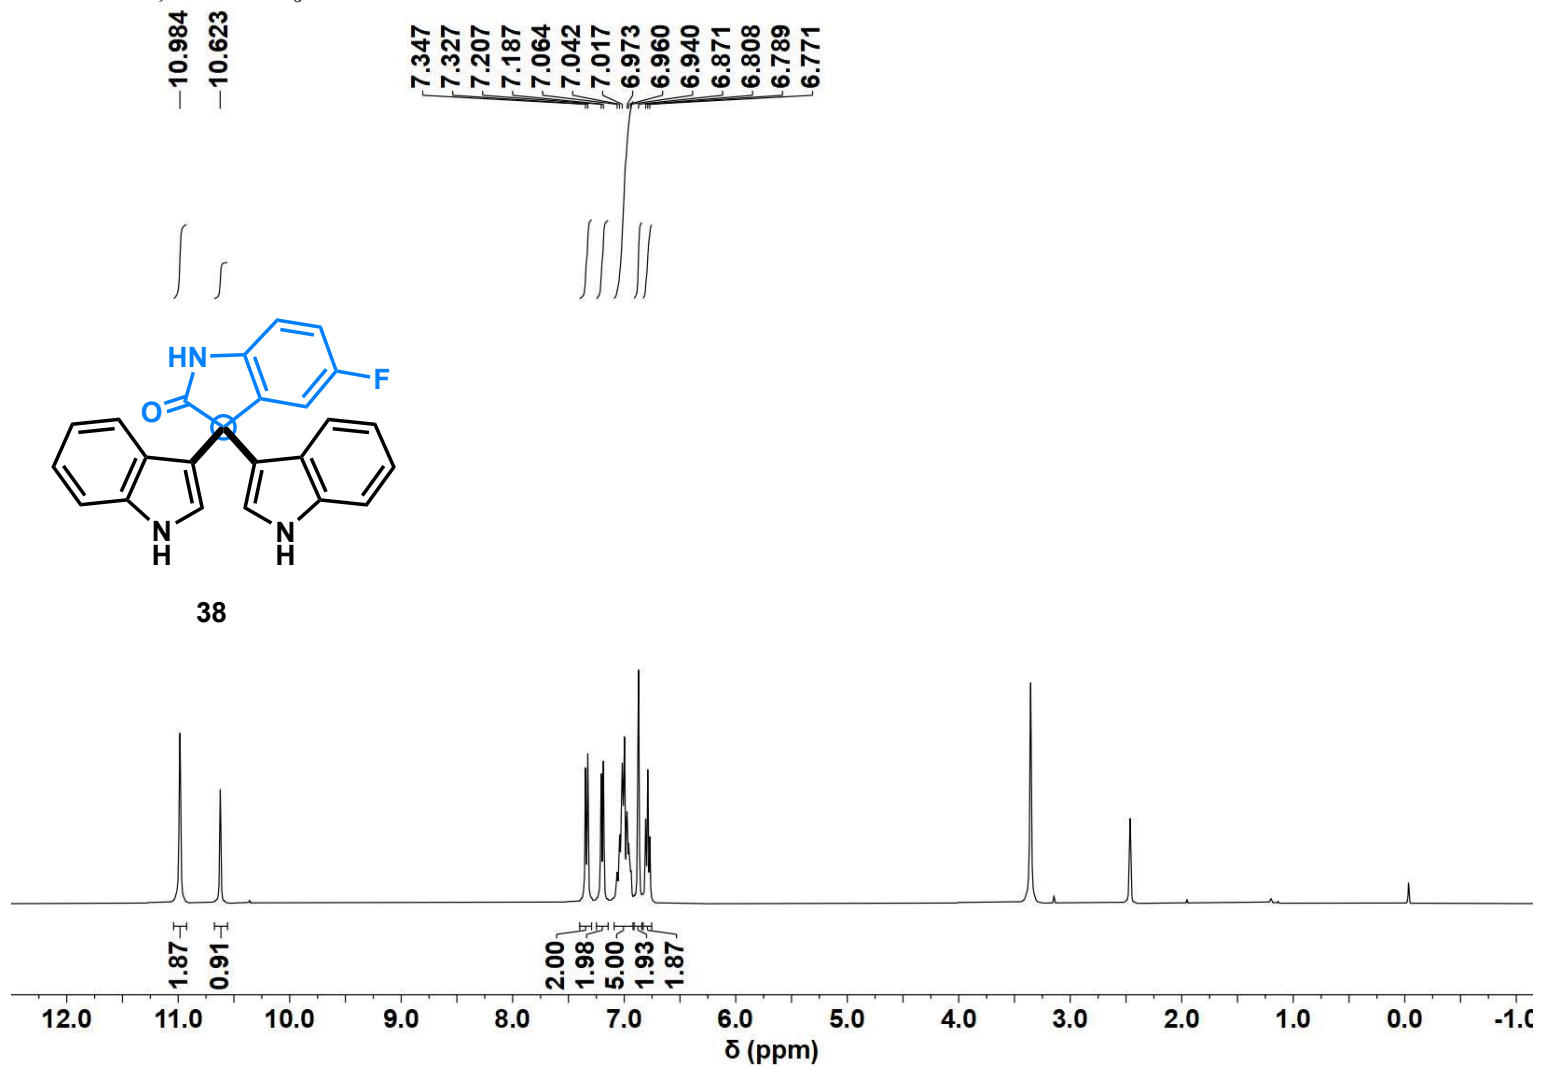

$^{13}\text{C}$  NMR 101 MHz,  $\text{DMSO-}d_6$

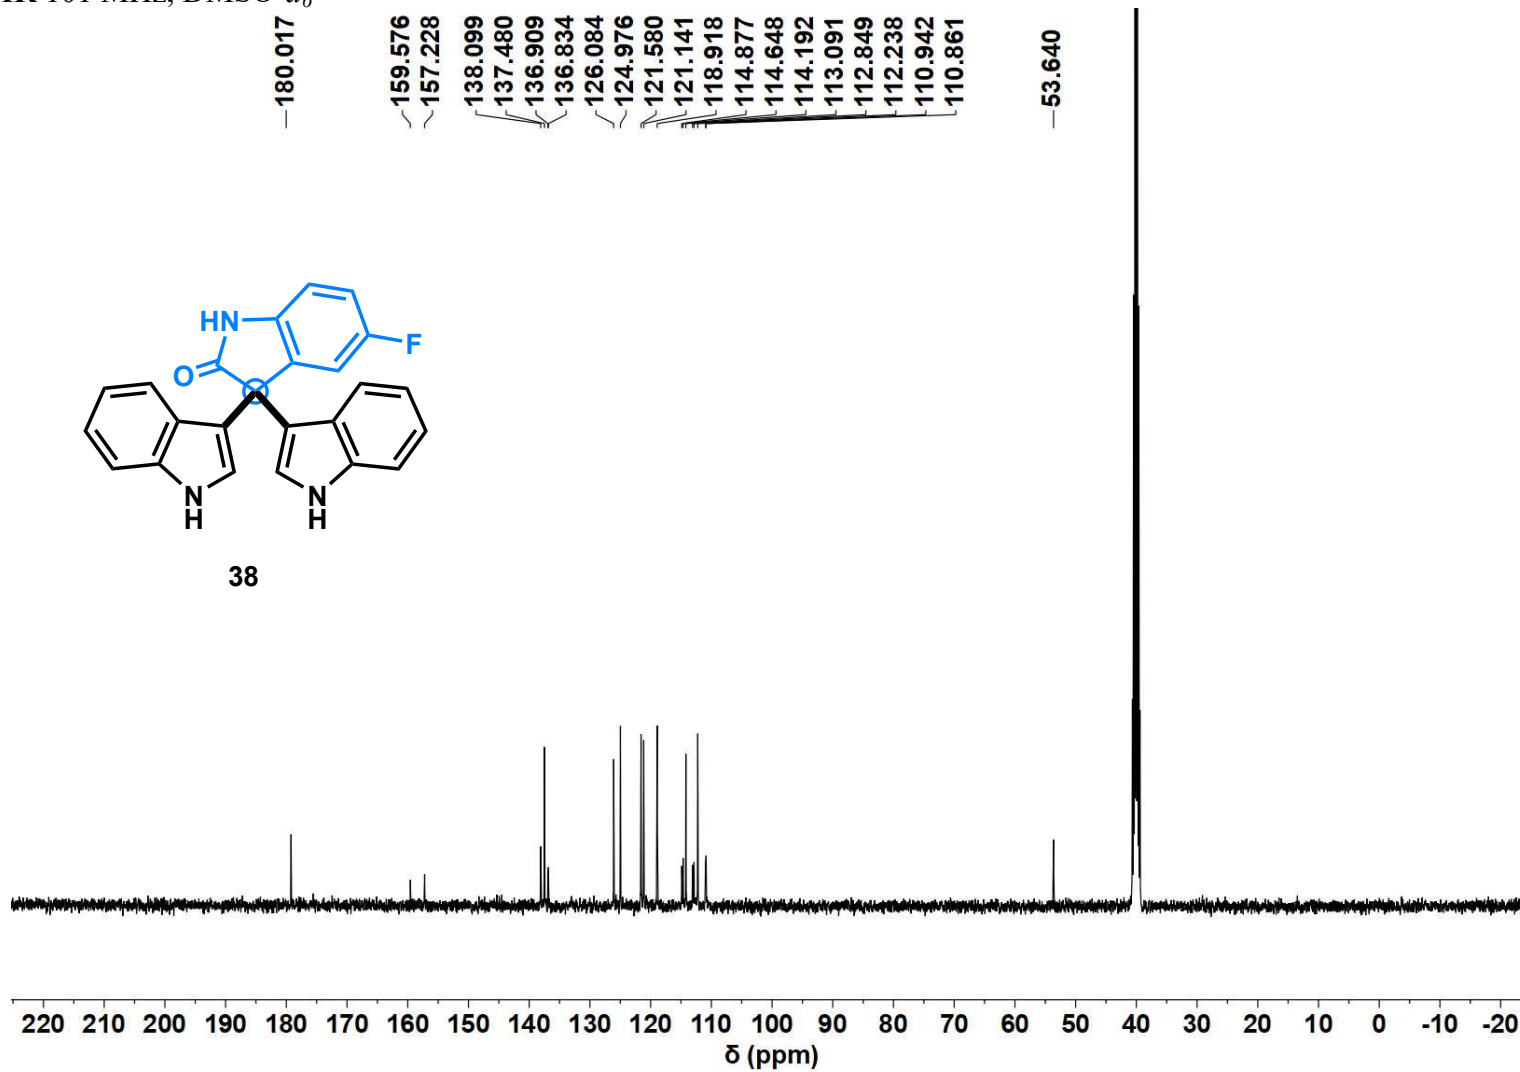

$^{19}\text{F}$  NMR 376 MHz,  $\text{DMSO-}d_6$

-121.417  
-121.428  
-121.440  
-121.452  
-121.464  
-121.476

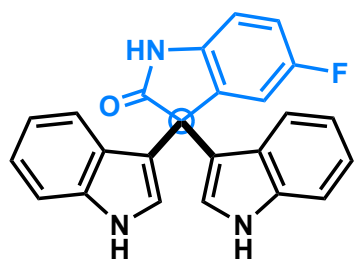

38

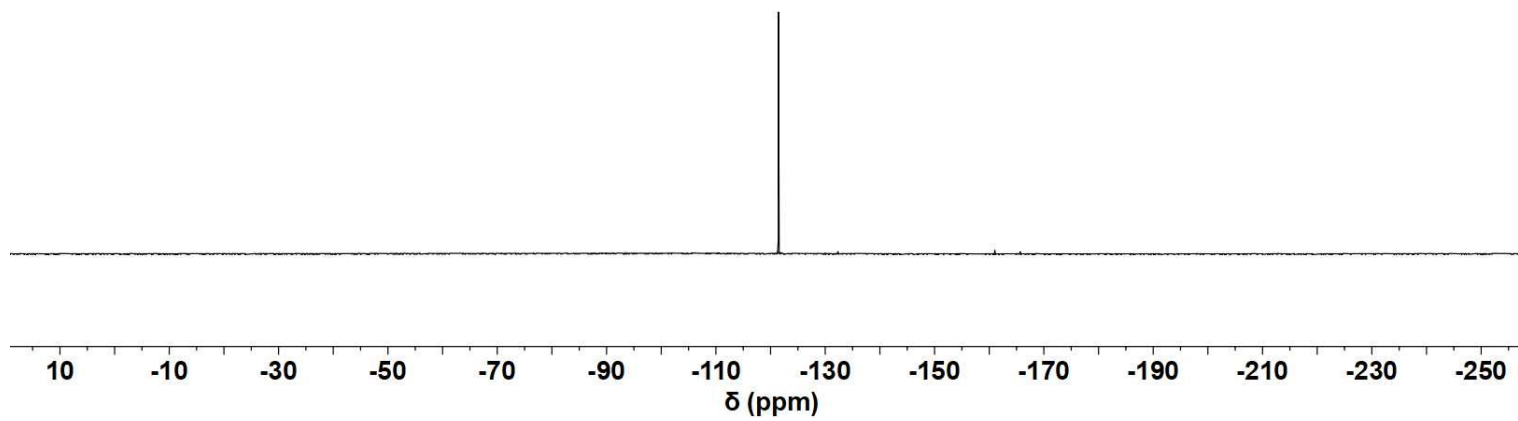

S142

$^1\text{H}$  NMR 400 MHz,  $\text{DMSO-}d_6$

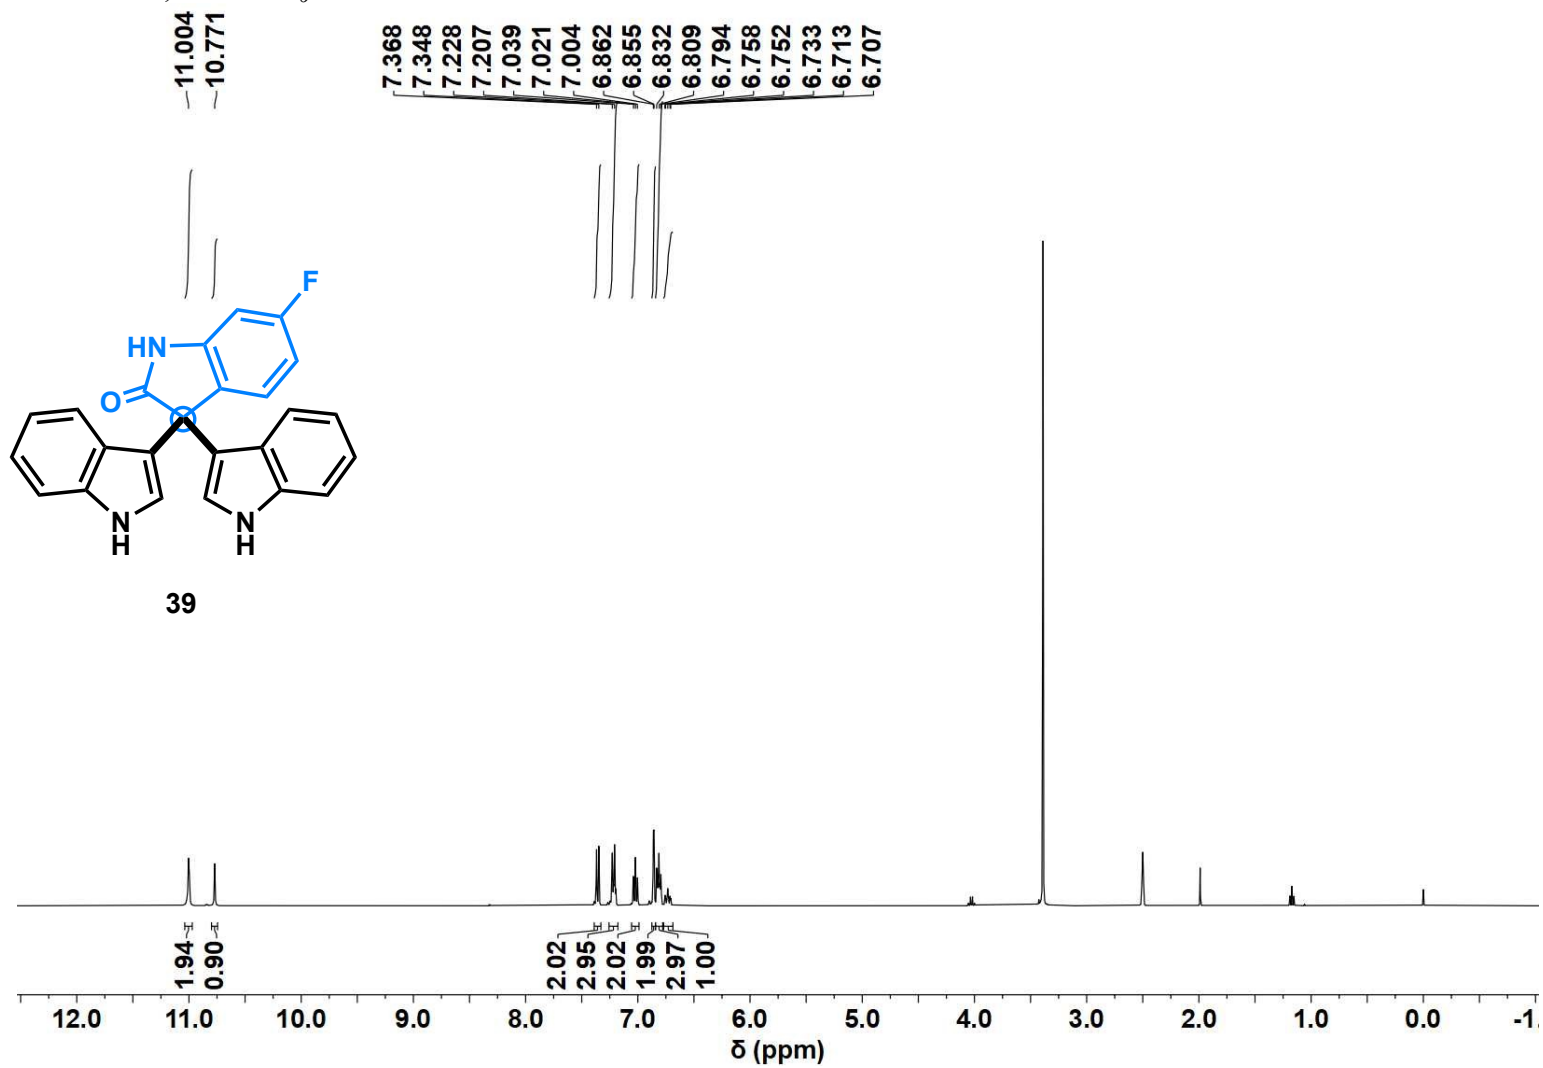

$^{13}\text{C}$  NMR 101 MHz,  $\text{DMSO-}d_6$

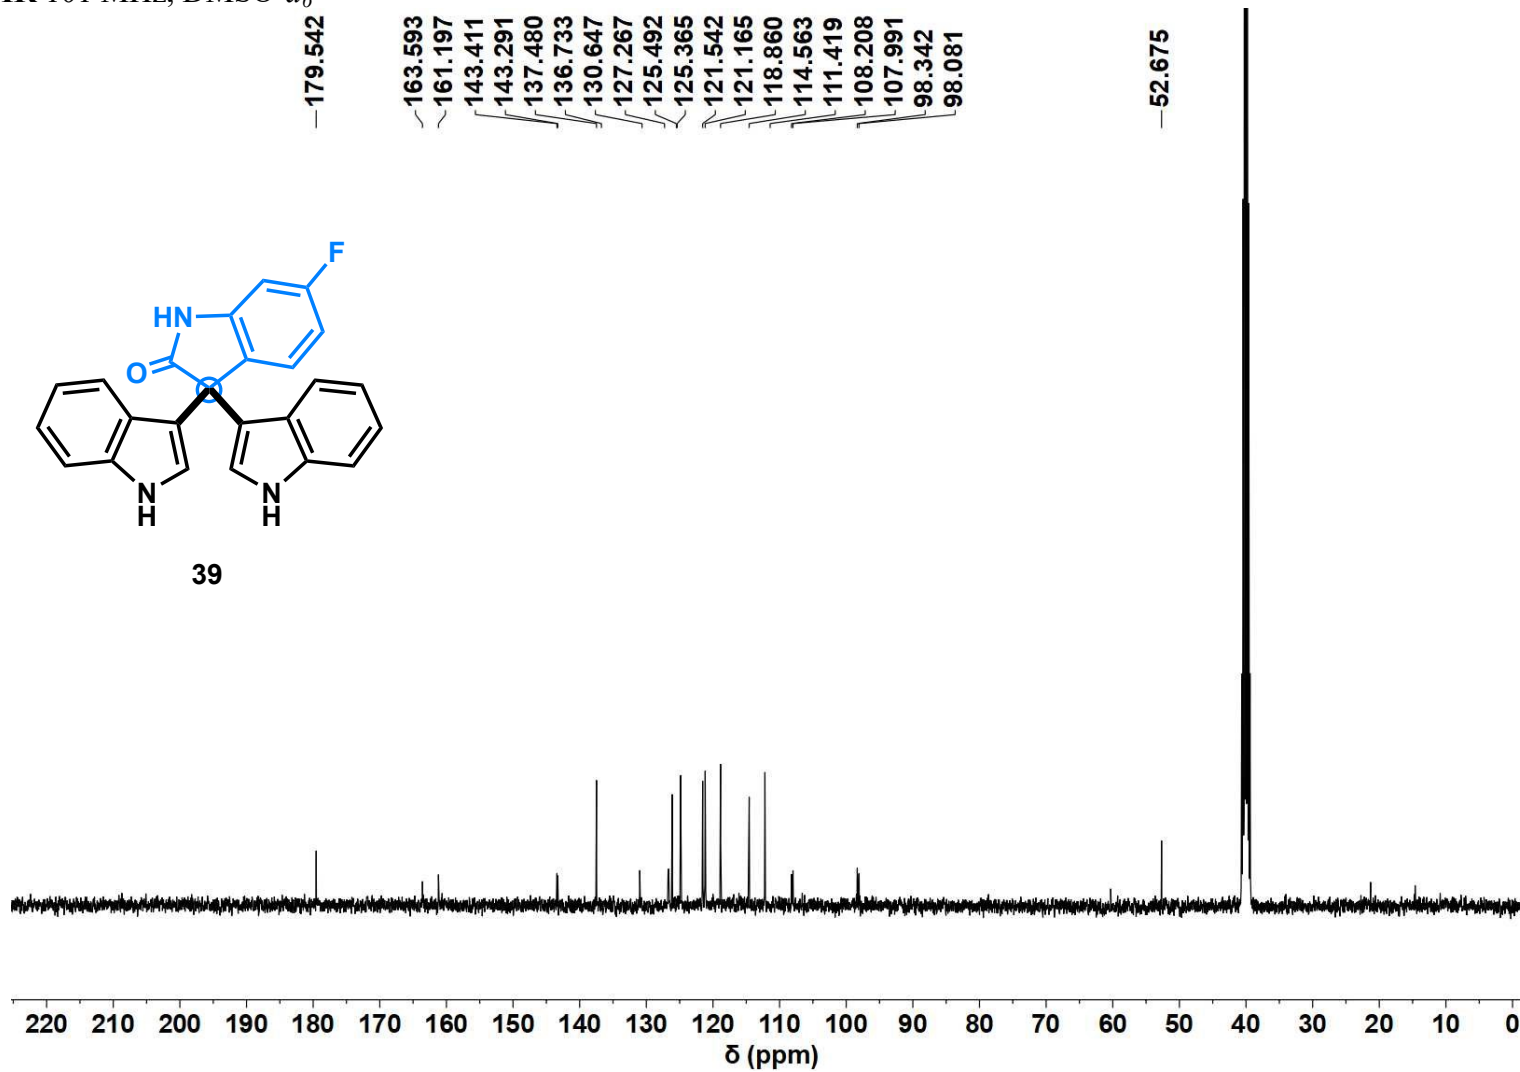



$^{19}\text{F}$  NMR 376 MHz,  $\text{DMSO-}d_6$

-113.246  
-113.271  
-113.285  
-113.297  
-113.310

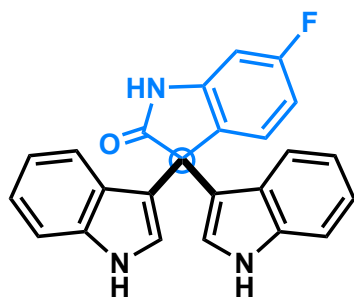

39

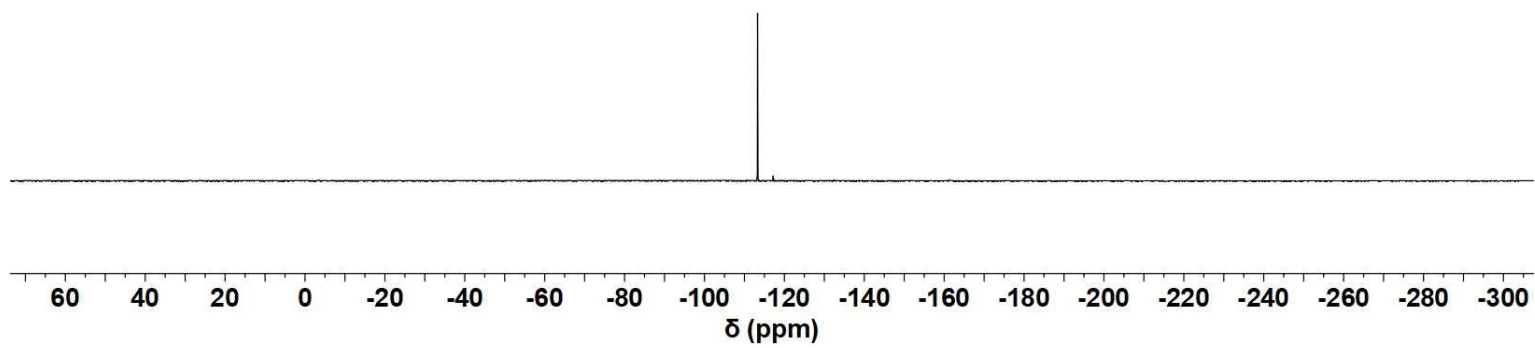

$^1\text{H}$  NMR 400 MHz,  $\text{DMSO-}d_6$

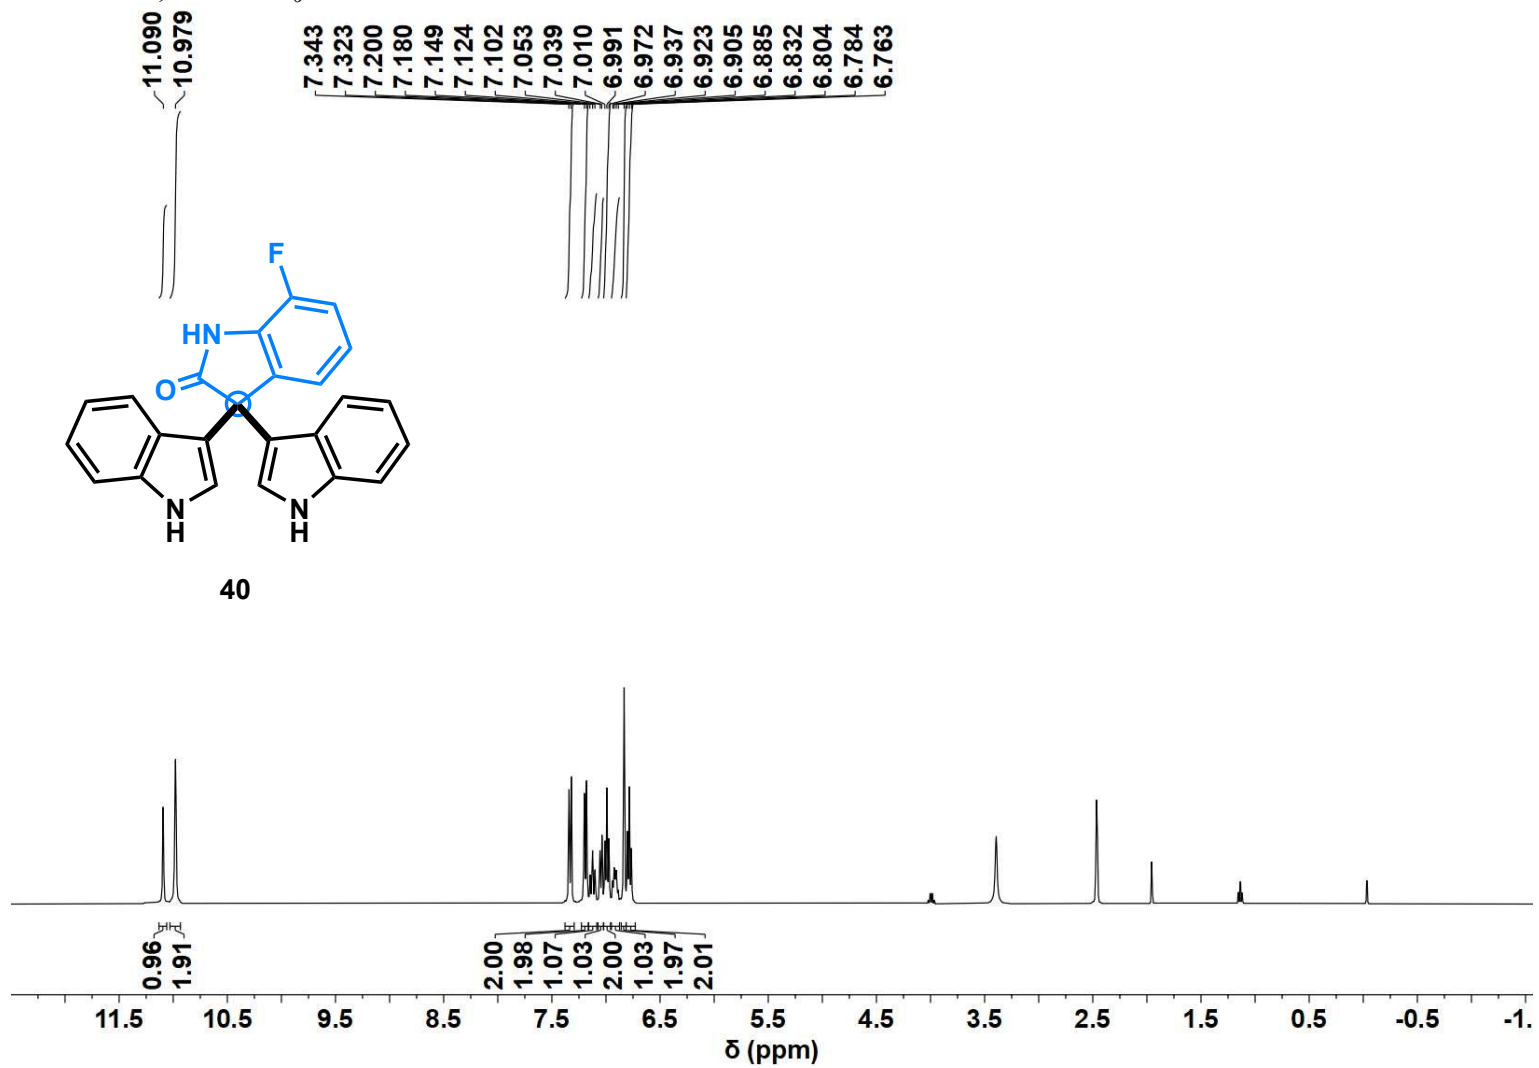

$^{13}\text{C}$  NMR 101 MHz,  $\text{DMSO-}d_6$

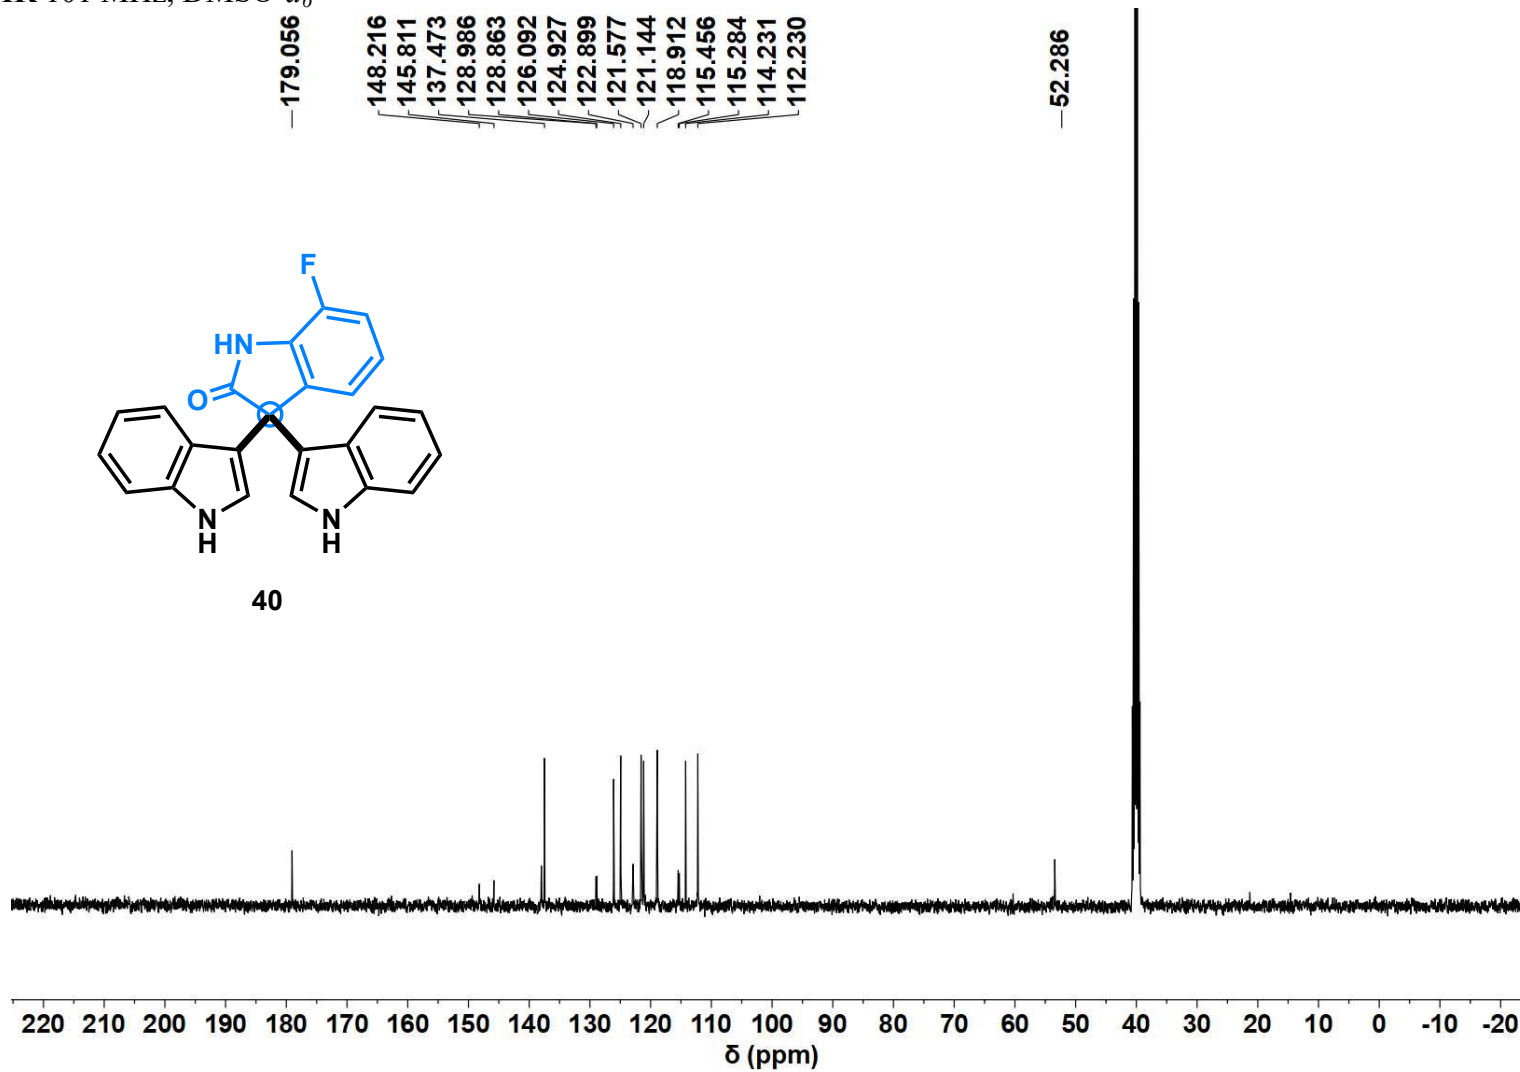

$^{19}\text{F}$  NMR 376 MHz,  $\text{DMSO-}d_6$

-132.475  
-132.487  
-132.502  
-132.515

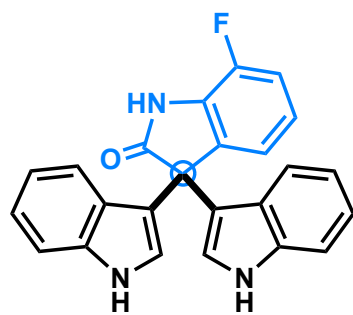

40

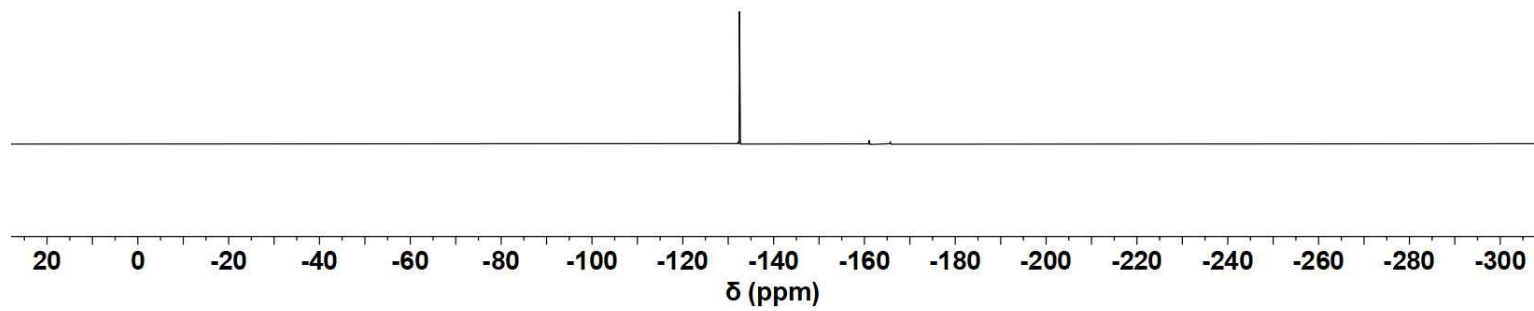

$^1\text{H}$  NMR 400 MHz,  $\text{DMSO-}d_6$

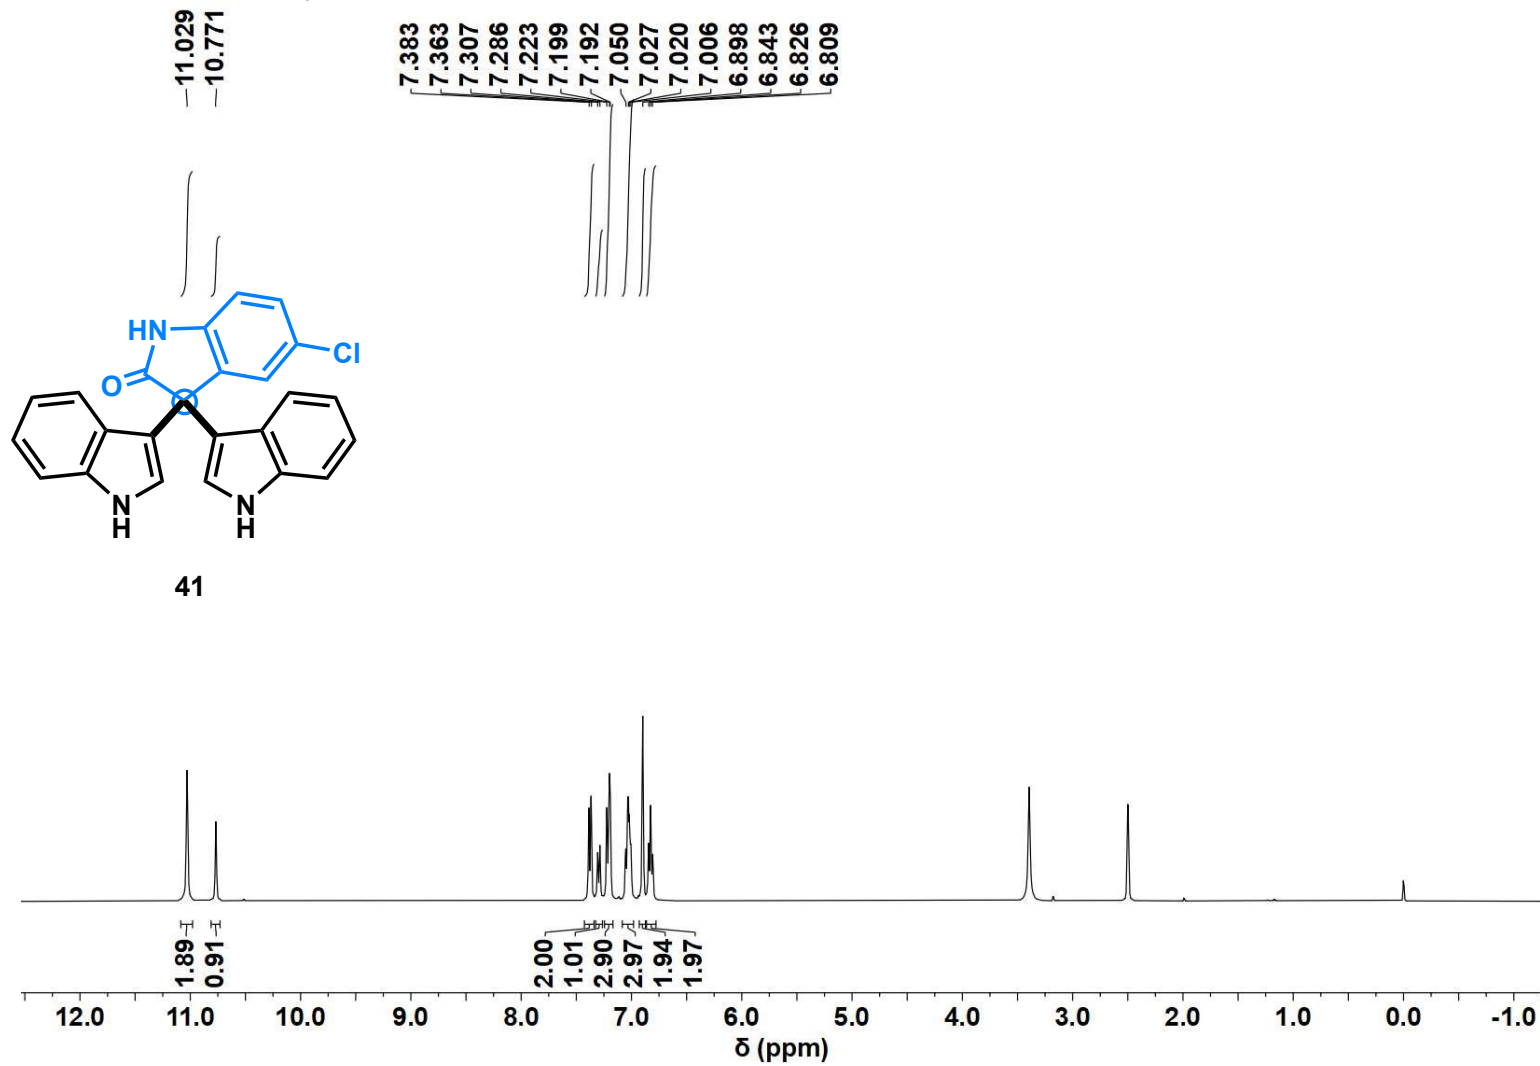

$^{13}\text{C}$  NMR 101 MHz,  $\text{DMSO-}d_6$

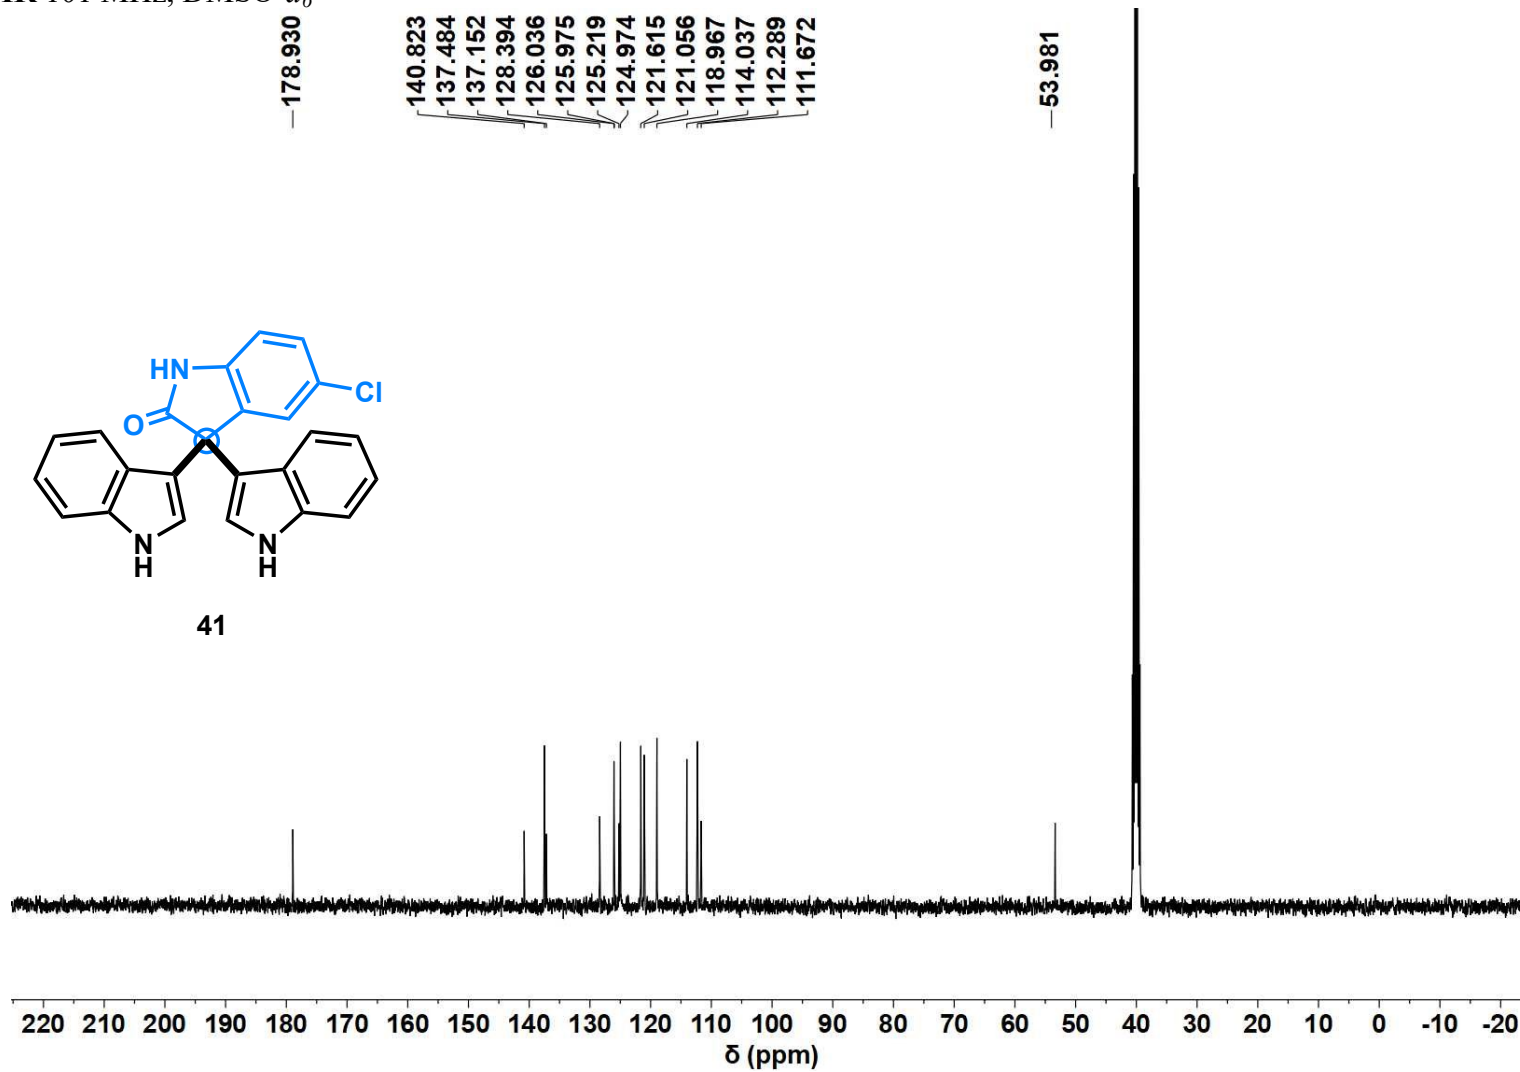

$^1\text{H}$  NMR 400 MHz,  $\text{DMSO-}d_6$

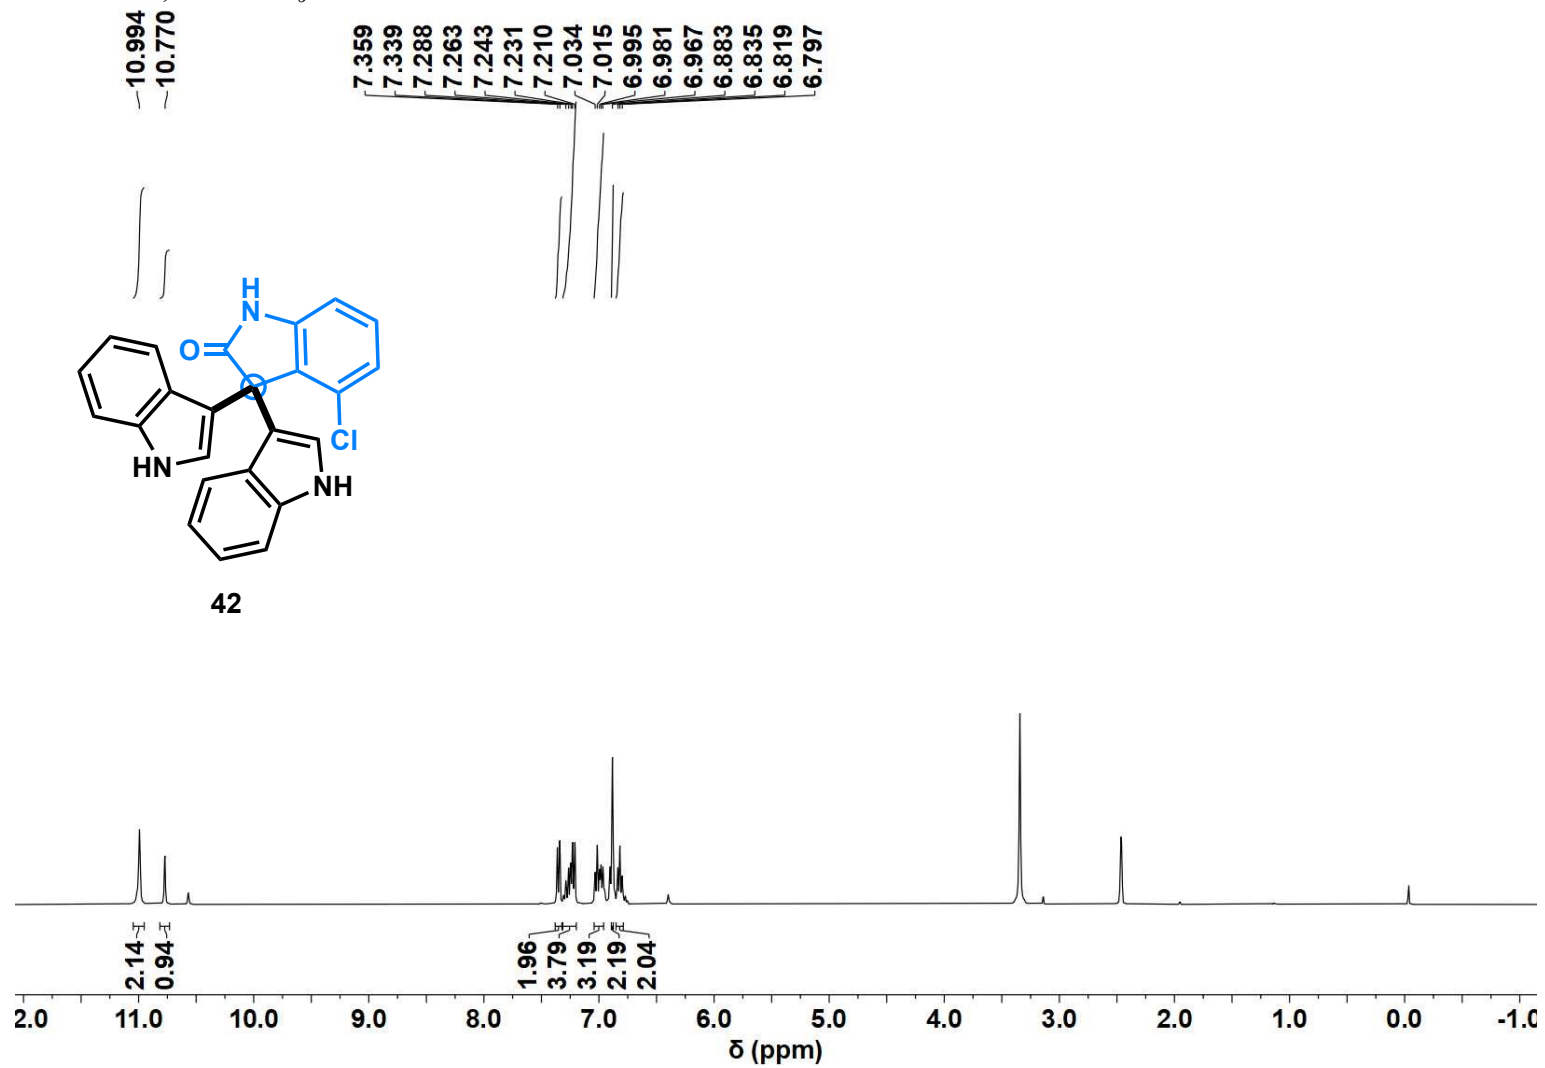

$^{13}\text{C}$  NMR 101 MHz,  $\text{DMSO-}d_6$

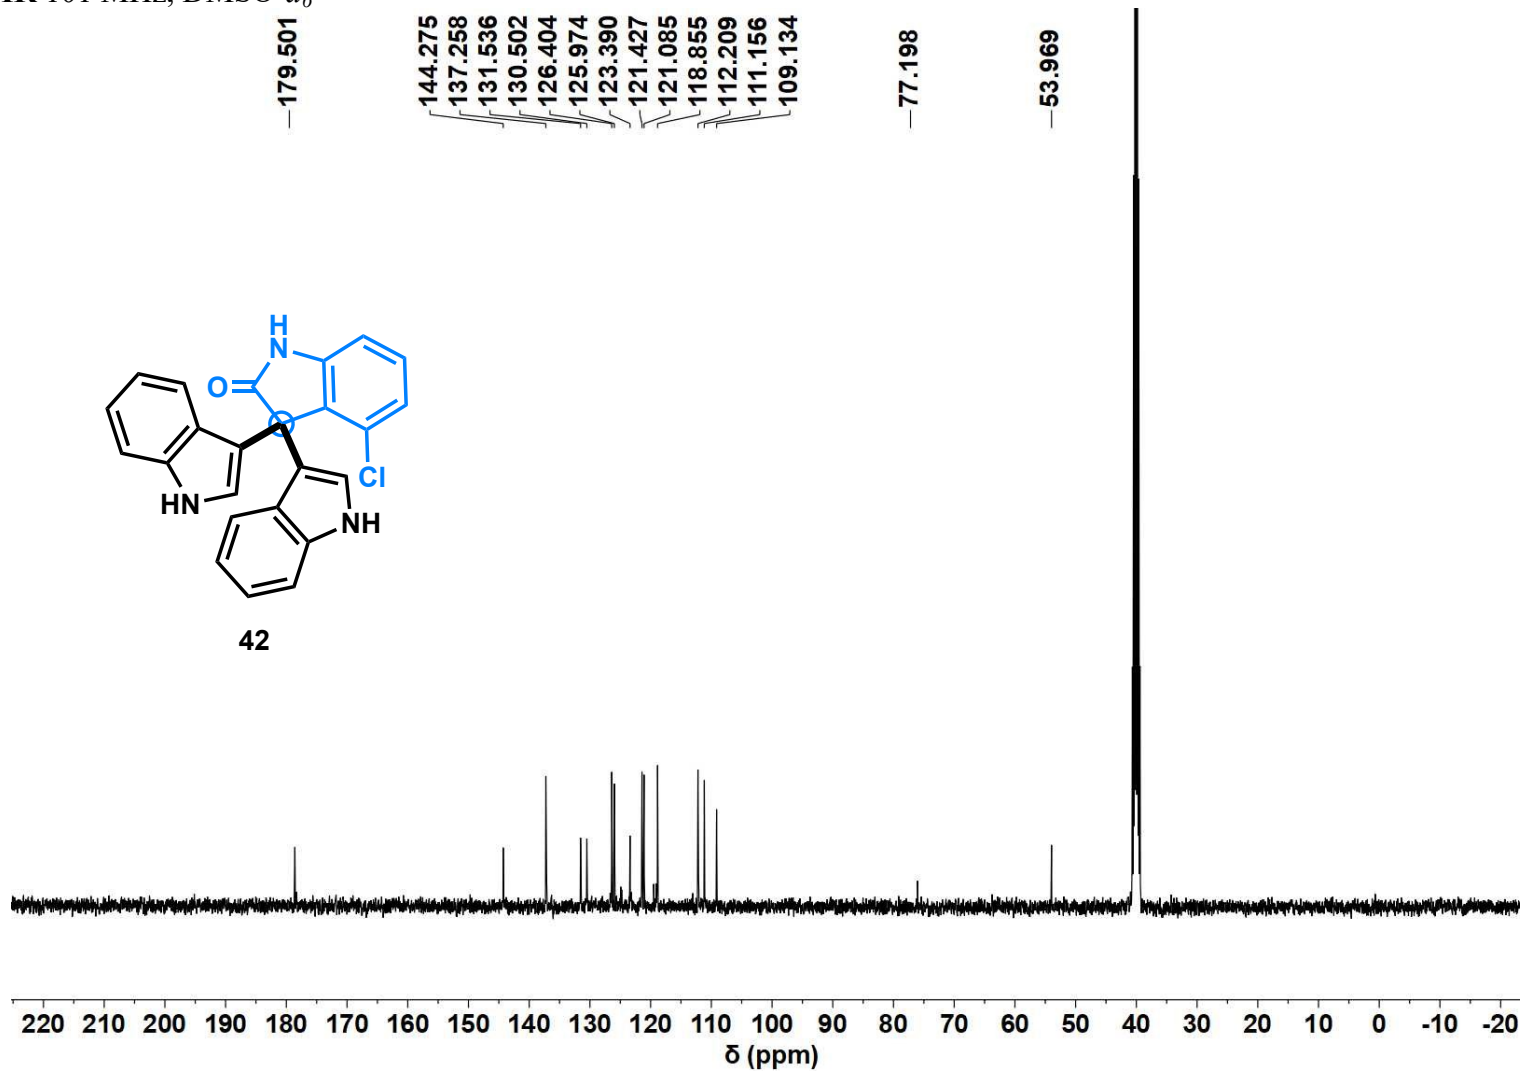



$^1\text{H}$  NMR 400 MHz,  $\text{DMSO-}d_6$

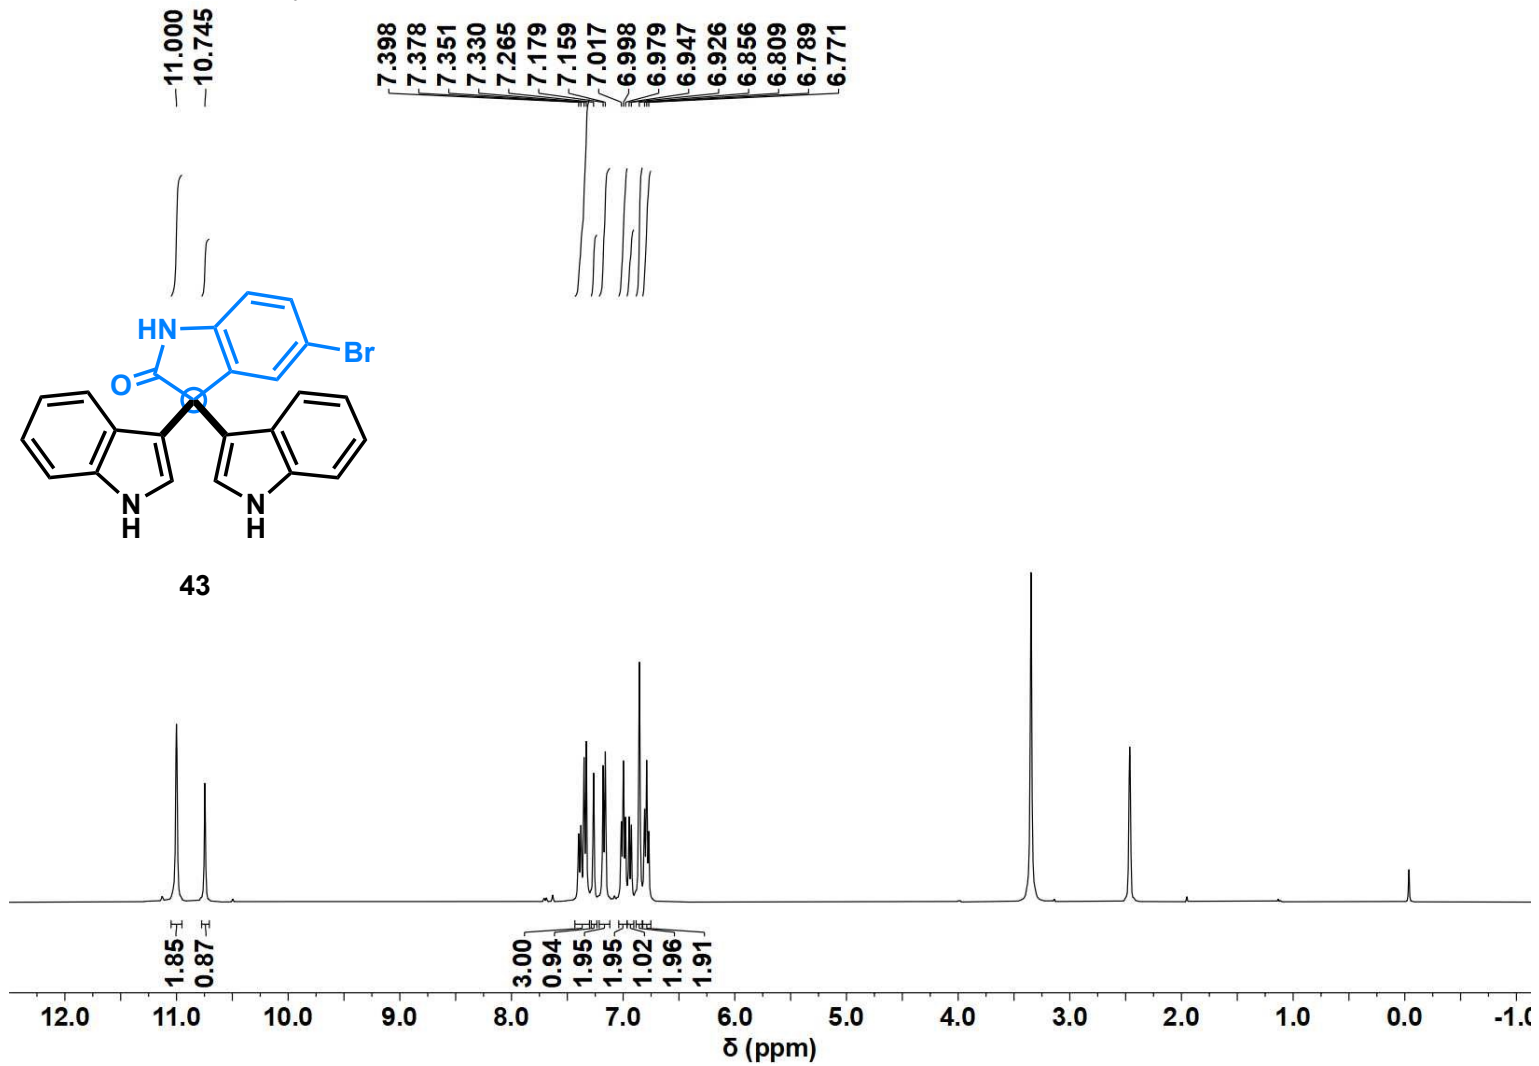

$^{13}\text{C}$  NMR 101 MHz,  $\text{DMSO-}d_6$

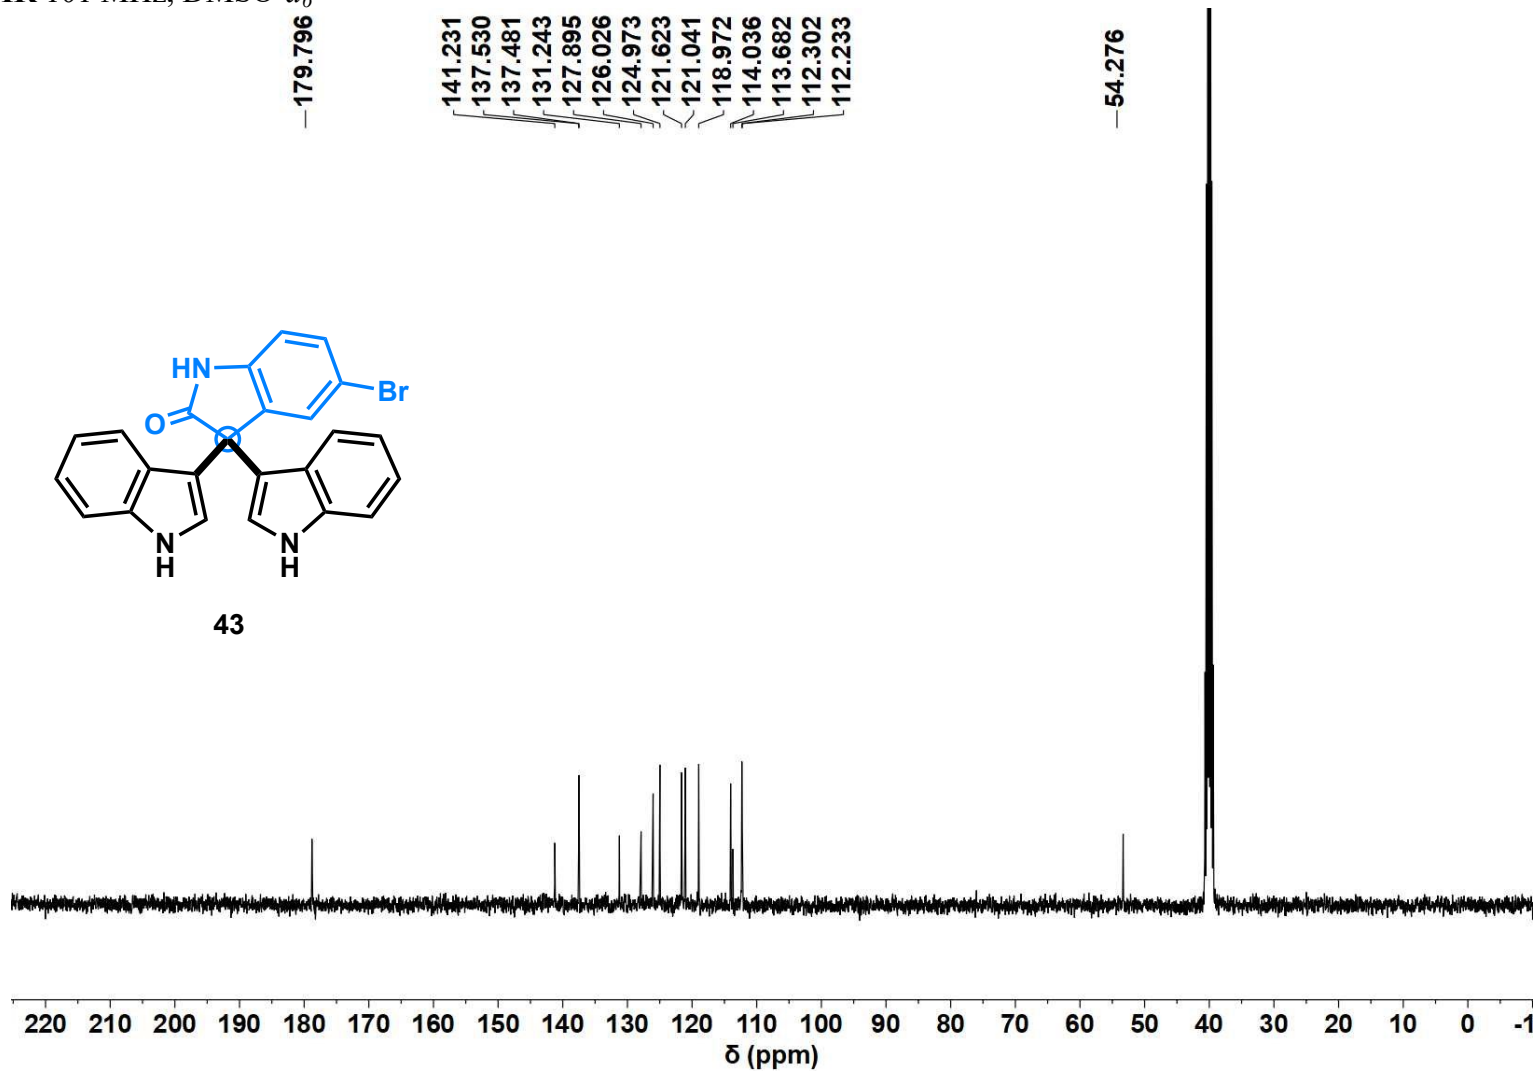

$^1\text{H}$  NMR 400 MHz,  $\text{DMSO-}d_6$

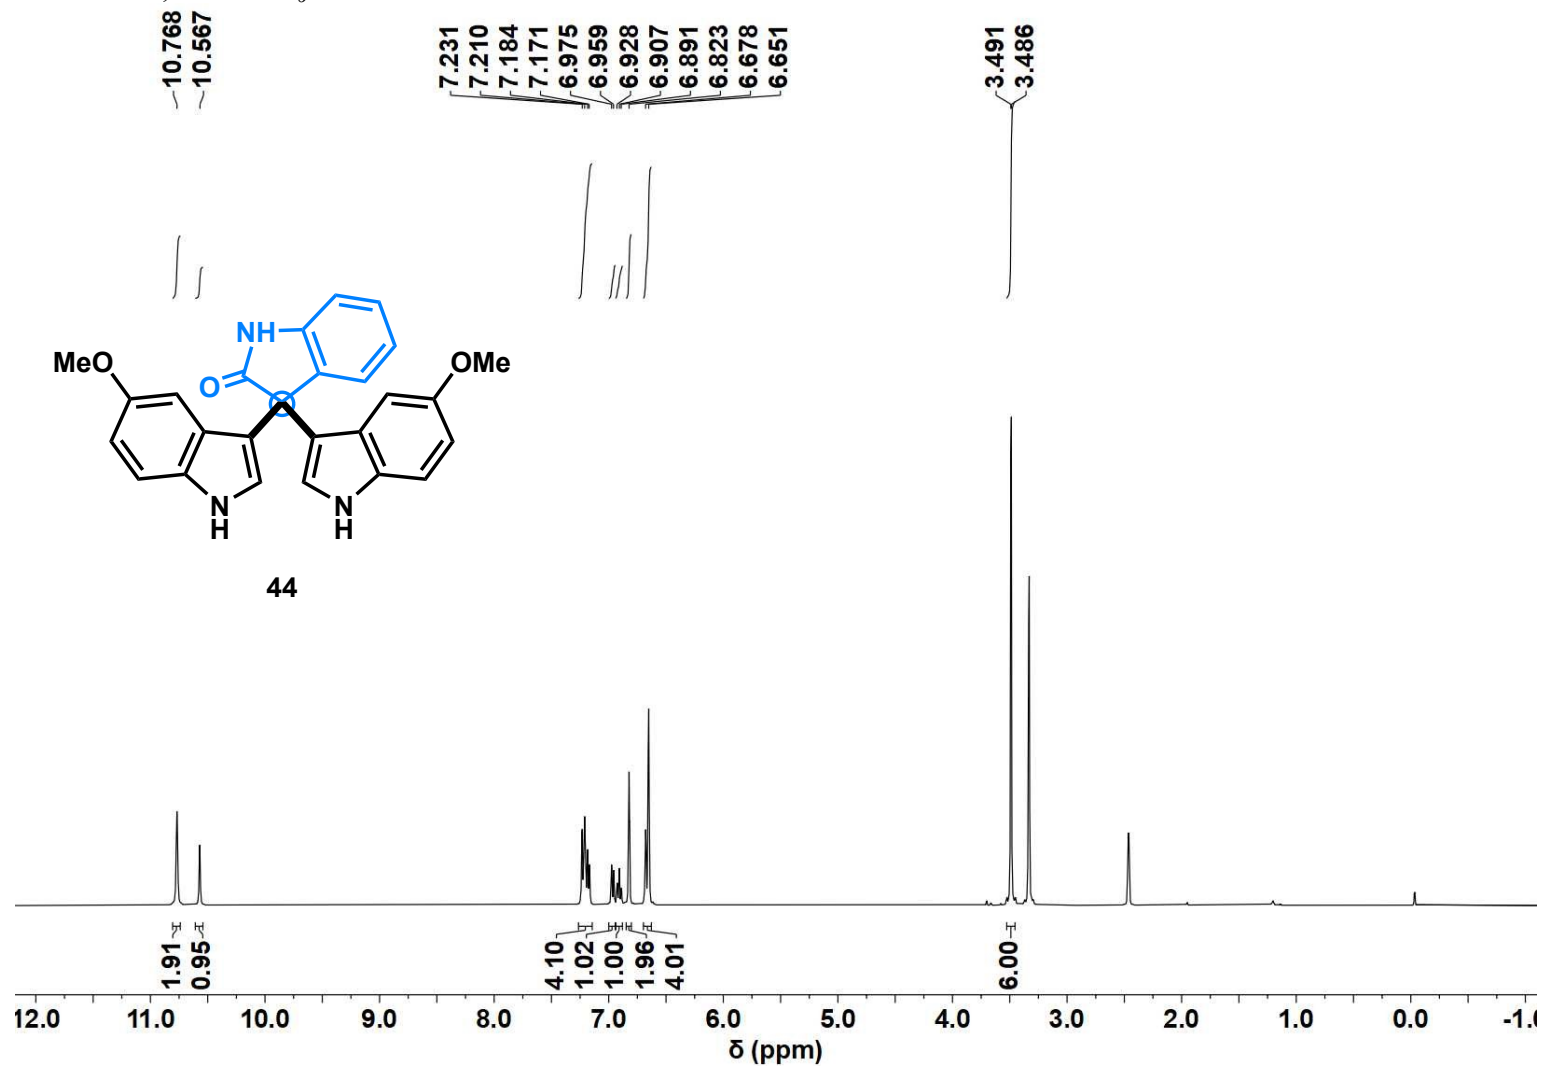

$^{13}\text{C}$  NMR 101 MHz,  $\text{DMSO-}d_6$

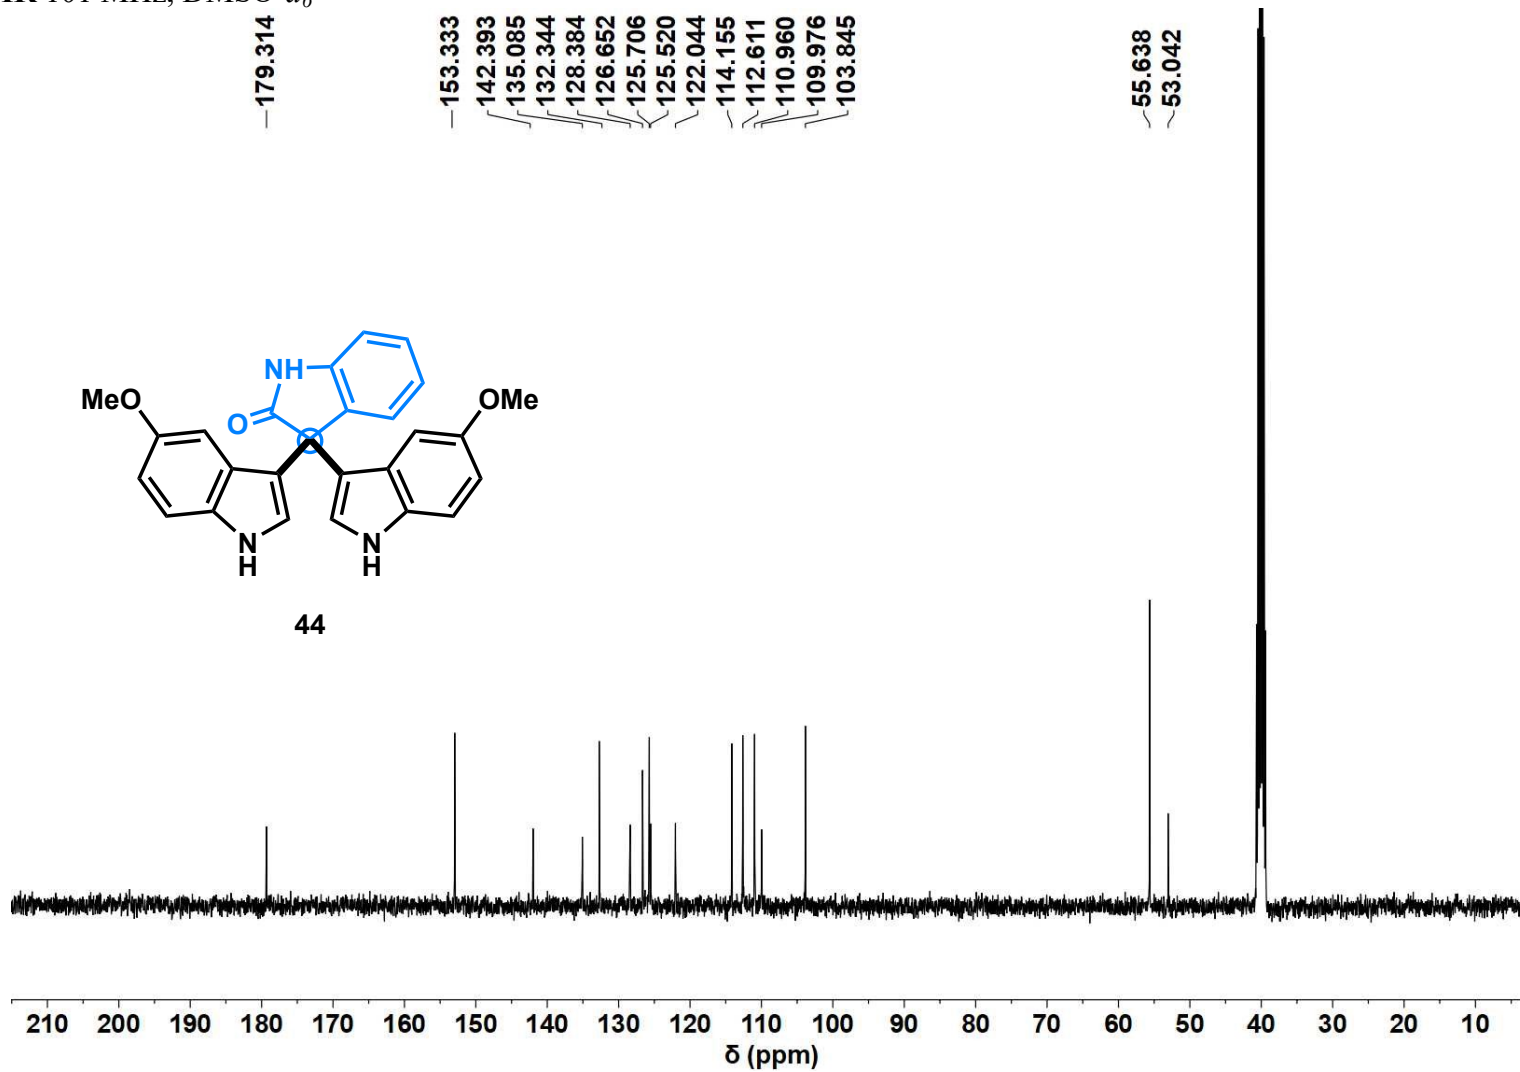

$^1\text{H}$  NMR 400 MHz,  $\text{DMSO-}d_6$

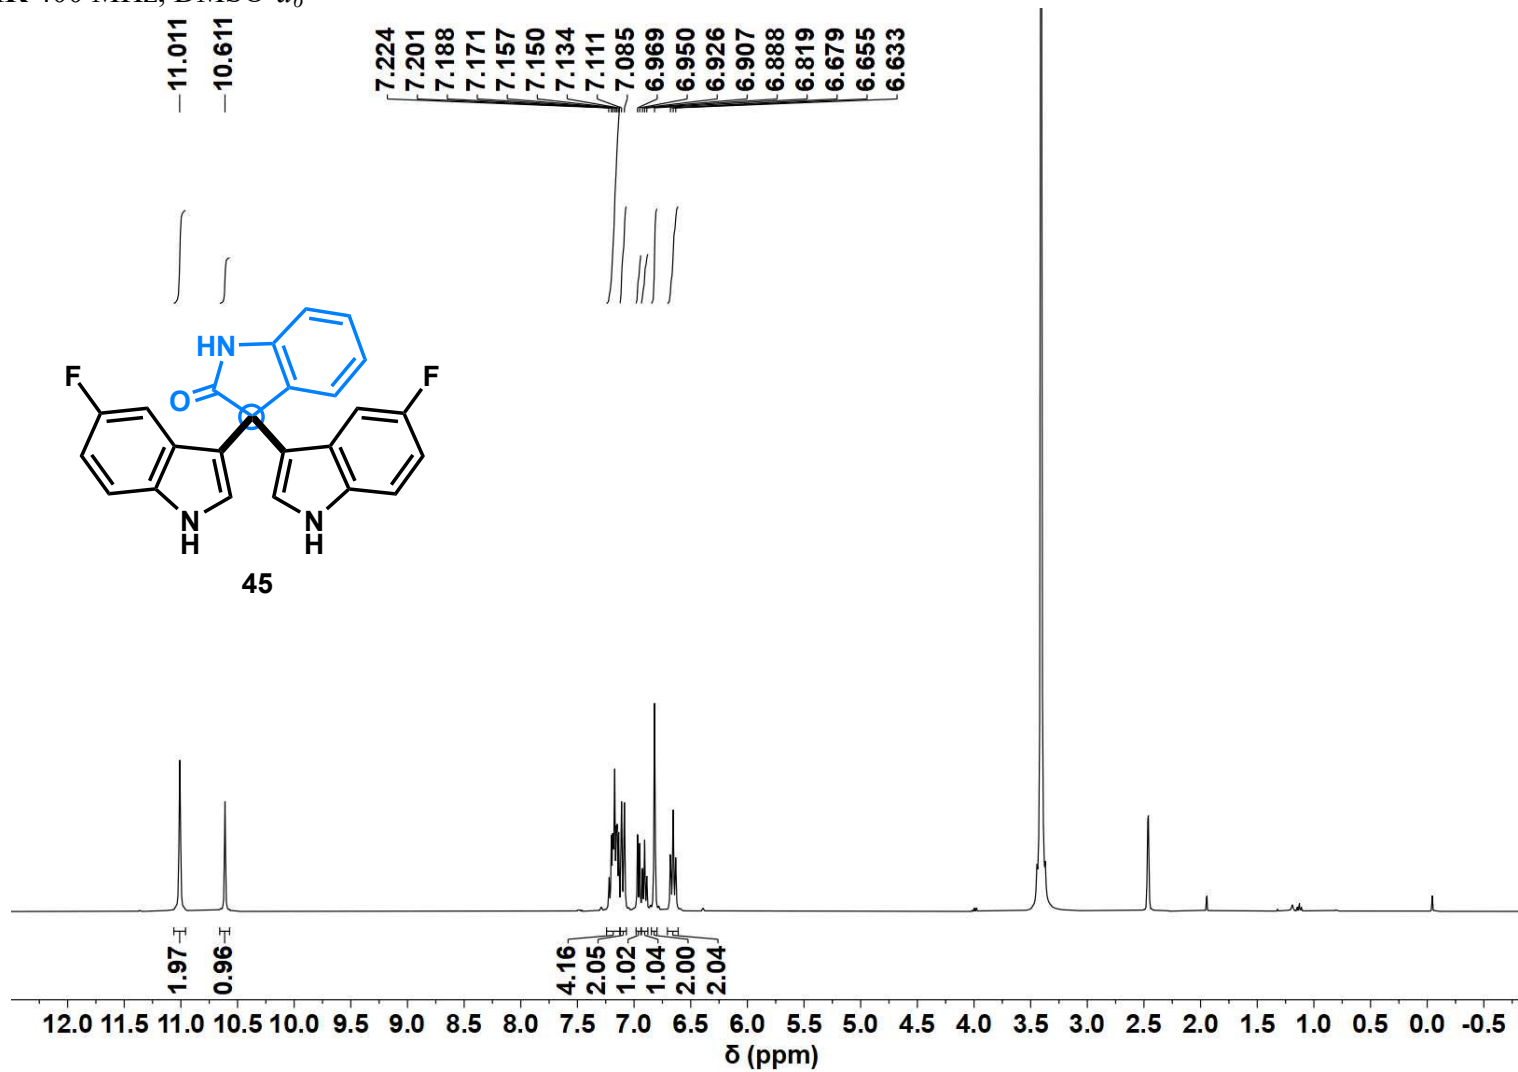

$^{13}\text{C}$  NMR 101 MHz,  $\text{DMSO-}d_6$

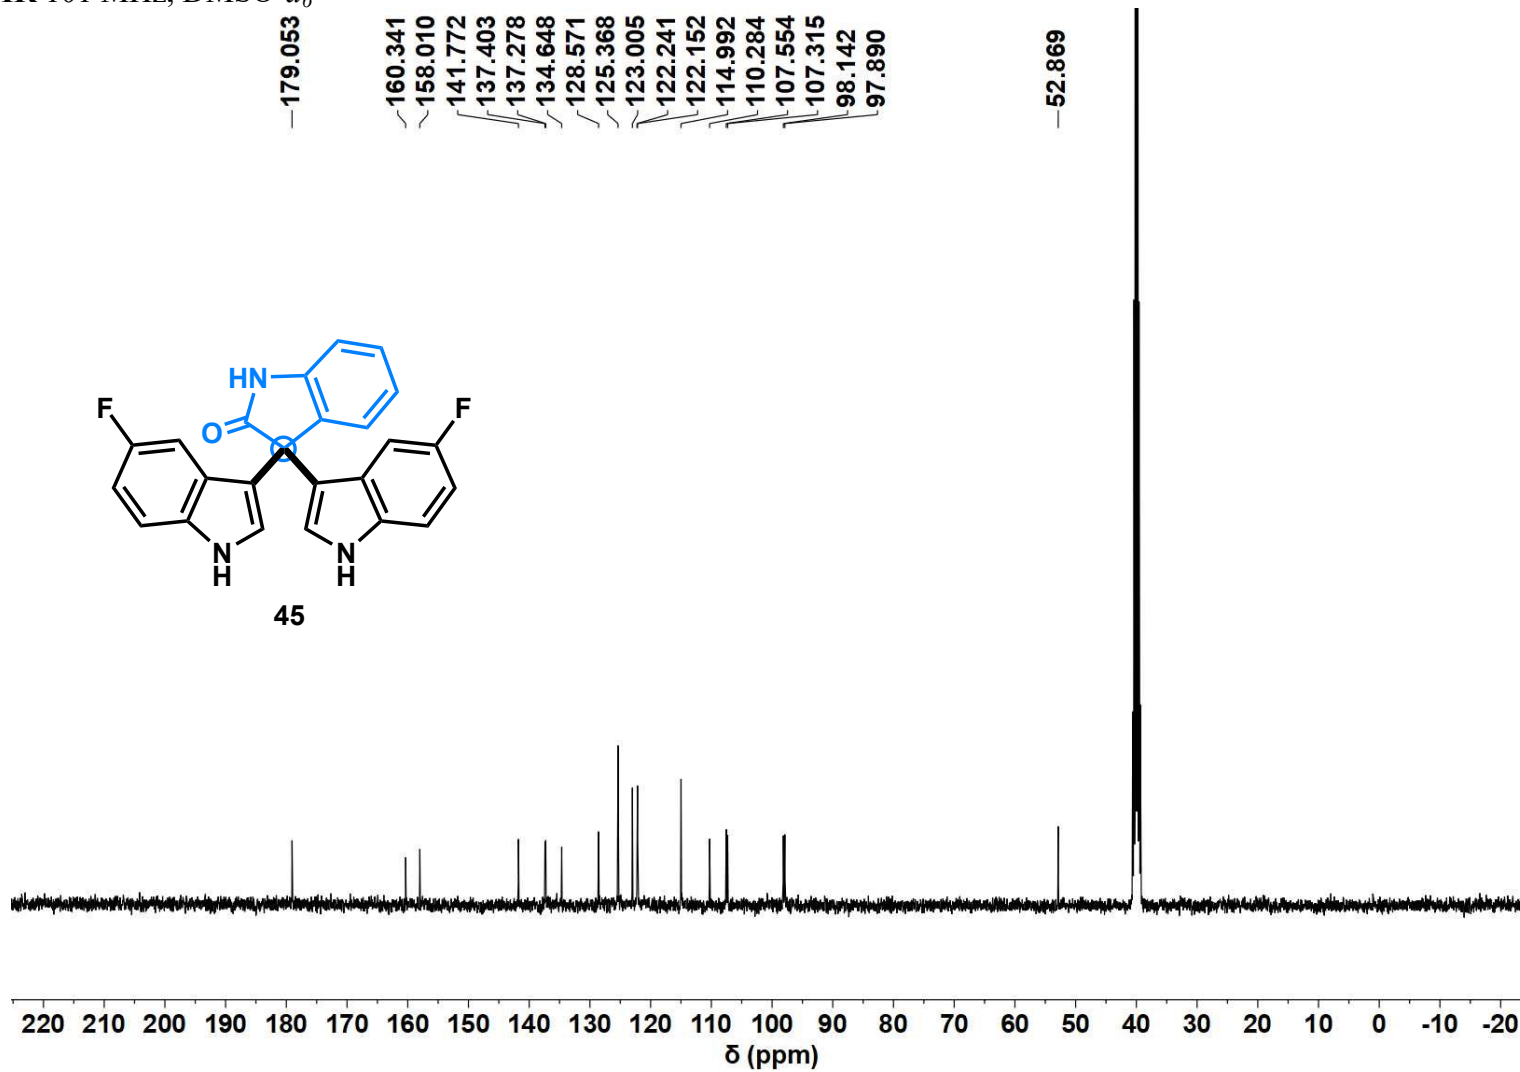

$^{19}\text{F}$  NMR 376 MHz,  $\text{DMSO-}d_6$

-121.884  
-121.908  
-121.924  
-121.935  
-121.951  
-121.979

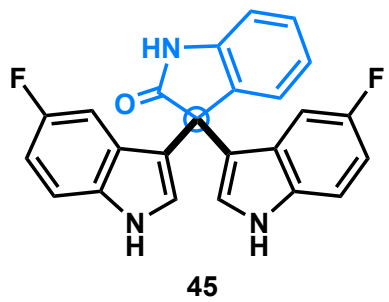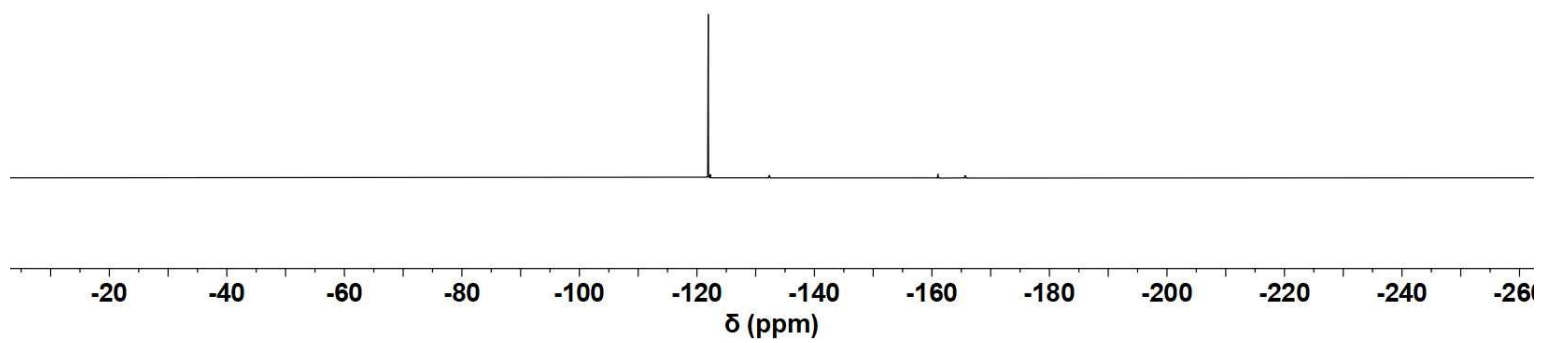

$^1\text{H}$  NMR 400 MHz,  $\text{DMSO-}d_6$

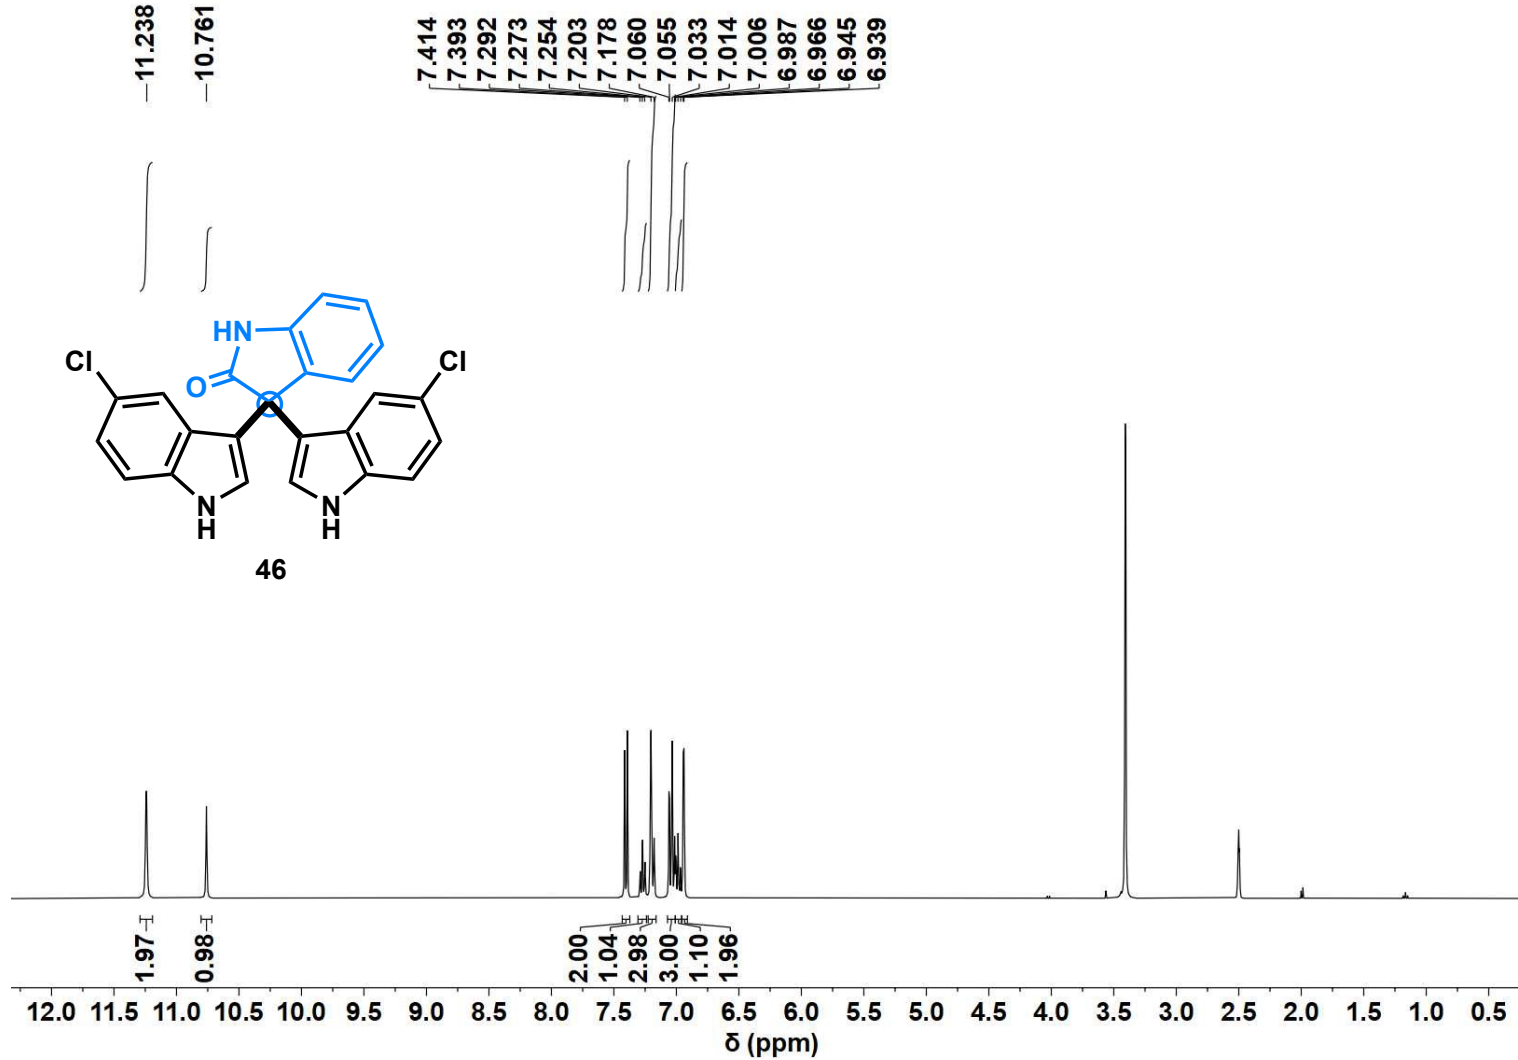



$^{13}\text{C}$  NMR 101 MHz,  $\text{DMSO-}d_6$

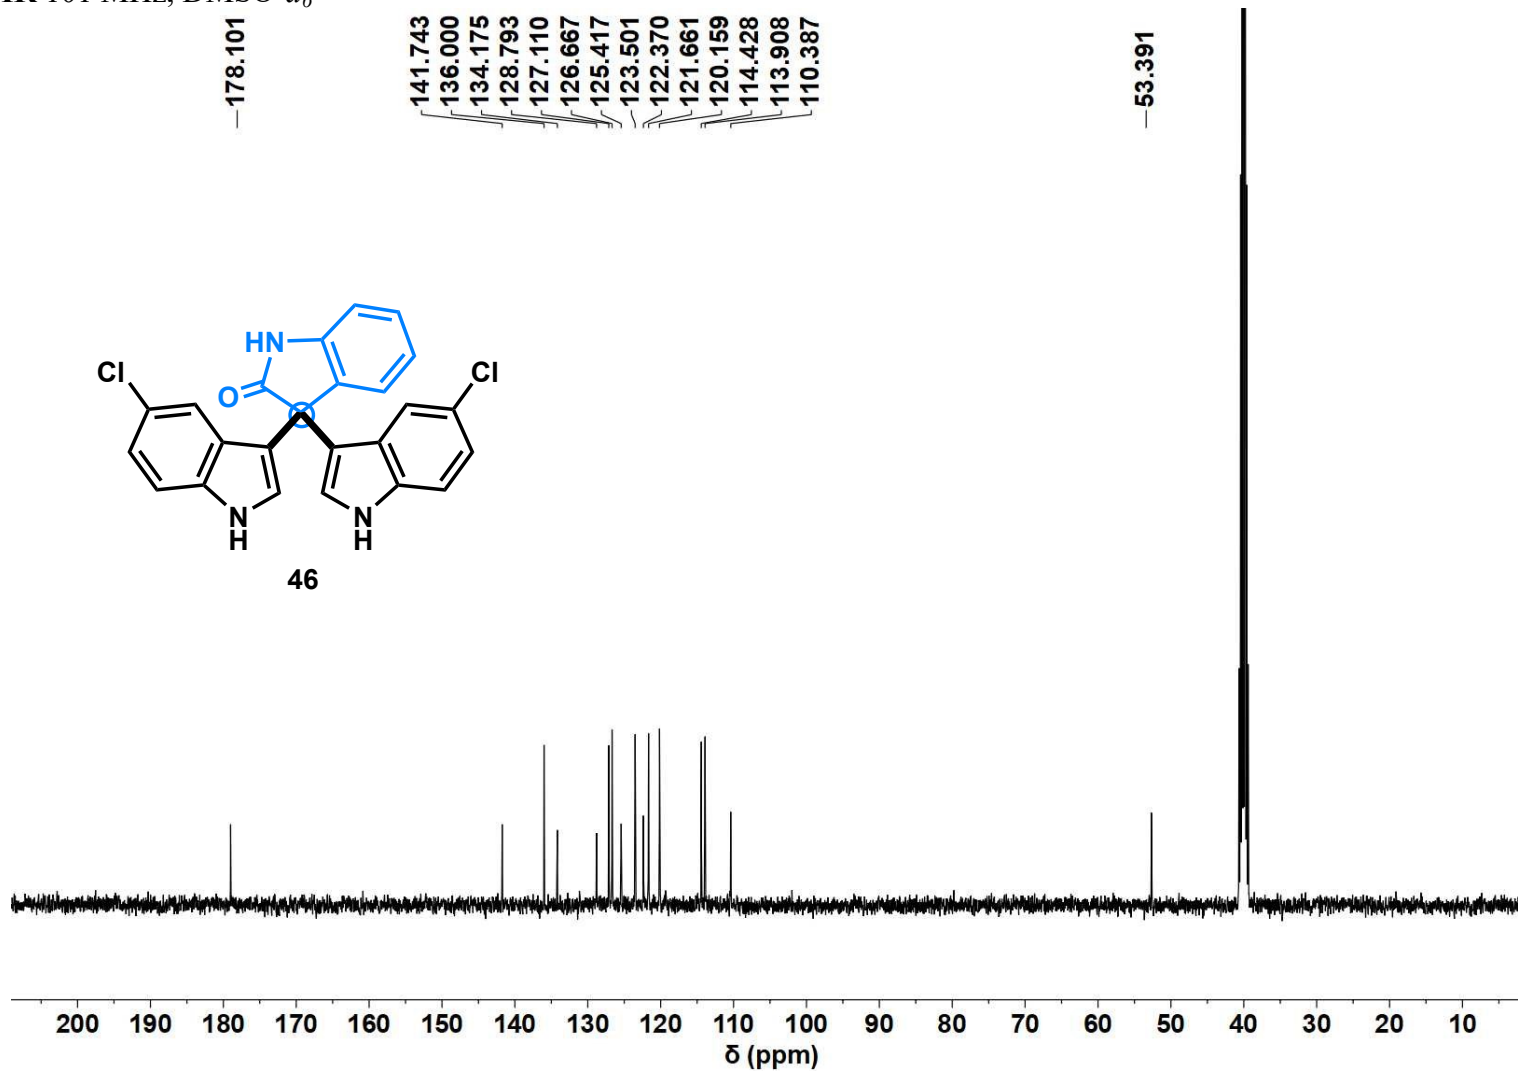

$^1\text{H}$  NMR 400 MHz,  $\text{DMSO-}d_6$

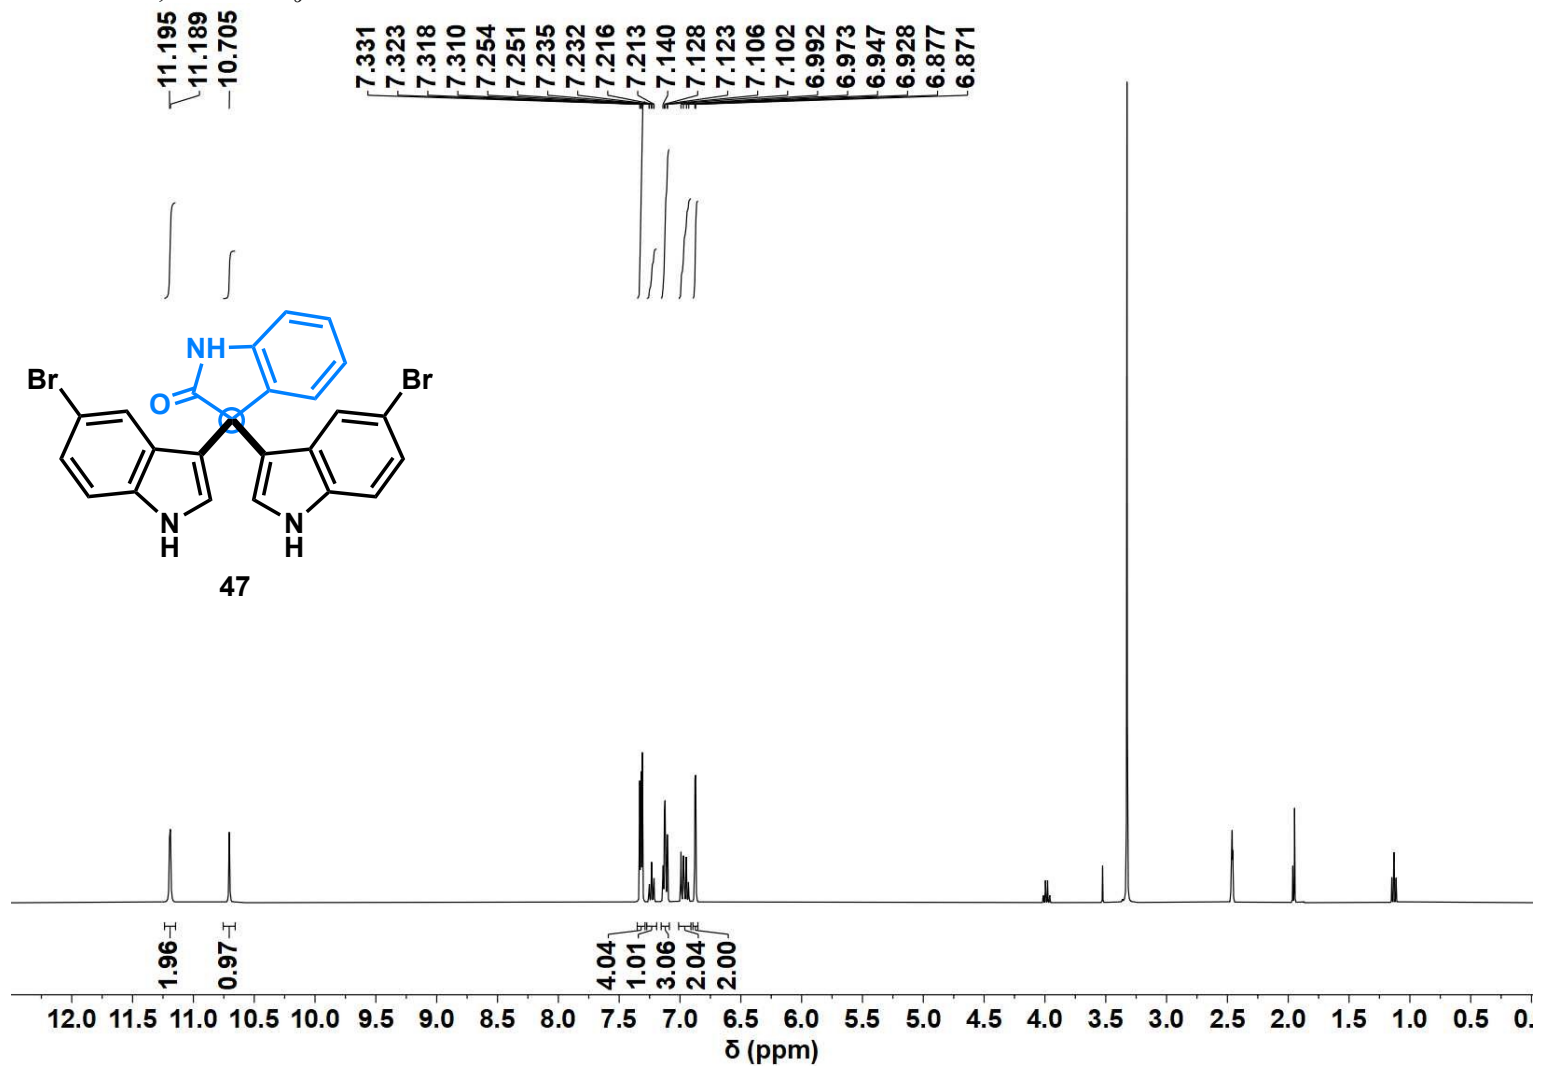

$^{13}\text{C}$  NMR 101 MHz,  $\text{DMSO-}d_6$

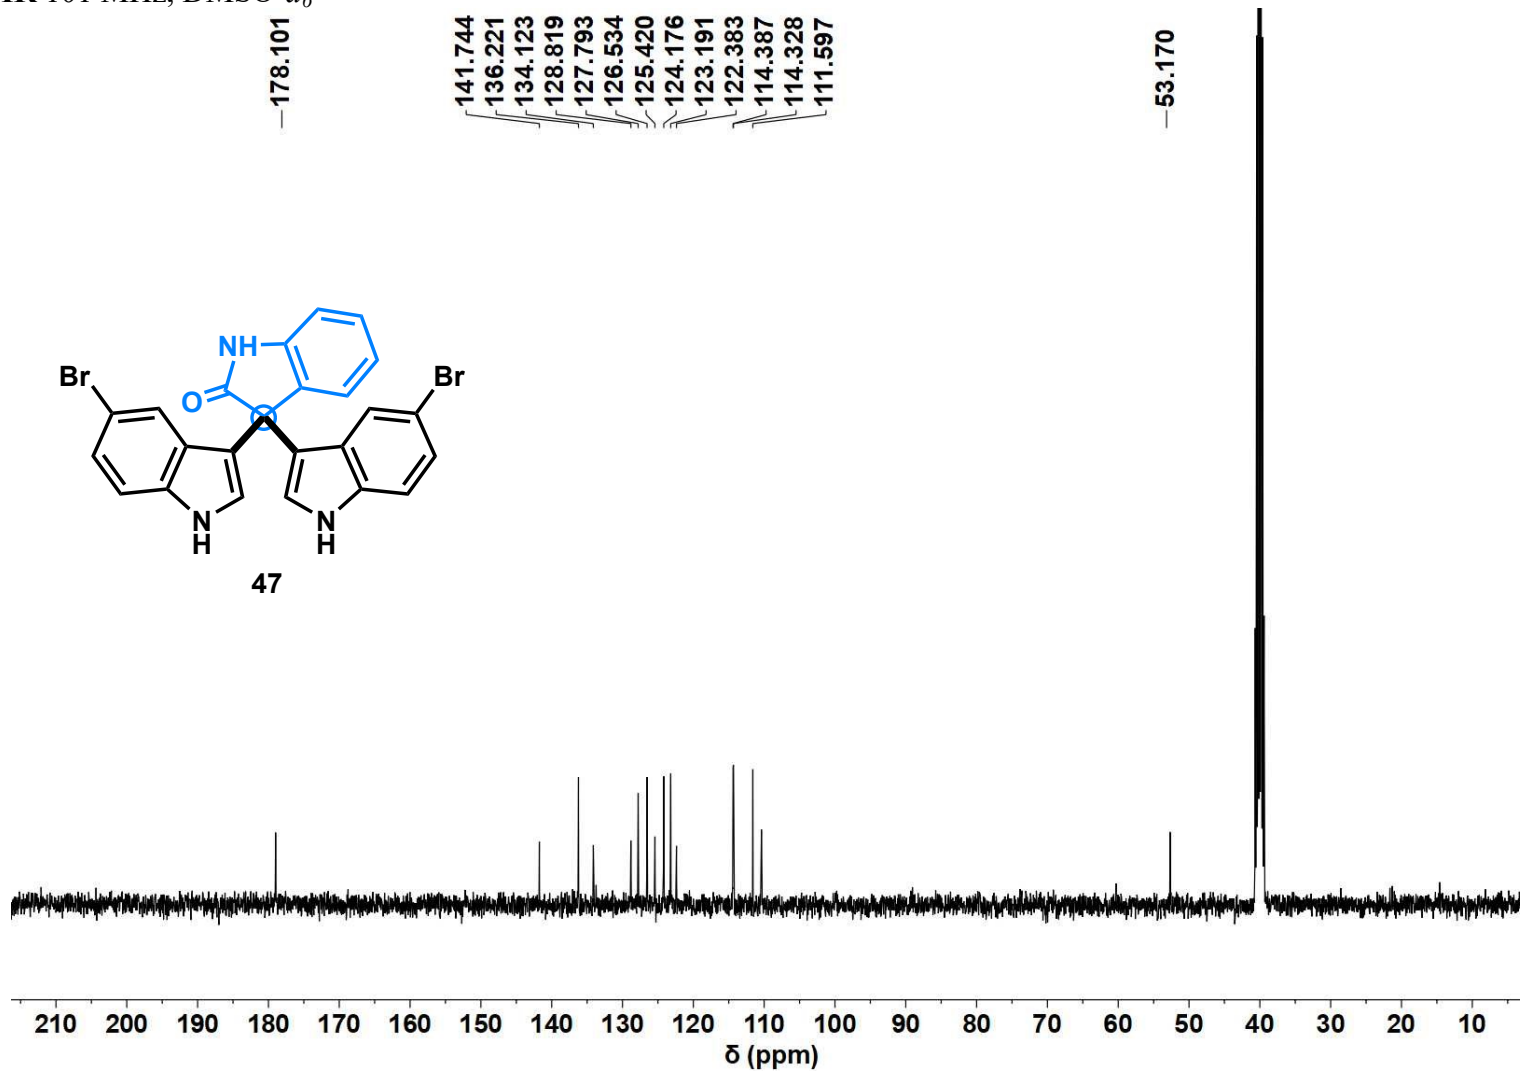

$^1\text{H}$  NMR 400 MHz,  $\text{DMSO-}d_6$

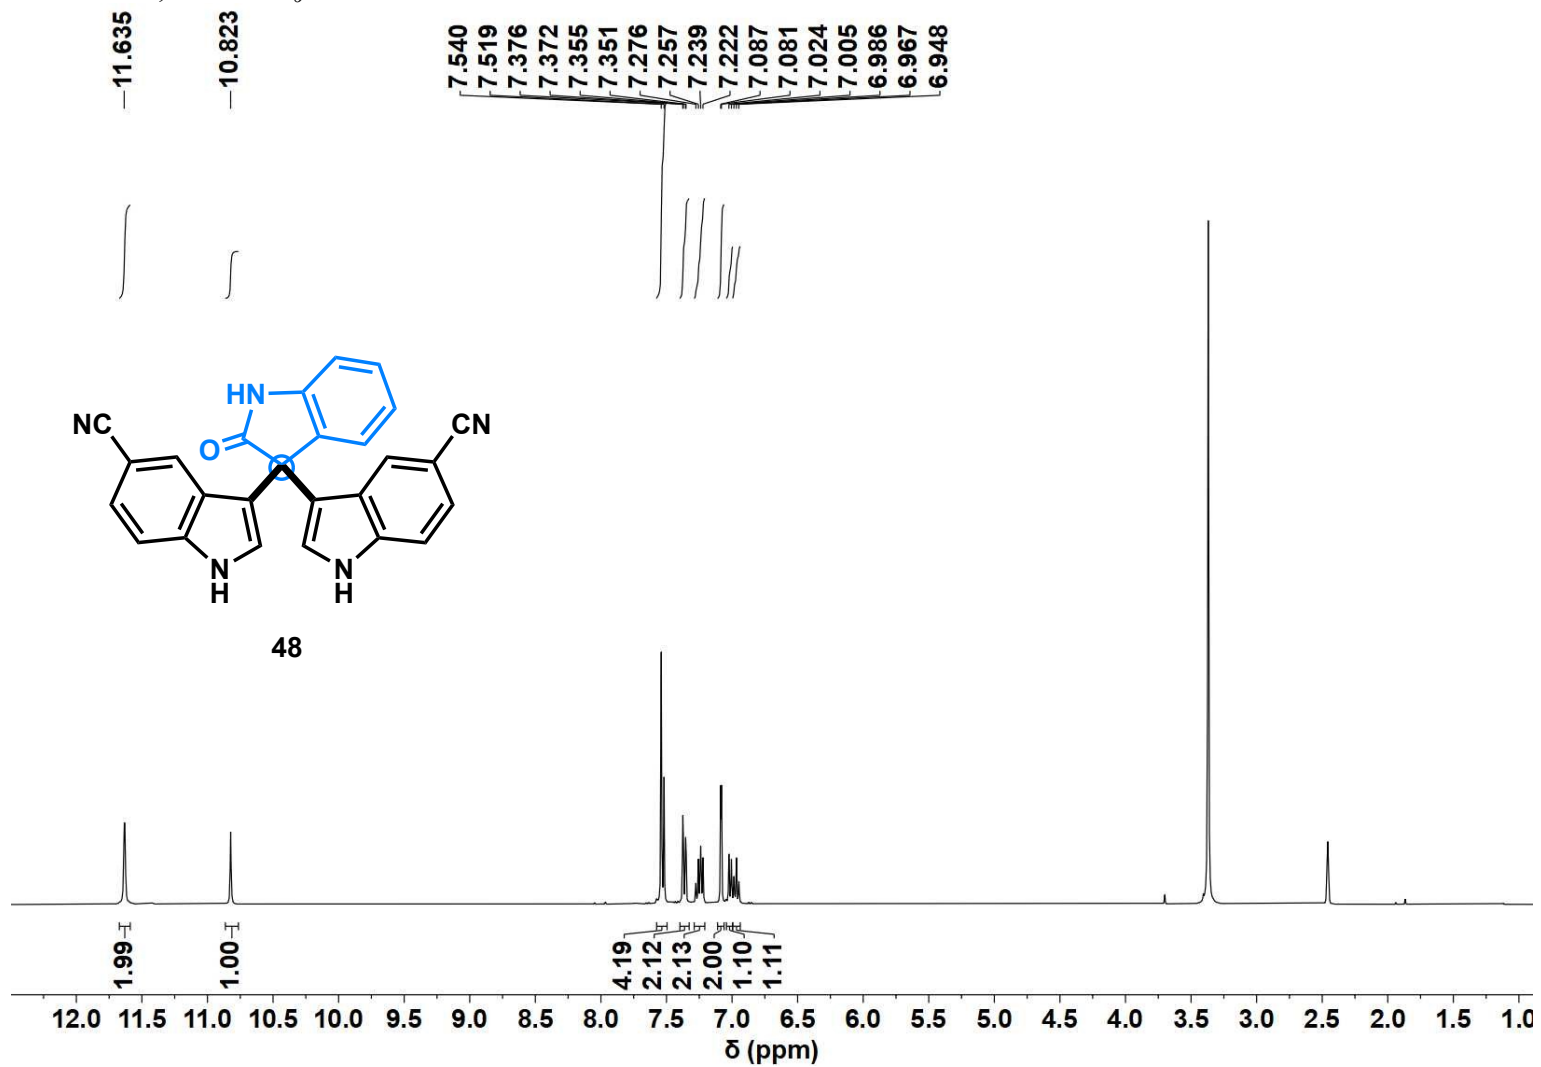

$^{13}\text{C}$  NMR 101 MHz,  $\text{DMSO-}d_6$

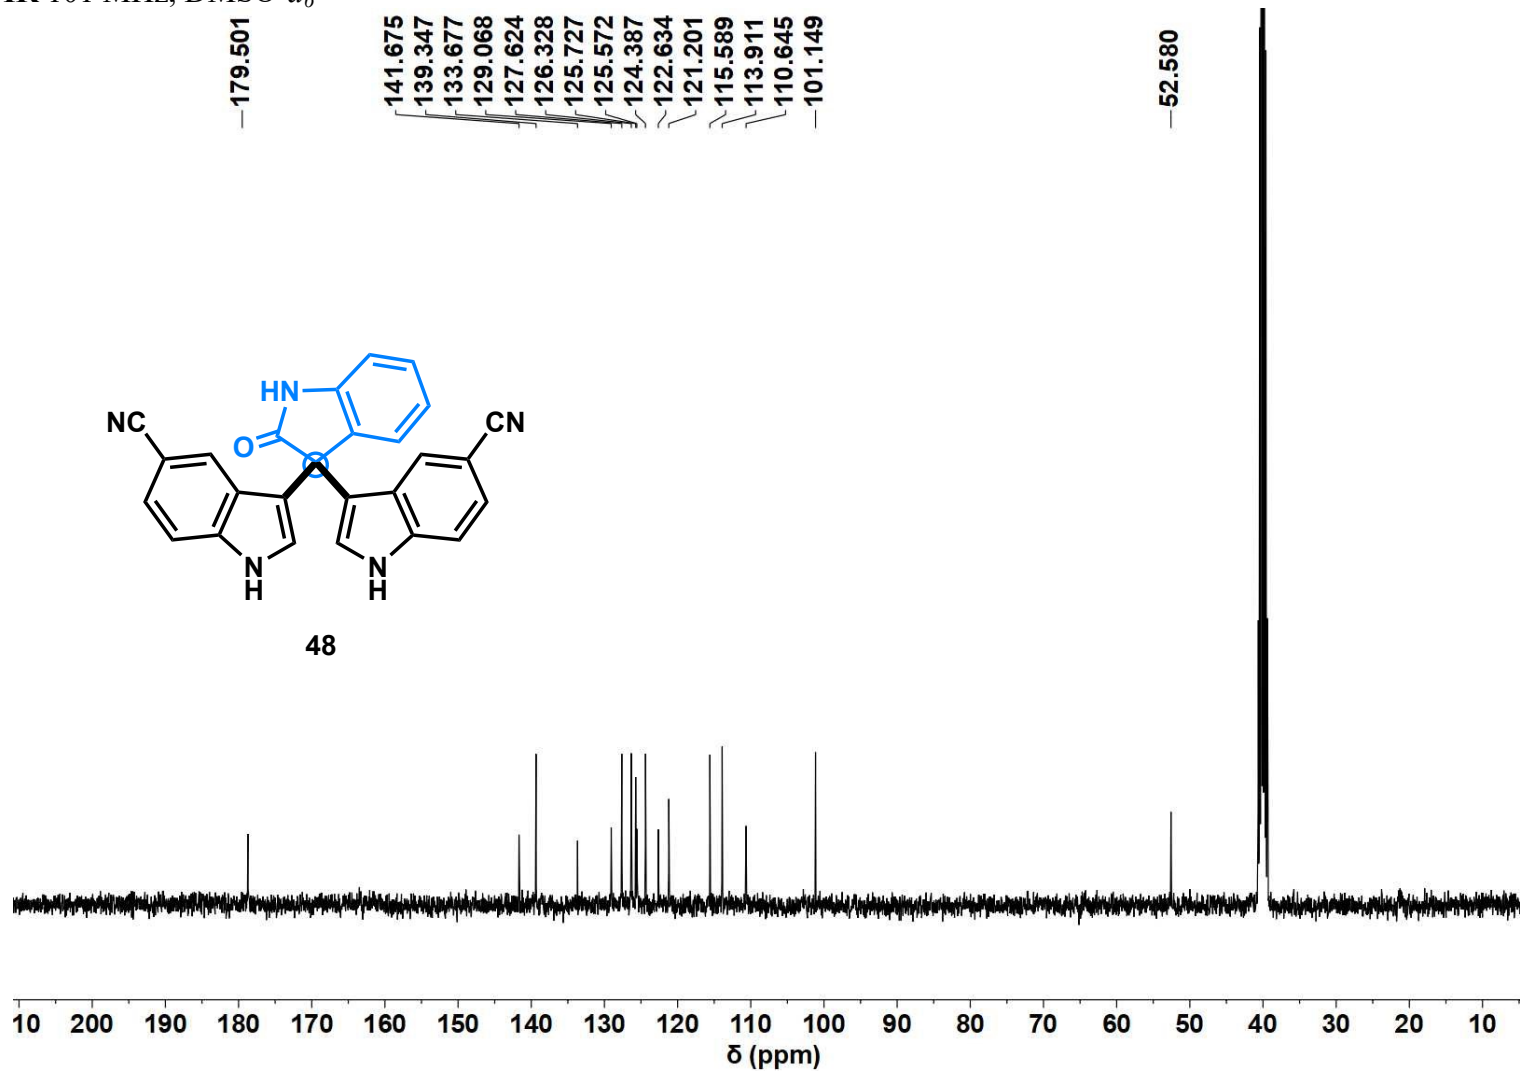

$^1\text{H}$  NMR 400 MHz,  $\text{DMSO-}d_6$

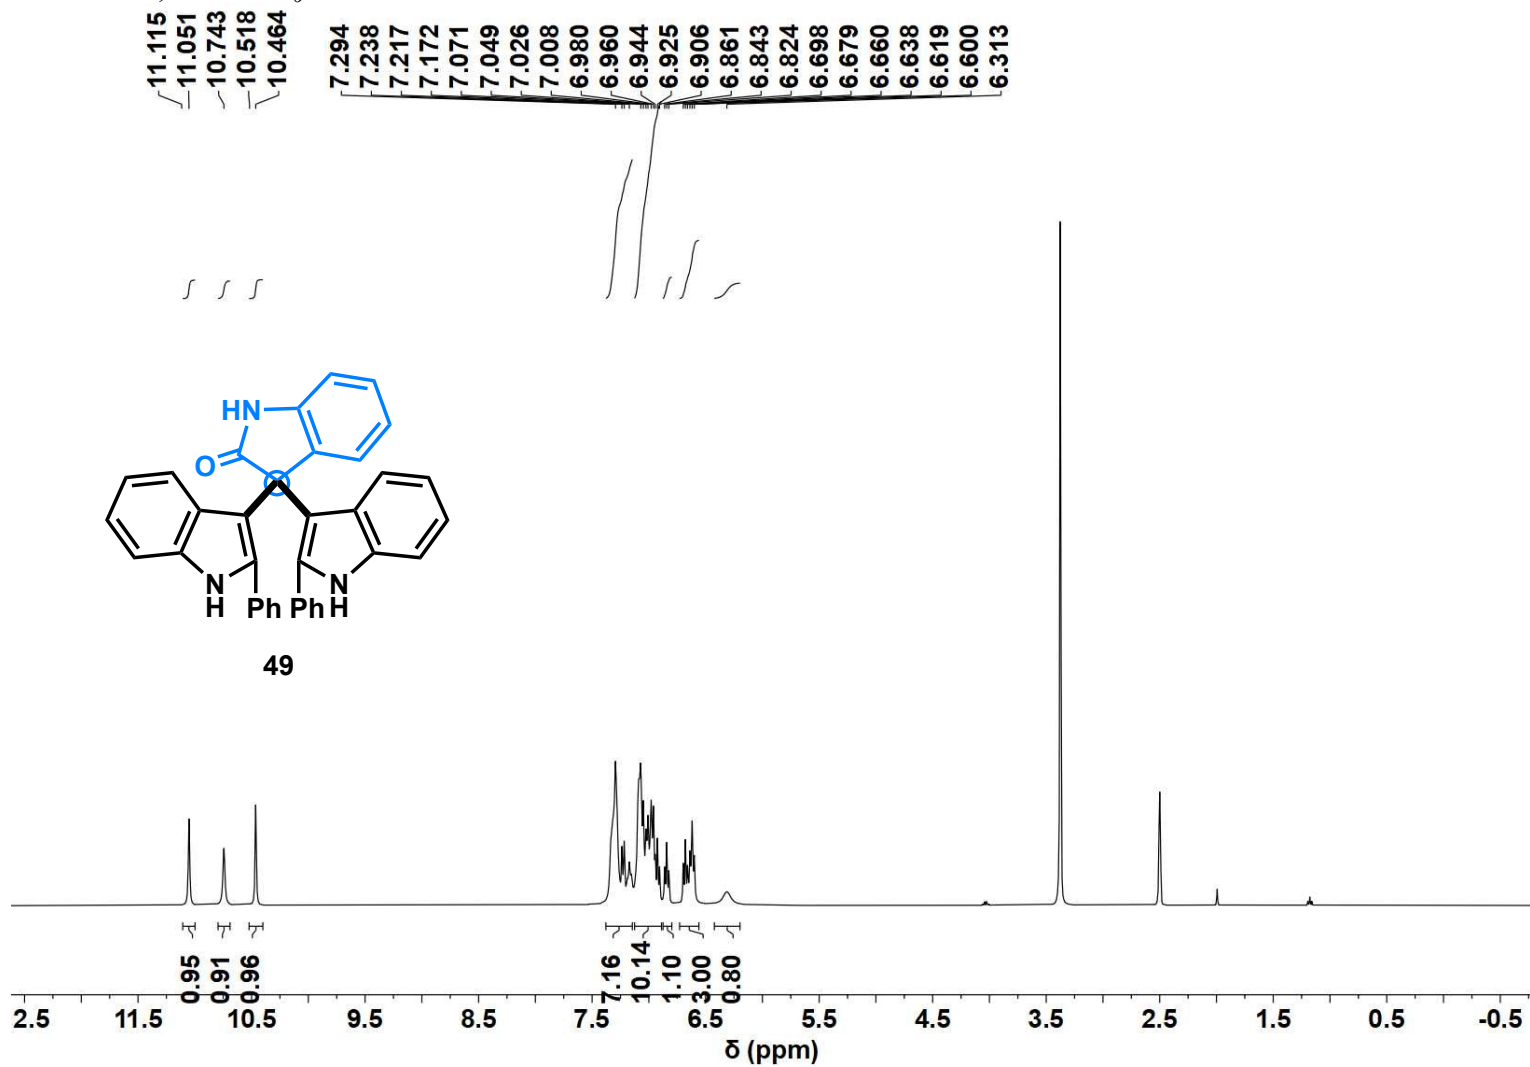

$^{13}\text{C}$  NMR 101 MHz,  $\text{DMSO-}d_6$

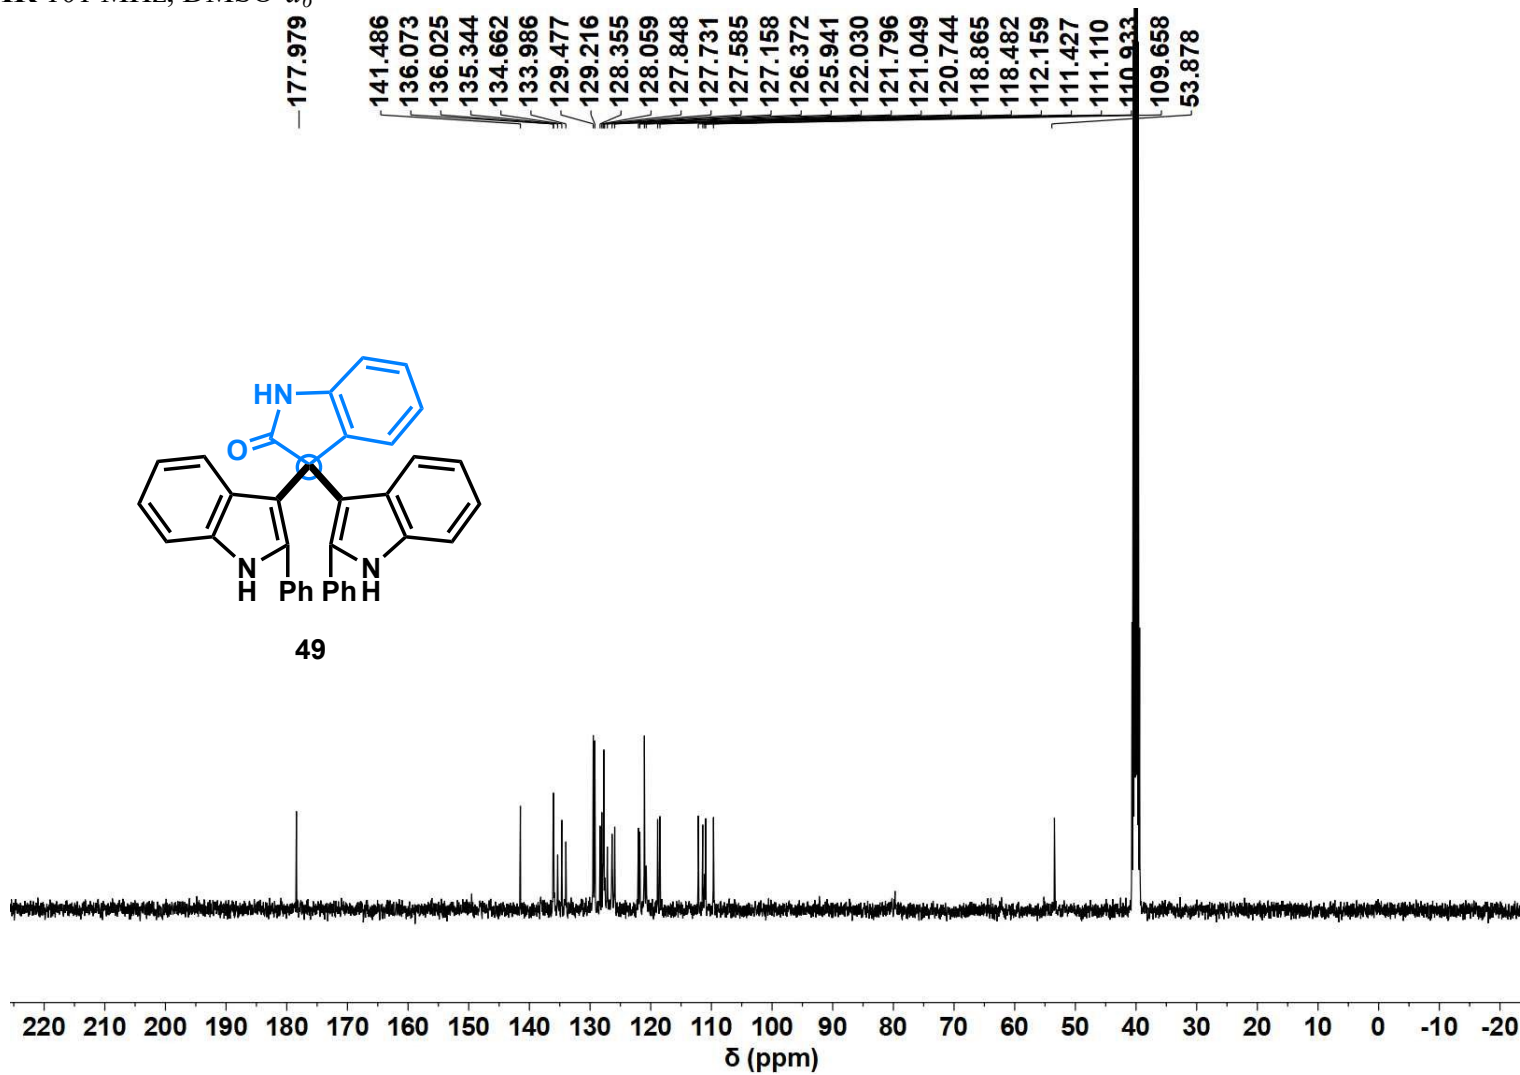

$^1\text{H}$  NMR 400 MHz,  $\text{CD}_3\text{OD}$

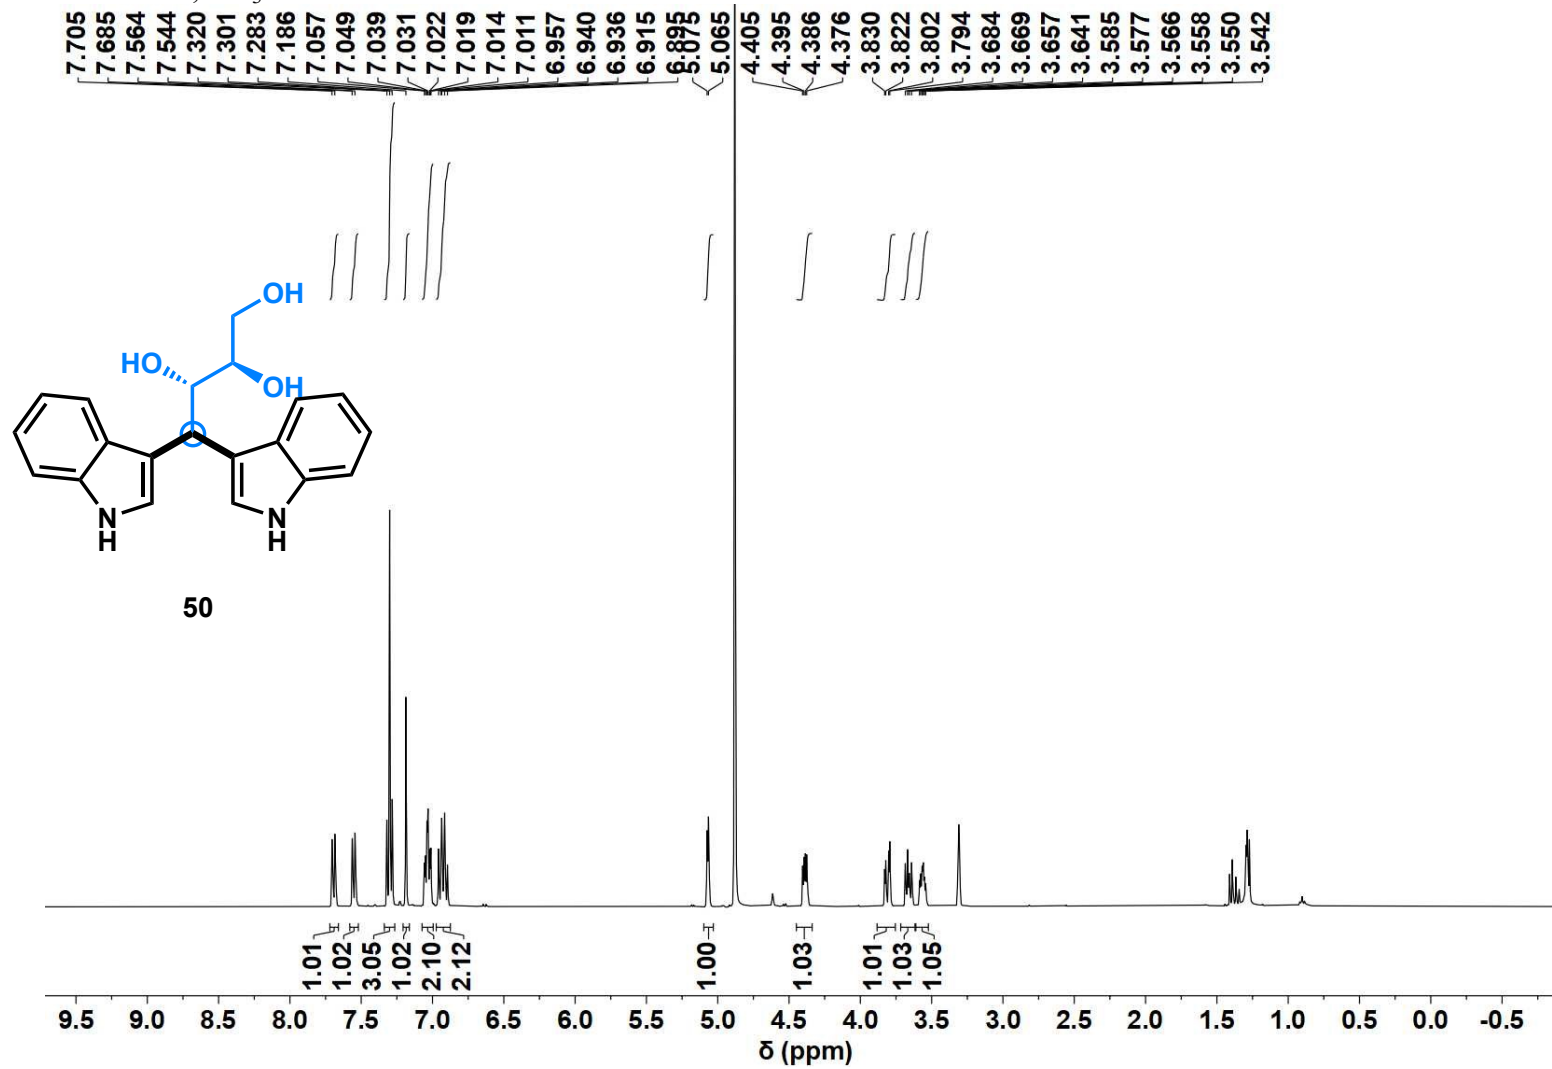



$^{13}\text{C}$  NMR 101 MHz,  $\text{CD}_3\text{OD}$

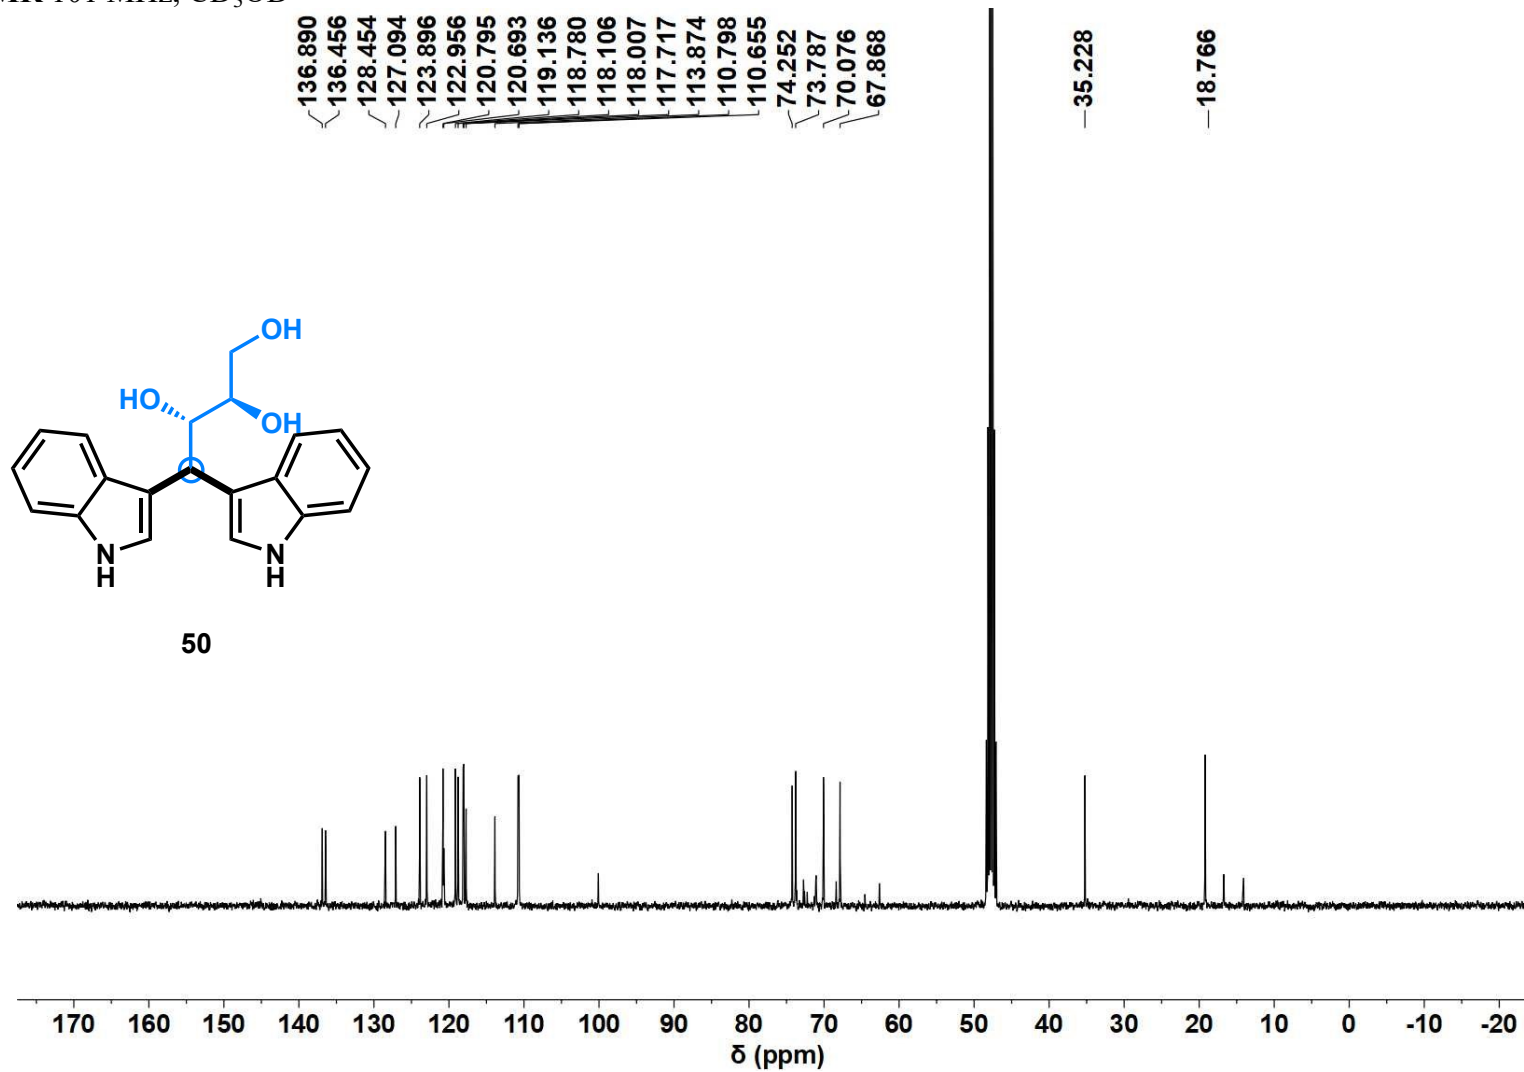

<sup>1</sup>H NMR 400 MHz, CD<sub>3</sub>OD

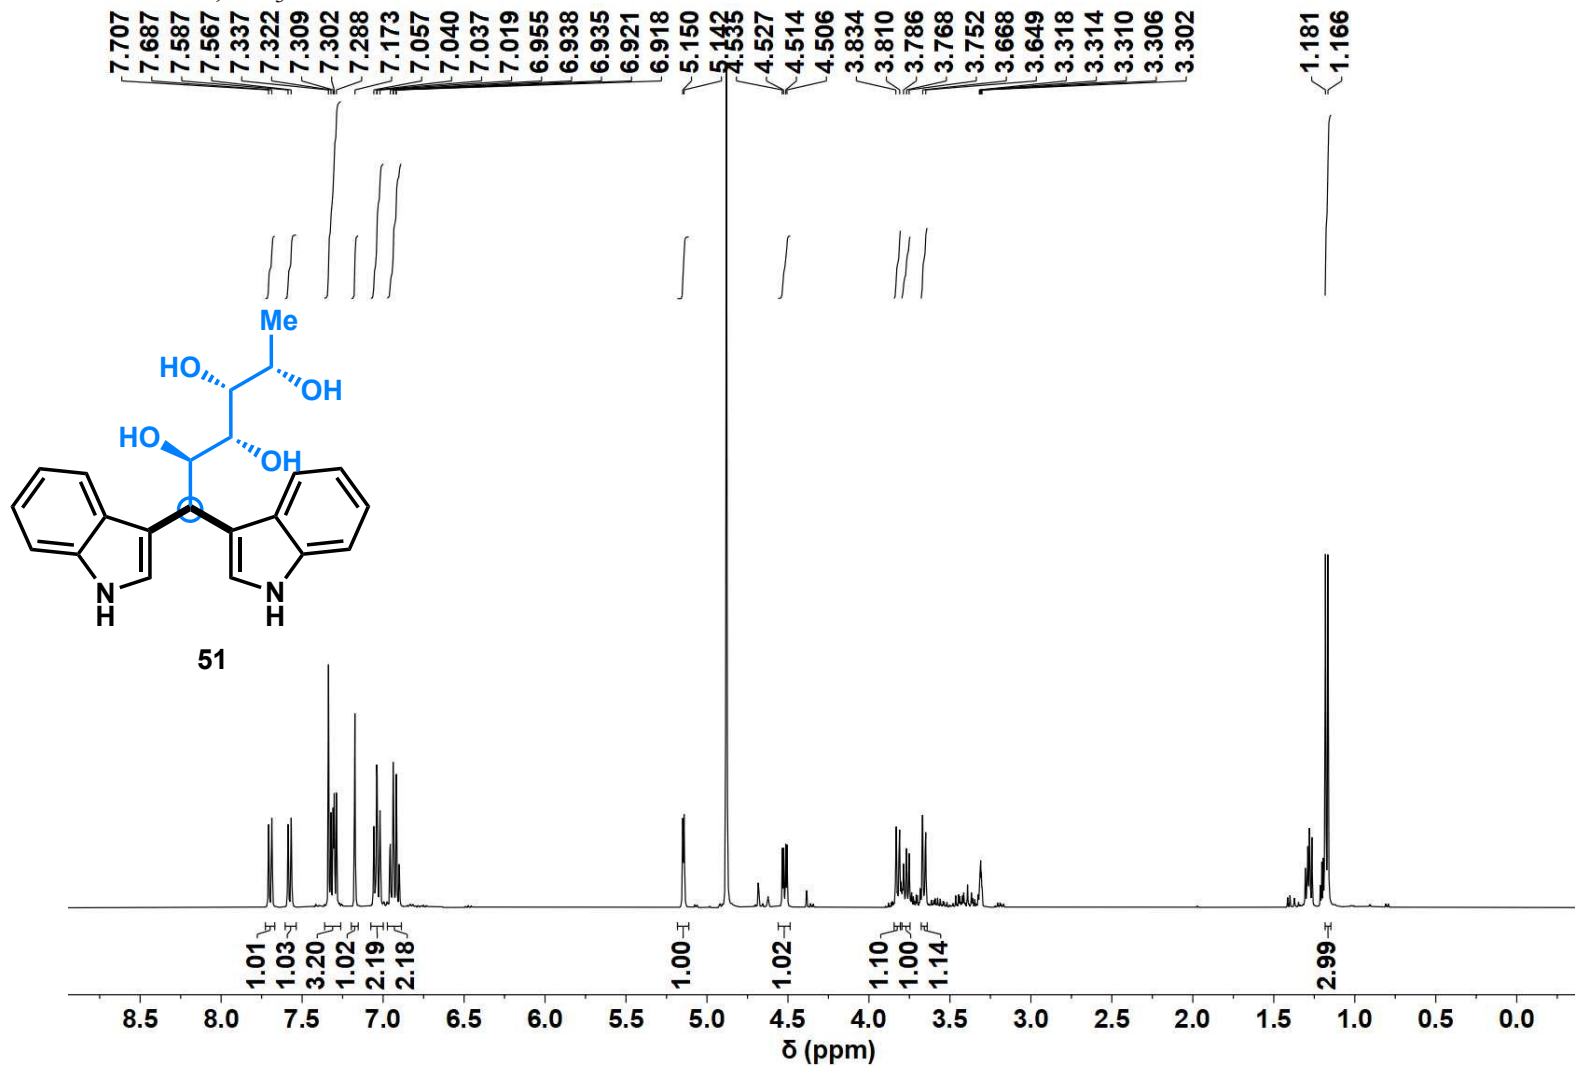

$^{13}\text{C}$  NMR 101 MHz,  $\text{CD}_3\text{OD}$

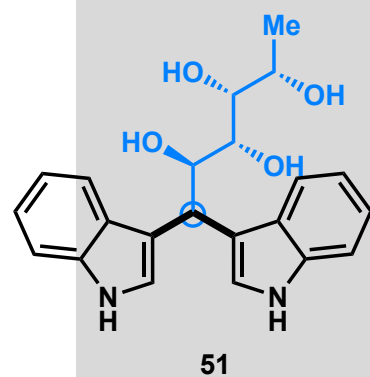

$^1\text{H}$  NMR 400 MHz,  $\text{CD}_3\text{OD}$

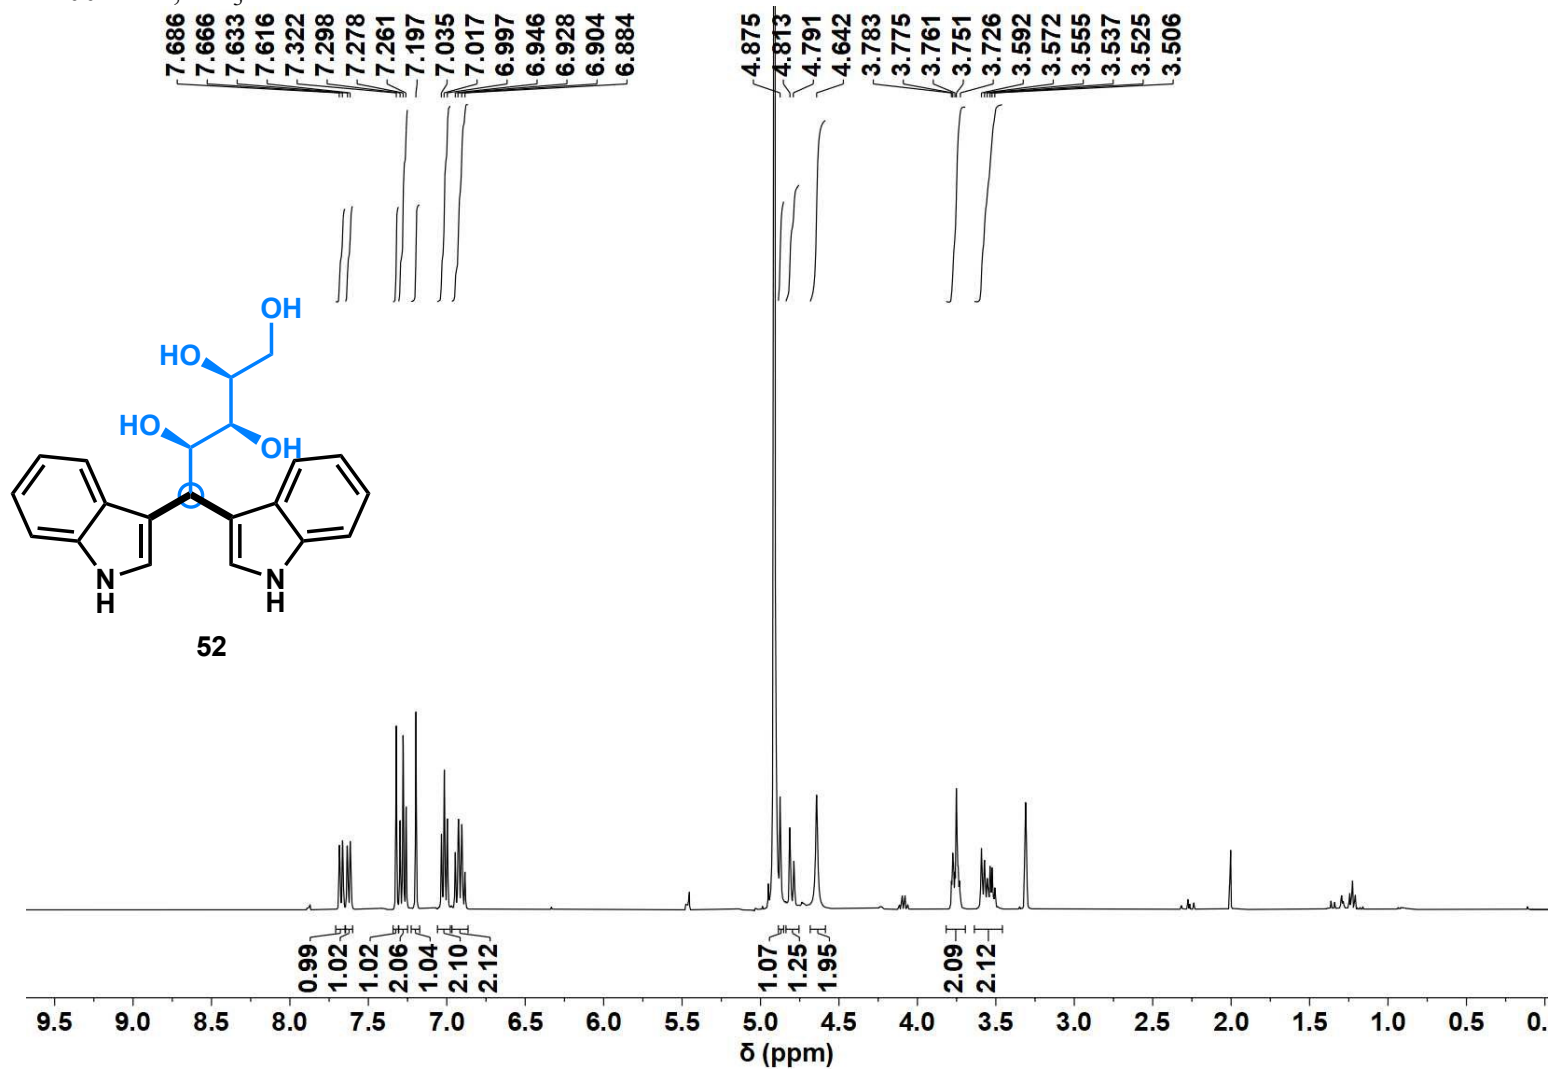

<sup>13</sup>C NMR 101 MHz, CD<sub>3</sub>OD

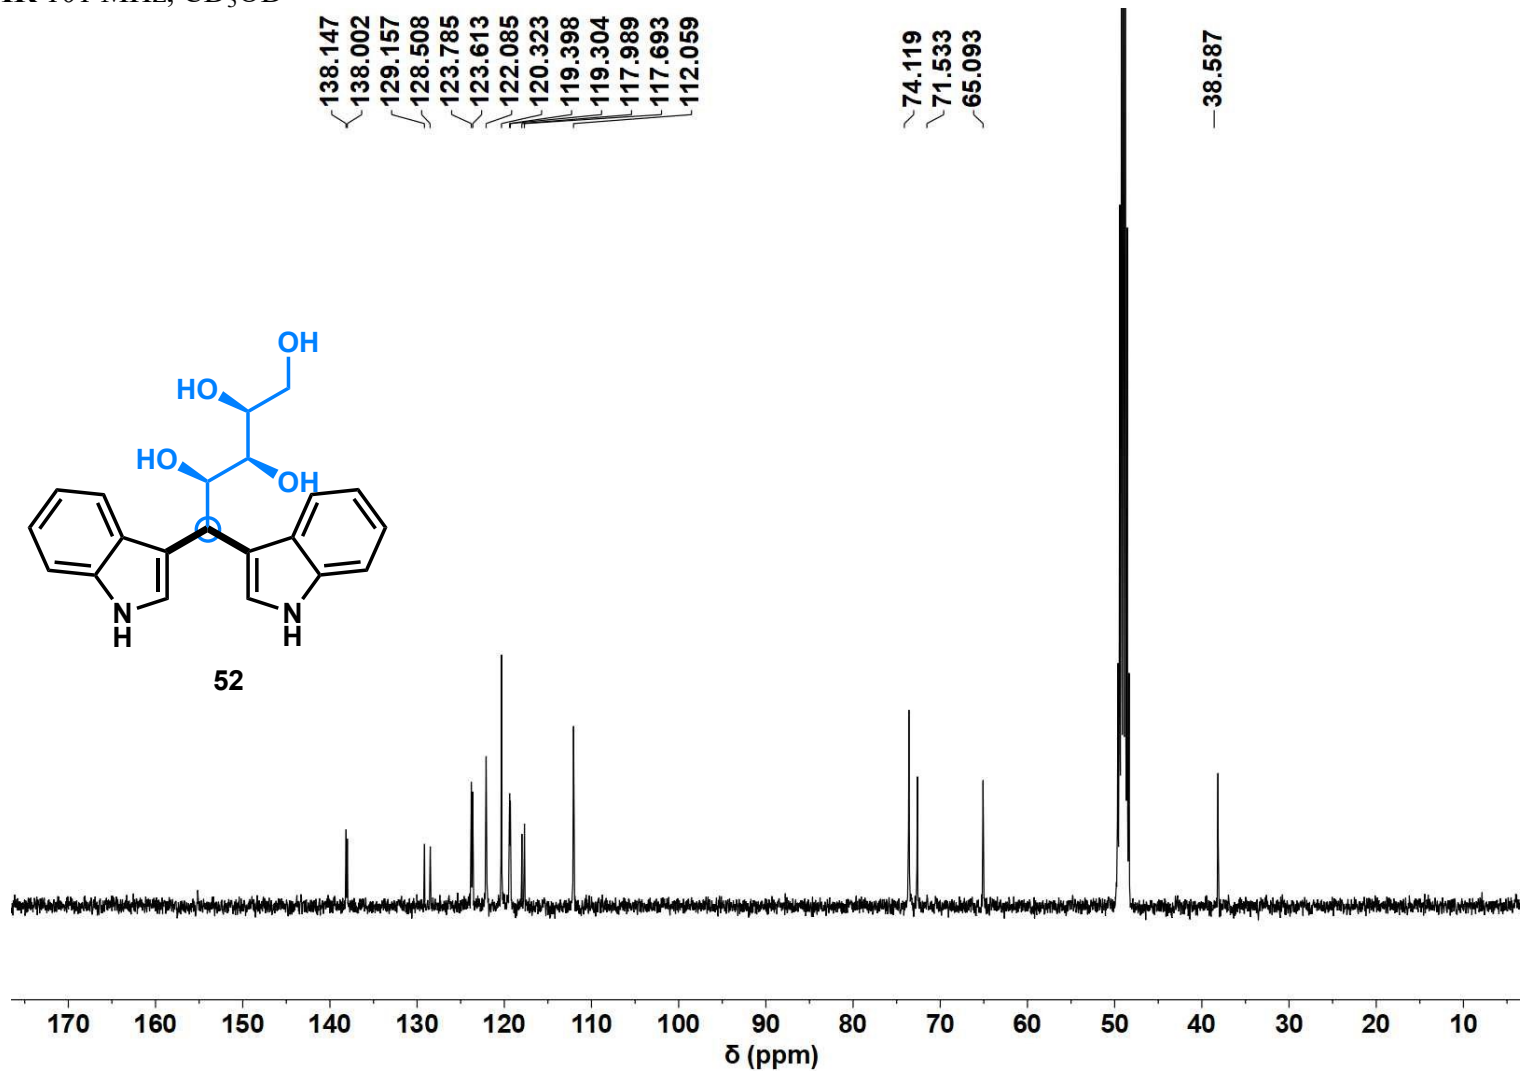

$^1\text{H}$  NMR 400 MHz,  $\text{CD}_3\text{OD}$

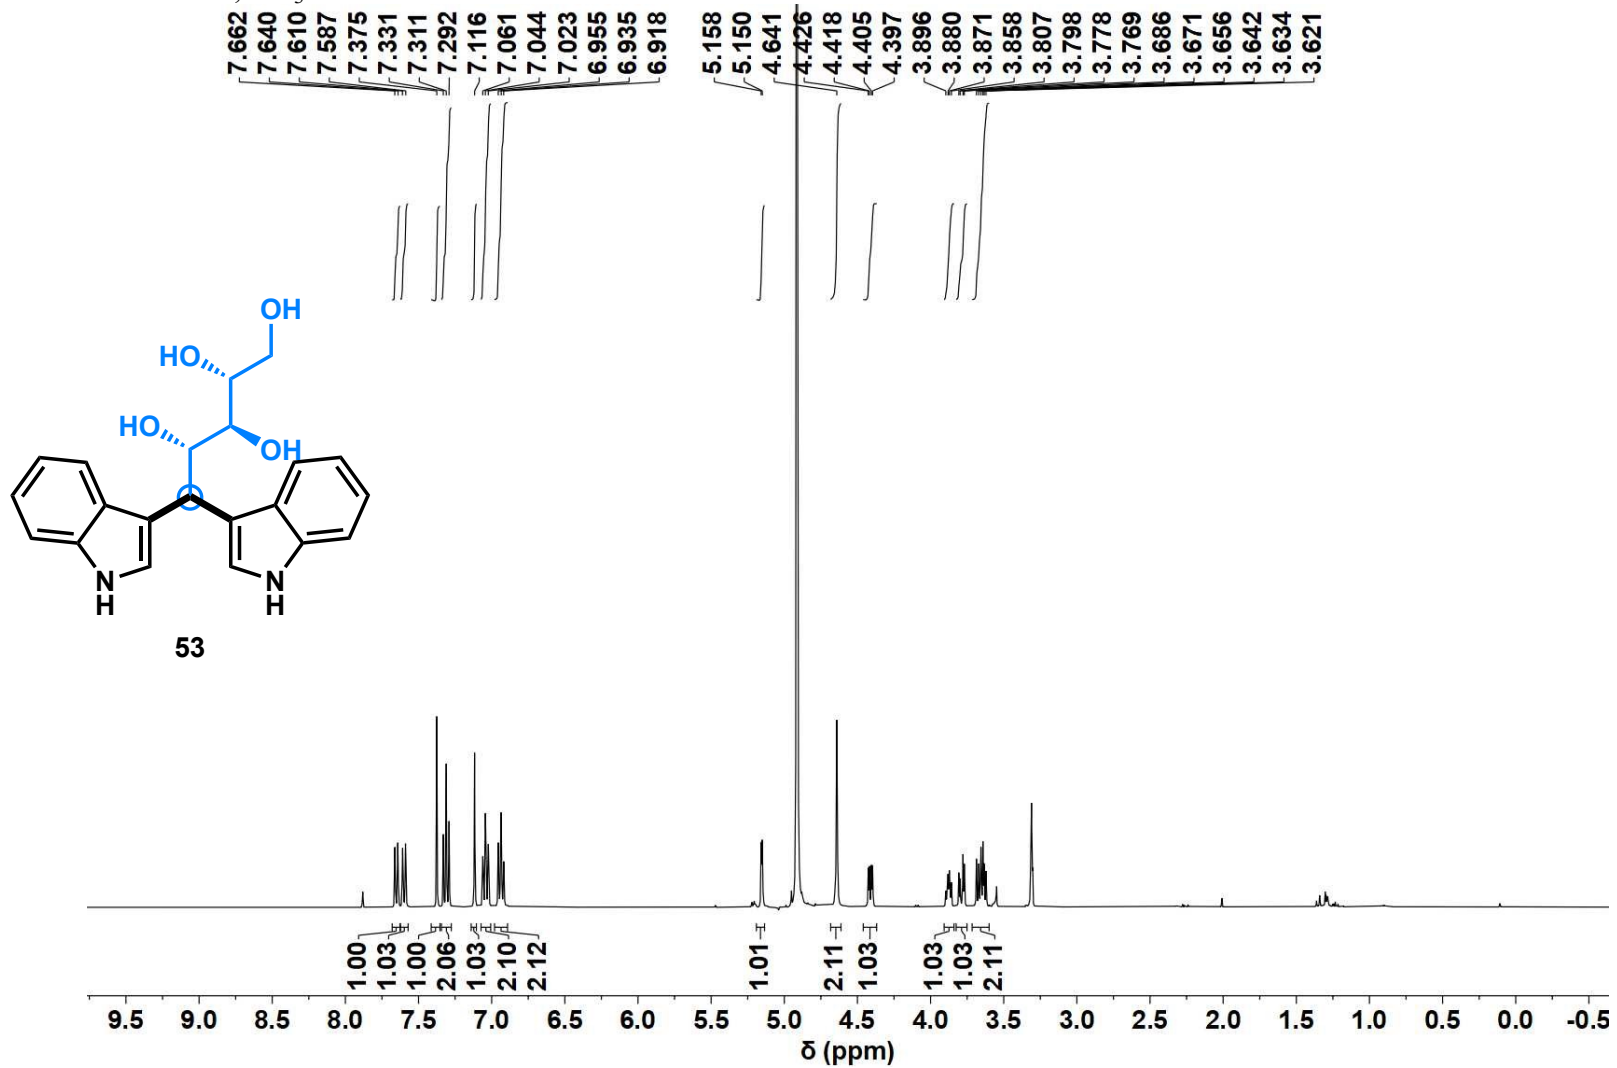

<sup>13</sup>C NMR 101 MHz, CD<sub>3</sub>OD

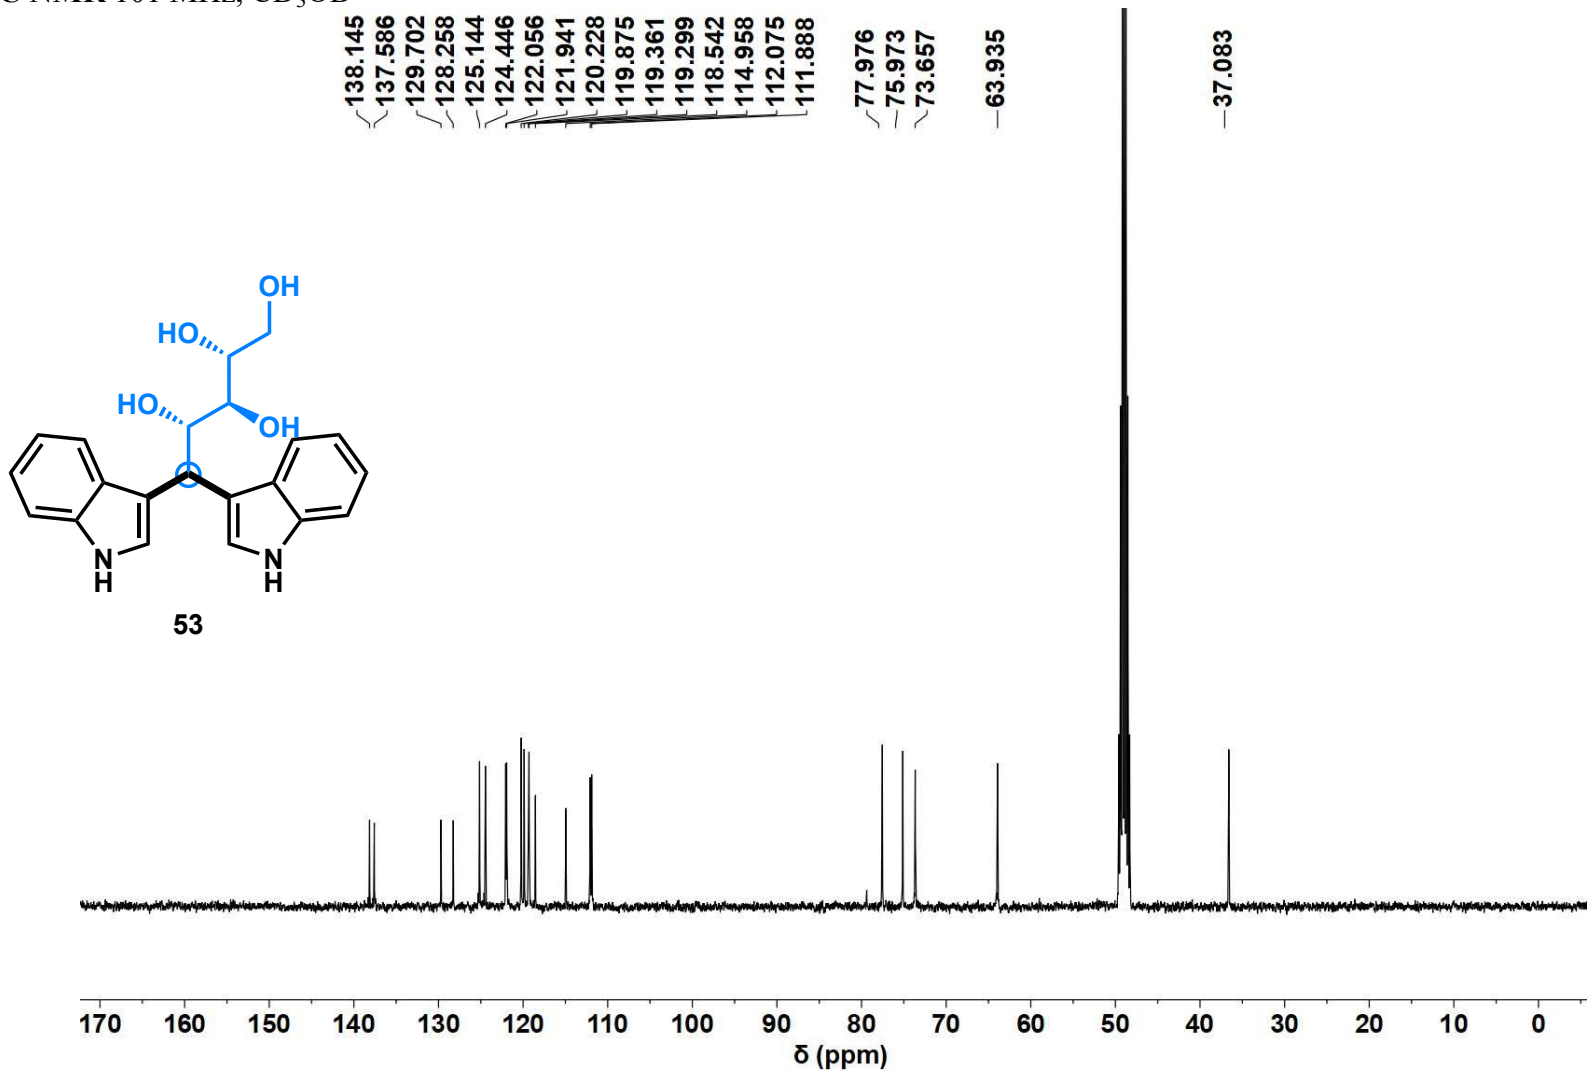

<sup>1</sup>H NMR 400 MHz, CD<sub>3</sub>OD

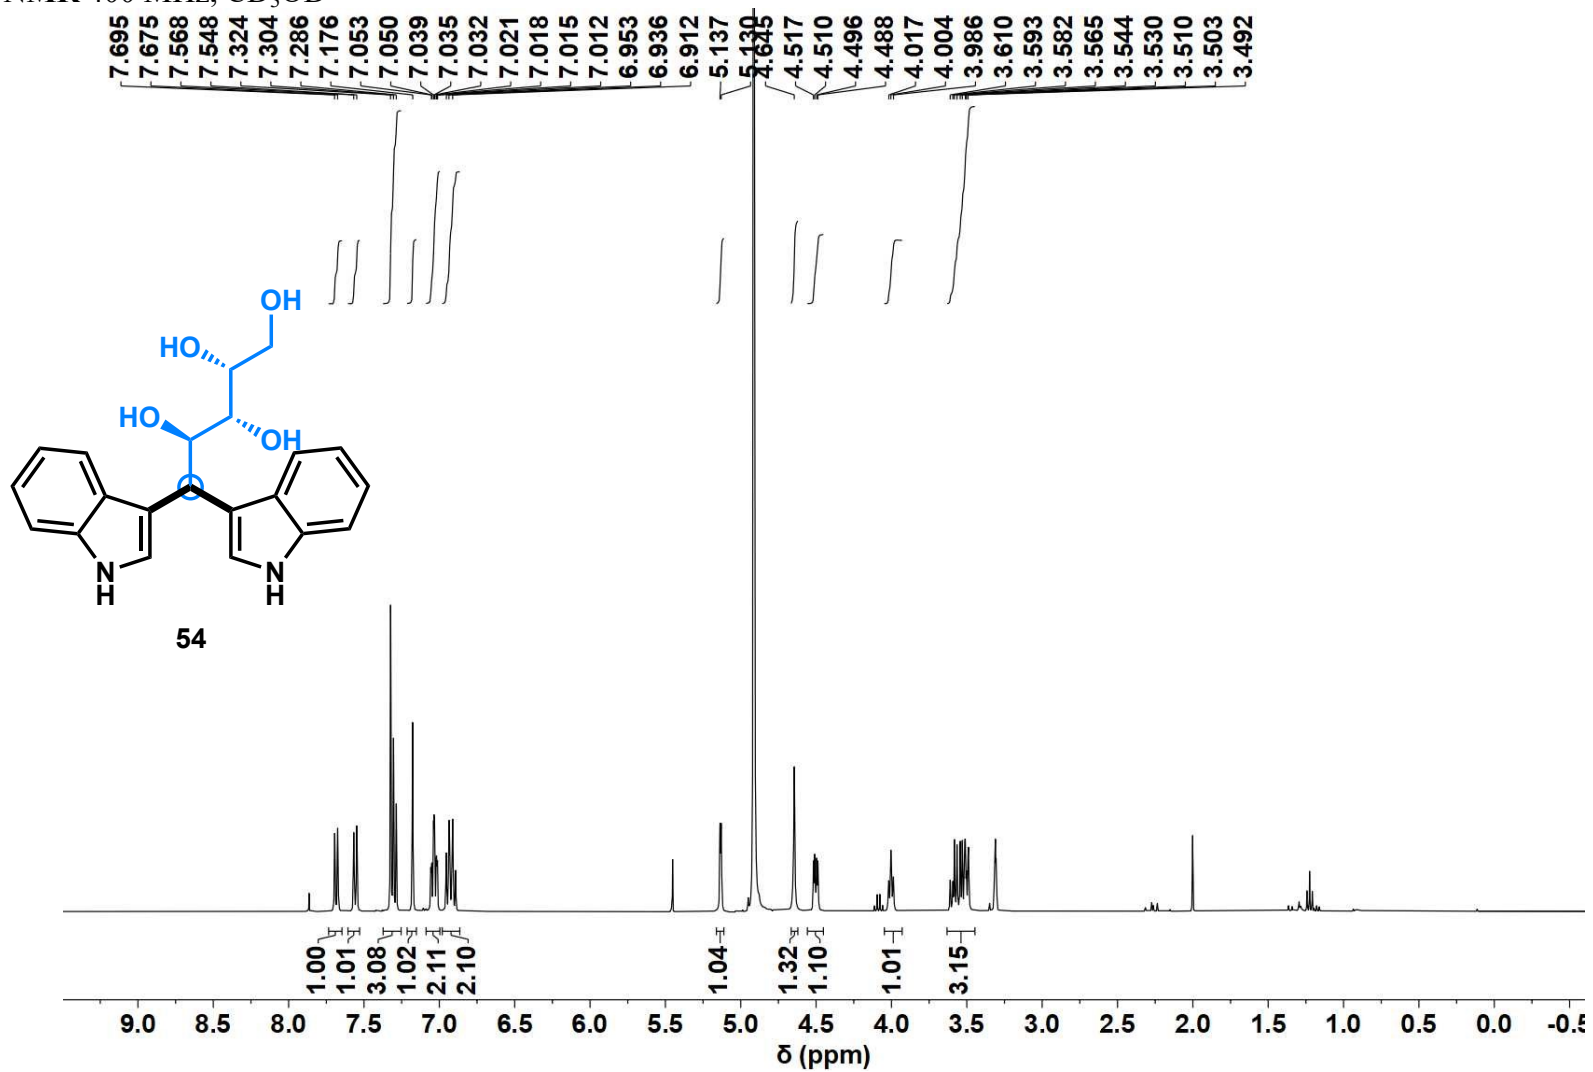



$^{13}\text{C}$  NMR 101 MHz,  $\text{CD}_3\text{OD}$

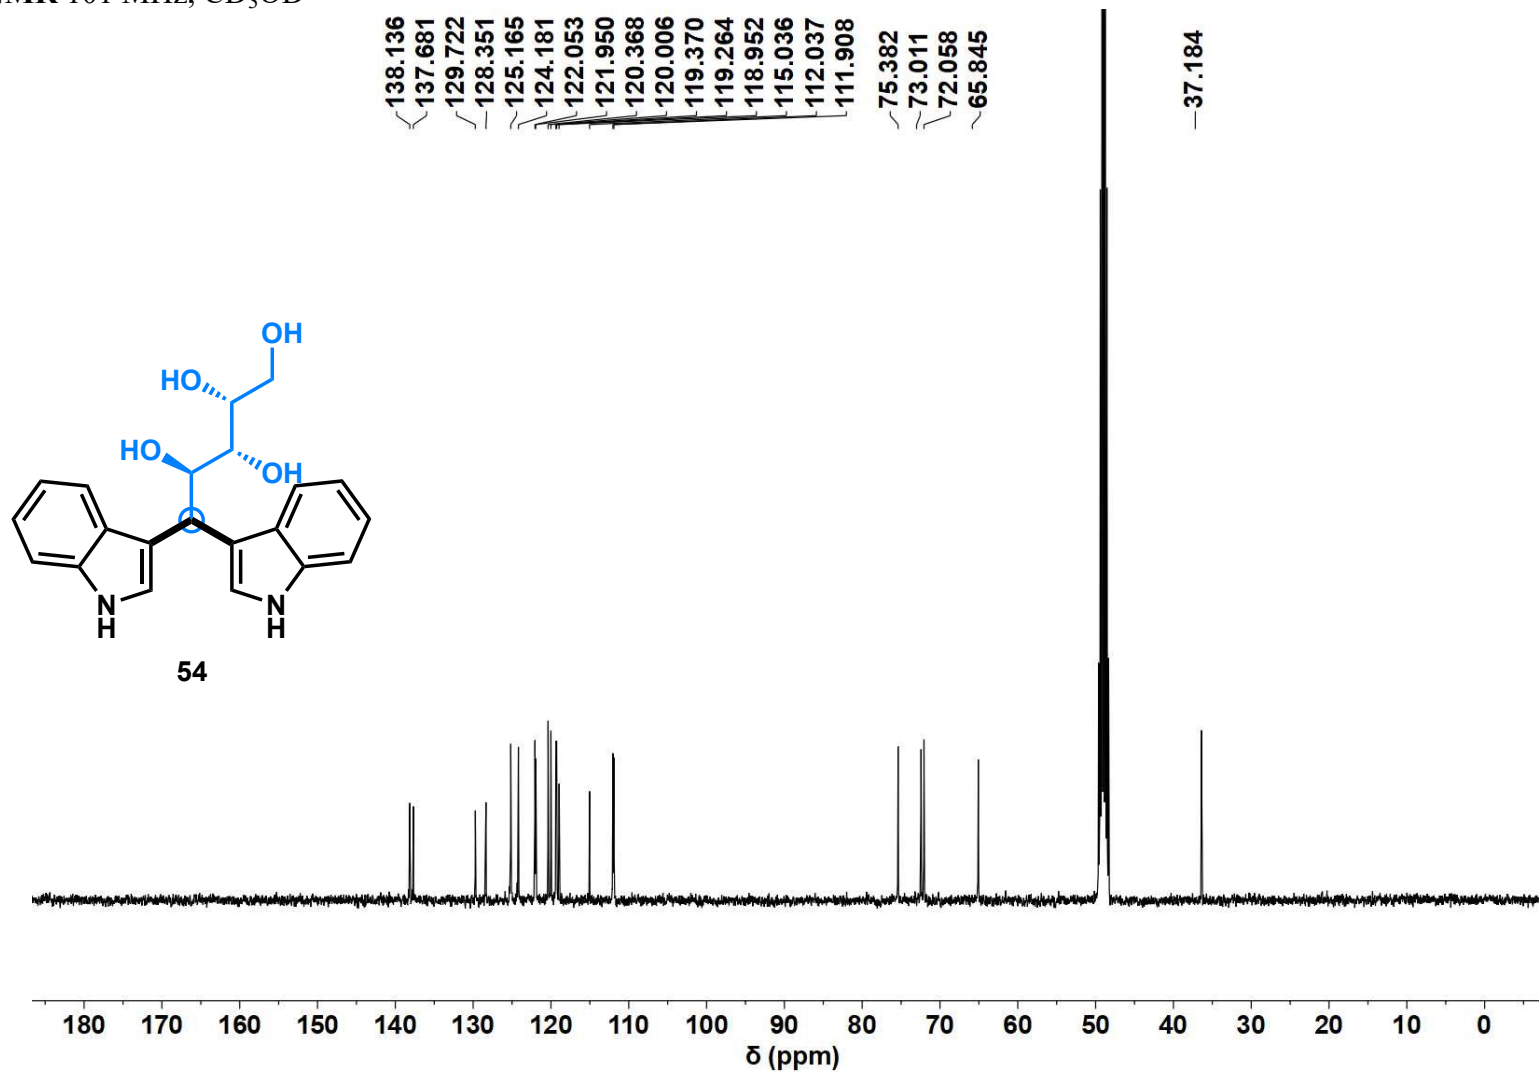

<sup>1</sup>H NMR 400 MHz, CD<sub>3</sub>OD

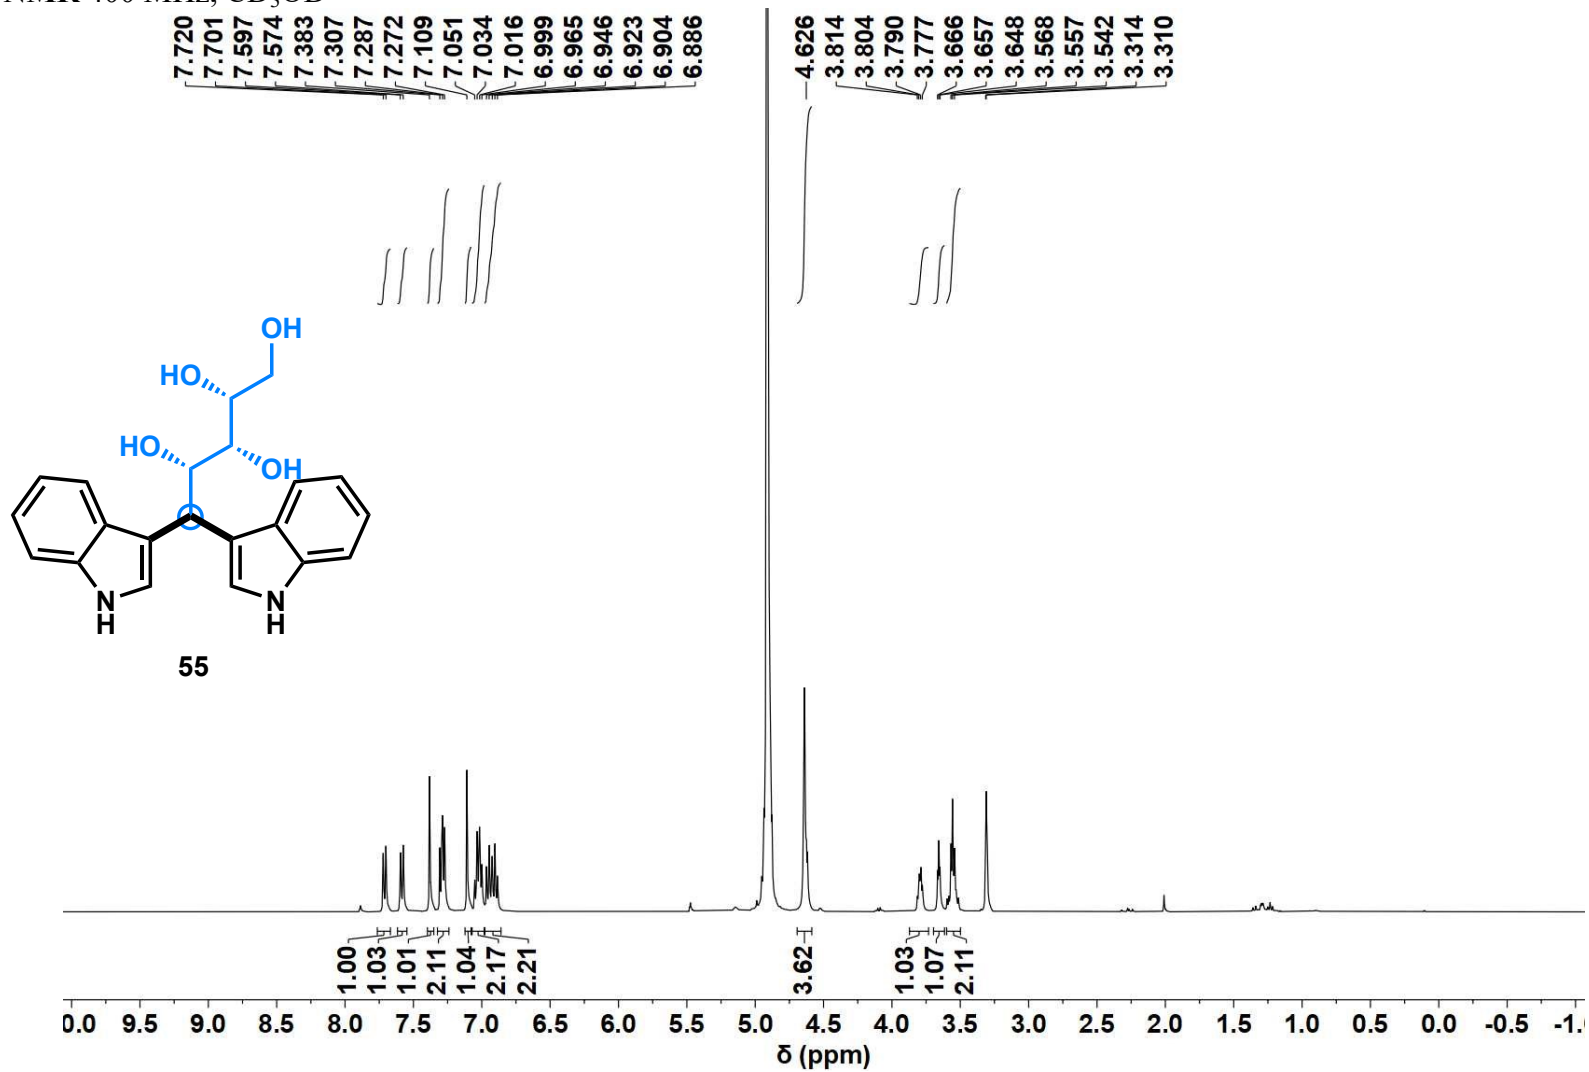

$^{13}\text{C}$  NMR 101 MHz,  $\text{CD}_3\text{OD}$

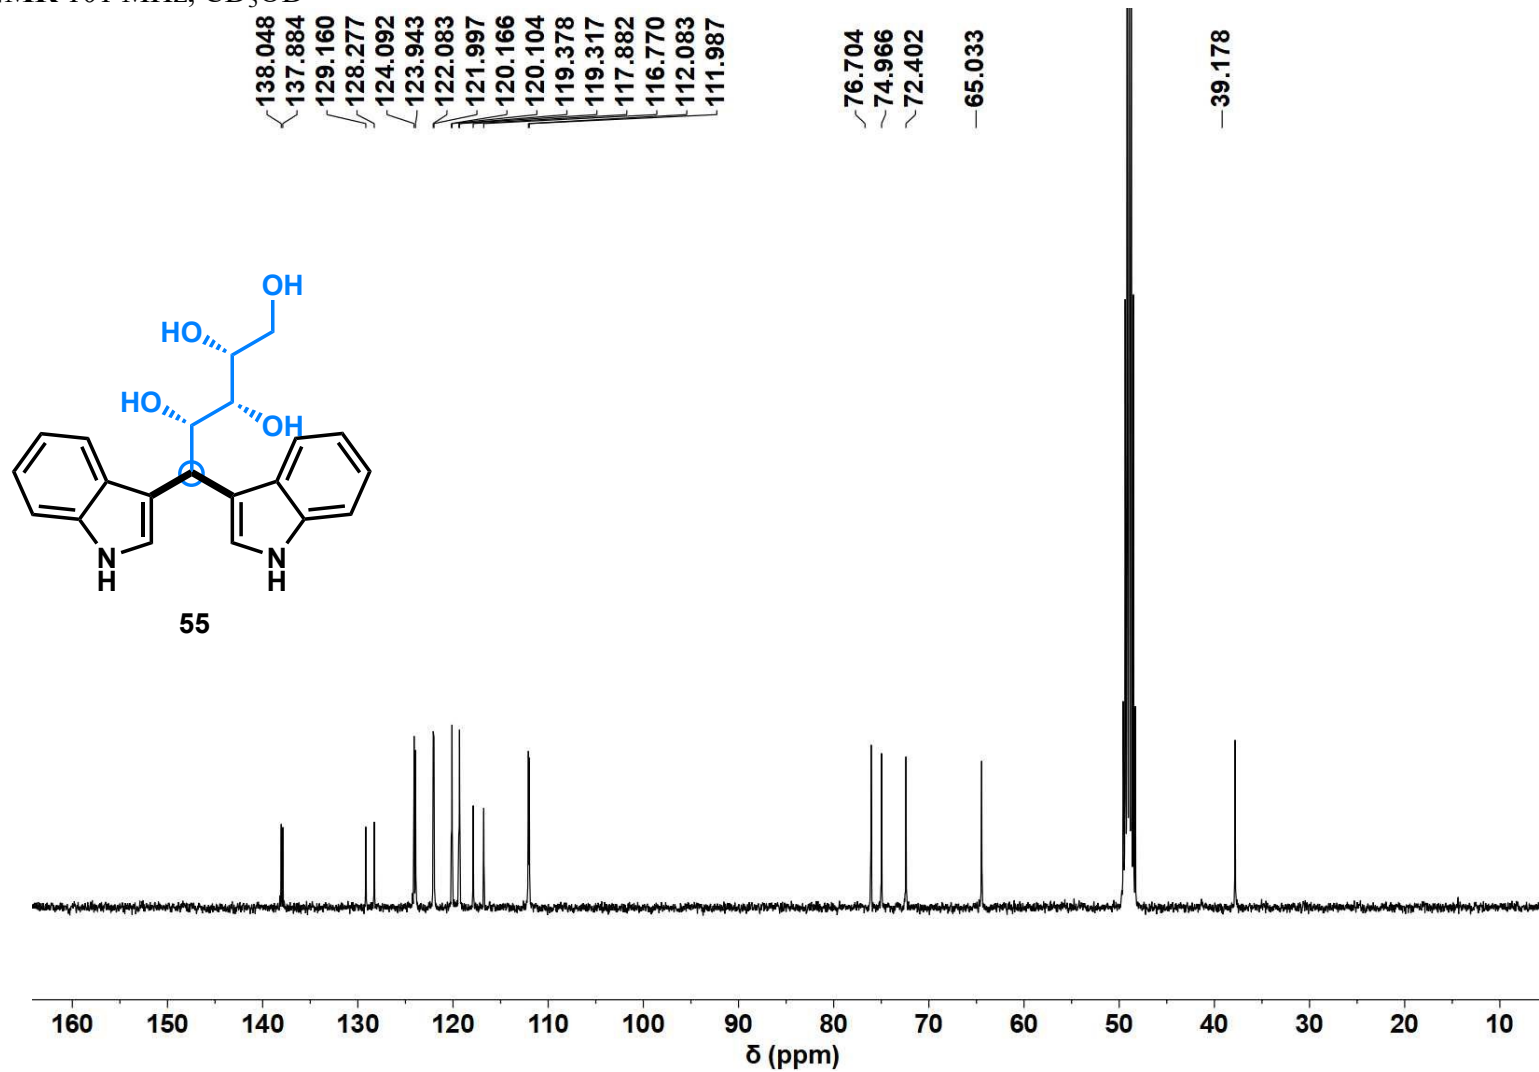

$^1\text{H}$  NMR 400 MHz,  $\text{CDCl}_3$

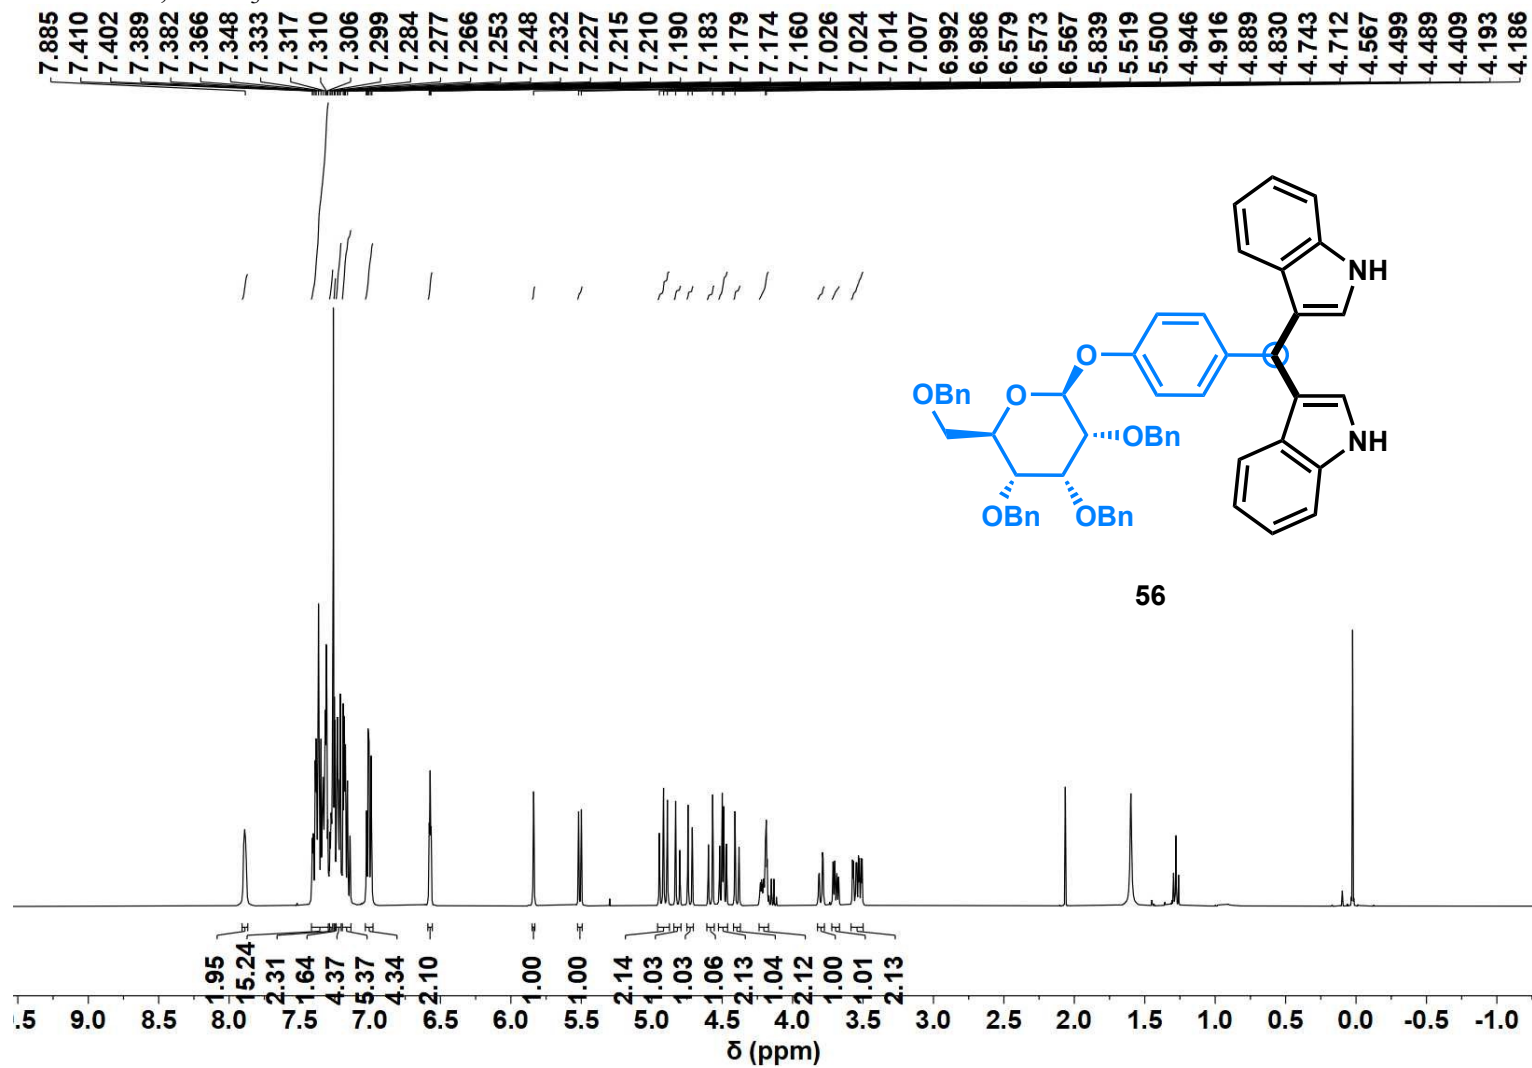

$^{13}\text{C}$  NMR 101 MHz,  $\text{CDCl}_3$

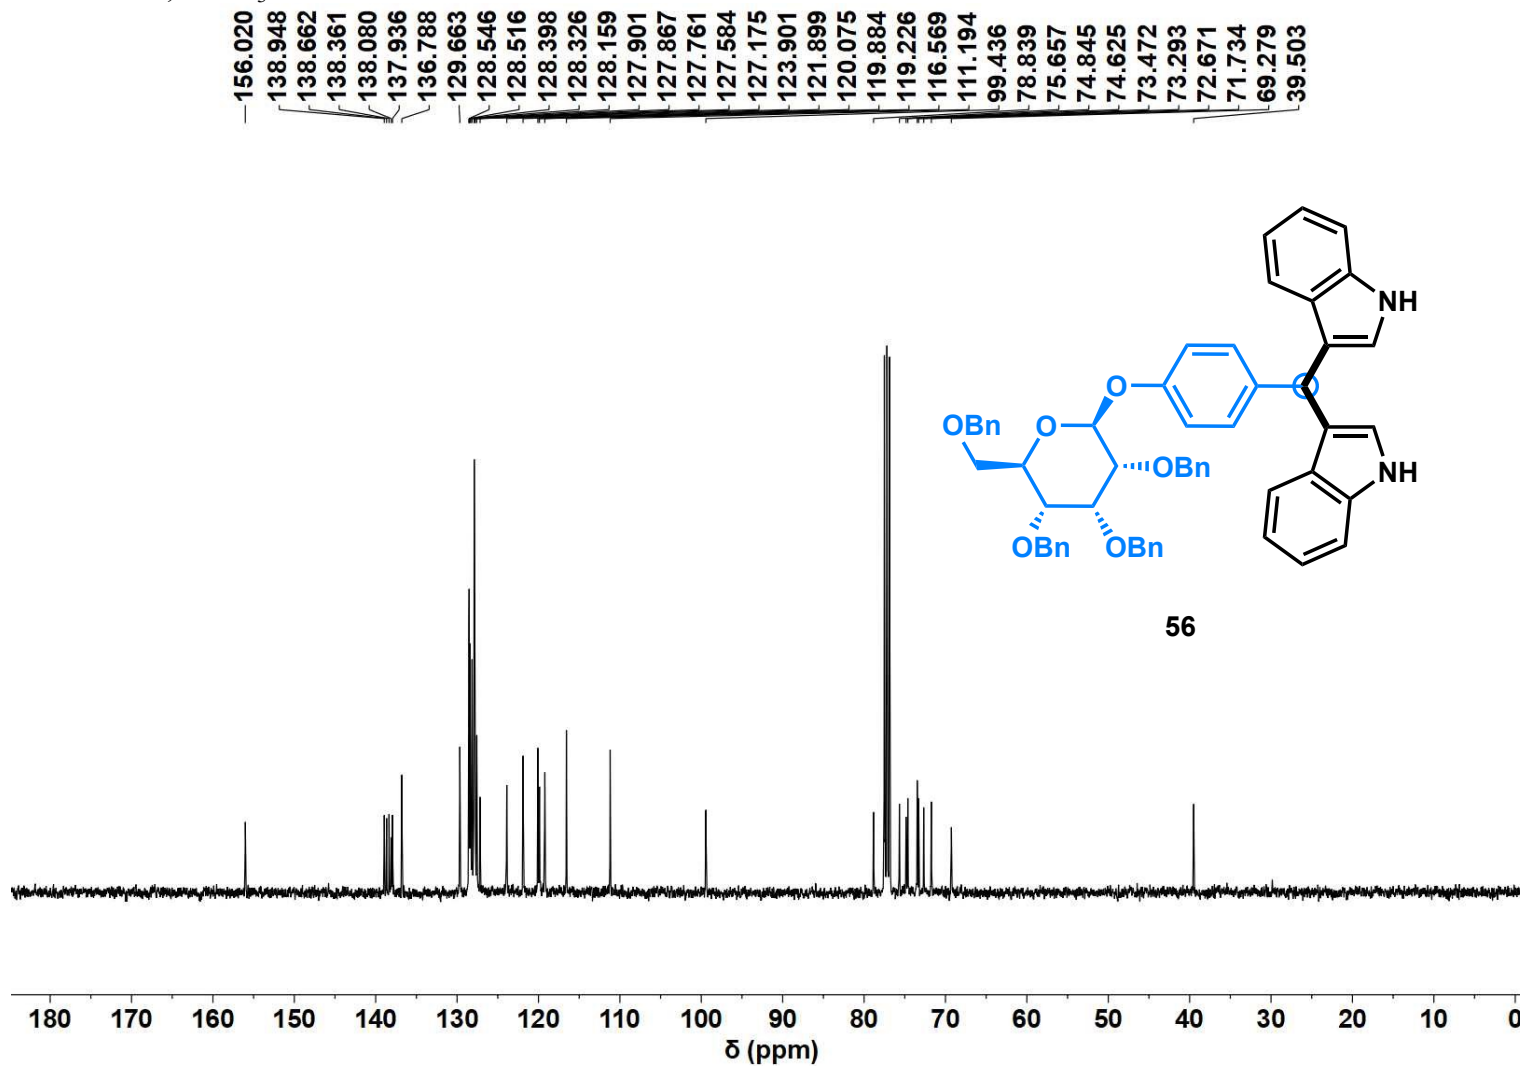

<sup>1</sup>H NMR 400 MHz, CDCl<sub>3</sub>

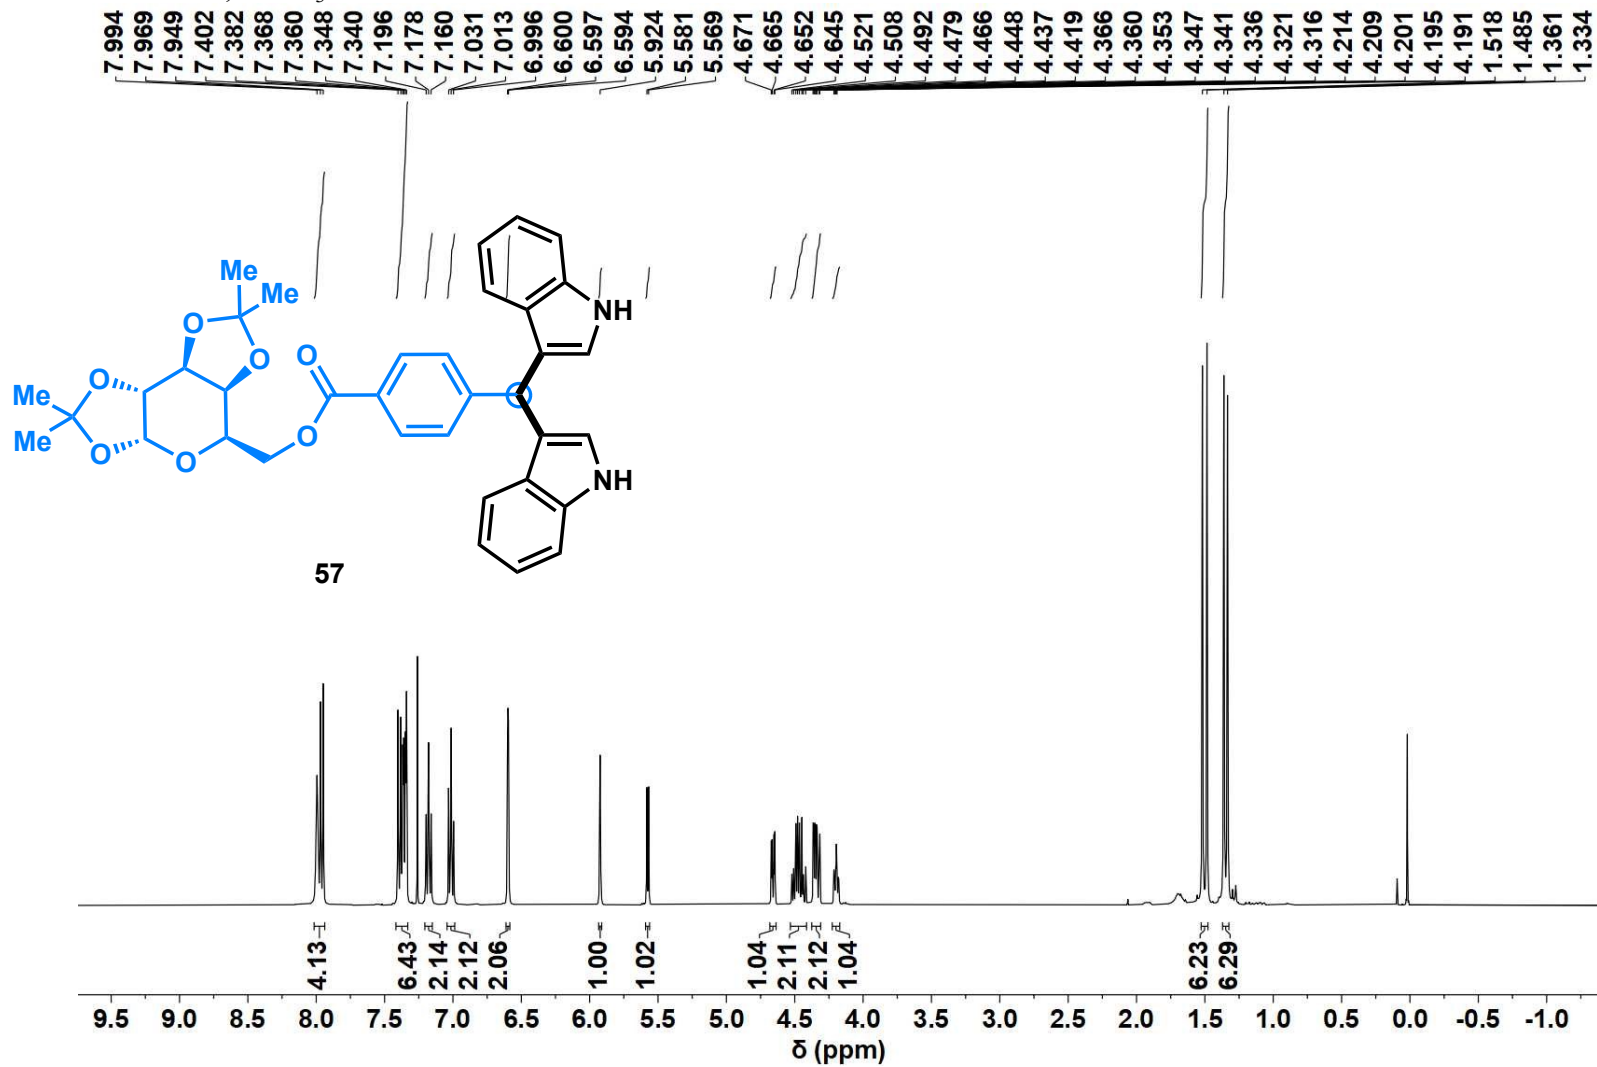

$^{13}\text{C}$  NMR 101 MHz,  $\text{CDCl}_3$

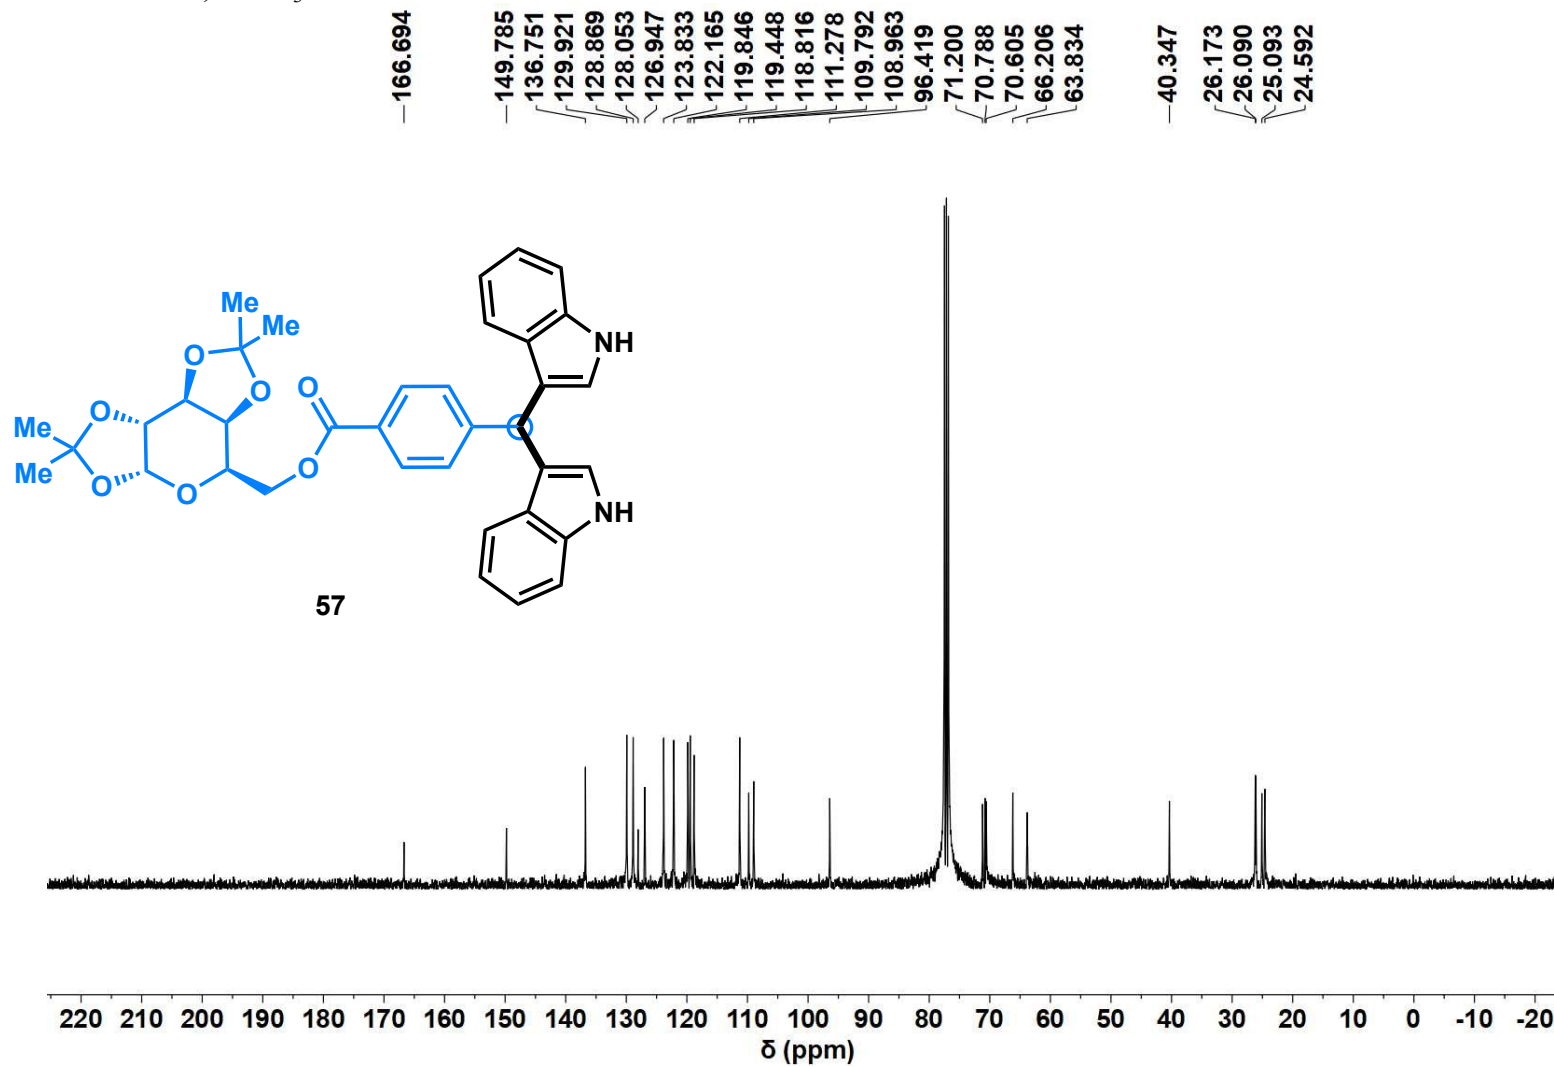

$^1\text{H}$  NMR 400 MHz,  $\text{CDCl}_3$

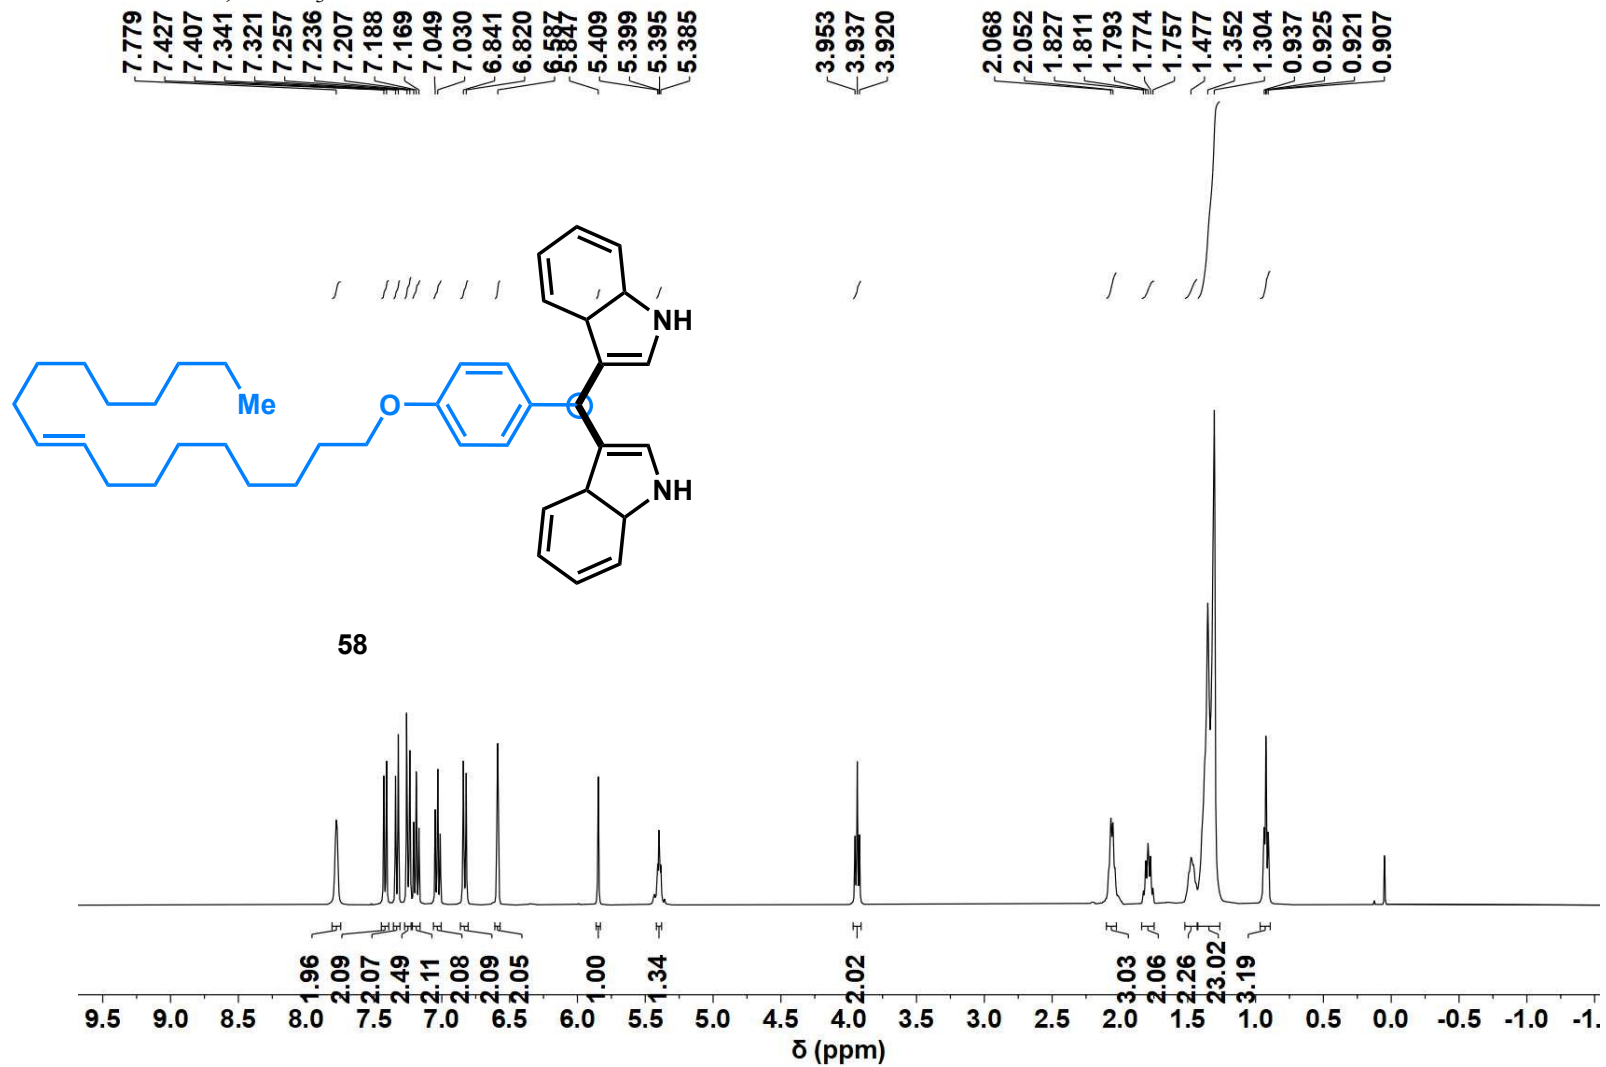



$^{13}\text{C}$  NMR 101 MHz,  $\text{CDCl}_3$

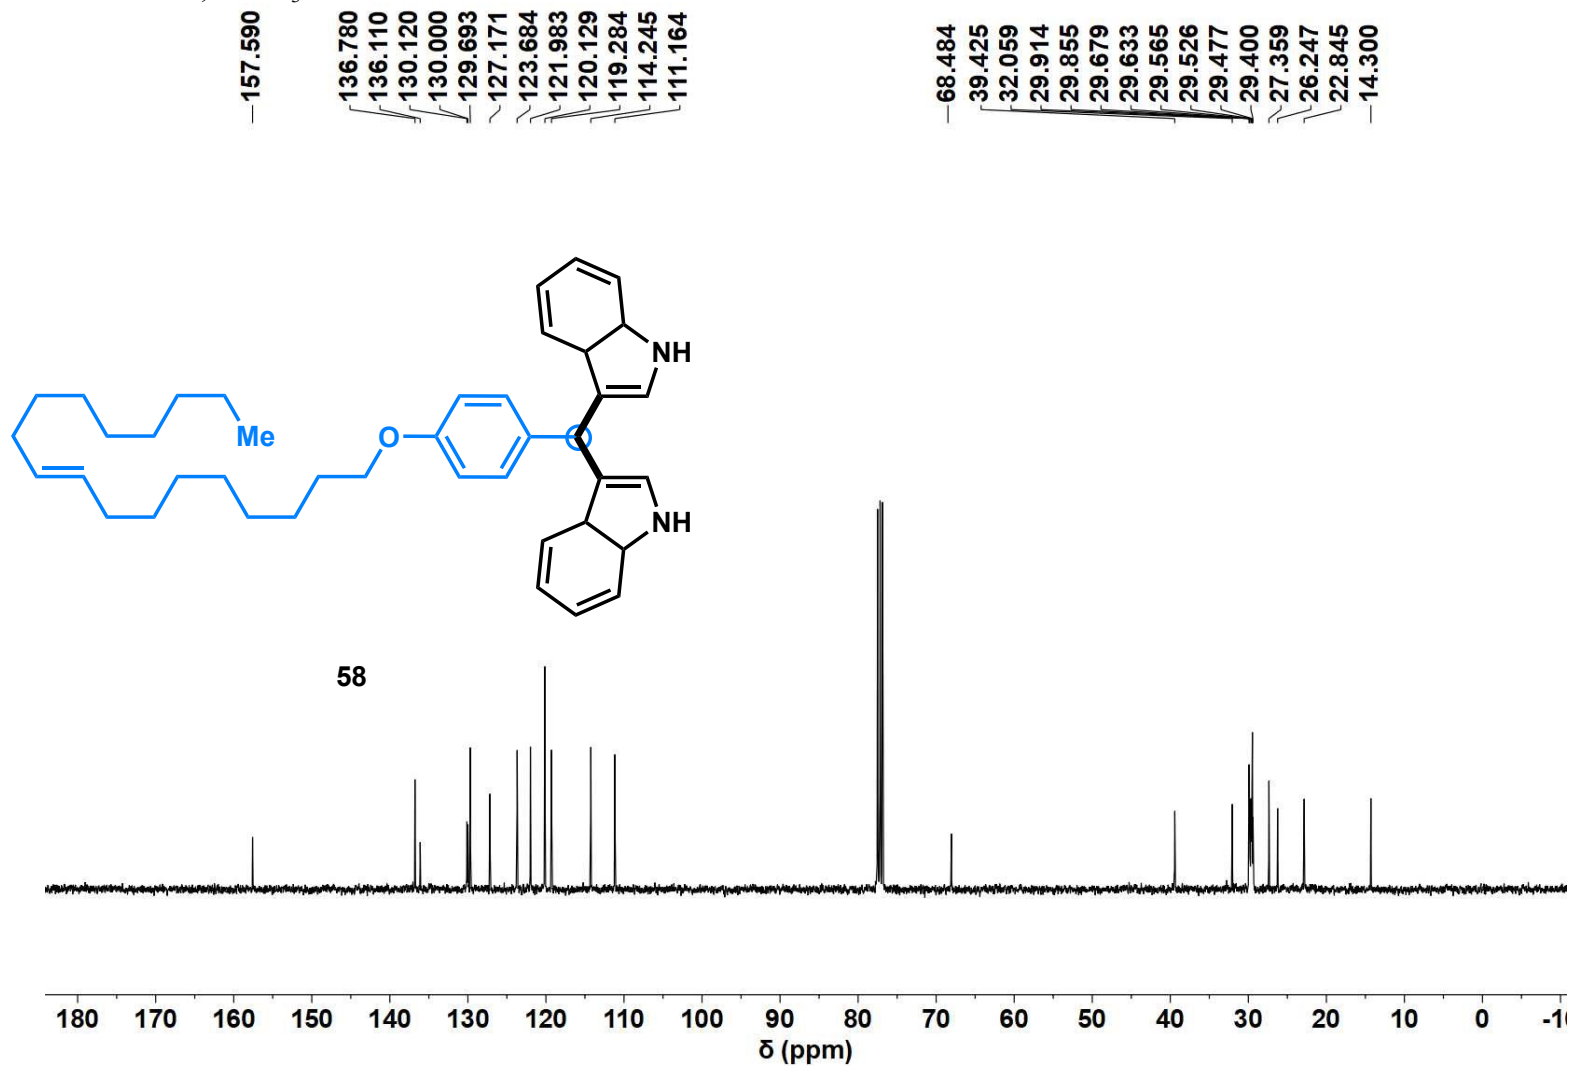

<sup>1</sup>H NMR 400 MHz, CDCl<sub>3</sub>

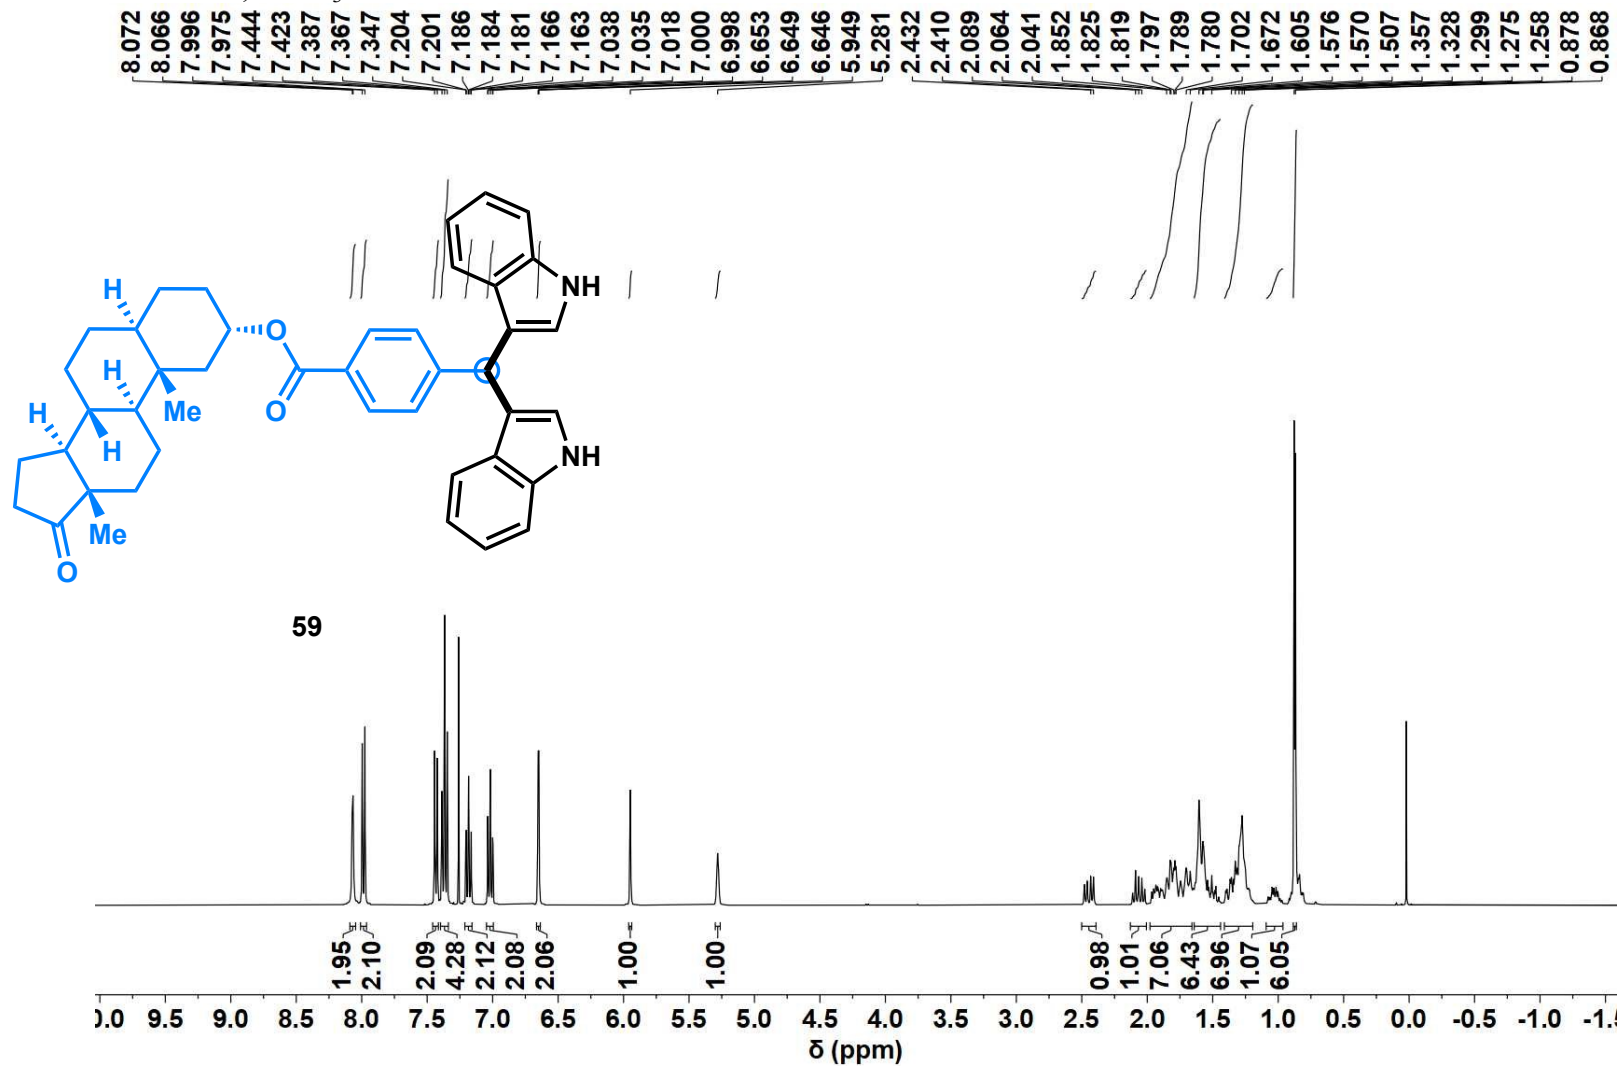

$^{13}\text{C}$  NMR 101 MHz,  $\text{CDCl}_3$

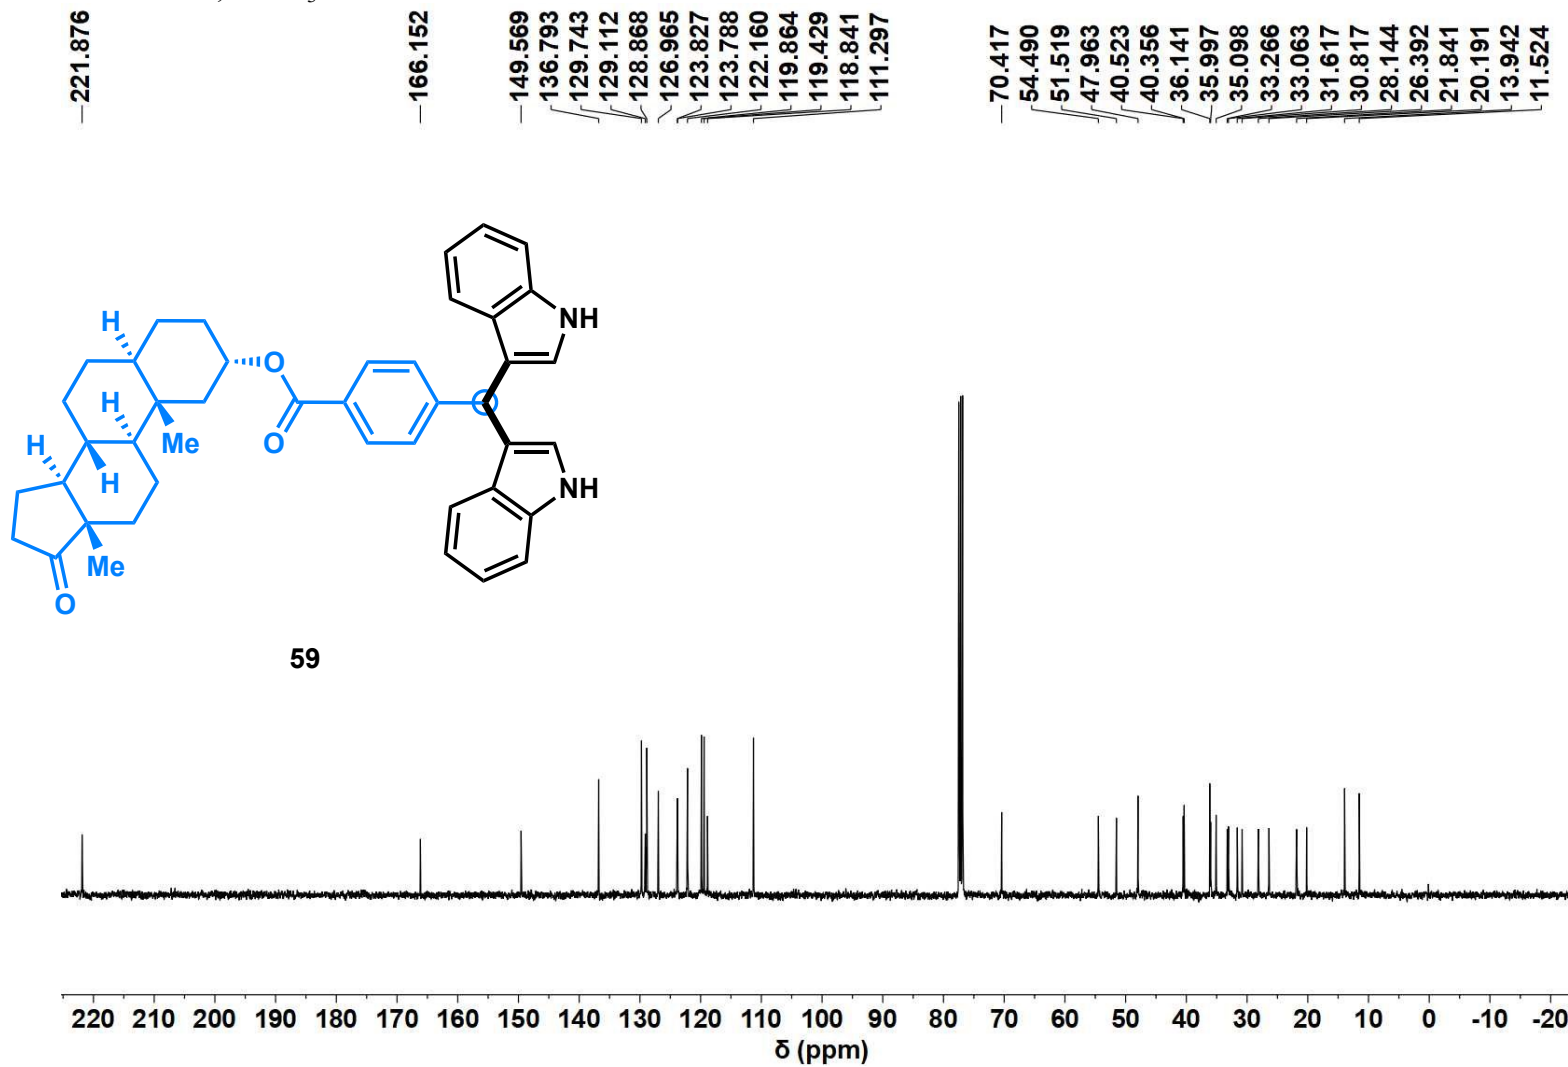

$^1\text{H}$  NMR 400 MHz,  $\text{DMSO-}d_6$

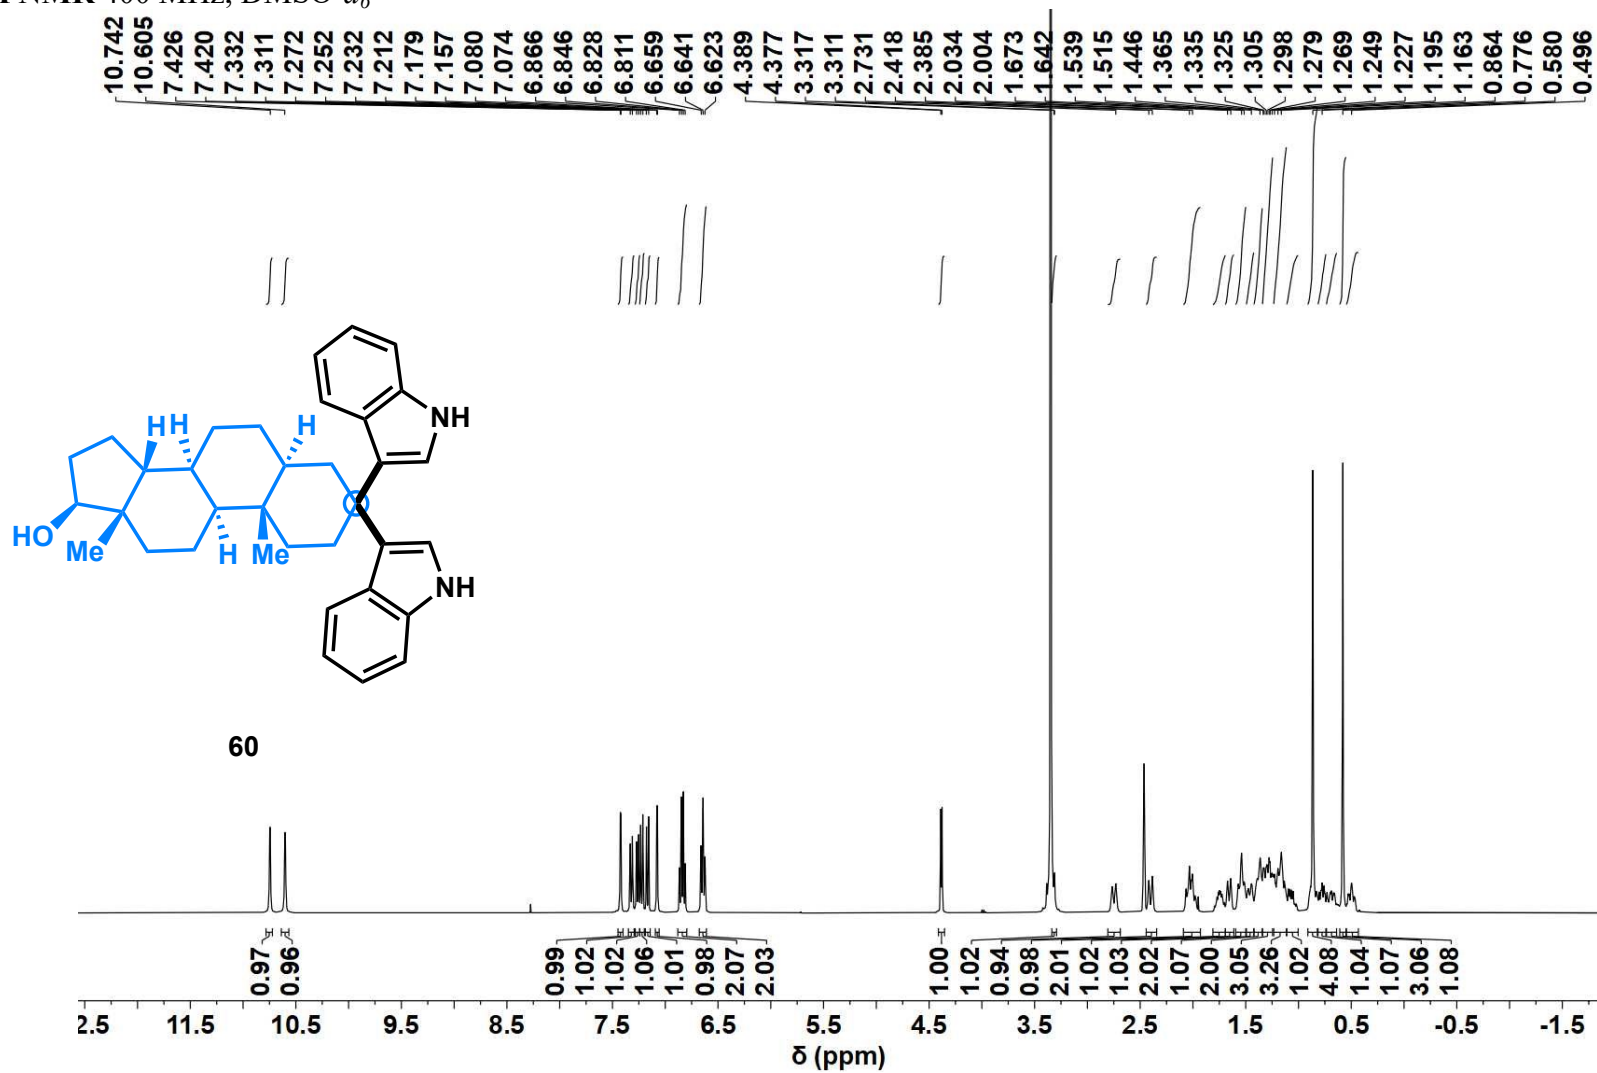

$^{13}\text{C}$  NMR 101 MHz,  $\text{DMSO-}d_6$

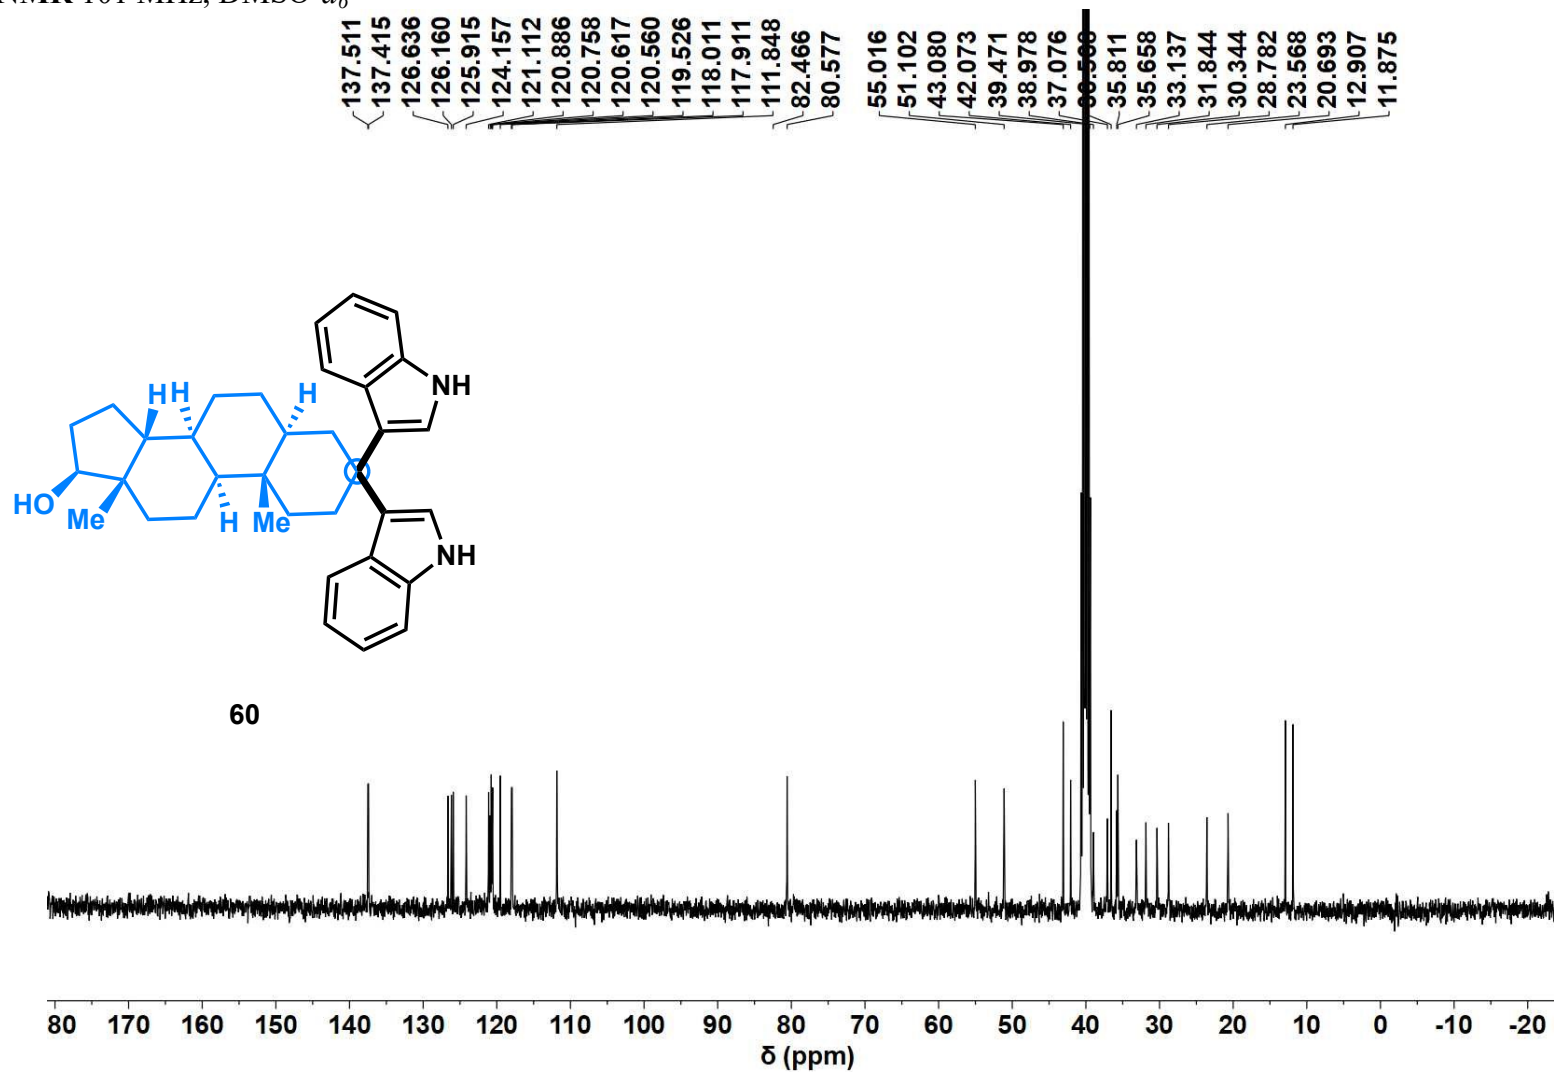

<sup>1</sup>H NMR 400 MHz, CDCl<sub>3</sub>

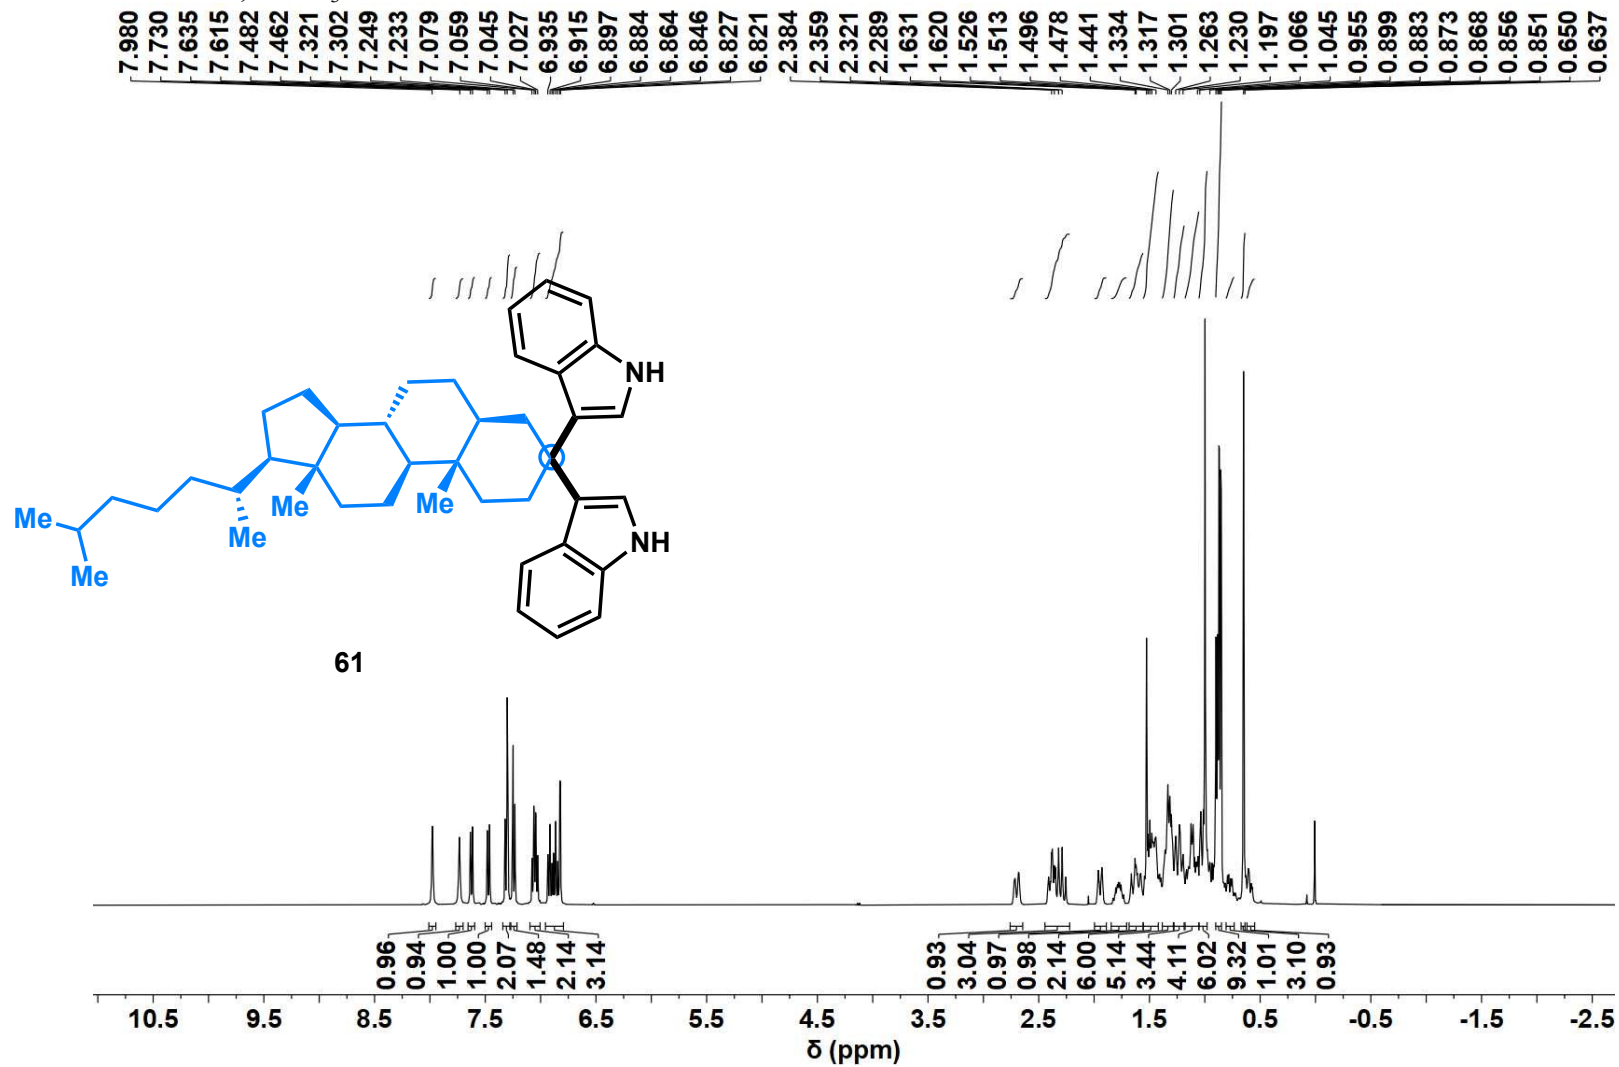

$^{13}\text{C}$  NMR 101 MHz,  $\text{CDCl}_3$

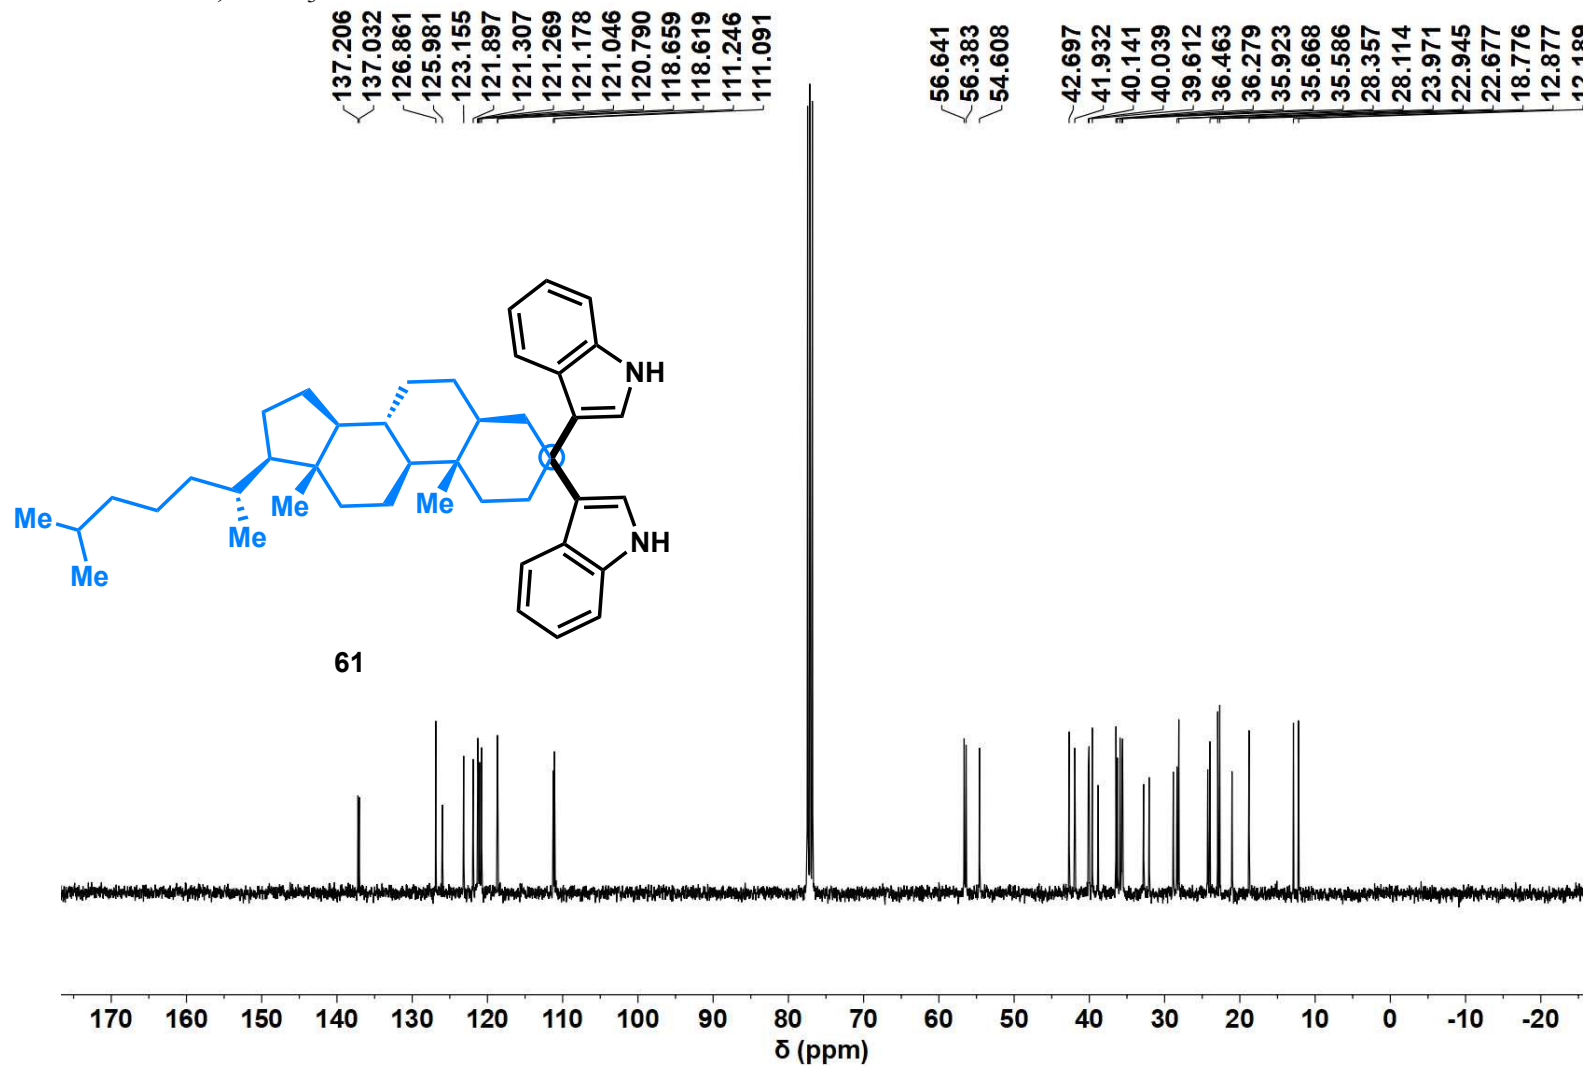

<sup>1</sup>H NMR 400 MHz, CDCl<sub>3</sub>

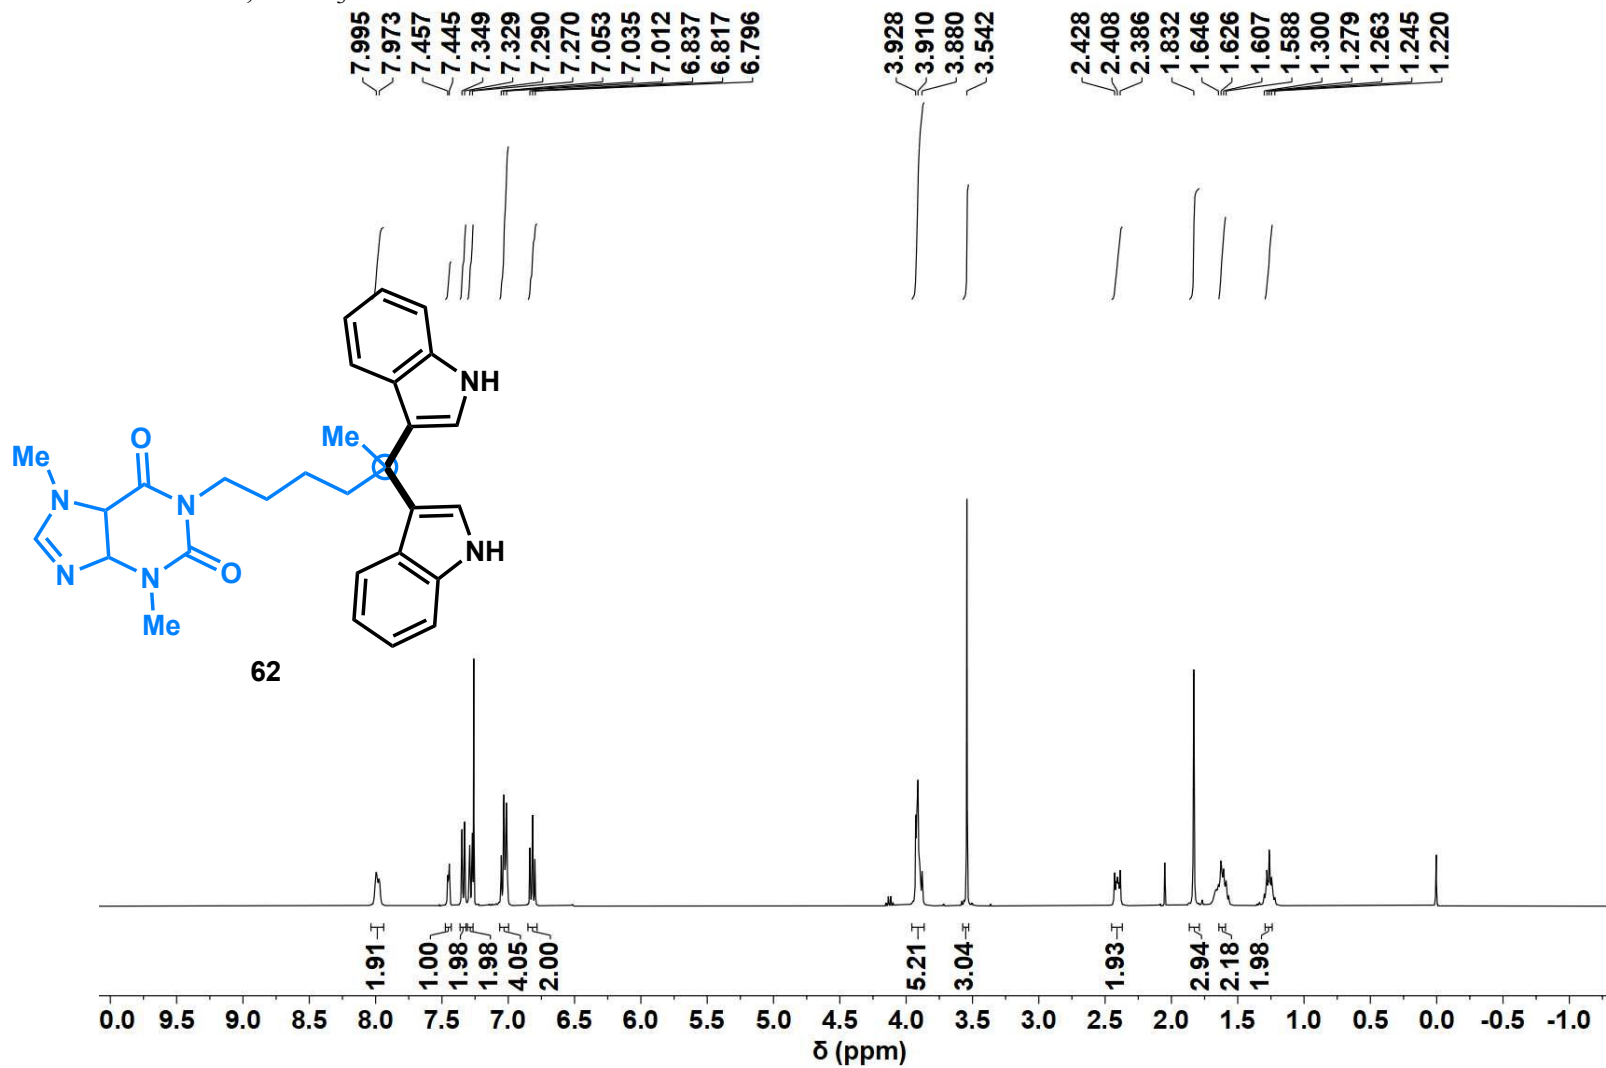



$^{13}\text{C}$  NMR 101 MHz,  $\text{CDCl}_3$

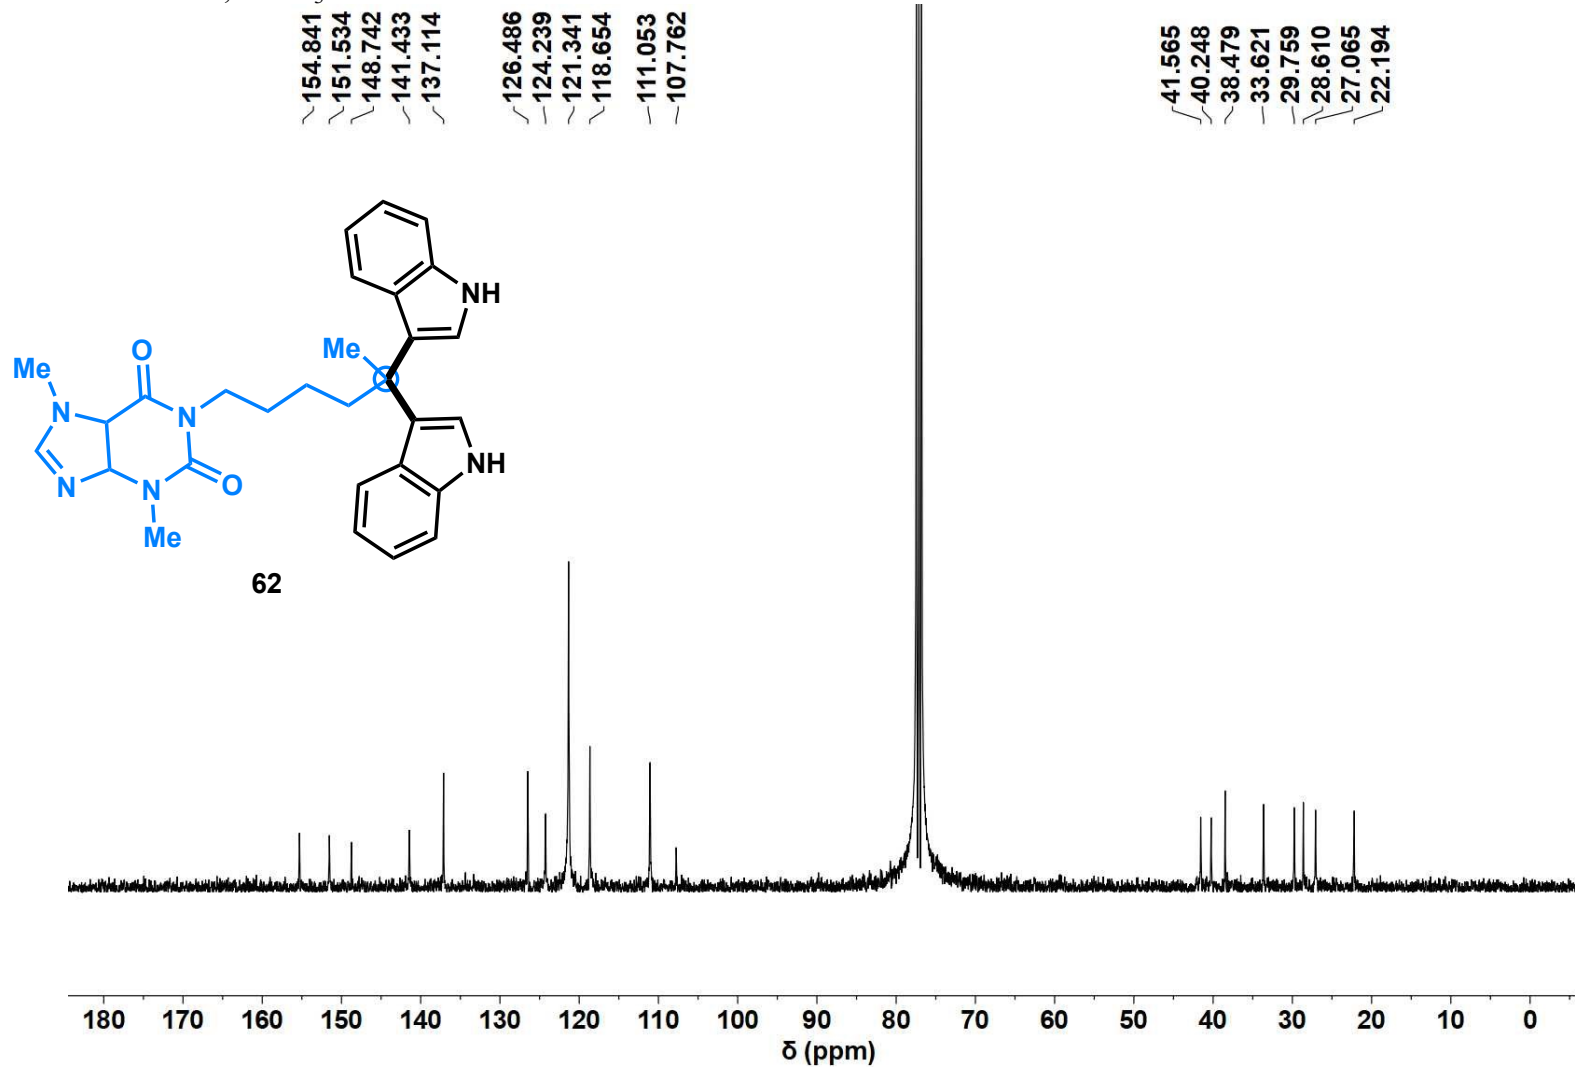

$^1\text{H}$  NMR 400 MHz,  $\text{CDCl}_3$

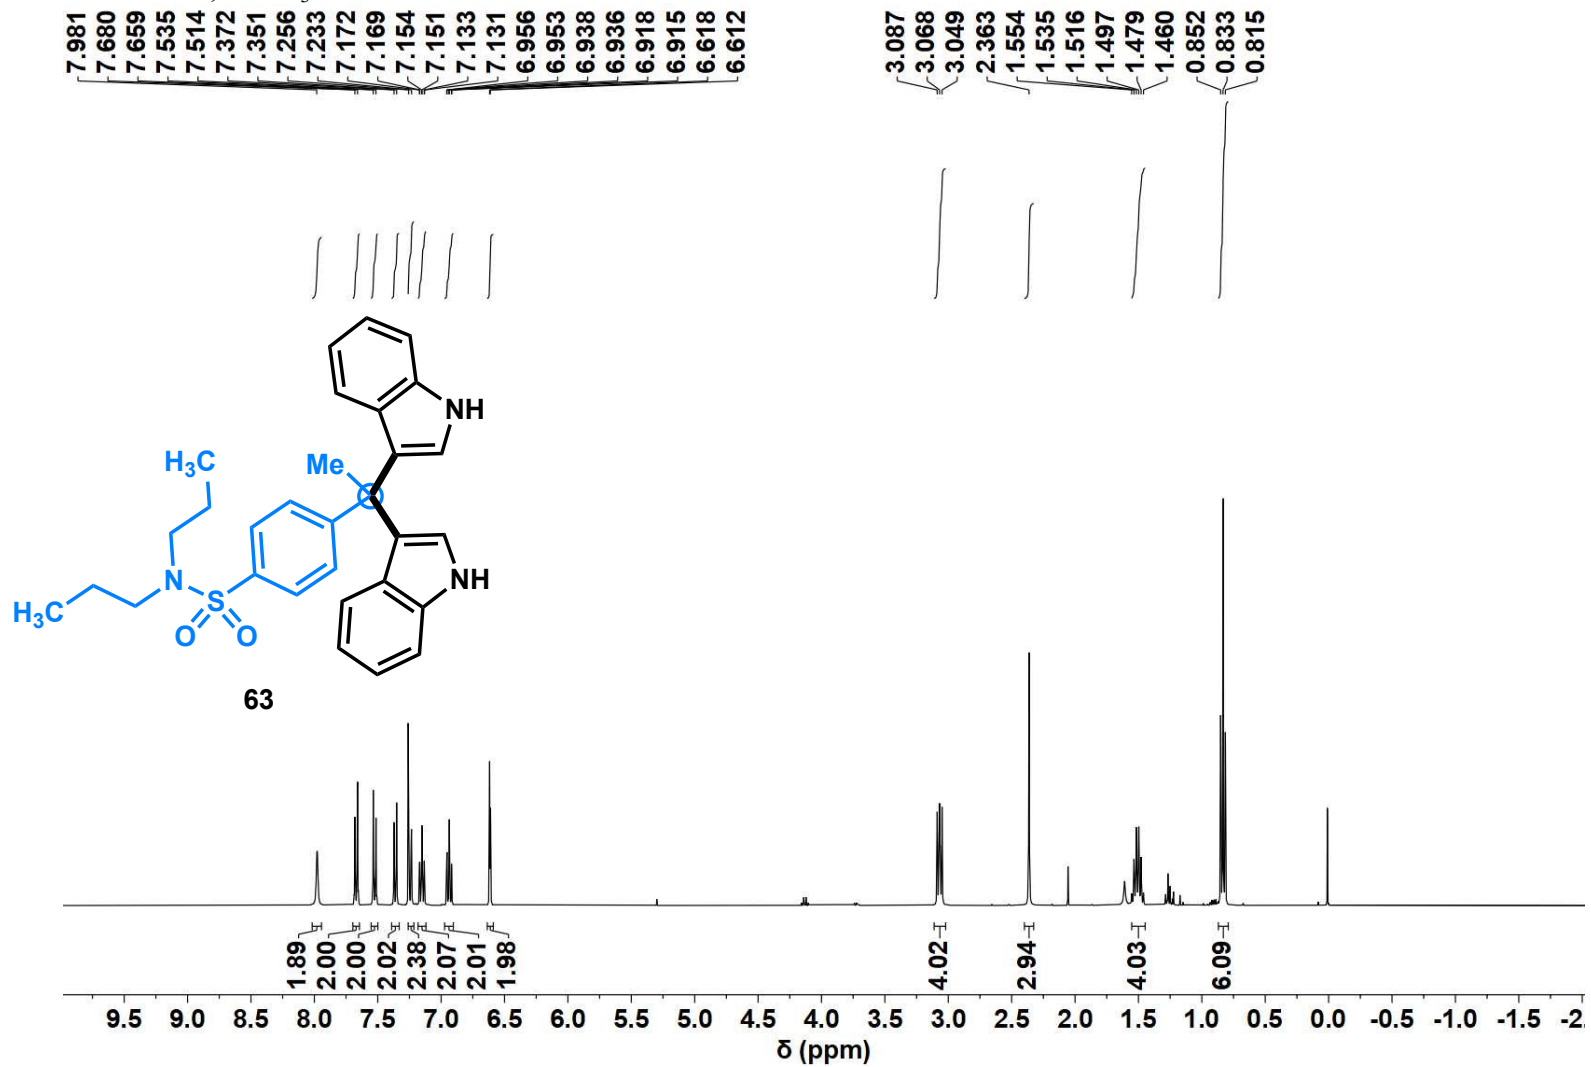

$^{13}\text{C}$  NMR 101 MHz,  $\text{CDCl}_3$

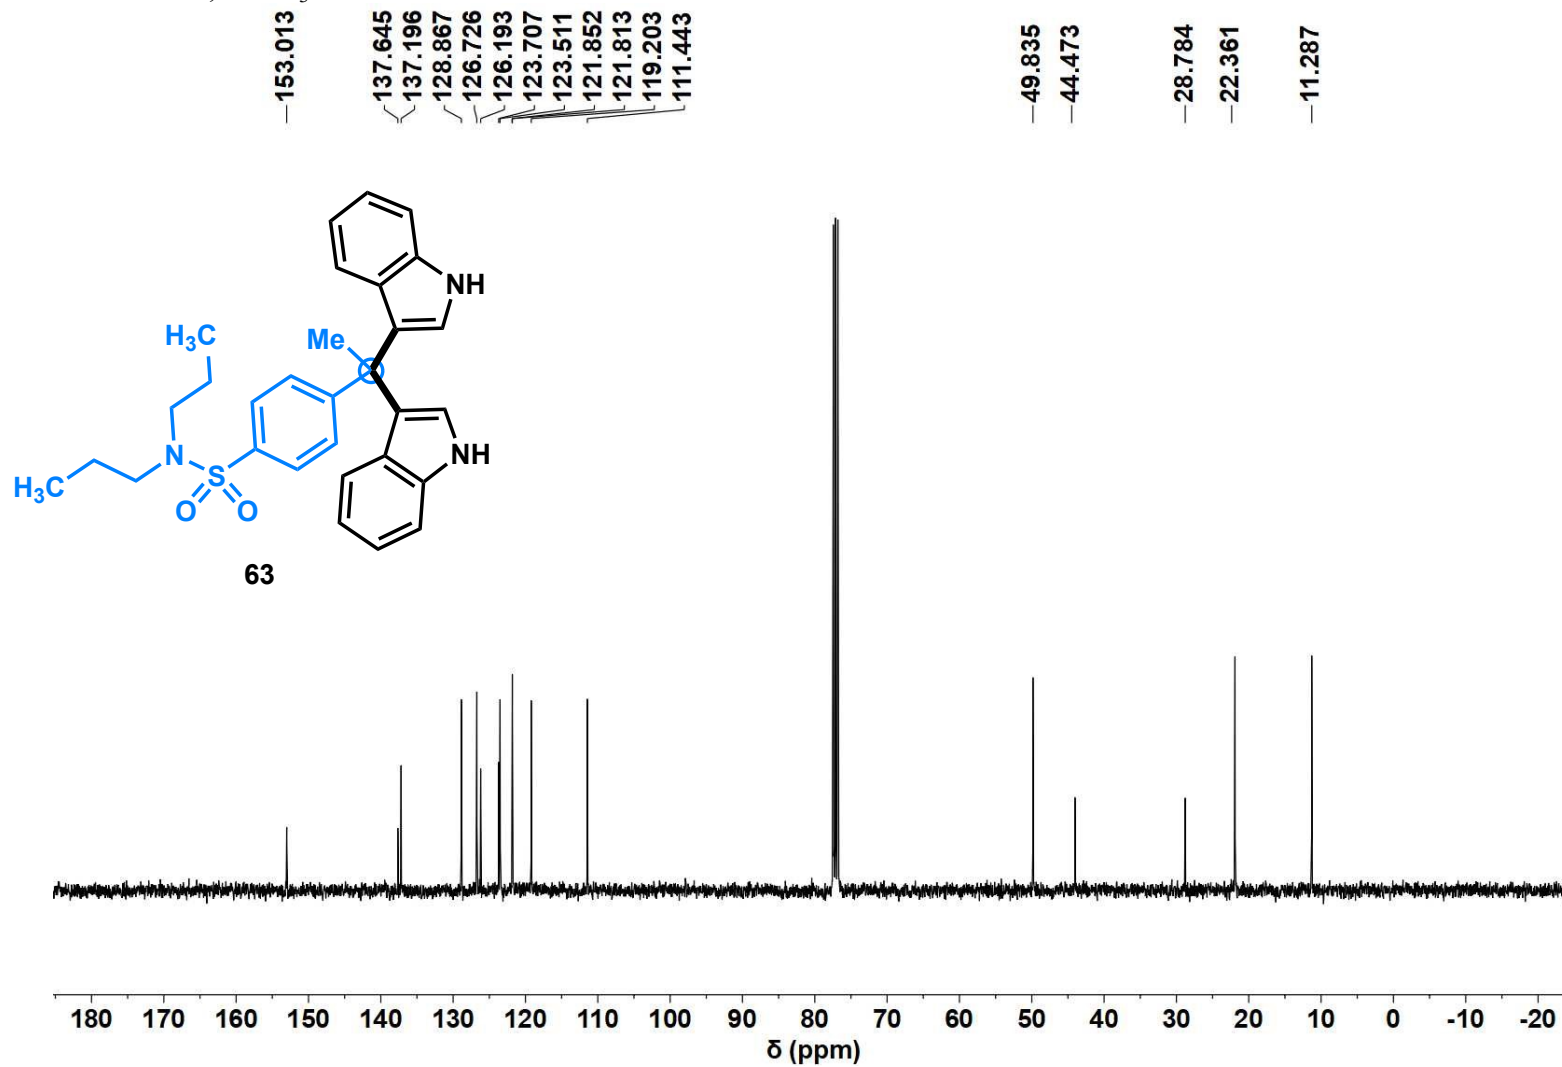

$^1\text{H}$  NMR 400 MHz,  $\text{CDCl}_3$

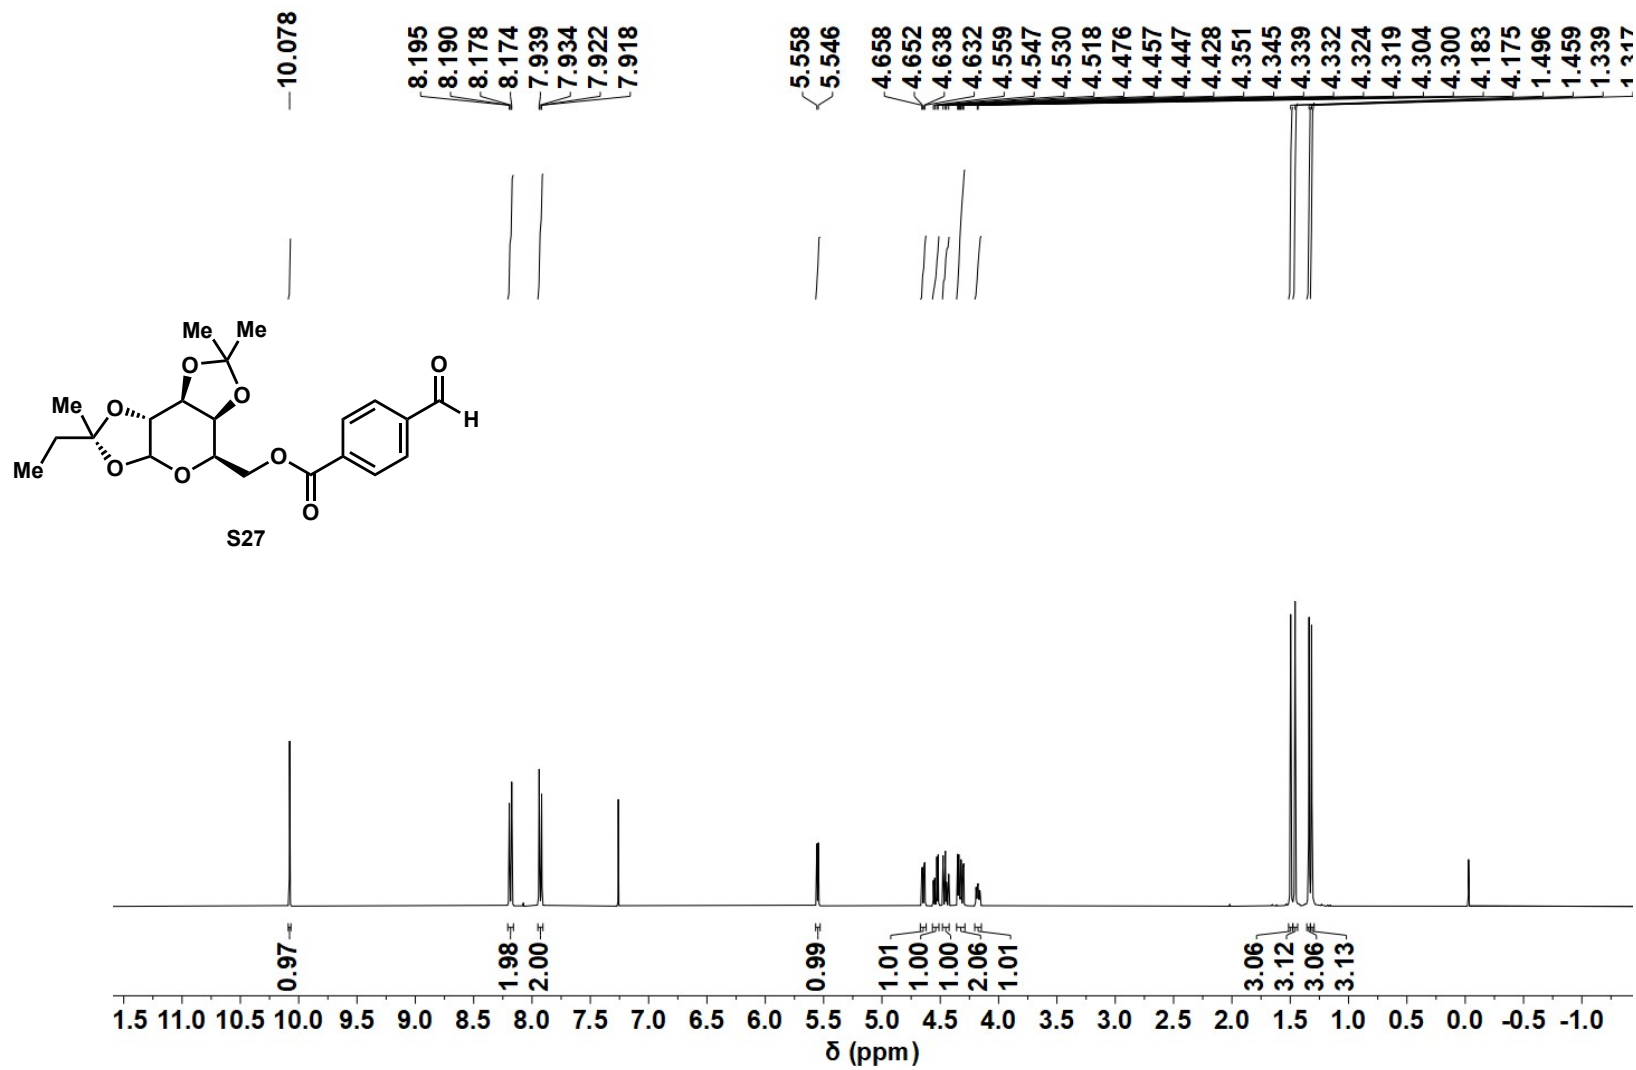

<sup>13</sup>C NMR 100 MHz, CDCl<sub>3</sub>

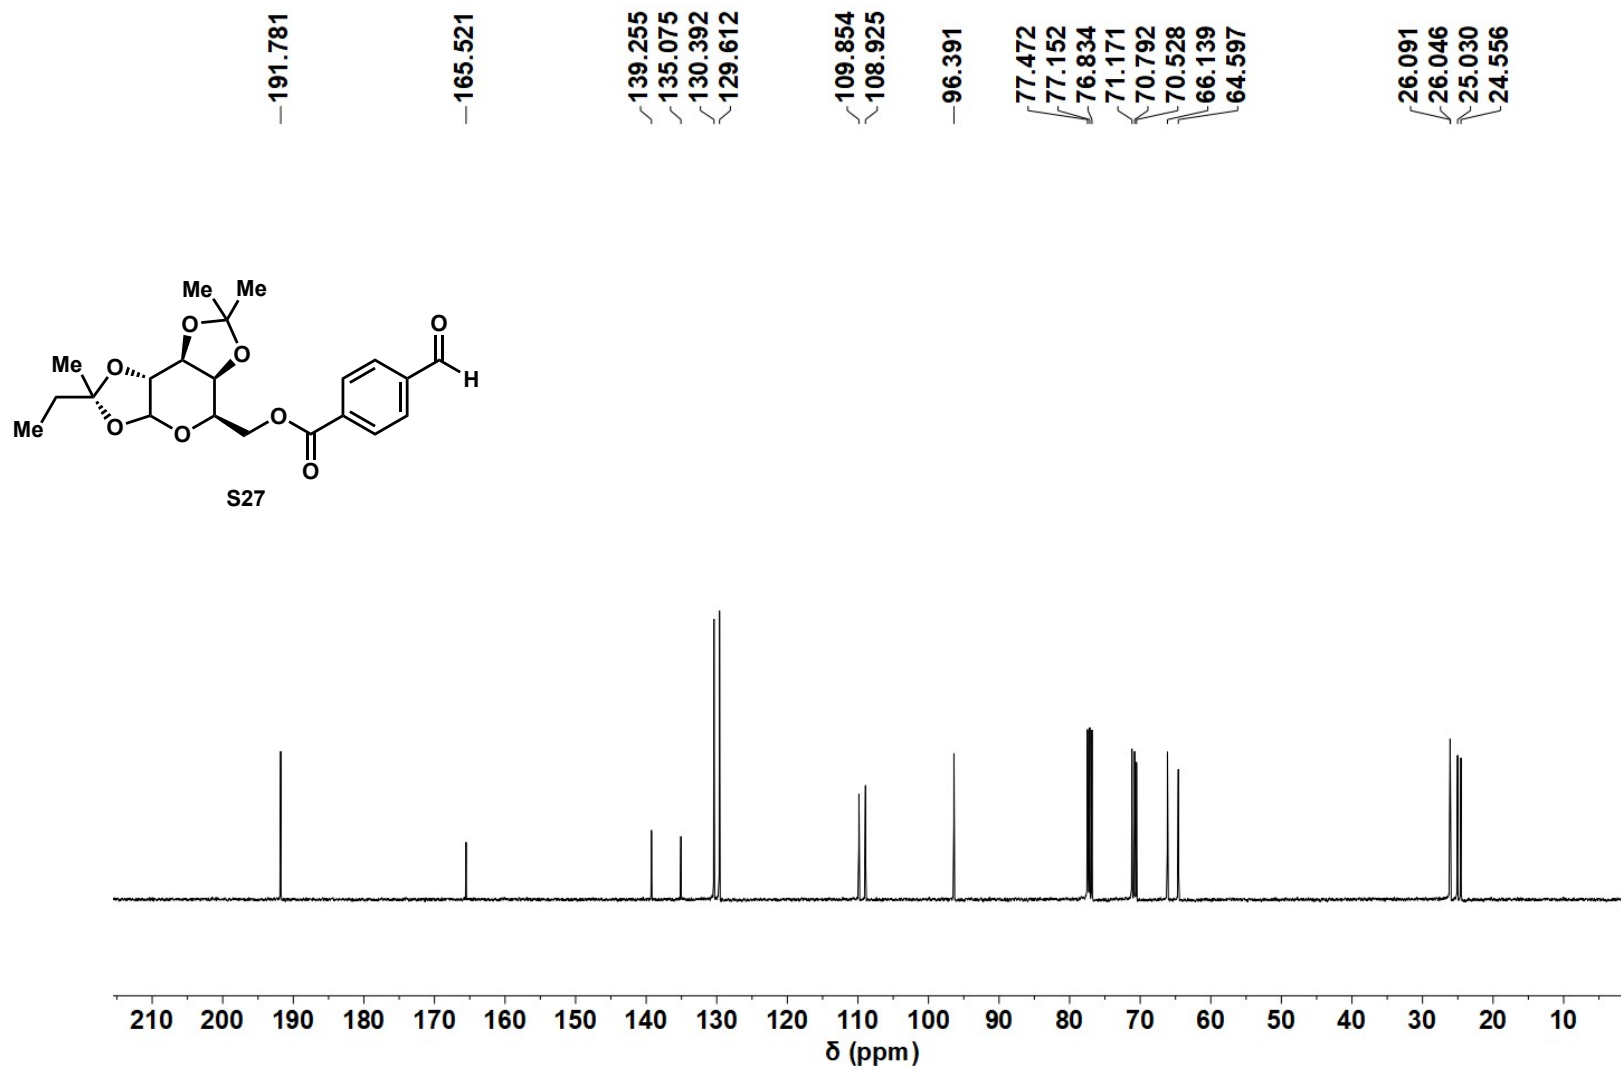

<sup>1</sup>H NMR 400 MHz, CDCl<sub>3</sub>

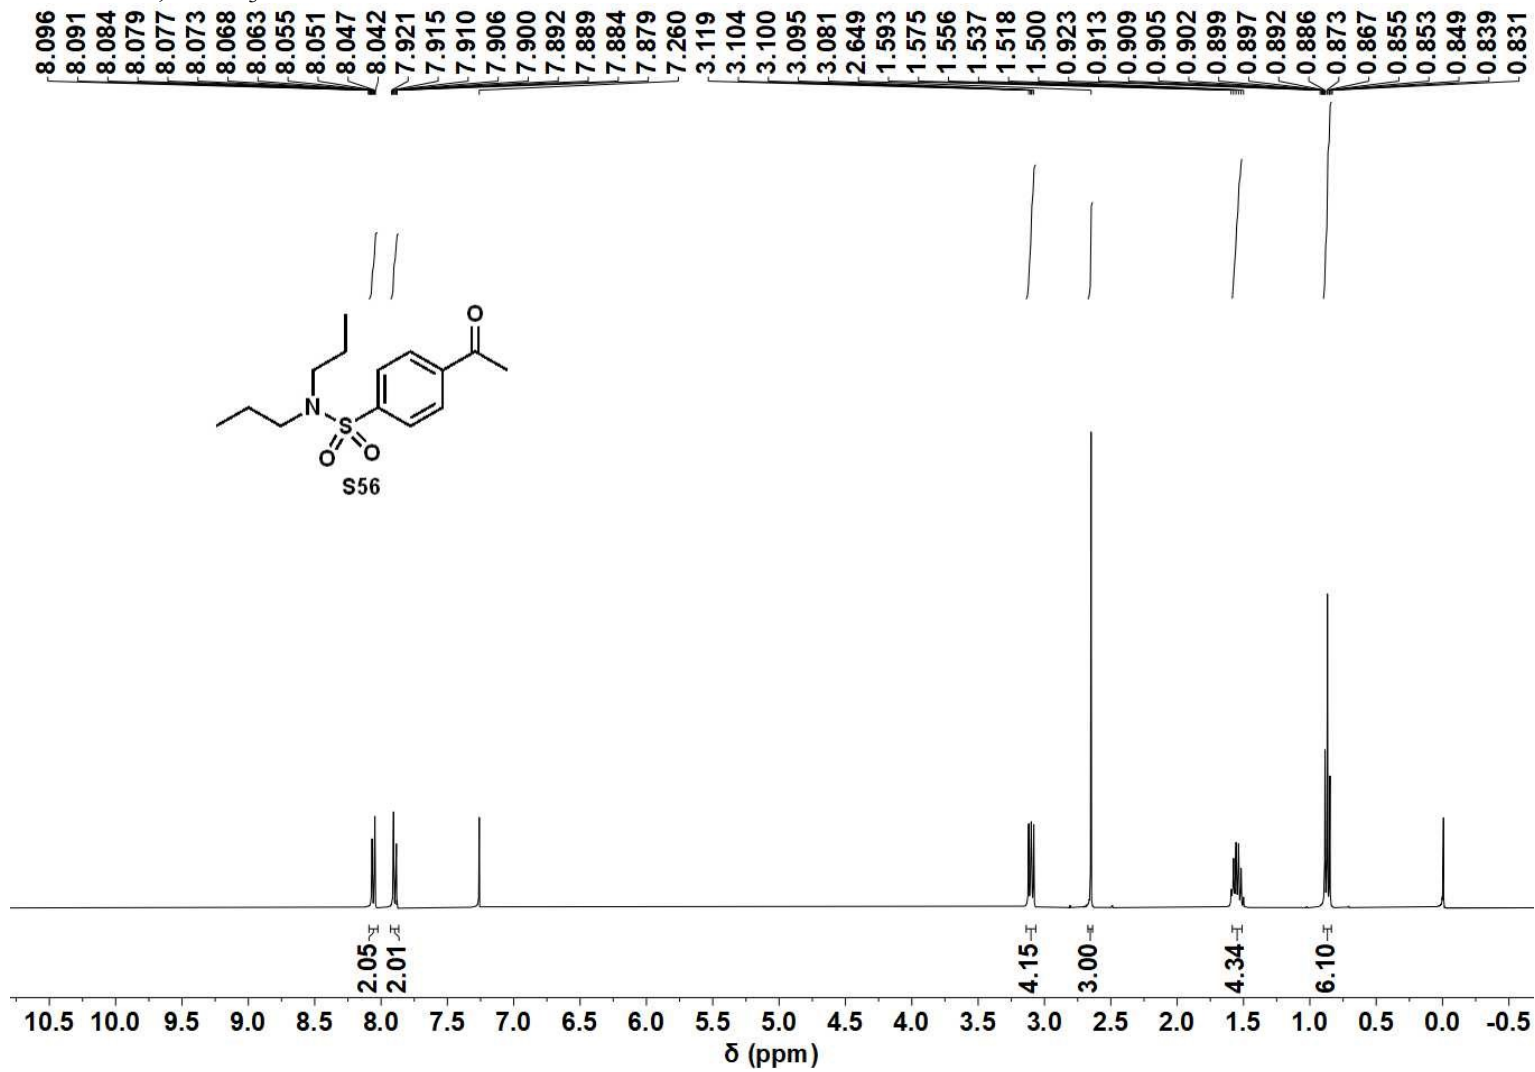

$^{13}\text{C}$  NMR 100 MHz,  $\text{CDCl}_3$

—196.979

—144.318

—139.704

—128.958

—127.361

—50.015

—26.965

—22.035

—11.252

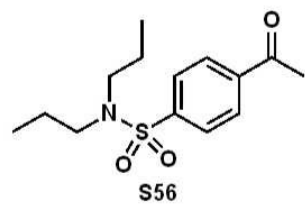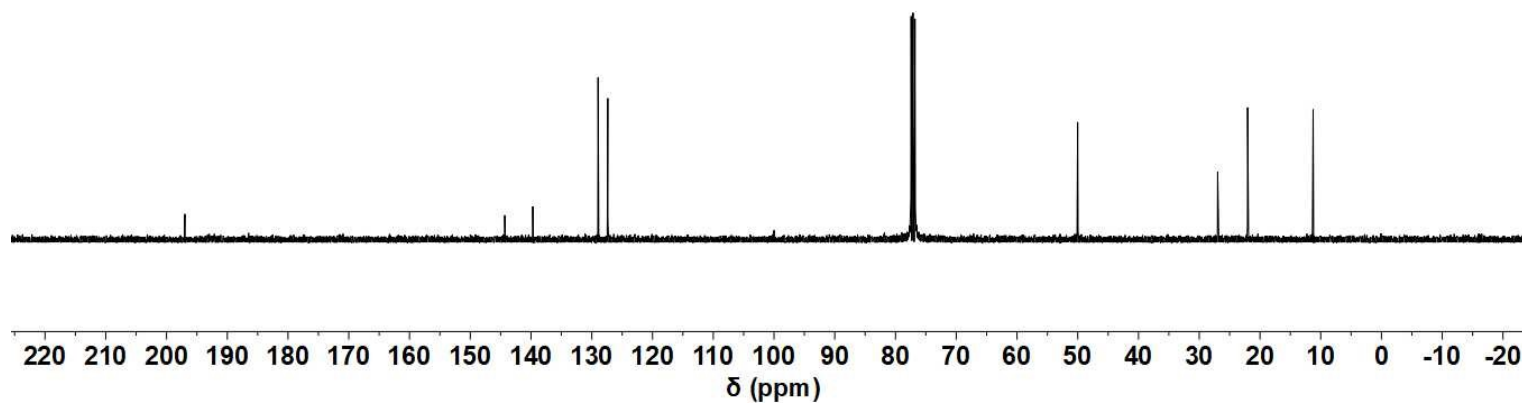

$^1\text{H}$  NMR 400 MHz,  $\text{CDCl}_3$

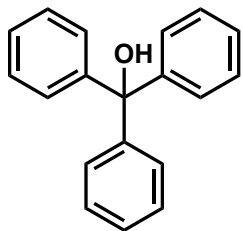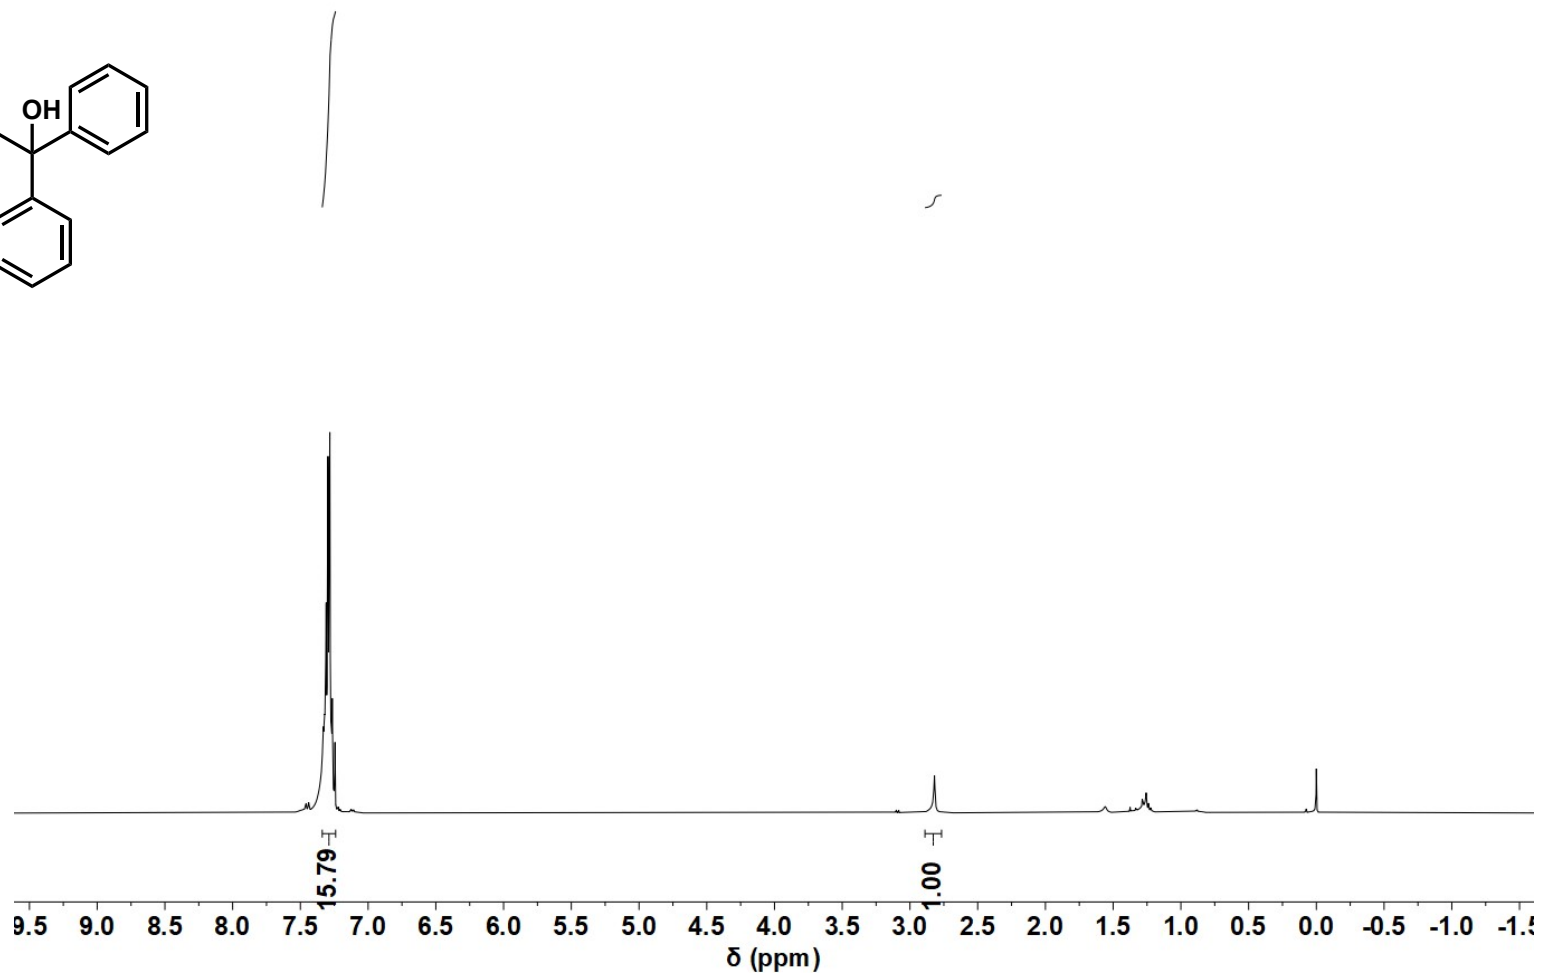



$^{13}\text{C}$  NMR 100 MHz,  $\text{CDCl}_3$

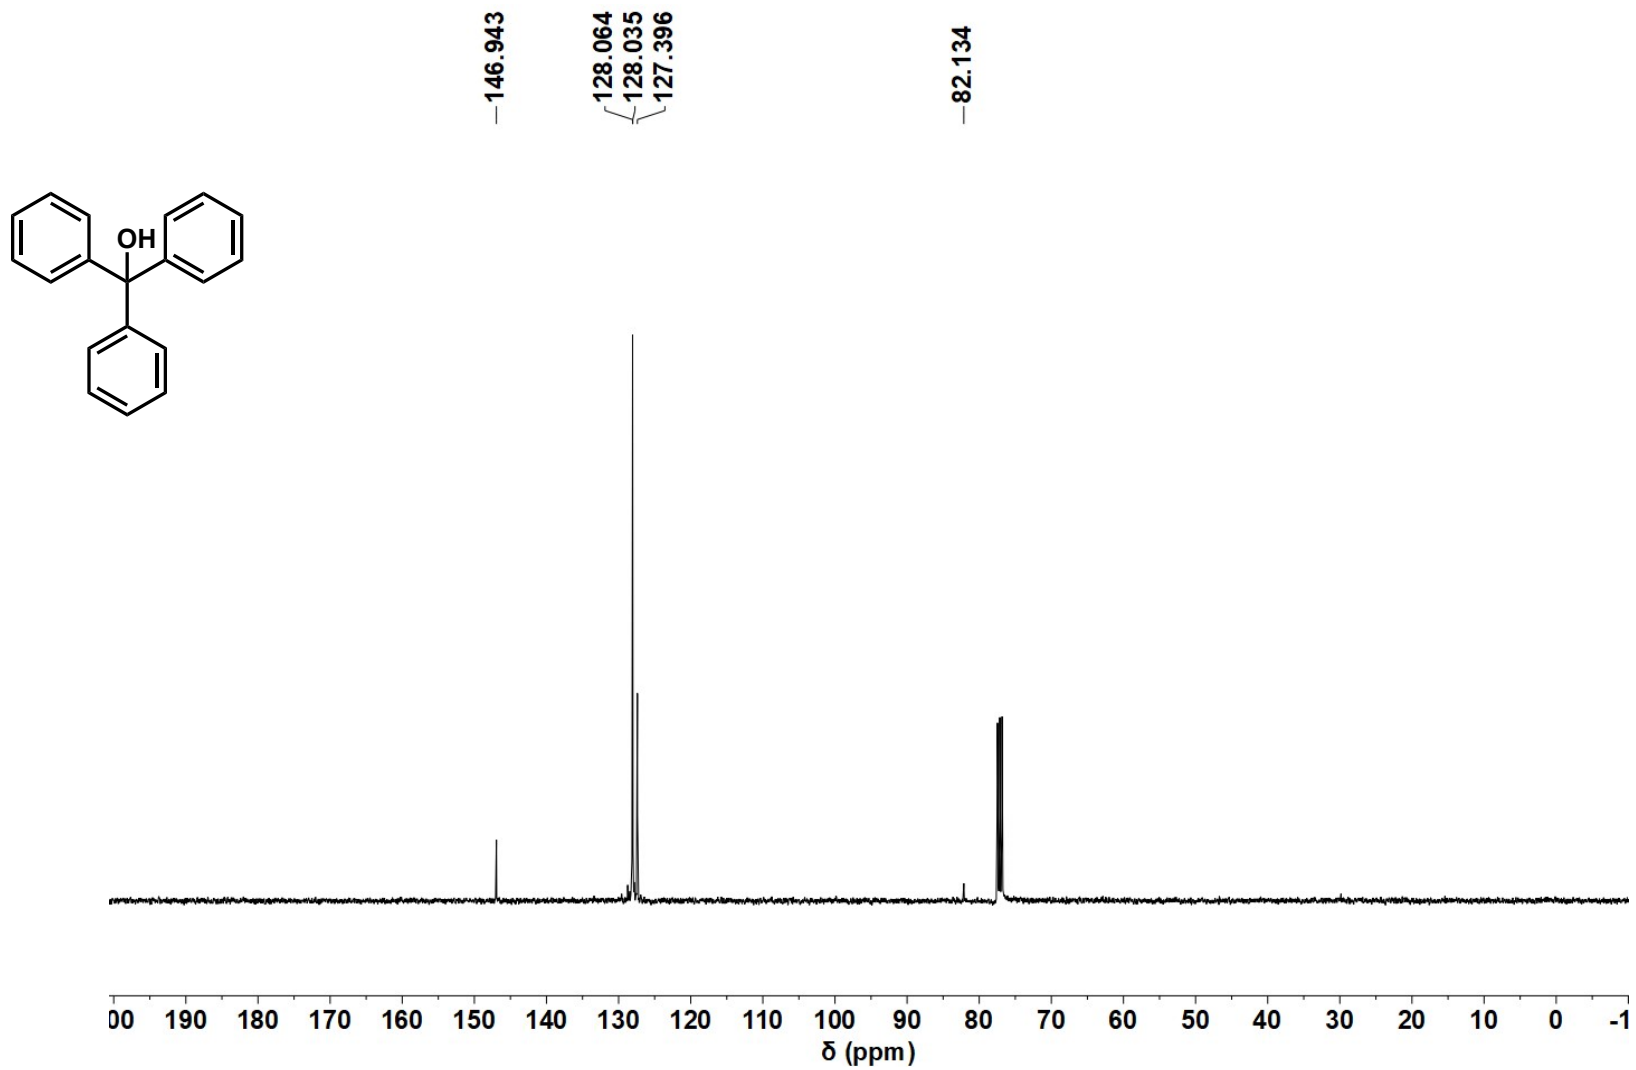

## 11. References:

1. M. X. Yuan, L. J. Jiang, C. Cheng, Y. J. Wang, Y. Li and S. F. Yin, Synthesis and Sedative Activity of 4-Substituted Phenyl-(2,3,4,6-Tetrabenzyloxy)- $\beta$ -D-Allopyranosyloxy Derivatives, *Chem. Nat. Compd.*, 2015, **51**, 252-255.
2. L. Guo, W. Srimontree, C. Zhu, B. Maity, X. Q. Liu, L. Cavallo and M. Rueping, Nickel-Catalyzed Suzuki–Miyaura Cross-Couplings of Aldehydes, *Nat. Commun.*, 2019, **10**, 1957.
3. P. R. Melvin, D. M. Ferguson, D. Sydonie, S. D. Schimler, D. C. Bland and M. S. Sanford, Room Temperature Deoxyfluorination of Benzaldehydes and  $\alpha$ -Ketoesters with Sulfuryl Fluoride and Tetramethylammonium Fluoride, *Org. Lett.*, 2019, **21**, 1350-1353.
4. R. H. Liu, Z. Y. Shen, C. Wang, T. P. Loh and X. H. Hu, Selective Dehydrogenative Acylation of Enamides with Aldehydes Leading to Valuable  $\beta$ -Ketoenamides, *Org. Lett.*, 2020, **22**, 944-949.
5. J. M. Yan, H. W. Cheo, W. K. Teo, X. C. Shi, H. Wu, S. B. Idres, L. W. Deng and J. Wu, A Radical Smiles Rearrangement Promoted by Neutral Eosin Y as a Direct Hydrogen Atom Transfer Photocatalyst, *J. Am. Chem. Soc.*, 2020, **142**, 11357-11362.
6. L. Chen, S. Y. Jin, J. Gao, T. T. Liu, Y. B. Shao, J. Feng, K. Y. Wang, T. Lu and D. Du, N-Heterocyclic Carbene/Magnesium Cocatalyzed Radical Relay Assembly of Aliphatic Keto Nitriles, *Org. Lett.*, 2021, **23**, 394-399.
7. J. Y. S. Laumer, E. Frérot and A. Herrmann, Controlled Release of Perfumery Alcohols by Neighboring-Group Participation. Comparison of the Rate Constants for the Alkaline Hydrolysis of 2-Acyl-, 2-(Hydroxymethyl)-, and 2-Carbamoylbenzoates, *Helv. Chim. Acta.*, **2003**, *86*, 2871-2899.
8. S. H. Yang, A. Shergalis, D. Lu, A. Kyani, Z. W. Liu, M. Ljungman and N. Neamati, Design, Synthesis, and Biological Evaluation of Novel Allosteric Protein Disulfide Isomerase Inhibitors, *J. Med. Chem.*, 2019, **62**, 3447-3474.
9. W. Qiang, X. Liu and T.-P. Loh, Supported Iridium Catalyst for the Green Synthesis of 3,3'-Bis(indolyl)methanes Using Methanol as the Bridging Methylene Source, *ACS Sustainable Chem. Eng.*, 2019, **7**, 8429-8439.
10. T. Pillaiyar, M. Köse, K. Sylvester, H. Weighardt, D. Thimm, G. Borges, I. Förster, I. Kügelgen and C. E. Müller, Diindolylmethane Derivatives: Potent Agonists of the Immunostimulatory Orphan G Protein-Coupled Receptor GPR84, *J. Med. Chem.*, 2017, **60**, 3636-3655.
11. S. Roy, R. Gajbhiye, M. Mandal, C. Pal, A. Meyyapan, J. Mukherjee and P. Jaisankar, Synthesis and Antibacterial Evaluation of 3,3'-Diindolylmethane Derivatives, *Med. Chem. Res.*, 2014, **23**, 1371-1377.
12. A. Nasreen, R. Varala and K. S. Rao, A Green Protocol for the Synthesis of Bis(indolyl)methanes Catalyzed by Succinic Acid under Microwave Irradiation, *Org. Commun.*, 2017, **10**, 104-113.
13. S. Ko, C. Lin, Z. Tu, Y.-F. Wang, C.-C. Wang and C.-F. Yao, CAN and Iodine-Catalyzed Reaction of Indole or 1-Methylindole with  $\alpha,\beta$ -unsaturated Ketone or Aldehyde, *Tetrahedron Lett.*, 2006, **47**, 487-492.
14. M. Esmailpour, B. Akhlaghinia and R. Jahanshahi. Green and Efficient Synthesis of Aryl/alkylbis(indolyl)methanes Using Expanded Perlite-PPA as a Heterogeneous Solid Acid Catalyst in Aqueous Media, *J. Chem. Sci.*, 2017, **129**, 313-328.

15. J. V. Alegre-Requena, A. Valero-Tena, I. G. Sonsona, S. Uriel and R. P. Herrera. Simple Iodoalkyne-based Organocatalysts for the Activation of Carbonyl Compounds, *Org. Biomol. Chem.*, 2020, **18**, 1594-1601.
16. J. Qiao, S. Gao, L. Wang, J. Wei, N. Li and X. Xu. Air-stable  $\mu$ -Oxo-bridged Binuclear Titanium(IV) Salophen Perfluorooctanesulfonate as a Highly Efficient and Recyclable Catalyst for the Synthesis of Bis(indolyl) methane Derivatives, *J. Organomet. Chem.*, 2020, **906**, 121039.
17. Z. M. Salem, J. Saway, and J. J. Badillo, Photoacid-Catalyzed Friedel-Crafts Arylation of Carbonyls, *Org. Lett.*, 2019, **21**, 8528-8532.
18. S. Chandrasekhar, S. Khatun, G. Rajesh and C. R. Reddy,  $B(C_6F_5)_3$ : an Efficient Catalyst for Reductive Alkylation of Alkoxy Benzenes and for Synthesis of Triarylmethanes Using Aldehydes, *Tetrahedron Lett.*, 2009, **50**, 6693-6697.
19. R. Gupta, M. Yadav, R. Gaur, G. Arora, P. Rana, P. Yadav, A. Adholeya and R. K. Sharma, Silica-Coated Magnetic-Nanoparticle-Supported DABCO-Derived Acidic Ionic Liquid for the Efficient Synthesis of Bioactive 3,3-Di(indolyl)indolin-2-ones, *ACS Omega*, 2019, **4**, 21529-21539.
20. B. V. S. Reddy, N. Rajeswari, M. Sarangapani, Y. Prashanthi, R. J. Ganji and A. Addlagatta, Iodine-catalyzed Condensation of Isatin with Indoles: a Facile Synthesis of Di(indolyl)indolin-2-ones and Evaluation of Their Cytotoxicity, *Bioorg. Med. Chem. Lett.*, 2012, **22**, 2460-2463.
21. C.-Y. Kuo, K.-S. Liao, Y.-C. Liu and W.-B. Yang, Bis-Indole Derivatives for Polysaccharide Compositional Analysis and Chiral Resolution of D -, L - Monosaccharides by Ligand Exchange Capillary Electrophoresis Using Borate-Cyclodextrin as a Chiral Selector, *Molecules*, 2011, **16**, 1682-1694.
